# Supplementary material for: A new Fourier transformation method for SAXS of polymer lamellar crystals
Source: Royal Society of Chemistry journal article supplement (doi:10.1039/d0ce00157k), 2020-01-01
Supplement: d0ce00157k1.xlsx [file d0ce00157k1.xlsx]

## Sheet: Fourier Transform Method of IDF
Raw data
q	Scattering intensity before crystallization	Scattering intensity after crystallization	Iq4		Fourier transform Result	Z (nm)	0	0.25	0.5	0.75	1	1.25	1.5	1.75	2	2.25	2.5	2.75	3	3.25	3.5	3.75	4	4.25	4.5	4.75	5	5.25	5.5	5.75	6	6.25	6.5	6.75	7	7.25	7.5	7.75	8	8.25	8.5	8.75	9	9.25	9.5	9.75	10	10.25	10.5
nm-1	a.u.	a.u.	a.u.			IDF	-11.8507	-11.6492	-11.0559	-10.1042	-8.84678	-7.35227	-5.70021	-3.97567	-2.26348	-0.642693	0.81832	2.06581	3.06335	3.79312	4.25574	4.46877	4.46403	4.28398	3.97766	3.59632	3.18931	2.80048	2.46527	2.20885	2.04523	1.97741	1.99843	2.09324	2.241	2.41771	2.59876	2.76134	2.88637	2.95978	2.97331	2.92453	2.8163	2.65584	2.45337	2.2207	1.9698	1.71151	1.45462
0.08191	1926	2291.67	0.0164603				0.0164603	0.0164568	0.0164465	0.0164292	0.0164051	0.0163741	0.0163362	0.0162914	0.0162399	0.0161815	0.0161164	0.0160444	0.0159658	0.0158805	0.0157885	0.0156898	0.0155847	0.0154729	0.0153547	0.01523	0.015099	0.0149616	0.014818	0.0146681	0.0145121	0.01435	0.0141819	0.0140078	0.0138279	0.0136422	0.0134507	0.0132536	0.013051	0.0128428	0.0126293	0.0124105	0.0121865	0.0119574	0.0117233	0.0114842	0.0112404	0.0109918	0.0107386
0.08394	1823.55	2175.42	0.0174684				0.0174684	0.0174646	0.0174531	0.0174338	0.0174069	0.0173724	0.0173302	0.0172803	0.0172229	0.0171578	0.0170852	0.0170051	0.0169175	0.0168224	0.01672	0.0166101	0.016493	0.0163686	0.016237	0.0160982	0.0159524	0.0157995	0.0156397	0.0154729	0.0152994	0.0151191	0.0149322	0.0147387	0.0145387	0.0143323	0.0141196	0.0139007	0.0136756	0.0134446	0.0132076	0.0129648	0.0127163	0.0124621	0.0122025	0.0119376	0.0116673	0.011392	0.0111116
0.08596	1714.21	2048.44	0.0182486				0.0182486	0.0182444	0.0182317	0.0182107	0.0181812	0.0181433	0.0180971	0.0180425	0.0179796	0.0179083	0.0178288	0.0177411	0.0176452	0.0175411	0.0174289	0.0173087	0.0171804	0.0170443	0.0169003	0.0167484	0.0165889	0.0164216	0.0162468	0.0160645	0.0158748	0.0156777	0.0154734	0.015262	0.0150435	0.014818	0.0145857	0.0143467	0.0141011	0.0138489	0.0135903	0.0133255	0.0130545	0.0127775	0.0124946	0.0122059	0.0119116	0.0116118	0.0113066
0.08798	1617.46	1938.02	0.019206				0.019206	0.0192014	0.0191875	0.0191642	0.0191318	0.01909	0.019039	0.0189788	0.0189095	0.018831	0.0187433	0.0186466	0.0185409	0.0184262	0.0183026	0.0181702	0.0180289	0.017879	0.0177204	0.0175532	0.0173775	0.0171934	0.017001	0.0168004	0.0165916	0.0163749	0.0161502	0.0159177	0.0156774	0.0154296	0.0151744	0.0149118	0.014642	0.0143651	0.0140812	0.0137906	0.0134932	0.0131894	0.0128791	0.0125627	0.0122401	0.0119116	0.0115774
0.09001	1520.87	1824.93	0.0199581				0.0199581	0.0199531	0.0199379	0.0199127	0.0198773	0.0198319	0.0197765	0.0197111	0.0196356	0.0195502	0.019455	0.0193498	0.0192349	0.0191103	0.0189759	0.018832	0.0186785	0.0185155	0.0183432	0.0181616	0.0179708	0.0177709	0.017562	0.0173442	0.0171177	0.0168824	0.0166386	0.0163864	0.0161259	0.0158572	0.0155805	0.0152959	0.0150036	0.0147037	0.0143963	0.0140816	0.0137598	0.013431	0.0130955	0.0127533	0.0124046	0.0120497	0.0116886
0.09203	1427.46	1729.45	0.0216633				0.0216633	0.0216575	0.0216403	0.0216117	0.0215716	0.0215201	0.0214572	0.0213829	0.0212973	0.0212005	0.0210924	0.0209732	0.0208428	0.0207015	0.0205491	0.0203859	0.0202119	0.0200273	0.019832	0.0196262	0.01941	0.0191835	0.0189469	0.0187003	0.0184437	0.0181774	0.0179015	0.0176161	0.0173214	0.0170175	0.0167046	0.0163829	0.0160525	0.0157135	0.0153663	0.015011	0.0146476	0.0142766	0.013898	0.013512	0.0131189	0.0127188	0.012312
0.09405	1340.09	1634.09	0.0230029				0.0230029	0.0229966	0.0229775	0.0229457	0.0229013	0.0228441	0.0227744	0.0226921	0.0225972	0.0224898	0.02237	0.0222378	0.0220934	0.0219367	0.0217679	0.021587	0.0213943	0.0211897	0.0209733	0.0207454	0.0205061	0.0202553	0.0199934	0.0197205	0.0194366	0.019142	0.0188368	0.0185212	0.0181954	0.0178595	0.0175137	0.0171582	0.0167933	0.0164191	0.0160358	0.0156436	0.0152428	0.0148335	0.0144161	0.0139907	0.0135576	0.0131169	0.012669
0.09607	1255.26	1545.4	0.0247146				0.0247146	0.0247075	0.0246861	0.0246505	0.0246006	0.0245366	0.0244584	0.0243661	0.0242598	0.0241395	0.0240052	0.0238571	0.0236952	0.0235197	0.0233306	0.023128	0.0229121	0.022683	0.0224408	0.0221857	0.0219177	0.0216371	0.0213441	0.0210387	0.0207212	0.0203917	0.0200505	0.0196977	0.0193336	0.0189583	0.018572	0.0181751	0.0177676	0.0173499	0.0169223	0.0164848	0.0160378	0.0155816	0.0151164	0.0146425	0.0141601	0.0136696	0.0131712
0.0981	1180.45	1475.87	0.0273605				0.0273605	0.0273523	0.0273276	0.0272865	0.027229	0.0271551	0.0270648	0.0269583	0.0268356	0.0266967	0.0265418	0.0263709	0.0261842	0.0259817	0.0257635	0.0255299	0.0252809	0.0250168	0.0247375	0.0244434	0.0241346	0.0238113	0.0234737	0.0231219	0.0227562	0.0223769	0.0219841	0.0215781	0.021159	0.0207273	0.0202831	0.0198267	0.0193584	0.0188784	0.0183871	0.0178847	0.0173716	0.016848	0.0163142	0.0157707	0.0152177	0.0146555	0.0140845
0.10012	1109.08	1409.19	0.0301547				0.0301547	0.0301453	0.0301169	0.0300697	0.0300037	0.0299189	0.0298153	0.029693	0.0295522	0.0293928	0.029215	0.0290189	0.0288047	0.0285724	0.0283222	0.0280542	0.0277687	0.0274658	0.0271456	0.0268085	0.0264546	0.0260841	0.0256972	0.0252943	0.0248755	0.0244411	0.0239914	0.0235267	0.0230473	0.0225534	0.0220454	0.0215235	0.0209882	0.0204397	0.0198785	0.0193048	0.0187189	0.0181214	0.0175125	0.0168926	0.0162622	0.0156216	0.0149711
0.10214	1044.62	1343.16	0.0324932				0.0324932	0.0324826	0.0324508	0.0323979	0.0323238	0.0322287	0.0321126	0.0319755	0.0318176	0.0316389	0.0314396	0.0312198	0.0309796	0.0307193	0.0304389	0.0301387	0.0298188	0.0294795	0.0291209	0.0287434	0.0283471	0.0279324	0.0274994	0.0270485	0.02658	0.0260941	0.0255913	0.0250717	0.0245358	0.0239839	0.0234164	0.0228336	0.0222359	0.0216237	0.0209974	0.0203574	0.0197042	0.0190381	0.0183595	0.0176691	0.016967	0.016254	0.0155303
0.10416	989.61	1284.27	0.034684				0.034684	0.0346722	0.034637	0.0345782	0.034496	0.0343904	0.0342615	0.0341094	0.0339341	0.0337359	0.0335147	0.0332708	0.0330044	0.0327156	0.0324046	0.0320716	0.0317169	0.0313407	0.0309432	0.0305248	0.0300856	0.0296261	0.0291465	0.0286471	0.0281283	0.0275904	0.0270338	0.0264588	0.025866	0.0252556	0.024628	0.0239838	0.0233233	0.022647	0.0219554	0.0212488	0.0205278	0.019793	0.0190447	0.0182835	0.0175099	0.0167244	0.0159276
0.10619	939.689	1227.6	0.0366089				0.0366089	0.036596	0.0365573	0.0364928	0.0364027	0.0362868	0.0361454	0.0359786	0.0357863	0.0355689	0.0353264	0.035059	0.0347669	0.0344502	0.0341094	0.0337444	0.0333557	0.0329435	0.0325081	0.0320497	0.0315688	0.0310656	0.0305405	0.029994	0.0294262	0.0288378	0.028229	0.0276003	0.0269521	0.026285	0.0255994	0.0248957	0.0241744	0.0234362	0.0226814	0.0219106	0.0211244	0.0203233	0.0195078	0.0186787	0.0178363	0.0169814	0.0161146
0.10821	889.264	1179.71	0.039823				0.039823	0.0398084	0.0397647	0.0396919	0.03959	0.0394592	0.0392995	0.0391111	0.038894	0.0386484	0.0383746	0.0380727	0.037743	0.0373856	0.0370008	0.036589	0.0361504	0.0356854	0.0351942	0.0346773	0.034135	0.0335677	0.0329759	0.0323599	0.0317202	0.0310574	0.0303718	0.029664	0.0289344	0.0281837	0.0274124	0.026621	0.0258102	0.0249804	0.0241324	0.0232667	0.0223839	0.0214848	0.02057	0.0196401	0.0186959	0.017738	0.016767
0.11023	849.06	1132.56	0.0418549				0.0418549	0.041839	0.0417914	0.041712	0.0416009	0.0414582	0.0412841	0.0410786	0.0408419	0.0405742	0.0402757	0.0399466	0.0395872	0.0391977	0.0387784	0.0383297	0.0378519	0.0373453	0.0368104	0.0362476	0.0356572	0.0350397	0.0343956	0.0337254	0.0330296	0.0323087	0.0315633	0.0307939	0.0300011	0.0291856	0.0283479	0.0274886	0.0266085	0.0257082	0.0247883	0.0238497	0.0228929	0.0219187	0.0209279	0.0199212	0.0188994	0.0178632	0.0168135
0.11225	806.225	1091.43	0.045279				0.045279	0.0452611	0.0452077	0.0451186	0.044994	0.044834	0.0446386	0.0444082	0.0441427	0.0438425	0.0435078	0.0431388	0.0427358	0.0422992	0.0418293	0.0413264	0.040791	0.0402235	0.0396243	0.0389939	0.0383327	0.0376414	0.0369205	0.0361705	0.035392	0.0345856	0.033752	0.0328919	0.0320058	0.0310945	0.0301588	0.0291992	0.0282167	0.027212	0.0261859	0.0251391	0.0240725	0.022987	0.0218834	0.0207625	0.0196253	0.0184726	0.0173054
0.11428	770.699	1053.59	0.0482504				0.0482504	0.0482307	0.0481717	0.0480733	0.0479357	0.0477589	0.0475432	0.0472887	0.0469956	0.0466641	0.0462946	0.0458872	0.0454424	0.0449605	0.044442	0.0438871	0.0432964	0.0426704	0.0420096	0.0413144	0.0405856	0.0398236	0.0390291	0.0382028	0.0373453	0.0364573	0.0355395	0.0345928	0.0336178	0.0326153	0.0315863	0.0305315	0.0294517	0.0283479	0.027221	0.0260718	0.0249014	0.0237107	0.0225006	0.0212721	0.0200263	0.0187641	0.0174866
0.1163	734.669	1016.81	0.0516157				0.0516157	0.0515939	0.0515285	0.0514195	0.051267	0.0510713	0.0508323	0.0505504	0.0502257	0.0498586	0.0494494	0.0489983	0.0485058	0.0479724	0.0473983	0.0467842	0.0461306	0.045438	0.0447069	0.0439381	0.0431321	0.0422897	0.0414115	0.0404983	0.0395509	0.0385701	0.0375566	0.0365114	0.0354354	0.0343294	0.0331943	0.0320312	0.0308411	0.0296248	0.0283836	0.0271183	0.0258301	0.0245201	0.0231893	0.021839	0.0204701	0.019084	0.0176818
0.11832	698.514	982.471	0.0556525				0.0556525	0.0556282	0.0555552	0.0554335	0.0552634	0.0550449	0.0547783	0.0544638	0.0541015	0.053692	0.0532355	0.0527324	0.0521832	0.0515883	0.0509483	0.0502637	0.0495351	0.0487632	0.0479486	0.0470921	0.0461943	0.0452562	0.0442785	0.043262	0.0422076	0.0411164	0.0399892	0.0388269	0.0376308	0.0364016	0.0351407	0.033849	0.0325277	0.0311779	0.0298008	0.0283977	0.0269697	0.0255181	0.0240443	0.0225493	0.0210347	0.0195016	0.0179515
0.12034	663.967	955.415	0.0611223				0.0611223	0.0610946	0.0610117	0.0608735	0.0606803	0.0604321	0.0601292	0.0597719	0.0593605	0.0588954	0.058377	0.0578057	0.0571822	0.0565069	0.0557804	0.0550035	0.0541767	0.053301	0.052377	0.0514056	0.0503877	0.0493241	0.048216	0.0470642	0.0458698	0.0446339	0.0433576	0.042042	0.0406884	0.039298	0.037872	0.0364118	0.0349185	0.0333937	0.0318387	0.0302548	0.0286436	0.0270064	0.0253448	0.0236603	0.0219543	0.0202285	0.0184844
0.12237	633.045	927.929	0.0661228				0.0661228	0.0660919	0.0659991	0.0658445	0.0656284	0.0653508	0.065012	0.0646125	0.0641524	0.0636323	0.0630527	0.062414	0.061717	0.0609622	0.0601503	0.0592822	0.0583585	0.0573803	0.0563483	0.0552637	0.0541273	0.0529402	0.0517037	0.0504187	0.0490865	0.0477084	0.0462857	0.0448196	0.0433116	0.0417631	0.0401755	0.0385503	0.036889	0.0351932	0.0334644	0.0317044	0.0299147	0.0280969	0.0262529	0.0243843	0.0224929	0.0205805	0.0186487
0.12439	605.376	904.667	0.071653				0.071653	0.0716184	0.0715145	0.0713414	0.0710994	0.0707886	0.0704094	0.0699621	0.0694471	0.068865	0.0682162	0.0675016	0.0667216	0.0658771	0.064969	0.063998	0.0629651	0.0618713	0.0607177	0.0595054	0.0582356	0.0569094	0.0555282	0.0540933	0.0526061	0.0510681	0.0494806	0.0478453	0.0461638	0.0444376	0.0426684	0.040858	0.0390081	0.0371204	0.0351969	0.0332393	0.0312496	0.0292296	0.0271814	0.0251069	0.0230082	0.0208872	0.0187459
0.12641	576.787	880.172	0.0774674				0.0774674	0.0774287	0.0773127	0.0771195	0.0768493	0.0765023	0.0760789	0.0755796	0.0750048	0.0743551	0.0736311	0.0728336	0.0719633	0.0710212	0.0700082	0.0689253	0.0677735	0.066554	0.0652681	0.063917	0.0625021	0.0610248	0.0594865	0.0578888	0.0562333	0.0545216	0.0527555	0.0509367	0.0490671	0.0471484	0.0451827	0.0431718	0.0411179	0.0390228	0.0368888	0.034718	0.0325125	0.0302745	0.0280063	0.0257101	0.0233882	0.021043	0.0186768
0.12843	551.505	866.188	0.0856131				0.0856131	0.085569	0.0854366	0.0852162	0.084908	0.0845122	0.0840294	0.0834599	0.0828043	0.0820635	0.081238	0.0803288	0.0793368	0.078263	0.0771085	0.0758745	0.0745624	0.0731733	0.0717089	0.0701705	0.0685598	0.0668784	0.0651281	0.0633107	0.061428	0.0594819	0.0574746	0.055408	0.0532843	0.0511057	0.0488744	0.0465927	0.044263	0.0418876	0.0394691	0.0370099	0.0345126	0.0319796	0.0294137	0.0268175	0.0241937	0.0215449	0.0188739
0.13046	529.12	848.701	0.0925745				0.0925745	0.0925252	0.0923776	0.0921317	0.0917878	0.0913463	0.0908076	0.0901723	0.0894411	0.0886148	0.0876942	0.0866804	0.0855743	0.0843773	0.0830904	0.0817152	0.0802531	0.0787057	0.0770745	0.0753613	0.073568	0.0716964	0.0697486	0.0677266	0.0656325	0.0634686	0.0612373	0.0589408	0.0565816	0.0541622	0.0516852	0.0491532	0.046569	0.0439352	0.0412547	0.0385303	0.0357649	0.0329615	0.030123	0.0272525	0.024353	0.0214276	0.0184794
0.13248	508.505	833.441	0.100092				0.100092	0.100037	0.0998723	0.0995982	0.0992148	0.0987225	0.098122	0.0974139	0.0965989	0.095678	0.0946521	0.0935224	0.0922902	0.0909567	0.0895234	0.087992	0.086364	0.0846413	0.0828258	0.0809194	0.0789243	0.0768426	0.0746766	0.0724287	0.0701014	0.0676971	0.0652187	0.0626687	0.0600499	0.0573653	0.0546178	0.0518103	0.0489461	0.0460281	0.0430597	0.040044	0.0369844	0.0338843	0.030747	0.0275759	0.0243746	0.0211466	0.0178954
0.1345	489.053	822.357	0.109076				0.109076	0.109015	0.10883	0.108522	0.108091	0.107538	0.106864	0.106069	0.105154	0.10412	0.102968	0.1017	0.100317	0.0988201	0.0972118	0.0954937	0.0936676	0.0917356	0.0896999	0.0875628	0.0853267	0.0829942	0.0805678	0.0780503	0.0754446	0.0727536	0.0699803	0.0671279	0.0641997	0.0611988	0.0581288	0.054993	0.0517951	0.0485386	0.0452273	0.0418648	0.038455	0.0350017	0.0315089	0.0279804	0.0244203	0.0208325	0.0172213
0.13652	466.646	812.424	0.120111				0.120111	0.120041	0.119831	0.119482	0.118994	0.118367	0.117602	0.1167	0.115662	0.114489	0.113183	0.111745	0.110178	0.108481	0.106659	0.104712	0.102643	0.100455	0.0981494	0.0957297	0.0931985	0.0905588	0.0878136	0.0849661	0.0820197	0.0789777	0.0758437	0.0726214	0.0693145	0.0659269	0.0624625	0.0589253	0.0553195	0.0516493	0.0479189	0.0441327	0.0402951	0.0364105	0.0324836	0.0285188	0.0245208	0.0204943	0.0164438
0.13855	446.779	799.048	0.129808				0.129808	0.12973	0.129496	0.129108	0.128564	0.127866	0.127015	0.126011	0.124856	0.123551	0.122098	0.120499	0.118755	0.116869	0.114842	0.112678	0.110378	0.107946	0.105385	0.102697	0.0998861	0.0969553	0.0939081	0.0907482	0.0874795	0.0841059	0.0806313	0.0770601	0.0733963	0.0696446	0.0658093	0.061895	0.0579065	0.0538485	0.0497259	0.0455437	0.0413068	0.0370204	0.0326896	0.0283195	0.0239155	0.0194828	0.0150267
0.14057	430.033	791.788	0.141249				0.141249	0.141162	0.1409	0.140465	0.139856	0.139074	0.13812	0.136997	0.135703	0.134243	0.132616	0.130826	0.128874	0.126763	0.124496	0.122074	0.119502	0.116783	0.113919	0.110915	0.107773	0.104499	0.101095	0.0975669	0.0939181	0.0901533	0.0862771	0.0822944	0.0782101	0.0740292	0.0697569	0.0653985	0.0609592	0.0564448	0.0518606	0.0472123	0.0425058	0.0377468	0.0329412	0.0280949	0.0232139	0.0183042	0.0133719
0.14259	413.721	781.075	0.15186				0.15186	0.151763	0.151474	0.150992	0.150318	0.149454	0.148399	0.147156	0.145726	0.144111	0.142313	0.140333	0.138176	0.135843	0.133337	0.130662	0.127821	0.124818	0.121656	0.118339	0.114872	0.111259	0.107505	0.103614	0.0995911	0.095442	0.0911716	0.0867854	0.0822889	0.0776878	0.072988	0.0681955	0.0633163	0.0583567	0.053323	0.0482214	0.0430586	0.0378411	0.0325756	0.0272686	0.021927	0.0165575	0.011167
0.14462	398.303	774.199	0.16443				0.16443	0.164323	0.164	0.163464	0.162713	0.161751	0.160576	0.159192	0.1576	0.155801	0.1538	0.151597	0.149196	0.146599	0.143812	0.140836	0.137676	0.134337	0.130821	0.127135	0.123283	0.119269	0.1151	0.11078	0.106315	0.101711	0.0969749	0.0921115	0.0871278	0.0820302	0.0768254	0.0715201	0.0661214	0.0606362	0.0550718	0.0494355	0.0437345	0.0379763	0.0321685	0.0263187	0.0204344	0.0145235	0.00859353
0.14664	384.691	772.325	0.179239				0.179239	0.179118	0.178757	0.178156	0.177315	0.176236	0.17492	0.173369	0.171585	0.169571	0.167329	0.164861	0.162173	0.159266	0.156145	0.152815	0.149279	0.145543	0.14161	0.137488	0.133181	0.128695	0.124036	0.11921	0.114224	0.109085	0.103799	0.0983735	0.0928158	0.0871334	0.081334	0.0754252	0.0694151	0.0633117	0.0571232	0.0508579	0.0445243	0.0381309	0.0316863	0.025199	0.0186779	0.0121317	0.00556919
0.14866	370.77	770.762	0.195357				0.195357	0.195222	0.194817	0.194144	0.193202	0.191994	0.19052	0.188783	0.186786	0.18453	0.18202	0.179258	0.176249	0.172996	0.169504	0.165779	0.161824	0.157646	0.15325	0.148642	0.143829	0.138818	0.133615	0.128227	0.122662	0.116928	0.111032	0.104983	0.0987891	0.0924586	0.0860004	0.0794235	0.0727368	0.0659497	0.0590716	0.0521118	0.0450801	0.0379861	0.0308396	0.0236506	0.0164289	0.0091845	0.00192742
0.15068	354.947	767.902	0.212875				0.212875	0.212724	0.212272	0.211517	0.210463	0.209111	0.207461	0.205517	0.203282	0.200758	0.197949	0.19486	0.191494	0.187856	0.183952	0.179786	0.175366	0.170697	0.165785	0.160639	0.155264	0.149669	0.143862	0.137851	0.131644	0.12525	0.118679	0.111939	0.10504	0.0979928	0.0908061	0.0834906	0.0760566	0.0685146	0.0608755	0.05315	0.0453491	0.0374838	0.0295654	0.021605	0.0136139	0.00560358	-0.00241474
0.15271	342.554	768.707	0.231758				0.231758	0.23159	0.231083	0.23024	0.229061	0.227549	0.225705	0.223532	0.221033	0.218212	0.215073	0.211621	0.20786	0.203796	0.199435	0.194784	0.189849	0.184637	0.179156	0.173414	0.167419	0.16118	0.154707	0.148007	0.141093	0.133972	0.126656	0.119156	0.111482	0.103646	0.0956583	0.0875315	0.079277	0.0709071	0.0624338	0.0538695	0.0452267	0.036518	0.0277561	0.0189538	0.0101238	0.00127903	-0.00756758
0.15473	332.873	766.151	0.248351				0.248351	0.248165	0.247608	0.24668	0.245384	0.24372	0.241691	0.239301	0.236553	0.233451	0.23	0.226205	0.222071	0.217605	0.212814	0.207704	0.202283	0.196559	0.190542	0.184239	0.177661	0.170817	0.163718	0.156373	0.148795	0.140994	0.132982	0.124771	0.116373	0.107801	0.099068	0.0901867	0.0811705	0.0720328	0.0627874	0.053448	0.0440286	0.0345434	0.0250065	0.0154322	0.00583479	-0.00377135	-0.0133718
0.15675	322.965	760.863	0.264364				0.264364	0.264161	0.263553	0.26254	0.261123	0.259306	0.25709	0.25448	0.251479	0.248092	0.244324	0.240181	0.235669	0.230795	0.225567	0.219992	0.21408	0.207839	0.201279	0.194409	0.187242	0.179786	0.172055	0.16406	0.155812	0.147326	0.138613	0.129687	0.120562	0.111252	0.101771	0.0921343	0.0823558	0.0724509	0.0624346	0.0523226	0.0421301	0.031873	0.021567	0.0112278	0.00087143	-0.00948631	-0.0198295
0.15877	312.789	761.427	0.285082				0.285082	0.284858	0.284184	0.283063	0.281497	0.279486	0.277036	0.274149	0.27083	0.267084	0.262918	0.258338	0.25335	0.247964	0.242187	0.236028	0.229498	0.222606	0.215364	0.207782	0.199873	0.191649	0.183123	0.174308	0.165219	0.15587	0.146275	0.13645	0.12641	0.116171	0.105748	0.0951596	0.0844208	0.0735491	0.0625615	0.0514753	0.040308	0.0290773	0.0178007	0.00649613	-0.00481871	-0.0161259	-0.0274078
0.1608	302.341	766.061	0.310027				0.310027	0.309777	0.309026	0.307775	0.306028	0.303785	0.301052	0.297833	0.294132	0.289956	0.285312	0.280206	0.274648	0.268646	0.26221	0.25535	0.248078	0.240404	0.232343	0.223906	0.215107	0.20596	0.196481	0.186684	0.176586	0.166202	0.15555	0.144646	0.133509	0.122155	0.110605	0.0988757	0.0869868	0.0749573	0.0628066	0.0505545	0.0382207	0.0258252	0.0133879	0.000928941	-0.0115315	-0.0239733	-0.0363763
0.16282	292.732	768.689	0.334502				0.334502	0.334225	0.333394	0.332011	0.330078	0.327598	0.324575	0.321015	0.316923	0.312305	0.307171	0.301527	0.295384	0.288752	0.281641	0.274064	0.266032	0.25756	0.248661	0.239351	0.229643	0.219556	0.209104	0.198306	0.18718	0.175743	0.164016	0.152016	0.139765	0.127282	0.114589	0.101705	0.0886535	0.0754547	0.0621309	0.0487041	0.0351967	0.021631	0.00802939	-0.00558548	-0.0191911	-0.0327649	-0.0462845
0.16484	285.095	770.759	0.358581				0.358581	0.358276	0.357363	0.355844	0.35372	0.350995	0.347675	0.343764	0.33927	0.334199	0.328561	0.322365	0.315621	0.308342	0.300539	0.292226	0.283417	0.274126	0.26437	0.254165	0.243528	0.232478	0.221033	0.209213	0.197037	0.184527	0.171704	0.158589	0.145205	0.131574	0.11772	0.103666	0.0894355	0.0750535	0.060544	0.0459318	0.0312416	0.0164983	0.00172703	-0.0130472	-0.0277993	-0.0425041	-0.0571368
0.16686	275.722	772.001	0.384711				0.384711	0.384376	0.383373	0.381702	0.379368	0.376373	0.372724	0.368426	0.363487	0.357915	0.351721	0.344915	0.337509	0.329515	0.320948	0.311823	0.302155	0.291962	0.281261	0.27007	0.258409	0.246299	0.23376	0.220814	0.207485	0.193794	0.179766	0.165425	0.150797	0.135906	0.120778	0.105441	0.0899201	0.0742427	0.0584361	0.0425279	0.0265456	0.0105172	-0.00552952	-0.0215666	-0.0375662	-0.0535004	-0.0693415
0.16889	267.918	776.47	0.413762				0.413762	0.413394	0.412288	0.410447	0.407875	0.404576	0.400556	0.395822	0.390382	0.384246	0.377426	0.369932	0.361779	0.352982	0.343555	0.333516	0.322882	0.311673	0.299908	0.287609	0.274797	0.261495	0.247728	0.233518	0.218892	0.203877	0.188497	0.172782	0.156759	0.140456	0.123903	0.107129	0.0901645	0.073039	0.0557832	0.0384281	0.0210044	0.00354335	-0.0139241	-0.0313667	-0.0487533	-0.0660531	-0.0832351
0.17091	259.941	783.241	0.446499				0.446499	0.446091	0.44487	0.442836	0.439994	0.436348	0.431906	0.426676	0.420667	0.41389	0.406358	0.398084	0.389083	0.379372	0.368968	0.357891	0.346161	0.333799	0.320827	0.30727	0.293152	0.278499	0.263338	0.247696	0.231602	0.215084	0.198175	0.180903	0.163302	0.145402	0.127237	0.10884	0.0902438	0.0714831	0.0525919	0.0336047	0.0145561	-0.00451902	-0.0235859	-0.0426097	-0.0615558	-0.0803894	-0.0990764
0.17293	252.274	793.324	0.483858				0.483858	0.483406	0.482051	0.479794	0.476642	0.472598	0.467671	0.46187	0.455206	0.447692	0.439341	0.430168	0.420192	0.409431	0.397904	0.385634	0.372644	0.358956	0.344599	0.329597	0.313979	0.297774	0.281013	0.263727	0.245948	0.227709	0.209045	0.18999	0.17058	0.150852	0.130841	0.110586	0.0901245	0.0694943	0.0487343	0.0278832	0.00698006	-0.0139362	-0.0348264	-0.0556515	-0.0763726	-0.096951	-0.117348
0.17495	244.905	798.849	0.518946				0.518946	0.518449	0.516962	0.514485	0.511024	0.506586	0.501179	0.494813	0.487501	0.479257	0.470096	0.460035	0.449095	0.437296	0.42466	0.411213	0.396978	0.381985	0.366261	0.349836	0.332742	0.315012	0.296679	0.277779	0.258347	0.238422	0.21804	0.197241	0.176065	0.154553	0.132744	0.110682	0.0884083	0.0659653	0.0433961	0.0207439	-0.00194795	-0.0246361	-0.0472771	-0.0698277	-0.0922447	-0.114485	-0.136507
0.17698	237.606	804.106	0.555772				0.555772	0.555228	0.553597	0.550883	0.54709	0.542227	0.536302	0.529328	0.521318	0.512287	0.502254	0.491237	0.479259	0.466343	0.452514	0.4378	0.422229	0.405831	0.388639	0.370686	0.352007	0.33264	0.312621	0.291991	0.270789	0.249057	0.226838	0.204175	0.181112	0.157694	0.133968	0.10998	0.0857761	0.0614046	0.0369129	0.012349	-0.0122391	-0.0368033	-0.0612954	-0.0856675	-0.109872	-0.133861	-0.157589
0.179	230.991	813.328	0.597843				0.597843	0.597244	0.59545	0.592463	0.588291	0.58294	0.576422	0.56875	0.559939	0.550007	0.538974	0.526862	0.513695	0.499499	0.484303	0.468138	0.451035	0.433029	0.414156	0.394454	0.373962	0.352721	0.330774	0.308165	0.284939	0.261142	0.236822	0.212029	0.18681	0.161218	0.135303	0.109117	0.0827122	0.0561421	0.0294595	0.00271798	-0.024029	-0.0507279	-0.0773252	-0.103768	-0.130002	-0.155977	-0.181639
0.18102	224.472	825.063	0.64489				0.64489	0.64423	0.64225	0.638956	0.634353	0.628451	0.621262	0.612801	0.603086	0.592135	0.579972	0.566621	0.55211	0.536469	0.519729	0.501925	0.483093	0.463272	0.442502	0.420826	0.398288	0.374935	0.350814	0.325975	0.300468	0.274346	0.247663	0.220472	0.192829	0.164792	0.136417	0.107763	0.0788888	0.0498526	0.0207144	-0.0084663	-0.0376297	-0.0667159	-0.0956656	-0.124419	-0.152918	-0.181104	-0.208919
0.18304	217.798	833.034	0.690598				0.690598	0.689875	0.687708	0.684101	0.679062	0.672601	0.664732	0.655471	0.644838	0.632854	0.619546	0.604941	0.589069	0.571964	0.553662	0.5342	0.51362	0.491965	0.469279	0.445612	0.421011	0.395529	0.369218	0.342135	0.314335	0.285878	0.256821	0.227228	0.197158	0.166676	0.135844	0.104728	0.0733935	0.0419048	0.0103284	-0.0212696	-0.0528231	-0.084266	-0.115532	-0.146557	-0.177275	-0.207621	-0.237533
0.18507	213.704	841.314	0.736265				0.736265	0.735477	0.733115	0.729184	0.723692	0.716651	0.708076	0.697986	0.686402	0.673349	0.658855	0.642951	0.62567	0.607051	0.587132	0.565956	0.543569	0.520019	0.495356	0.469632	0.442904	0.415227	0.386662	0.357269	0.327112	0.296254	0.264762	0.232704	0.200147	0.167163	0.13382	0.100191	0.0663477	0.0323623	-0.00169243	-0.0357435	-0.0697181	-0.103543	-0.137147	-0.170457	-0.203403	-0.235913	-0.267918
0.18709	208.864	853.279	0.789528				0.789528	0.788665	0.786076	0.781768	0.77575	0.768036	0.758641	0.747588	0.734899	0.720602	0.70473	0.687316	0.668398	0.648019	0.626222	0.603056	0.578571	0.55282	0.52586	0.497749	0.46855	0.438326	0.407144	0.375071	0.342177	0.308535	0.274219	0.239302	0.203862	0.167976	0.131723	0.0951815	0.0584319	0.0215545	-0.0153701	-0.052261	-0.0890376	-0.12562	-0.161927	-0.19788	-0.2334	-0.268409	-0.302832
0.18911	202.376	864.637	0.847008				0.847008	0.846061	0.843224	0.838502	0.831907	0.823453	0.813158	0.801046	0.787144	0.771483	0.754098	0.735027	0.714314	0.692005	0.668149	0.6428	0.616015	0.587853	0.558377	0.527654	0.495751	0.46274	0.428696	0.393693	0.35781	0.321128	0.283728	0.245695	0.207112	0.168066	0.128645	0.0889357	0.0490281	0.009011	-0.0310263	-0.0709942	-0.110804	-0.150365	-0.189591	-0.228393	-0.266684	-0.30438	-0.341395
0.19113	197.449	876.336	0.905968				0.905968	0.904934	0.901834	0.896676	0.88947	0.880235	0.86899	0.855761	0.840579	0.823478	0.804497	0.78368	0.761074	0.73673	0.710705	0.683057	0.65385	0.623151	0.591029	0.557558	0.522814	0.486877	0.449828	0.411753	0.372737	0.332871	0.292245	0.250952	0.209086	0.166742	0.124018	0.081011	0.0378189	-0.00545949	-0.0487254	-0.0918801	-0.134825	-0.177462	-0.219694	-0.261425	-0.302559	-0.343002	-0.382662
0.19316	192.437	888.797	0.9694				0.9694	0.96827	0.964882	0.959245	0.951372	0.94128	0.928994	0.914541	0.897957	0.879279	0.858551	0.835821	0.811143	0.784573	0.756175	0.726013	0.694159	0.660686	0.625673	0.589201	0.551355	0.512224	0.471899	0.430473	0.388044	0.34471	0.300572	0.255734	0.210299	0.164374	0.118066	0.0714829	0.0247328	-0.0220749	-0.0688312	-0.115427	-0.161754	-0.207703	-0.253168	-0.298043	-0.342224	-0.385606	-0.428089
0.19518	188.318	901.546	1.03507				1.03507	1.03384	1.03014	1.024	1.01542	1.00442	0.991025	0.975275	0.957203	0.936853	0.914272	0.889516	0.862641	0.833713	0.802801	0.769977	0.735321	0.698914	0.660843	0.621199	0.580077	0.537573	0.49379	0.448832	0.402805	0.355819	0.307986	0.25942	0.210236	0.160552	0.110486	0.0601567	0.00968431	-0.0408112	-0.0912095	-0.141391	-0.191235	-0.240625	-0.289441	-0.337569	-0.384893	-0.431301	-0.476682
0.1972	183.55	910.321	1.09907				1.09907	1.09773	1.09373	1.08707	1.07777	1.06585	1.05134	1.03427	1.01469	0.992646	0.968189	0.941379	0.912282	0.880968	0.847513	0.811999	0.774511	0.735142	0.693986	0.651144	0.606719	0.56082	0.513558	0.465049	0.415409	0.36476	0.313224	0.260928	0.207997	0.154561	0.100749	0.0466924	-0.00747765	-0.0616295	-0.115632	-0.169353	-0.222662	-0.275431	-0.32753	-0.378833	-0.429216	-0.478556	-0.526733
0.19922	179.18	922.477	1.17083				1.17083	1.16938	1.16503	1.15779	1.14767	1.13471	1.11894	1.10039	1.07912	1.05516	1.02859	0.999472	0.967872	0.933872	0.897556	0.859014	0.818342	0.77564	0.731015	0.684576	0.63644	0.586725	0.535556	0.483058	0.429362	0.374601	0.318912	0.262431	0.205299	0.147659	0.089652	0.0314229	-0.0268842	-0.0851246	-0.143154	-0.200828	-0.258004	-0.314541	-0.370297	-0.425135	-0.478919	-0.531514	-0.582792
0.20125	176.045	938.715	1.25107				1.25107	1.24948	1.24474	1.23684	1.22582	1.21169	1.19449	1.17428	1.15109	1.12498	1.09603	1.06431	1.02989	0.992869	0.953333	0.911384	0.867128	0.820678	0.77215	0.721669	0.669361	0.615359	0.5598	0.502824	0.444575	0.385202	0.324853	0.263683	0.201845	0.139496	0.0767938	0.0138976	-0.0490338	-0.111841	-0.174365	-0.236448	-0.297933	-0.358663	-0.418486	-0.47725	-0.534806	-0.591008	-0.645715
0.20327	173.147	951.494	1.32882				1.32882	1.3271	1.32196	1.31341	1.30146	1.28616	1.26753	1.24563	1.22051	1.19225	1.1609	1.12656	1.08931	1.04925	1.00647	0.961103	0.913251	0.86304	0.810602	0.756071	0.699587	0.641298	0.581352	0.519906	0.457118	0.393149	0.328165	0.262334	0.195825	0.128811	0.0614643	-0.00604103	-0.0735308	-0.140831	-0.207767	-0.274167	-0.339859	-0.404673	-0.468443	-0.531003	-0.592193	-0.651853	-0.70983
0.20529	168.903	965.535	1.41491				1.41491	1.41305	1.40746	1.39817	1.3852	1.36858	1.34835	1.32458	1.29732	1.26664	1.23262	1.19536	1.15495	1.1115	1.06512	1.01594	0.96408	0.909683	0.852891	0.793852	0.732723	0.669665	0.604843	0.538428	0.470595	0.401523	0.331393	0.260391	0.188703	0.116518	0.0440267	-0.0285809	-0.101113	-0.173379	-0.245189	-0.316353	-0.386683	-0.455996	-0.524107	-0.590839	-0.656014	-0.719462	-0.781015
0.20732	164.417	982.986	1.51224				1.51224	1.51021	1.50412	1.49399	1.47985	1.46174	1.4397	1.4138	1.38409	1.35067	1.31362	1.27305	1.22905	1.18176	1.13129	1.07778	1.02138	0.962229	0.900499	0.83635	0.769955	0.701492	0.631145	0.559103	0.485559	0.410711	0.33476	0.25791	0.180367	0.10234	0.024038	-0.0543285	-0.132549	-0.210414	-0.287713	-0.36424	-0.439789	-0.514156	-0.587143	-0.658552	-0.728193	-0.795878	-0.861426
0.20934	161.935	996.919	1.60357				1.60357	1.60137	1.59479	1.58384	1.56856	1.54898	1.52516	1.49716	1.46506	1.42895	1.38893	1.3451	1.29759	1.24653	1.19206	1.13432	1.07347	1.00968	0.943133	0.874	0.802474	0.72875	0.653031	0.575523	0.49644	0.415997	0.334415	0.251917	0.168729	0.0850795	0.00119678	-0.0826892	-0.166349	-0.249553	-0.332073	-0.413685	-0.494163	-0.573288	-0.650844	-0.726617	-0.800401	-0.871993	-0.941196
0.21136	157.51	1013.15	1.70758				1.70758	1.7052	1.69805	1.68617	1.66958	1.64833	1.62248	1.5921	1.55727	1.5181	1.47469	1.42717	1.37566	1.32031	1.26127	1.19872	1.13281	1.06375	0.991715	0.916913	0.839551	0.759846	0.67802	0.594301	0.508924	0.422125	0.334149	0.245239	0.155645	0.065617	-0.0245946	-0.114738	-0.20456	-0.293812	-0.382243	-0.469608	-0.555661	-0.640164	-0.722879	-0.803577	-0.882032	-0.958024	-1.03134
0.21338	154.872	1033.23	1.82091				1.82091	1.81832	1.81055	1.79764	1.77961	1.75652	1.72843	1.69542	1.65759	1.61505	1.56791	1.51631	1.46039	1.40032	1.33627	1.26841	1.19695	1.12208	1.04401	0.962981	0.879209	0.792936	0.704407	0.613873	0.521593	0.42783	0.332849	0.236921	0.140319	0.0433177	-0.0538067	-0.150778	-0.24732	-0.343159	-0.438021	-0.531638	-0.623741	-0.714071	-0.802368	-0.888383	-0.971871	-1.05259	-1.13032
0.21541	151.989	1053.01	1.93997				1.93997	1.93716	1.92873	1.91471	1.89514	1.87007	1.83958	1.80376	1.76271	1.71654	1.6654	1.60943	1.5488	1.48367	1.41424	1.34071	1.2633	1.18222	1.09771	1.01003	0.919408	0.826125	0.730447	0.632651	0.53302	0.431844	0.329416	0.226033	0.121995	0.0176027	-0.0868404	-0.191032	-0.294669	-0.397452	-0.499083	-0.599267	-0.697713	-0.794137	-0.888257	-0.979803	-1.06851	-1.15411	-1.23637
0.21743	149.013	1066.26	2.05004				2.05004	2.04702	2.03794	2.02285	2.00178	1.97479	1.94198	1.90342	1.85924	1.80958	1.75456	1.69436	1.62916	1.55915	1.48453	1.40552	1.32236	1.2353	1.14458	1.05049	0.953292	0.853278	0.750744	0.645992	0.539332	0.431078	0.321551	0.211075	0.0999745	-0.0114211	-0.122783	-0.233782	-0.344091	-0.453383	-0.561335	-0.66763	-0.771952	-0.873994	-0.973455	-1.07004	-1.16346	-1.25345	-1.33973
0.21945	146.718	1077.51	2.15872				2.15872	2.15547	2.14574	2.12955	2.10695	2.07801	2.04282	2.00148	1.95411	1.90087	1.84191	1.77741	1.70755	1.63256	1.55266	1.46808	1.37909	1.28594	1.18893	1.08834	0.984474	0.877645	0.768176	0.656395	0.542639	0.42725	0.310576	0.192966	0.0747767	-0.0436381	-0.161922	-0.279718	-0.396672	-0.512433	-0.626652	-0.738985	-0.849095	-0.956649	-1.06133	-1.16281	-1.26079	-1.35498	-1.44509
0.22147	143.63	1096.54	2.29252				2.29252	2.28901	2.27848	2.26097	2.23653	2.20523	2.16718	2.12248	2.07128	2.01373	1.95001	1.88032	1.80486	1.72387	1.63759	1.5463	1.45027	1.34979	1.24518	1.13675	1.02483	0.909778	0.791936	0.671666	0.549338	0.425326	0.30001	0.173775	0.0470078	-0.0799037	-0.20657	-0.332604	-0.457618	-0.58123	-0.70306	-0.822736	-0.93989	-1.05416	-1.16521	-1.27268	-1.37625	-1.4756	-1.57043
0.2235	140.496	1113.77	2.42853				2.42853	2.42474	2.41338	2.39449	2.36813	2.33437	2.29333	2.24513	2.18992	2.12788	2.0592	1.98409	1.90278	1.81554	1.72263	1.62434	1.52099	1.41288	1.30037	1.1838	1.06353	0.939944	0.813423	0.684364	0.553169	0.420247	0.286014	0.150888	0.0152907	-0.120354	-0.255623	-0.390095	-0.523348	-0.654968	-0.784544	-0.911672	-1.03595	-1.157	-1.27444	-1.3879	-1.49703	-1.60148	-1.70094
0.22552	137.744	1130.13	2.56698				2.56698	2.5629	2.55068	2.53035	2.50198	2.46566	2.4215	2.36965	2.31027	2.24354	2.16969	2.08894	2.00155	1.90781	1.808	1.70244	1.59147	1.47545	1.35474	1.22972	1.1008	0.968372	0.832872	0.694724	0.554369	0.412251	0.268824	0.124543	-0.0201343	-0.164748	-0.308837	-0.451946	-0.593618	-0.733403	-0.870858	-1.00555	-1.13704	-1.26492	-1.38878	-1.50822	-1.62287	-1.73237	-1.83636
0.22754	135.299	1150.22	2.7206				2.7206	2.7162	2.70301	2.68108	2.65047	2.61129	2.56367	2.50774	2.44371	2.37177	2.29216	2.20513	2.11097	2.00998	1.90249	1.78885	1.66941	1.54458	1.41475	1.28034	1.14179	0.999546	0.854069	0.705829	0.555306	0.402986	0.249363	0.0949332	-0.0598039	-0.214348	-0.368198	-0.520857	-0.671831	-0.820632	-0.966778	-1.1098	-1.24922	-1.38461	-1.51552	-1.64152	-1.76222	-1.87721	-1.98613
0.22956	133.523	1169.57	2.87716				2.87716	2.87242	2.85822	2.83462	2.80168	2.75951	2.70826	2.64809	2.57921	2.50182	2.41621	2.32263	2.22141	2.11287	1.99738	1.87531	1.74706	1.61307	1.47376	1.3296	1.18106	1.02863	0.872812	0.714123	0.553082	0.39022	0.226073	0.0611819	-0.103911	-0.268661	-0.432527	-0.594969	-0.755452	-0.913447	-1.06843	-1.2199	-1.36736	-1.51031	-1.64828	-1.78083	-1.90752	-2.02793	-2.14165
0.23159	130.829	1187.16	3.03864				3.03864	3.03355	3.01829	2.99292	2.95752	2.9122	2.85713	2.79248	2.71848	2.63536	2.54341	2.44294	2.33429	2.21781	2.09389	1.96296	1.82546	1.68183	1.53257	1.37817	1.21916	1.05606	0.889416	0.719795	0.547762	0.373893	0.198771	0.0229835	-0.152881	-0.328234	-0.502486	-0.675055	-0.845361	-1.01283	-1.17691	-1.33705	-1.4927	-1.64336	-1.7885	-1.92765	-2.06034	-2.18613	-2.30459
0.23361	129.096	1207.52	3.21185				3.21185	3.20638	3.18997	3.16268	3.12461	3.07588	3.01667	2.94717	2.86762	2.77829	2.67949	2.57155	2.45484	2.32976	2.19674	2.05623	1.9087	1.75467	1.59466	1.4292	1.25887	1.08425	0.905938	0.724531	0.540655	0.354934	0.168004	-0.0194996	-0.206937	-0.393668	-0.579057	-0.762471	-0.943286	-1.12088	-1.29466	-1.46402	-1.62839	-1.78721	-1.93993	-2.08604	-2.22503	-2.35644	-2.47981
0.23563	127.291	1226.96	3.38987				3.38987	3.38399	3.36637	3.33708	3.2962	3.24389	3.18033	3.10574	3.02037	2.92452	2.81853	2.70276	2.57761	2.44352	2.30096	2.15041	1.9924	1.82748	1.65622	1.47922	1.29708	1.11045	0.919959	0.72628	0.530081	0.332043	0.132854	-0.0667971	-0.266216	-0.464711	-0.661595	-0.856183	-1.0478	-1.23578	-1.41948	-1.59825	-1.77148	-1.93856	-2.09892	-2.25199	-2.39726	-2.5342	-2.66236
0.23765	124.939	1240.71	3.55898				3.55898	3.5527	3.53388	3.50259	3.45895	3.40309	3.33523	3.2556	3.16448	3.0622	2.9491	2.82561	2.69214	2.54917	2.3972	2.23678	2.06846	1.89284	1.71055	1.52221	1.32851	1.13012	0.927736	0.722082	0.51388	0.303864	0.0927767	-0.118638	-0.329635	-0.539468	-0.747398	-0.95269	-1.15462	-1.35248	-1.54556	-1.73319	-1.9147	-2.08946	-2.25684	-2.41626	-2.56715	-2.70899	-2.84126
0.23968	121.132	1259.35	3.75623				3.75623	3.74949	3.72929	3.69571	3.64886	3.58891	3.51608	3.43063	3.33287	3.22314	3.10185	2.96942	2.82633	2.6731	2.51028	2.33844	2.15821	1.97024	1.77519	1.57377	1.3667	1.15473	0.938608	0.71912	0.497051	0.273199	0.0483652	-0.176642	-0.401015	-0.623949	-0.844643	-1.0623	-1.27615	-1.48542	-1.68936	-1.88723	-2.07833	-2.26197	-2.43749	-2.60427	-2.76169	-2.9092	-3.04627
0.2417	118.396	1277.09	3.95435				3.95435	3.94714	3.92551	3.88956	3.83941	3.77525	3.6973	3.60586	3.50126	3.38388	3.25415	3.11254	2.95957	2.7958	2.62182	2.43827	2.24582	2.04518	1.83707	1.62225	1.40151	1.17566	0.945515	0.711919	0.475726	0.237795	-0.00100311	-0.239798	-0.477717	-0.713893	-0.947463	-1.17757	-1.40339	-1.62408	-1.83884	-2.04689	-2.24747	-2.43985	-2.62332	-2.79721	-2.9609	-3.11378	-3.25529
0.24372	116.938	1294.63	4.15523				4.15523	4.14752	4.12442	4.08601	4.03243	3.96389	3.88064	3.78298	3.67129	3.54597	3.40749	3.25637	3.09315	2.91846	2.73294	2.53728	2.33219	2.11846	1.89686	1.66822	1.43339	1.19324	0.94866	0.70056	0.449861	0.197491	-0.0556106	-0.308506	-0.560257	-0.809928	-1.05659	-1.29934	-1.53726	-1.76948	-1.99513	-2.21337	-2.4234	-2.62444	-2.81573	-2.99658	-3.16631	-3.32428	-3.46992
0.24574	115.912	1312.26	4.36277				4.36277	4.35454	4.32988	4.28888	4.2317	4.15855	4.06972	3.96552	3.84637	3.7127	3.56503	3.4039	3.22993	3.04378	2.84614	2.63776	2.41942	2.19196	1.95623	1.71312	1.46355	1.20845	0.948791	0.685554	0.41973	0.152323	-0.115659	-0.383205	-0.649305	-0.912955	-1.17316	-1.42894	-1.67933	-1.92338	-2.16017	-2.38882	-2.60845	-2.81823	-3.01739	-3.20516	-3.38084	-3.54376	-3.69331
0.24777	114.919	1332.15	4.58742				4.58742	4.57862	4.55226	4.50844	4.44732	4.36915	4.27422	4.1629	4.03561	3.89283	3.73513	3.5631	3.37741	3.17875	2.96791	2.74568	2.51293	2.27053	2.01942	1.76057	1.49496	1.22362	0.947592	0.667925	0.385696	0.101987	-0.182112	-0.465514	-0.747129	-1.02588	-1.30069	-1.57052	-1.83432	-2.09109	-2.33983	-2.57961	-2.80948	-3.02858	-3.23607	-3.43114	-3.61305	-3.7811	-3.93465
0.24979	113.227	1349.69	4.81372				4.81372	4.80434	4.77622	4.72949	4.66432	4.58097	4.47976	4.36108	4.2254	4.07325	3.90523	3.72197	3.52421	3.31271	3.08829	2.85184	2.60426	2.34654	2.07967	1.80468	1.52267	1.23472	0.941951	0.645513	0.346559	0.0462535	-0.254232	-0.553727	-0.851063	-1.14508	-1.43463	-1.7186	-1.99586	-2.26534	-2.52599	-2.77679	-3.01677	-3.24498	-3.46055	-3.66262	-3.85042	-4.02321	-4.18031
0.25181	110.163	1365.32	5.04649				5.04649	5.0365	5.00655	4.95676	4.88734	4.79856	4.69077	4.56439	4.41993	4.25796	4.07912	3.88412	3.67373	3.44879	3.21018	2.95886	2.69582	2.42209	2.13877	1.84698	1.54787	1.24262	0.932458	0.618598	0.302287	-0.0152211	-0.332669	-0.648799	-0.962359	-1.27211	-1.57681	-1.87527	-2.16631	-2.44875	-2.7215	-2.98347	-3.23361	-3.47095	-3.69454	-3.90348	-4.09697	-4.27422	-4.43454
0.25383	108.552	1385.21	5.29964				5.29964	5.28897	5.25701	5.20389	5.12983	5.03511	4.92012	4.78533	4.63127	4.45857	4.26793	4.0601	3.83593	3.59631	3.34222	3.07468	2.79475	2.50358	2.20233	1.89222	1.57448	1.25041	0.921308	0.588495	0.253313	-0.0828892	-0.418757	-0.75294	-1.08409	-1.41088	-1.73199	-2.04612	-2.35202	-2.64845	-2.93422	-3.20818	-3.46923	-3.7163	-3.94842	-4.16465	-4.3641	-4.546	-4.70959
0.25586	108.063	1403.86	5.55325				5.55325	5.54189	5.50787	5.45132	5.37247	5.27165	5.14926	5.00582	4.8419	4.65817	4.4554	4.2344	3.99608	3.74142	3.47145	3.18729	2.89009	2.58106	2.26149	1.93266	1.59592	1.25266	0.90428	0.552197	0.197856	-0.157295	-0.511802	-0.864216	-1.2131	-1.55701	-1.89456	-2.22436	-2.54506	-2.85536	-3.15397	-3.43968	-3.71133	-3.96779	-4.20803	-4.43106	-4.63596	-4.8219	-4.98811
0.25788	107.671	1420.49	5.80599				5.80599	5.79392	5.75779	5.69773	5.614	5.50694	5.377	5.22472	5.05073	4.85576	4.64061	4.40618	4.15344	3.88344	3.59731	3.29623	2.98146	2.6543	2.31611	1.9683	1.61231	1.24962	0.881734	0.510188	0.136523	-0.23771	-0.610955	-0.981662	-1.34829	-1.70932	-2.06324	-2.40859	-2.74393	-3.06788	-3.37907	-3.67623	-3.95811	-4.22355	-4.47143	-4.70074	-4.91052	-5.09989	-5.26808
0.2599	106.352	1441.03	6.08978				6.08978	6.07693	6.03844	5.97446	5.88526	5.77123	5.63284	5.47068	5.28543	5.07788	4.8489	4.59945	4.33059	4.04346	3.73926	3.41928	3.08487	2.73744	2.37846	2.00944	1.63194	1.24756	0.857905	0.464633	0.0693996	-0.326126	-0.720276	-1.11139	-1.49781	-1.8779	-2.25008	-2.61275	-2.96441	-3.30355	-3.62874	-3.93863	-4.23189	-4.50729	-4.76367	-4.99995	-5.21512	-5.40829	-5.57863
0.26193	104.081	1454.76	6.35762				6.35762	6.34399	6.30317	6.23533	6.14077	6.01988	5.87319	5.70133	5.50503	5.28513	5.04257	4.7784	4.49375	4.18984	3.86796	3.52951	3.17593	2.80874	2.4295	2.03985	1.64146	1.23603	0.825307	0.411043	-0.00498229	-0.420987	-0.835186	-1.24581	-1.65109	-2.04929	-2.43871	-2.81767	-3.18456	-3.5378	-3.87587	-4.19733	-4.50079	-4.78497	-5.04863	-5.29066	-5.51	-5.70573	-5.877
0.26395	103.197	1464.05	6.60538				6.60538	6.59101	6.54794	6.47638	6.37662	6.24911	6.09439	5.91315	5.70617	5.47435	5.21871	4.94035	4.64048	4.32041	3.98154	3.62534	3.25336	2.86722	2.46859	2.05923	1.64089	1.21542	0.784655	0.350474	-0.0852313	-0.520566	-0.953635	-1.38255	-1.80545	-2.22049	-2.62587	-3.01982	-3.40062	-3.76662	-4.11622	-4.44791	-4.76023	-5.05184	-5.32146	-5.56791	-5.79013	-5.98714	-6.1581
0.26597	102.078	1479	6.89032				6.89032	6.87509	6.82948	6.75368	6.64804	6.51301	6.3492	6.15733	5.93824	5.69291	5.42242	5.12797	4.81085	4.47247	4.11432	3.73799	3.34514	2.9375	2.51688	2.08514	1.64418	1.19595	0.742443	0.285651	-0.172403	-0.629696	-1.08421	-1.53392	-1.97686	-2.41106	-2.83461	-3.24563	-3.6423	-4.02287	-4.38567	-4.72908	-5.05159	-5.35178	-5.62831	-5.87997	-6.10564	-6.30433	-6.47515
0.26799	100.243	1494.19	7.18988				7.18988	7.17375	7.12543	7.04514	6.93324	6.79023	6.61675	6.41358	6.18163	5.92195	5.6357	5.32415	4.98872	4.63091	4.25231	3.85464	3.43967	3.00926	2.56536	2.10994	1.64506	1.17279	0.695261	0.214614	-0.266997	-0.74741	-1.22447	-1.69603	-2.15999	-2.61425	-3.05678	-3.4856	-3.89878	-4.29446	-4.67088	-5.02633	-5.35924	-5.66809	-5.95152	-6.20824	-6.4371	-6.63708	-6.80728
0.27002	99.147	1509.89	7.4995				7.4995	7.48242	7.43125	7.34624	7.22776	7.07635	6.89272	6.67768	6.43223	6.15748	5.85467	5.5252	5.17057	4.79237	4.39235	3.97232	3.5342	3.07997	2.61172	2.13157	1.64171	1.14437	0.641818	0.136343	-0.369753	-0.874164	-1.37459	-1.86876	-2.35442	-2.82935	-3.29139	-3.73844	-4.16846	-4.57949	-4.96967	-5.3372	-5.68042	-5.99777	-6.28779	-6.54918	-6.78073	-6.98139	-7.15025
0.27204	98.2194	1520.94	7.79204				7.79204	7.77402	7.72006	7.63041	7.50548	7.34585	7.15225	6.92558	6.6669	6.37738	6.05838	5.71137	5.33796	4.93986	4.51892	4.07709	3.61641	3.13901	2.64709	2.14293	1.62887	1.10728	0.580563	0.0511647	-0.47847	-1.00589	-1.52866	-2.04437	-2.55062	-3.04508	-3.52546	-3.98954	-4.43517	-4.8603	-5.26295	-5.64127	-5.99351	-6.31804	-6.61335	-6.87809	-7.11103	-7.31109	-7.47734
0.27406	97.1309	1531.21	8.09014				8.09014	8.07116	8.01431	7.91984	7.78822	7.62005	7.41612	7.17739	6.90498	6.60017	6.26439	5.89922	5.50636	5.08766	4.64509	4.18073	3.69674	3.19541	2.67908	2.15019	1.6112	1.06465	0.513107	-0.0408443	-0.594604	-1.14557	-1.69117	-2.22883	-2.75603	-3.27029	-3.76921	-4.25045	-4.71174	-5.15092	-5.56593	-5.95482	-6.31576	-6.64708	-6.9472	-7.21472	-7.44838	-7.6471	-7.80993
0.27608	95.9291	1545.4	8.42069				8.42069	8.40065	8.34059	8.24082	8.10181	7.92422	7.7089	7.45687	7.16932	6.84764	6.49335	6.10815	5.69385	5.25244	4.78602	4.29681	3.78714	3.25943	2.71621	2.16005	1.5936	1.01957	0.440675	-0.140313	-0.720633	-1.29752	-1.86823	-2.43005	-2.98029	-3.51634	-4.03564	-4.53573	-5.01422	-5.46884	-5.89741	-6.2979	-6.6684	-7.00714	-7.31252	-7.58308	-7.81752	-8.01474	-8.1738
0.27811	94.6659	1560.87	8.77121				8.77121	8.75002	8.68655	8.5811	8.43419	8.24652	8.01901	7.75274	7.44901	7.10929	6.73522	6.3286	5.8914	5.42573	4.93384	4.41812	3.88104	3.32521	2.75331	2.16811	1.57243	0.969156	0.361196	-0.248509	-0.857014	-1.46138	-2.05868	-2.64603	-3.2206	-3.77961	-4.32035	-4.84021	-5.33669	-5.80738	-6.25001	-6.66243	-7.04267	-7.38887	-7.69937	-7.97266	-8.20743	-8.40254	-8.55704
0.28013	94.3835	1575.12	9.11832				9.11832	9.09597	9.02903	8.91782	8.76289	8.565	8.32512	8.04442	7.72429	7.36628	6.97217	6.54387	6.08349	5.59329	5.07567	4.53316	3.96843	3.38424	2.78346	2.16903	1.54397	0.911346	0.27425	-0.364191	-1.00085	-1.63259	-2.25634	-2.86902	-3.46764	-4.04926	-4.61102	-5.15018	-5.66409	-6.15023	-6.60623	-7.02983	-7.41897	-7.77173	-8.0864	-8.36142	-8.59545	-8.78734	-8.93615
0.28215	93.8695	1582.37	9.43341				9.43341	9.40995	9.3397	9.22299	9.06041	8.85277	8.6011	8.30665	7.97089	7.59548	7.1823	6.7334	6.25101	5.73754	5.19552	4.62767	4.0368	3.42585	2.79787	2.15597	1.50335	0.843247	0.178954	-0.486229	-1.14899	-1.80604	-2.45411	-3.08998	-3.71047	-4.31251	-4.8931	-5.44936	-5.97851	-6.47794	-6.94514	-7.3778	-7.77377	-8.13107	-8.44794	-8.72279	-8.95426	-9.14119	-9.28266
0.28417	92.3221	1592.57	9.78307				9.78307	9.7584	9.68449	9.56172	9.39072	9.17234	8.90769	8.5981	8.24513	7.85057	7.4164	6.94482	6.4382	5.8991	5.33024	4.73448	4.11485	3.47445	2.81653	2.1444	1.46145	0.771121	0.0769072	-0.617695	-1.30918	-1.99406	-2.66888	-3.33024	-3.9748	-4.5993	-5.2006	-5.77567	-6.32159	-6.83563	-7.31518	-7.75782	-8.16133	-8.52366	-8.84299	-9.11772	-9.34644	-9.52801	-9.66151
0.2862	90.5466	1605.29	10.1629				10.1629	10.1369	10.059	9.9297	9.74953	9.51948	9.24072	8.91466	8.54299	8.1276	7.67062	7.17439	6.64145	6.07452	5.47651	4.85047	4.19961	3.52726	2.83686	2.13194	1.41612	0.693044	-0.0335749	-0.760022	-1.48258	-2.19755	-2.90128	-3.59016	-4.26066	-4.90937	-5.53295	-6.12822	-6.69213	-7.2218	-7.71451	-8.16774	-8.57918	-8.94671	-9.26846	-9.54279	-9.76828	-9.94378	-10.0684
0.28822	90.2454	1618.44	10.5457				10.5457	10.5183	10.4363	10.3002	10.1107	9.86863	9.57537	9.23243	8.84157	8.40482	7.92446	7.40297	6.84307	6.24765	5.6198	4.96279	4.28003	3.57505	2.85152	2.1132	1.3639	0.607529	-0.151996	-0.910733	-1.66474	-2.41011	-3.14298	-3.85953	-4.55605	-5.22893	-5.87467	-6.48993	-7.0715	-7.61637	-8.12172	-8.58492	-9.00357	-9.37549	-9.69875	-9.97168	-10.1929	-10.3611	-10.4757
0.29024	89.1521	1623.91	10.891				10.891	10.8623	10.7765	10.634	10.4355	10.1821	9.87507	9.5161	9.10705	8.65007	8.14757	7.60219	7.01681	6.3945	5.73853	5.05237	4.33962	3.60403	2.84947	2.07992	1.29942	0.512084	-0.277948	-1.06652	-1.84947	-2.6227	-3.38212	-4.12374	-4.84366	-5.53809	-6.20337	-6.83601	-7.43268	-7.99022	-8.50572	-8.97646	-9.39995	-9.77398	-10.0966	-10.366	-10.5809	-10.7401	-10.8428
0.29226	87.9375	1626.09	11.2222				11.2222	11.1922	11.1026	10.9537	10.7463	10.4816	10.161	9.78611	9.35903	8.88202	8.35761	7.7886	7.17803	6.52916	5.84545	5.13055	4.38827	3.62257	2.83754	2.03737	1.22633	0.408748	-0.411017	-1.22859	-2.03961	-2.83974	-3.62472	-4.39036	-5.13257	-5.84739	-6.53101	-7.17978	-7.79024	-8.35912	-8.88341	-9.36029	-9.78722	-10.1619	-10.4824	-10.747	-10.9541	-11.1029	-11.1924
0.29429	86.7738	1632.43	11.5935				11.5935	11.5621	11.4682	11.3123	11.0951	10.8179	10.4821	10.0897	9.64267	9.14346	8.59478	7.9996	7.36114	6.68285	5.96841	5.22167	4.44668	3.64763	2.82885	1.99476	1.14988	0.298776	-0.553943	-1.40367	-2.24579	-3.07577	-3.88911	-4.6814	-5.44836	-6.18585	-6.88987	-7.55661	-8.18247	-8.76405	-9.29822	-9.78208	-10.213	-10.5887	-10.9071	-11.1665	-11.3654	-11.5029	-11.5781
0.29631	86.6034	1641	11.9825				11.9825	11.9497	11.8513	11.6878	11.4603	11.1699	10.8183	10.4073	9.93926	9.41668	8.84245	8.21972	7.5519	6.84266	6.09589	5.31568	4.50632	3.67224	2.81802	1.94834	1.06798	0.181754	-0.705466	-1.58882	-2.46345	-3.32458	-4.16746	-4.9875	-5.78017	-6.54114	-7.26623	-7.95147	-8.59309	-9.18758	-9.73168	-10.2224	-10.657	-11.0332	-11.3489	-11.6024	-11.7921	-11.9173	-11.977
0.29833	85.4368	1645.91	12.3607				12.3607	12.3264	12.2235	12.0526	11.8147	11.5112	11.1436	10.7141	10.225	9.67907	9.07931	8.42907	7.73197	6.99188	6.21291	5.3994	4.55587	3.687	2.79764	1.89273	0.977286	0.0564121	-0.864775	-1.78115	-2.68763	-3.57916	-4.4508	-5.29768	-6.11512	-6.89855	-7.64362	-8.3462	-9.00237	-9.6085	-10.1612	-10.6574	-11.0943	-11.4696	-11.7811	-12.0271	-12.2062	-12.3175	-12.3602
0.30035	84.7312	1648.93	12.7293				12.7293	12.6934	12.586	12.4077	12.1594	11.8426	11.4591	11.011	10.5009	9.93156	9.30627	8.62853	7.90216	7.13127	6.32018	5.47348	4.59593	3.69249	2.76823	1.82837	0.878211	-0.0768992	-1.03158	-1.98044	-2.91814	-3.8394	-4.73902	-5.61193	-6.45322	-7.25814	-8.02216	-8.74097	-9.41052	-10.027	-10.587	-11.0874	-11.5253	-11.8982	-12.204	-12.4411	-12.6081	-12.704	-12.7283
0.30238	83.7527	1652.57	13.1155				13.1155	13.078	12.9659	12.7797	12.5205	12.1897	11.7894	11.3217	10.7893	10.1953	9.5431	8.83637	8.07916	7.27581	6.4309	5.54926	4.63591	3.69609	2.73516	1.75861	0.772008	-0.219001	-1.20876	-2.19161	-3.16195	-4.11423	-5.043	-5.94297	-6.809	-7.63613	-8.41964	-9.15507	-9.8382	-10.4651	-11.0323	-11.5364	-11.9747	-12.3445	-12.6439	-12.871	-13.0246	-13.1038	-13.1082
0.3044	82.5516	1657.47	13.5218				13.5218	13.4827	13.3655	13.171	12.9002	12.5548	12.1366	11.6482	11.0924	10.4724	9.7918	9.05449	8.26477	7.42721	6.54666	5.62821	4.67719	3.69909	2.69958	1.68444	0.659555	-0.36915	-1.39572	-2.41421	-3.41872	-4.40345	-5.36269	-6.29088	-7.18266	-8.03287	-8.83657	-9.58913	-10.2862	-10.9237	-11.498	-12.0057	-12.4439	-12.8101	-13.1022	-13.3184	-13.4575	-13.5187	-13.5017
0.30642	81.1258	1656.69	13.8901				13.8901	13.8494	13.7274	13.5249	13.2431	12.8836	12.4485	11.9405	11.3624	10.7176	10.01	9.24364	8.42308	7.55312	6.63886	5.68566	4.69911	3.685	2.64927	1.598	0.537362	-0.526429	-1.58713	-2.63853	-3.67445	-4.68881	-5.67568	-6.62925	-7.54394	-8.41438	-9.23547	-10.0024	-10.7106	-11.3561	-11.9349	-12.4437	-12.8795	-13.2398	-13.5224	-13.7257	-13.8485	-13.8901	-13.8502
0.30844	81.1479	1661.87	14.3067				14.3067	14.2641	14.1369	13.9256	13.6315	13.2564	12.8026	12.2726	11.6698	10.9975	10.2599	9.46138	8.60659	7.70064	6.74894	5.75712	4.73109	3.67695	2.60095	1.50949	0.409062	-0.693796	-1.79253	-2.88061	-3.95158	-4.99905	-6.01682	-6.99883	-7.93925	-8.83249	-9.67323	-10.4565	-11.1776	-11.8323	-12.4166	-12.9272	-13.361	-13.7153	-13.9881	-14.1778	-14.2833	-14.3038	-14.2394
0.31047	80.8808	1661.65	14.6874				14.6874	14.6432	14.5108	14.291	13.9852	13.5952	13.1233	12.5724	11.9458	11.2472	10.4809	9.65154	8.76403	7.82376	6.83637	5.80782	4.7443	3.65221	2.53813	1.40876	0.270914	-0.868565	-2.00281	-3.125	-4.22838	-5.30629	-6.35225	-7.35996	-8.32335	-9.23662	-10.0943	-10.8912	-11.6224	-12.2838	-12.8711	-13.3809	-13.8102	-14.1563	-14.4172	-14.5912	-14.6774	-14.6753	-14.5847
0.31249	80.6467	1655.29	15.015				15.015	14.9693	14.8321	14.6046	14.2879	13.8841	13.3955	12.8253	12.1768	11.4541	10.6615	9.8038	8.88634	7.91468	6.89474	5.83273	4.73515	3.60868	2.4602	1.29672	0.125319	-1.04684	-2.21262	-3.3649	-4.49665	-5.60097	-6.67113	-7.70059	-8.68308	-9.61261	-10.4835	-11.2904	-12.0285	-12.6932	-13.2804	-13.7867	-14.2088	-14.5443	-14.7911	-14.9476	-15.013	-14.9867	-14.8691
0.31451	80.9118	1649.61	15.3489				15.3489	15.3014	15.1595	14.9238	14.596	14.1779	13.6723	13.0821	12.4112	11.6635	10.8438	9.95702	9.00876	8.00483	6.95144	5.8551	4.72257	3.56087	2.37716	1.17876	-0.0269169	-1.23243	-2.43033	-3.61321	-4.77377	-5.90482	-6.9994	-8.05072	-9.05229	-9.99793	-10.8818	-11.6984	-12.4428	-13.1102	-13.6966	-14.1985	-14.6125	-14.9363	-15.1678	-15.3056	-15.3488	-15.2971	-15.1509
0.31654	79.6119	1649.05	15.7564				15.7564	15.7071	15.5595	15.3145	14.9736	14.539	14.0134	13.4001	12.703	11.9263	11.075	10.1543	9.17012	8.12852	7.03604	5.89952	4.72608	3.52306	2.29799	1.05853	-0.187555	-1.43246	-2.66841	-3.88765	-5.08256	-6.24565	-7.36966	-8.44753	-9.47253	-10.4382	-11.3386	-12.168	-12.9213	-13.5937	-14.181	-14.6795	-15.0861	-15.3984	-15.6142	-15.7323	-15.752	-15.673	-15.496
0.31856	78.7715	1650.77	16.1888				16.1888	16.1375	15.9839	15.729	15.3743	14.9222	14.3755	13.7377	13.0128	12.2054	11.3206	10.3641	9.34183	8.26037	7.12654	5.94754	4.73084	3.48415	2.21537	0.932549	-0.356185	-1.64266	-2.91872	-4.17628	-5.40737	-6.60418	-7.75912	-8.86488	-9.91444	-10.9012	-11.8188	-12.6614	-13.4239	-14.1012	-14.6891	-15.1839	-15.5825	-15.8823	-16.0814	-16.1786	-16.1732	-16.0652	-15.8555
0.32058	78.8978	1649	16.5834				16.5834	16.5302	16.3709	16.1064	15.7386	15.2697	14.7028	14.0415	13.29	12.4532	11.5365	10.5458	9.48728	8.3679	7.1948	5.9755	4.71785	3.42991	2.11995	0.796384	-0.532298	-1.85756	-3.1709	-4.46388	-5.72821	-6.95576	-8.13866	-9.26931	-10.3404	-11.3452	-12.2771	-13.1302	-13.8991	-14.5786	-15.1646	-15.6533	-16.0414	-16.3266	-16.5069	-16.5813	-16.5493	-16.411	-16.1673
0.3226	78.1478	1642.7	16.9452				16.9452	16.8902	16.7253	16.4517	16.0711	15.5861	14.9997	14.3158	13.5389	12.6739	11.7266	10.703	9.60986	8.45423	7.24364	5.98596	4.68937	3.36229	2.01335	0.651322	-0.714939	-2.07655	-3.42466	-4.75051	-6.04548	-7.30115	-8.50935	-9.66223	-10.7523	-11.7725	-12.7161	-13.5771	-14.3498	-15.0292	-15.6109	-16.0912	-16.4668	-16.7354	-16.8952	-16.9451	-16.8849	-16.7149	-16.4363
0.32463	77.5116	1634.95	17.2968				17.2968	17.2399	17.0694	16.7866	16.3934	15.8921	15.2863	14.5799	13.7774	12.8843	11.9064	10.85	9.72229	8.53054	7.28263	5.98679	4.65153	3.28565	1.89815	0.498145	-0.905137	-2.30246	-3.68463	-5.04254	-6.36725	-7.65005	-8.88249	-10.0565	-11.1642	-12.1985	-13.1525	-14.0199	-14.795	-15.4727	-16.0485	-16.5187	-16.8802	-17.1305	-17.2681	-17.292	-17.2021	-16.9989	-16.6838
0.32665	76.824	1627.3	17.6521				17.6521	17.5933	17.4172	17.125	16.7187	16.201	15.5752	14.8457	14.0172	13.0953	12.0861	10.9964	9.83335	8.60478	7.31885	5.98415	4.60956	3.20424	1.77757	0.339055	-1.10172	-2.53516	-3.95169	-5.34189	-6.69649	-8.00645	-9.26305	-10.4579	-11.5831	-12.631	-13.5948	-14.468	-15.2447	-15.9198	-16.4888	-16.9479	-17.2941	-17.525	-17.6391	-17.6356	-17.5146	-17.2768	-16.9239
0.32867	76.3899	1617.35	17.9817				17.9817	17.921	17.7395	17.4382	17.0192	16.4854	15.8404	15.0884	14.2347	13.2849	12.2455	11.1234	9.92629	8.66219	7.33964	5.96757	4.55523	3.11215	1.64807	0.17287	-1.30349	-2.77106	-4.21994	-5.64033	-7.02267	-8.35762	-9.63618	-10.8497	-11.99	-13.0495	-14.0208	-14.8976	-15.6738	-16.3443	-16.9045	-17.3506	-17.6796	-17.8894	-17.9784	-17.9461	-17.7927	-17.5193	-17.1276
0.33069	76.3313	1607.22	18.3074				18.3074	18.2449	18.0577	17.7472	17.3155	16.7655	16.101	15.3264	14.4472	13.4693	12.3994	11.2448	10.0134	8.71358	7.35424	5.94467	4.49449	3.01361	1.51214	0.00034467	-1.51145	-3.01293	-4.49382	-5.94402	-7.35361	-8.71298	-10.0128	-11.2443	-12.3989	-13.4689	-14.4468	-15.3261	-16.1006	-16.7652	-17.3153	-17.7471	-18.0576	-18.2448	-18.3074	-18.245	-18.0579	-17.7474	-17.3157
0.33272	75.6651	1598.62	18.6639				18.6639	18.5994	18.4062	18.0858	17.6403	17.0728	16.3873	15.5885	14.6819	13.6737	12.571	11.3814	10.113	8.77475	7.37581	5.92586	4.43494	2.91335	1.37161	-0.179612	-1.72959	-3.26761	-4.78304	-6.26539	-7.70441	-9.09016	-10.4131	-11.6639	-12.8342	-13.9157	-14.9009	-15.7831	-16.5562	-17.2148	-17.7544	-18.1712	-18.4623	-18.6258	-18.6604	-18.5661	-18.3433	-17.9937	-17.5197
0.33474	75.1221	1585.94	18.9689				18.9689	18.9025	18.7038	18.3743	17.9161	17.3325	16.6276	15.8063	14.8744	13.8383	12.7055	11.4837	10.1815	8.80806	7.37297	5.88628	4.35839	2.8	1.22201	-0.364535	-1.94853	-3.51888	-5.06461	-6.57489	-8.03915	-9.44714	-10.789	-12.0554	-13.2374	-14.3267	-15.3157	-16.1976	-16.9661	-17.6158	-18.1423	-18.5418	-18.8115	-18.9495	-18.9549	-18.8276	-18.5686	-18.1796	-17.6634
0.33676	74.6431	1572.68	19.2666				19.2666	19.1983	18.9941	18.6553	18.1844	17.5846	16.8603	16.0165	15.0593	13.9955	12.8324	11.5785	10.2426	8.83406	7.36298	5.83974	4.27513	2.68024	1.06637	-0.555064	-2.17256	-3.77467	-5.35004	-6.88751	-8.37619	-9.80554	-11.1654	-12.4462	-13.6388	-14.7349	-15.7265	-16.6067	-17.3693	-18.0089	-18.5208	-18.9016	-19.1485	-19.2598	-19.2346	-19.0731	-18.7766	-18.347	-17.7875
0.33878	74.1745	1560.5	19.5788				19.5788	19.5086	19.2985	18.9502	18.4659	17.8493	17.1047	16.2375	15.2539	14.1609	12.9665	11.679	10.3079	8.86279	7.35419	5.79287	4.19001	2.55713	0.905906	-0.751809	-2.40413	-4.03923	-5.64536	-7.21102	-8.72499	-10.1764	-11.5549	-12.8505	-14.054	-15.1567	-16.1508	-17.0291	-17.7854	-18.4141	-18.9108	-19.2719	-19.4949	-19.5782	-19.521	-19.324	-18.9883	-18.5166	-17.9121
0.34081	73.415	1549.73	19.9172				19.9172	19.8449	19.6287	19.2701	18.7716	18.137	17.3708	16.4785	15.4668	14.3427	13.1147	11.7915	10.3827	8.89862	7.34997	5.748	4.10432	2.43087	0.73978	-0.956676	-2.64619	-4.31651	-5.95551	-7.5513	-9.09231	-10.5673	-11.9657	-13.2773	-14.4925	-15.6026	-16.5995	-17.476	-18.2256	-18.8431	-19.3238	-19.6644	-19.8622	-19.916	-19.8253	-19.5907	-19.214	-18.698	-18.0462
0.34283	73.0624	1537.54	20.2301				20.2301	20.1558	19.9336	19.565	19.0528	18.4007	17.6136	16.6971	15.6581	14.5041	13.2436	11.8859	10.441	8.91939	7.33231	5.6914	4.00871	2.29659	0.567608	-1.16554	-2.89013	-4.5935	-6.26316	-7.88683	-9.4526	-10.949	-12.365	-13.6902	-14.9149	-16.0301	-17.0277	-17.9002	-18.6414	-19.2456	-19.7086	-20.0269	-20.1982	-20.2212	-20.0958	-19.8228	-19.4043	-18.8433	-18.144
0.34485	72.5985	1525.61	20.549				20.549	20.4727	20.2443	19.8655	19.3392	18.6692	17.8606	16.9192	15.8522	14.6675	13.3738	11.9808	10.4987	8.93872	7.31231	5.63159	3.90903	2.15744	0.389818	-1.3807	-3.14095	-4.87788	-6.57858	-8.2304	-9.8211	-11.3388	-12.7724	-14.111	-15.3448	-16.4647	-17.4622	-18.3301	-19.0617	-19.6518	-20.096	-20.3908	-20.5342	-20.525	-20.3634	-20.0506	-19.5888	-18.9815	-18.2332
0.34687	71.7658	1512.22	20.8529				20.8529	20.7746	20.5401	20.1512	19.611	18.9233	18.0934	17.1276	16.033	14.8179	13.4915	12.0637	10.5452	8.94748	7.28251	5.56281	3.80131	2.01124	0.206051	-1.60068	-3.39539	-5.16457	-6.89495	-8.57351	-10.1876	-11.7252	-13.1746	-14.5251	-15.7664	-16.8891	-17.885	-18.7465	-19.467	-20.0413	-20.465	-20.7348	-20.8489	-20.8062	-20.6072	-20.2533	-19.7472	-19.0927	-18.2947
0.3489	71.9535	1497.35	21.1222				21.1222	21.0419	20.8016	20.4031	19.8496	19.145	18.295	17.3058	16.185	14.9412	13.5838	12.1231	10.5702	8.93694	7.23573	5.47951	3.68163	1.85575	0.015764	-1.82434	-3.65058	-5.44906	-7.2061	-8.90836	-10.5429	-12.0972	-13.5596	-14.9189	-16.1648	-17.2877	-18.2792	-19.1317	-19.8388	-20.395	-20.7961	-21.0391	-21.1222	-21.0446	-20.807	-20.4113	-19.8603	-19.1583	-18.3107
0.35092	71.9872	1478.74	21.333				21.333	21.2509	21.0054	20.5984	20.0329	19.3133	18.4452	17.4352	16.291	15.0216	13.6367	12.1468	10.5636	8.89903	7.16606	5.37797	3.54852	1.69177	-0.177993	-2.04639	-3.89904	-5.7217	-7.50035	-9.22132	-10.8714	-12.4378	-13.9085	-15.2723	-16.5186	-17.6378	-18.6214	-19.4618	-20.1525	-20.6881	-21.0646	-21.2792	-21.33	-21.2168	-20.9404	-20.5029	-19.9077	-19.1594	-18.2637
0.35294	70.978	1460.33	21.5584				21.5584	21.4745	21.2235	20.8075	20.2295	19.4942	18.6071	17.5753	16.4068	15.1106	13.6968	12.1765	10.5615	8.86423	7.09803	5.2766	3.41413	1.52508	-0.375822	-2.27381	-4.1541	-6.00207	-7.80334	-9.5439	-11.2102	-12.7893	-14.2689	-15.6374	-16.8843	-17.9999	-18.9754	-19.8032	-20.477	-20.9914	-21.3426	-21.5277	-21.5452	-21.3952	-21.0787	-20.5982	-19.9574	-19.1614	-18.2163
0.35496	70.9096	1442.78	21.7787				21.7787	21.693	21.4366	21.0115	20.421	19.6698	18.7639	17.7102	16.5173	15.1943	13.7517	12.2009	10.5541	8.82429	7.025	5.17042	3.27516	1.35412	-0.577583	-2.50473	-4.41218	-6.28489	-8.10815	-9.86761	-11.5494	-13.1403	-14.6278	-16.0002	-17.2467	-18.3574	-19.3237	-20.1379	-20.7936	-21.2857	-21.6103	-21.7648	-21.748	-21.5601	-21.2025	-20.6781	-19.9909	-19.1464	-18.1513
0.35699	70.9163	1426.57	22.0177				22.0177	21.9301	21.6679	21.2332	20.6295	19.8617	18.9357	17.859	16.6401	15.2888	13.8158	12.2328	10.5525	8.78814	6.95385	5.0642	3.13424	1.17934	-0.784955	-2.743	-4.67921	-6.57817	-8.42478	-10.2043	-11.9026	-13.5062	-15.0023	-16.3789	-17.6252	-18.7312	-19.6881	-20.4883	-21.1254	-21.5943	-21.8913	-22.0141	-21.9617	-21.7345	-21.3342	-20.7642	-20.0288	-19.1341	-18.087
0.35901	69.7085	1408.24	22.236				22.236	22.1465	21.8787	21.4348	20.8183	20.0343	19.0889	17.9899	16.7461	15.3675	13.8652	12.2512	10.5386	8.74123	6.87345	4.95034	2.98738	1.00037	-0.994698	-2.98175	-4.94481	-6.86805	-8.73601	-10.5336	-12.2465	-13.8607	-15.3634	-16.7424	-17.9866	-19.086	-20.0318	-20.8163	-21.4333	-21.8777	-22.146	-22.236	-22.147	-21.8797	-21.4363	-20.8203	-20.0367	-19.0918	-17.9933
0.36103	69.4772	1390.3	22.4398				22.4398	22.3484	22.0751	21.6222	20.9931	20.1932	19.2289	18.1081	16.8398	15.4345	13.9035	12.2593	10.5153	8.6857	6.78539	4.82985	2.83499	0.817049	-1.20754	-3.22231	-5.21084	-7.15694	-9.04479	-10.859	-12.5848	-14.2082	-15.7159	-17.0956	-18.3362	-19.4275	-20.3606	-21.128	-21.7234	-22.142	-22.3803	-22.4364	-22.3098	-22.0016	-21.5143	-20.8519	-20.0197	-19.0245	-17.8745
0.36305	69.165	1367.92	22.5627				22.5627	22.4699	22.192	21.7315	21.0921	20.279	19.299	18.1601	16.8717	15.4445	13.8901	12.2213	10.4519	8.59653	6.67036	4.68928	2.66959	0.627926	-1.41891	-3.45406	-5.46078	-7.42254	-9.3232	-11.1471	-12.8793	-14.5054	-16.0121	-17.387	-18.6187	-19.6972	-20.6136	-21.3602	-21.931	-22.3213	-22.5278	-22.5488	-22.3843	-22.0354	-21.5052	-20.7979	-19.9194	-18.877	-17.6791
0.36508	69.0627	1348.92	22.7359				22.7359	22.6413	22.3582	21.889	21.2375	20.4093	19.4112	18.2515	16.9398	15.4871	13.9056	12.2082	10.4093	8.52365	6.56708	4.55584	2.50668	0.436647	-1.63702	-3.69705	-5.72631	-7.70791	-9.62533	-11.4626	-13.2045	-14.8365	-16.3449	-17.7173	-18.9422	-20.0095	-20.9101	-21.6367	-22.1832	-22.545	-22.7192	-22.7042	-22.5002	-22.1089	-21.5336	-20.779	-19.8514	-18.7586	-17.5097
0.3671	68.8758	1328.69	22.8793				22.8793	22.7831	22.495	22.0176	21.3549	20.5125	19.4974	18.3182	16.9849	15.5085	13.9017	12.1778	10.3515	8.43798	6.45347	4.41465	2.33867	0.243004	-1.8547	-3.9368	-5.98577	-7.98435	-9.91573	-11.7637	-13.5126	-15.1477	-16.6554	-18.0229	-19.2387	-20.2926	-21.1757	-21.8805	-22.4012	-22.7334	-22.8742	-22.8224	-22.5786	-22.1448	-21.5245	-20.7231	-19.7473	-18.6053	-17.3066
0.36912	68.4903	1308.66	23.0224				23.0224	22.9245	22.6315	22.1458	21.4718	20.615	19.5828	18.3839	17.0286	15.5285	13.8961	12.1455	10.2916	8.35008	6.33752	4.27102	2.16817	0.0468812	-2.07481	-4.17885	-6.24732	-8.26264	-10.2076	-12.0658	-13.8212	-15.4591	-16.9654	-18.3273	-19.5333	-20.5731	-21.4378	-22.12	-22.6141	-22.9157	-23.0223	-22.9329	-22.6485	-22.1713	-21.5054	-20.6566	-19.6319	-18.4402	-17.0916
0.37114	68.2203	1287.08	23.1262				23.1262	23.0267	22.7291	22.236	21.5516	20.6818	19.6341	18.4174	17.0423	15.5207	13.8654	12.0909	10.2124	8.24604	6.20873	4.118	1.99184	-0.151445	-2.29343	-4.41569	-6.49996	-8.52831	-10.4833	-12.3481	-14.1067	-15.7439	-17.2456	-18.599	-19.7924	-20.8156	-21.6596	-22.3173	-22.7831	-23.0528	-23.1242	-22.9967	-22.6713	-22.1509	-21.4399	-20.5445	-19.4723	-18.2327	-16.8361
0.37317	67.8975	1262.3	23.162				23.162	23.0613	22.76	22.2608	21.5679	20.6875	19.6271	18.3961	17.0051	15.4661	13.7927	11.9993	10.1015	8.11588	6.05967	3.95076	1.80749	-0.351497	-2.50743	-4.64155	-6.73531	-8.77049	-10.7294	-12.595	-14.351	-15.9822	-17.4745	-18.8147	-19.9913	-20.9941	-21.8142	-22.4447	-22.8799	-23.1162	-23.1513	-22.9852	-22.6191	-22.0563	-21.3017	-20.3618	-19.2449	-17.9605	-16.52
0.37519	68.0368	1242.48	23.2721				23.2721	23.1698	22.8638	22.3568	21.6532	20.7593	19.6829	18.4334	17.0219	15.4607	13.7636	11.9455	10.0224	8.01118	5.92951	3.79572	1.62856	-0.55292	-2.72954	-4.88216	-6.99186	-9.04009	-11.0088	-12.8808	-14.6395	-16.2696	-17.7566	-19.0874	-20.2505	-21.2356	-22.0339	-22.6385	-23.0442	-23.2472	-23.2458	-23.0401	-22.6318	-22.0246	-21.2237	-20.2362	-19.0708	-17.7378	-16.2488
0.37721	67.228	1224.87	23.4373				23.4373	23.3332	23.0217	22.5056	21.7896	20.8799	19.7847	18.5136	17.078	15.4907	13.7657	11.9184	9.9652	7.92342	5.81123	3.6474	1.45116	-0.757976	-2.96038	-5.13647	-7.26692	-9.3328	-11.3157	-13.1981	-14.9632	-16.5953	-18.08	-19.404	-20.5556	-21.5245	-22.3021	-22.8815	-23.2576	-23.4271	-23.3883	-23.1417	-22.6895	-22.0356	-21.1859	-20.148	-18.931	-17.5458	-16.0046
0.37924	66.7601	1202.66	23.4962				23.4962	23.3906	23.075	22.5521	21.8267	20.9052	19.7959	18.5088	17.0554	15.4489	13.7036	11.8352	9.86052	7.79725	5.66395	3.47977	1.26434	-0.962454	-3.1806	-5.37018	-7.51152	-9.58539	-11.5732	-13.457	-15.2199	-16.8462	-18.3211	-19.6314	-20.7655	-21.713	-22.4655	-23.0161	-23.3601	-23.4942	-23.4173	-23.1301	-22.6351	-21.9367	-21.0414	-19.957	-18.6934	-17.2619	-15.6753
0.38126	66.6166	1179.34	23.511				23.511	23.4043	23.0851	22.5563	21.8228	20.8912	19.7699	18.4691	17.0007	15.378	13.6156	11.7297	9.73723	7.6564	5.50606	3.30573	1.0754	-1.1647	-3.39422	-5.59293	-7.74086	-9.81853	-11.8071	-13.6884	-15.4455	-17.0624	-18.5243	-19.8181	-20.932	-21.8559	-22.5814	-23.1018	-23.4126	-23.5108	-23.3956	-23.068	-22.5309	-21.7894	-20.85	-19.7214	-18.4137	-16.9389	-15.3102
0.38328	66.1428	1155.71	23.5137				23.5137	23.4058	23.0832	22.5488	21.8076	20.8663	19.7335	18.4197	16.9369	15.2987	13.5202	11.6176	9.60847	7.51115	5.34493	3.12967	0.885698	-1.3664	-3.60596	-5.81244	-7.9656	-10.0457	-12.0336	-13.9111	-15.661	-17.2672	-18.715	-19.991	-21.0837	-21.983	-22.6805	-23.17	-23.4469	-23.5087	-23.3548	-22.9867	-22.4077	-21.623	-20.64	-19.4677	-18.1167	-16.5996	-14.9301
0.3853	66.0857	1133.91	23.534				23.534	23.4249	23.0986	22.5582	21.8086	20.8568	19.7117	18.3838	16.8855	15.2306	13.4345	11.5138	9.48642	7.37108	5.18739	2.9556	0.696417	-1.56923	-3.82032	-6.03599	-8.1957	-10.2794	-12.2679	-14.1425	-15.8861	-17.4824	-18.9166	-20.1754	-21.2471	-22.1219	-22.7916	-23.2499	-23.4927	-23.5177	-23.3247	-22.9154	-22.2936	-21.4652	-20.4377	-19.2208	-17.8257	-16.2652	-14.554
0.38733	65.9939	1109.32	23.4825				23.4825	23.3725	23.0435	22.4986	21.7429	20.7835	19.6294	18.2914	16.7819	15.1153	13.3071	11.3741	9.33461	7.20765	5.01316	2.77171	0.504278	-1.76787	-4.02346	-6.24135	-8.40077	-10.4815	-12.464	-14.3297	-16.0612	-17.6422	-19.0579	-20.295	-21.342	-22.189	-22.8282	-23.2534	-23.4608	-23.4484	-23.2163	-22.7666	-22.1037	-21.2337	-20.1647	-18.9068	-17.4718	-15.873	-14.1256
0.38935	65.3194	1087.43	23.4887				23.4887	23.3775	23.045	22.4943	21.7307	20.7613	19.5954	18.244	16.7199	15.0374	13.2127	11.2628	9.2063	7.06264	4.85213	2.59568	0.314652	-1.96935	-4.23471	-6.45998	-8.62409	-10.7066	-12.6877	-14.5487	-16.2719	-17.8411	-19.2414	-20.4596	-21.484	-22.3051	-22.915	-23.3079	-23.4802	-23.4302	-23.1584	-22.6674	-21.9617	-21.0482	-19.9353	-18.6338	-17.1558	-15.5154	-13.7282
0.39137	64.8374	1067.81	23.531				23.531	23.4185	23.0819	22.5246	21.7518	20.7709	19.5914	18.2244	16.6831	14.9823	13.1381	11.1682	9.09155	6.9279	4.69799	2.42313	0.125098	-2.17413	-4.45257	-6.68841	-8.86027	-10.9474	-12.9298	-14.7885	-16.5057	-18.0651	-19.4517	-20.6522	-21.6551	-22.4509	-23.032	-23.3927	-23.5297	-23.4416	-23.1293	-22.5957	-21.846	-20.8873	-19.7288	-18.3817	-16.8586	-15.1743	-13.3449
0.39339	64.7939	1045.86	23.4958				23.4958	23.3823	23.0428	22.4806	21.7011	20.7119	19.5225	18.1445	16.5911	14.8774	13.0198	11.0365	8.94646	6.76998	4.52807	2.2424	-0.0649348	-2.37165	-4.65544	-6.89424	-9.06641	-11.151	-13.1277	-14.9776	-16.6828	-18.2267	-19.5945	-20.7729	-21.7506	-22.518	-23.0678	-23.3947	-23.4955	-23.3692	-23.0171	-22.4425	-21.651	-20.6503	-19.45	-18.0617	-16.4989	-14.7766	-12.9115
0.39542	64.5599	1024.55	23.4694				23.4694	23.3548	23.0122	22.4449	21.6584	20.6604	19.4607	18.071	16.5048	14.7775	12.9059	10.9082	8.80407	6.61394	4.35924	2.06197	-0.255428	-2.57034	-4.86015	-7.1025	-9.2755	-11.3579	-13.3295	-15.1708	-16.8641	-18.3927	-19.7416	-20.8979	-21.85	-22.5888	-23.1071	-23.3997	-23.4639	-23.2989	-22.9064	-22.2903	-21.4565	-20.4132	-19.1706	-17.7408	-16.1377	-14.3771	-12.4761
0.39744	63.9557	1002.72	23.4231				23.4231	23.3076	22.9621	22.3902	21.5974	20.5915	19.3826	17.9824	16.4049	14.6655	12.7814	10.7713	8.65496	6.45321	4.18781	1.8811	-0.444162	-2.76505	-5.05865	-7.30236	-9.47404	-11.5523	-13.5165	-15.3475	-17.027	-18.5386	-19.8673	-21	-21.9256	-22.6349	-23.121	-23.3789	-23.4063	-23.2027	-22.7703	-22.1133	-21.2381	-20.1534	-18.87	-17.4003	-15.7591	-13.9624	-12.028
0.39946	63.9783	980.659	23.3406				23.3406	23.2243	22.8765	22.3009	21.503	20.4908	19.2745	17.866	16.2796	14.5309	12.6375	10.6181	8.49286	6.28303	4.01059	1.69819	-0.631137	-2.95417	-5.24777	-7.48908	-9.65576	-11.7262	-13.6798	-15.4971	-17.16	-18.6519	-19.9579	-21.065	-21.9623	-22.6407	-23.0934	-23.3161	-23.3064	-23.0645	-22.5927	-21.8959	-20.9808	-19.8566	-18.5346	-17.0279	-15.3516	-13.5222	-11.5581
0.40148	63.7694	959.643	23.2757				23.2757	23.1585	22.8083	22.2285	21.4249	20.4057	19.181	17.7633	16.1668	14.4076	12.5034	10.4732	8.33772	6.11827	3.83724	1.51758	-0.81736	-3.14407	-5.43913	-7.67944	-9.84245	-11.9064	-13.8505	-15.6552	-17.3023	-18.7752	-20.0592	-21.1412	-22.0105	-22.6582	-23.0778	-23.2651	-23.2183	-22.9377	-22.4263	-21.6891	-20.7336	-19.5694	-18.2083	-16.6638	-14.9516	-13.089	-11.0945
0.40351	62.6934	935.778	23.1459				23.1459	23.0282	22.6764	22.094	21.287	20.2635	19.034	17.611	16.0089	14.2441	12.3344	10.2993	8.15946	5.93668	3.65354	1.33325	-1.0006	-3.32427	-5.61415	-7.84694	-9.99995	-12.0513	-13.9801	-15.7667	-17.3931	-18.8426	-20.1005	-21.154	-21.9925	-22.6073	-22.9923	-23.1435	-23.0594	-22.7408	-22.191	-21.4156	-20.4224	-19.2216	-17.8253	-16.2478	-14.5051	-12.6149	-10.5965
0.40553	62.5899	913.632	23.0167				23.0167	22.8985	22.5452	21.9603	21.1499	20.1223	18.888	17.4598	15.8523	14.082	12.167	10.1271	7.98325	5.75737	3.47237	1.15171	-1.18078	-3.50115	-5.78555	-8.01055	-10.1533	-12.1917	-14.105	-15.8734	-17.4788	-18.9047	-20.1364	-21.1614	-21.969	-22.551	-22.9014	-23.0167	-22.8955	-22.5393	-21.9515	-21.1384	-20.1081	-18.8714	-17.4408	-15.8312	-14.0589	-12.1423	-10.101
0.40755	63.0546	893.331	22.9059				22.9059	22.7871	22.4319	21.8441	21.0297	19.9972	18.7573	17.3229	15.7087	13.9317	12.0101	9.96395	7.81447	5.58393	3.29547	0.972836	-1.35989	-3.67851	-5.95898	-8.17764	-10.3115	-12.3384	-14.2373	-15.9885	-17.5739	-18.9771	-20.1834	-21.1803	-21.9576	-22.5071	-22.8232	-22.9026	-22.7444	-22.3503	-21.7244	-20.8731	-19.8054	-18.5322	-17.0668	-15.4244	-13.622	-11.6784	-9.61357
0.40957	62.9477	873.441	22.8067				22.8067	22.6872	22.3301	21.7391	20.9204	19.8825	18.6364	17.195	15.5735	13.7889	11.8599	9.80658	7.65057	5.41442	3.12156	0.795992	-1.53791	-3.8557	-6.1331	-8.34626	-10.472	-12.488	-14.3733	-16.1079	-17.6738	-19.0546	-20.2358	-21.2051	-21.9522	-22.4693	-22.7511	-22.7946	-22.5993	-22.1672	-21.503	-20.6135	-19.5081	-18.1983	-16.6979	-15.0226	-13.1899	-11.2191	-9.13076
0.4116	62.4703	851.8	22.6548				22.6548	22.535	22.1767	21.5839	20.7627	19.7219	18.4724	17.0275	15.4025	13.6145	11.6825	9.62694	7.46951	5.23306	2.94124	0.618316	-1.71115	-4.02252	-6.29133	-8.49359	-10.606	-12.6062	-14.473	-16.1868	-17.7292	-19.0842	-20.2372	-21.1762	-21.8911	-22.3744	-22.621	-22.6284	-22.3963	-21.9273	-21.2263	-20.3008	-19.1605	-17.8175	-16.2861	-14.5823	-12.7243	-10.7316	-8.62543
0.41362	61.7306	830.61	22.5043				22.5043	22.384	22.0247	21.4301	20.6065	19.5628	18.3101	16.8618	15.2333	13.4422	11.5074	9.44966	7.29099	5.05443	2.76387	0.443785	-1.88104	-4.18577	-6.44579	-8.63694	-10.7358	-12.72	-14.5683	-16.261	-17.7799	-19.1089	-20.2338	-21.1425	-21.8254	-22.275	-22.4867	-22.4582	-22.1898	-21.6843	-20.9472	-19.9862	-18.8118	-17.4364	-15.8747	-14.1434	-12.261	-10.2477	-8.12485
0.41564	61.3284	809.464	22.328				22.328	22.2076	21.8476	21.2519	20.427	19.3817	18.1273	16.6774	15.0475	13.2554	11.3202	9.26294	7.10575	4.8719	2.58549	0.271197	-2.04603	-4.34118	-6.5895	-8.76673	-10.8494	-12.815	-14.6424	-16.3118	-17.8053	-19.1067	-20.2019	-21.0793	-21.7292	-22.1448	-22.3214	-22.2573	-21.953	-21.412	-20.6399	-19.6452	-18.4386	-17.0331	-15.4438	-13.6879	-11.7844	-9.75369	-7.61781
0.41766	60.8742	787.879	22.1222				22.1222	22.0017	21.6416	21.0457	20.2206	19.1752	17.921	16.4716	14.8427	13.0522	11.1194	9.06562	6.91304	4.68516	2.40625	0.101128	-2.2051	-4.4873	-6.72063	-8.88075	-10.9441	-12.8883	-14.6921	-16.3359	-17.8017	-19.0736	-20.1377	-20.9825	-21.5988	-21.9797	-22.1213	-22.0219	-21.6826	-21.1072	-20.3018	-19.2753	-18.0388	-16.6059	-14.992	-13.2149	-11.2938	-9.24973	-7.10488
0.41969	61.0235	770.884	22.0236				22.0236	21.9024	21.5404	20.9415	20.1122	19.0618	17.8017	16.3458	14.7101	12.9126	10.9731	8.91289	6.75467	4.52216	2.23991	-0.0669773	-2.37313	-4.65318	-6.88205	-9.03522	-11.089	-13.0209	-14.8095	-16.4352	-17.8802	-19.1285	-20.1665	-20.9826	-21.5679	-21.9161	-22.0231	-21.888	-21.5121	-20.8996	-20.0573	-18.9943	-17.7225	-16.2557	-14.6101	-12.8038	-10.8567	-8.79023	-6.62705
0.42171	61.6345	753.816	21.8915				21.8915	21.77	21.4067	20.8056	19.9736	18.9197	17.6558	16.1958	14.5559	12.7544	10.8113	8.74811	6.58778	4.35429	2.07245	-0.2324	-2.53467	-4.8088	-7.02953	-9.17219	-11.213	-13.1293	-14.8998	-16.5048	-17.9266	-19.1493	-20.1593	-20.9455	-21.4991	-21.814	-21.8866	-21.7161	-21.3046	-20.6564	-19.7789	-18.6817	-17.377	-15.8794	-14.2055	-12.3738	-10.4047	-8.32009	-6.14307
0.42373	61.053	734.118	21.6977				21.6977	21.5761	21.2126	20.6112	19.7788	18.7246	17.4605	16.0007	14.3615	12.5612	10.6202	8.56005	6.40395	4.17606	1.90134	-0.394685	-2.68629	-4.94778	-7.15379	-9.27961	-11.3014	-13.1965	-14.9436	-16.5232	-17.9175	-19.111	-20.0902	-20.8442	-21.3645	-21.6452	-21.6833	-21.4783	-21.0325	-20.351	-19.4412	-18.3135	-16.9805	-15.4571	-13.7604	-11.9094	-9.92491	-7.82916	-5.64563
0.42575	60.1664	715.027	21.5163				21.5163	21.3945	21.0306	20.4287	19.5955	18.5406	17.2758	15.8155	14.1761	12.3764	10.4365	8.37852	6.22571	4.00244	1.73387	-0.554332	-2.83626	-5.08608	-7.27834	-9.38822	-11.3918	-13.2665	-14.9911	-16.5459	-17.9135	-19.0783	-20.0272	-20.7495	-21.2369	-21.4839	-21.4877	-21.2484	-20.7686	-20.0537	-19.1118	-17.9536	-16.5922	-15.043	-13.3236	-11.4533	-9.45346	-7.34659	-5.15656
0.42778	59.5963	695.819	21.3055				21.3055	21.1837	20.82	20.2183	19.3856	18.3314	17.0677	15.6091	13.972	12.1753	10.2395	8.18674	6.04039	3.82502	1.56595	-0.711016	-2.97986	-5.21465	-7.38986	-9.48063	-11.4631	-13.3145	-15.0139	-16.5416	-17.8804	-19.0148	-19.932	-20.6215	-21.0753	-21.2883	-21.258	-20.9848	-20.4719	-19.7251	-18.7528	-17.5663	-16.1791	-14.607	-12.868	-10.9819	-8.9704	-6.85638	-4.66401
0.4298	59.4991	677.798	21.0991				21.0991	20.9774	20.6138	20.0124	19.1801	18.1266	16.8641	15.407	13.7722	11.9786	10.0468	7.99911	5.85916	3.65163	1.40198	-0.863844	-3.1197	-5.33958	-7.49787	-9.56967	-11.5311	-13.3595	-15.0338	-16.5348	-17.845	-18.9493	-19.8351	-20.4921	-20.9128	-21.0922	-21.0284	-20.722	-20.1765	-19.3984	-18.3965	-17.1824	-15.7702	-14.176	-12.4183	-10.5174	-8.49515	-6.37493	-4.18118
0.43182	59.7914	661.228	20.9123				20.9123	20.7905	20.4267	19.8251	18.9926	17.939	16.6766	15.22	13.5862	11.7942	9.86484	7.82066	5.68543	3.484	1.24201	-1.01445	-3.25909	-5.46579	-7.60884	-9.66331	-11.6053	-13.4121	-15.0628	-16.5381	-17.8209	-18.8961	-19.7514	-20.3767	-20.7647	-20.911	-20.8138	-20.4743	-19.8964	-19.0869	-18.0551	-16.8131	-15.3754	-13.7586	-11.9817	-10.0652	-8.03155	-5.9044	-3.7085
0.43385	59.4655	645.426	20.76				20.76	20.638	20.2734	19.6706	18.8366	17.7813	16.5169	15.0585	13.423	11.6298	9.69997	7.6561	5.52225	3.3235	1.08569	-1.16488	-3.40175	-5.59865	-7.72975	-9.77001	-11.6954	-13.4834	-15.1129	-16.5648	-17.8221	-18.8698	-19.6958	-20.2903	-20.6464	-20.7598	-20.6292	-20.2562	-19.6451	-18.8032	-17.7402	-16.4688	-15.0038	-13.3624	-11.5641	-9.62979	-7.58233	-5.44577	-3.2452
0.43587	59.2966	628.295	20.5371				20.5371	20.4153	20.0513	19.4495	18.6169	17.5636	16.3018	14.8467	13.2155	11.4276	9.50402	7.46775	5.3429	3.15467	0.929014	-1.30766	-3.52882	-5.70812	-7.81972	-9.83855	-11.7407	-13.5035	-15.1062	-16.5297	-17.7571	-18.7739	-19.5679	-20.1299	-20.453	-20.5336	-20.3706	-19.9659	-19.3244	-18.4537	-17.364	-16.0684	-14.5822	-12.923	-11.1105	-9.16626	-7.11324	-4.97585	-2.77944
0.43789	59.3604	611.912	20.3158				20.3158	20.1942	19.8308	19.23	18.3989	17.3476	16.0886	14.637	13.0102	11.2276	9.31053	7.28203	5.16635	2.98881	0.775495	-1.44711	-3.65239	-5.81394	-7.90588	-9.90317	-11.7819	-13.5196	-15.0954	-16.4905	-17.6881	-18.674	-19.4364	-19.966	-20.2566	-20.3046	-20.1096	-19.6738	-19.0025	-18.1037	-16.9881	-15.6692	-14.1626	-12.4865	-10.6609	-8.70768	-6.6502	-4.5131	-2.32196
0.43991	59.1068	596.984	20.1437				20.1437	20.022	19.6583	19.0572	18.2258	17.1741	15.915	14.4636	12.8374	11.056	9.14113	7.11577	5.00443	2.83263	0.626595	-1.58701	-3.78143	-5.93017	-8.00725	-9.98758	-11.8472	-13.5637	-15.1164	-16.4863	-17.6571	-18.6145	-19.347	-19.8457	-20.1047	-20.1207	-19.8936	-19.4261	-18.7239	-17.7955	-16.6521	-15.3074	-13.7778	-12.0817	-10.2396	-8.27382	-6.20806	-4.06728	-1.87736
0.44194	58.9197	581.063	19.9179				19.9179	19.7964	19.4336	18.8337	18.0042	16.9552	15.6994	14.2521	12.631	10.8559	8.94847	6.93187	4.83075	2.67071	0.478109	-1.72032	-3.89778	-6.0277	-8.08412	-10.042	-11.8773	-13.5679	-15.093	-16.434	-17.5746	-18.501	-19.2017	-19.6682	-19.8949	-19.879	-19.6207	-19.1231	-18.3923	-17.4373	-16.2696	-14.9035	-13.3556	-11.6449	-9.79219	-7.82007	-5.75258	-3.61494	-1.43322
0.44396	59.0099	565.932	19.6932				19.6932	19.5721	19.21	18.6116	17.7841	16.7378	15.4855	14.0426	12.427	10.6584	8.75858	6.75103	4.6604	2.51242	0.333515	-1.84949	-4.00974	-6.12064	-8.15622	-10.0914	-11.9024	-13.567	-15.0646	-16.3768	-17.4875	-18.3829	-19.0522	-19.487	-19.6819	-19.6347	-19.3458	-18.8189	-18.0604	-17.0796	-15.8886	-14.5022	-12.9372	-11.2131	-9.3509	-7.37368	-5.30572	-3.17246	-1.00016
0.44598	58.5396	551.84	19.5152				19.5152	19.394	19.032	18.4337	17.6064	16.5605	15.3089	13.8672	12.2534	10.4873	8.59103	6.58806	4.50328	2.36258	0.19254	-1.97989	-4.12774	-6.22432	-8.24361	-10.1605	-11.9513	-13.5936	-15.0671	-16.3535	-17.4369	-18.3037	-18.9432	-19.3474	-19.5114	-19.4331	-19.1135	-18.5565	-17.7691	-16.761	-15.5447	-14.1355	-12.5507	-10.81	-8.9351	-6.94924	-4.87708	-2.74435	-0.577546
0.448	58.5583	536.763	19.2631				19.2631	19.1424	18.7819	18.1859	17.3621	16.3208	15.0749	13.6401	12.0344	10.2779	8.3926	6.40213	4.33145	2.20648	0.0538659	-2.09942	-4.22641	-6.30043	-8.2955	-10.1866	-11.9501	-13.5638	-15.0076	-16.2633	-17.3152	-18.1501	-18.7576	-19.1301	-19.2628	-19.1542	-18.8055	-18.2212	-17.4085	-16.3777	-15.1417	-13.716	-12.1183	-10.3689	-8.48944	-6.50364	-4.43635	-2.31347	-0.161596
0.45003	57.8276	522.213	19.0478				19.0478	18.9274	18.5676	17.9731	17.1513	16.1126	14.8702	13.4398	11.8394	10.0893	8.21168	6.23019	4.16992	2.05693	-0.0820705	-2.22003	-4.32993	-6.38507	-8.35947	-10.2282	-11.9676	-13.5556	-14.9722	-16.1996	-17.2221	-18.0268	-18.6036	-18.9451	-19.0471	-18.9082	-18.5303	-17.9181	-17.0793	-16.0245	-14.7671	-13.323	-11.7104	-9.94973	-8.06327	-6.07485	-4.00961	-1.89368	0.246205
0.45205	57.2747	509.842	18.8986				18.8986	18.778	18.4179	17.8228	17.0003	15.9609	14.7179	13.2871	11.6867	9.93733	8.06113	6.08208	4.02543	1.91743	-0.215036	-2.34476	-4.44457	-6.48767	-8.448	-10.3005	-12.0217	-13.5894	-14.9838	-16.187	-17.1837	-17.9612	-18.5095	-18.8217	-18.8937	-18.7247	-18.3167	-17.6751	-16.808	-15.7265	-14.4443	-12.9778	-11.3458	-9.56896	-7.67008	-5.67334	-3.60421	-1.48911	0.644997
0.45407	57.3036	497.494	18.7125				18.7125	18.5921	18.2323	17.6379	16.8164	15.7784	14.5373	13.1091	11.5122	9.76705	7.89619	5.92369	3.87493	1.7763	-0.345201	-2.46226	-4.54762	-6.57444	-8.51663	-10.3492	-12.0485	-13.5928	-14.9621	-16.1388	-17.1077	-17.8564	-18.3753	-18.6576	-18.6998	-18.5012	-18.0645	-17.3953	-16.5021	-15.3966	-14.0928	-12.6076	-10.9602	-9.17161	-7.265	-5.26487	-3.19697	-1.08792	1.03513
0.45609	57.6008	485.096	18.4984				18.4984	18.3783	18.0195	17.4266	16.6075	15.5727	14.3356	12.9124	11.3214	9.58347	7.72104	5.75834	3.72085	1.63504	-0.472003	-2.57292	-4.64041	-6.64765	-8.56855	-10.3782	-12.053	-13.5713	-14.9134	-16.0617	-17.0015	-17.7205	-18.2093	-18.4617	-18.4743	-18.247	-17.7826	-17.0874	-16.1702	-15.0431	-13.7205	-12.2198	-10.5604	-8.76381	-6.85342	-4.85403	-2.79159	-0.692907	1.41478
0.45812	57.6212	470.796	18.1991				18.1991	18.0799	17.7238	17.1354	16.3225	15.2958	14.0686	12.6571	11.0798	9.35724	7.51211	5.56855	3.55202	1.48896	-0.593617	-2.66841	-4.70825	-6.68639	-8.57692	-10.3551	-11.9975	-13.4828	-14.7914	-15.9062	-16.8126	-17.4987	-17.9555	-18.177	-18.1604	-17.9058	-17.4166	-16.6992	-15.763	-14.6203	-13.286	-11.7776	-10.1148	-8.31959	-6.41533	-4.42701	-2.38068	-0.303165	1.77833
0.46014	58.2016	458.525	17.9461				17.9461	17.8275	17.4733	16.888	16.0796	15.0586	13.8385	12.4355	10.8681	9.15711	7.32504	5.39615	3.39592	1.35081	-0.712161	-2.76572	-4.78271	-6.73649	-8.60122	-10.3523	-11.9665	-13.4225	-14.7011	-15.7853	-16.6609	-17.3163	-17.7428	-17.9347	-17.8896	-17.608	-17.0937	-16.3534	-15.3969	-14.2369	-12.8888	-11.3702	-9.70137	-7.90429	-6.00272	-4.02181	-1.98774	0.0726103	2.132
0.46216	57.4913	447.7	17.8019				17.8019	17.6832	17.3287	16.7432	15.9343	14.913	13.6929	12.2901	10.7235	9.01384	7.18401	5.25838	3.26264	1.22338	-0.832179	-2.87665	-4.88275	-6.82375	-8.67376	-10.4081	-12.0037	-13.4392	-14.6954	-15.7558	-16.606	-17.2348	-17.6338	-17.7976	-17.7241	-17.4143	-16.8722	-16.1052	-15.1234	-13.9399	-12.5706	-11.0336	-9.34955	-7.54078	-5.63146	-3.64704	-1.614	0.44057	2.48926
0.46418	57.5346	436.113	17.5752				17.5752	17.457	17.104	16.5209	15.7156	14.6989	13.4844	12.0886	10.5302	8.83009	7.01124	5.09807	3.11633	1.09267	-0.945683	-2.97132	-4.95699	-6.87598	-8.70248	-10.4119	-11.9813	-13.3895	-14.6176	-15.6491	-16.4701	-17.0695	-17.4394	-17.5746	-17.4735	-17.1373	-16.5706	-15.781	-14.7791	-13.5784	-12.1951	-10.6477	-8.95709	-7.14601	-5.2388	-3.26113	-1.23959	0.798626	2.8261
0.46621	57.4759	423.799	17.3057				17.3057	17.1883	16.8377	16.2586	15.4589	14.4494	13.2438	11.8585	10.3124	8.62626	6.82311	4.92737	2.96477	0.961943	-1.05394	-3.05552	-5.01563	-6.90769	-8.70602	-10.3862	-11.9255	-13.3029	-14.4999	-15.5001	-16.2899	-16.8587	-17.1988	-17.3055	-17.1774	-16.8162	-16.2268	-15.4172	-14.3984	-13.1843	-11.7913	-10.2382	-8.54625	-6.73832	-4.83896	-2.87394	-0.869922	1.1459	3.14617
0.46823	56.9093	413.703	17.1496				17.1496	17.0322	16.6818	16.103	15.3038	14.2951	13.0908	11.7073	10.1636	8.48077	6.68187	4.79151	2.83558	0.840831	-1.16542	-3.15573	-5.10284	-6.98011	-8.76184	-10.4237	-11.9428	-13.2985	-14.4722	-15.4478	-16.2119	-16.7542	-17.0672	-17.1465	-16.9912	-16.6033	-15.9882	-15.1543	-14.1129	-12.8784	-11.4676	-9.89989	-8.19665	-6.38123	-4.47847	-2.51441	-0.515936	1.4896	3.47474
0.47025	56.7902	403.654	16.9619				16.9619	16.8448	16.4952	15.9178	15.1208	14.1149	12.9142	11.5353	9.99707	8.32085	6.52975	4.64852	2.70311	0.720389	-1.27228	-3.24738	-5.17766	-7.03646	-8.79811	-10.4383	-11.9344	-13.2658	-14.414	-15.3632	-16.1003	-16.6152	-16.9007	-16.9529	-16.771	-16.3576	-15.7184	-14.8623	-13.8009	-12.549	-11.1239	-9.5452	-7.83474	-6.01612	-4.11444	-2.15597	-0.167733	1.82282	3.78821
0.47227	56.4272	395.228	16.8541				16.8541	16.7368	16.3864	15.8079	15.0092	14.0016	12.799	11.4182	9.87846	8.20114	6.40963	4.52888	2.58506	0.60525	-1.38299	-3.35197	-5.27428	-7.12315	-8.87284	-10.499	-11.9789	-13.2921	-14.4202	-15.3475	-16.0611	-16.5511	-16.8107	-16.8361	-16.6272	-16.1867	-15.5208	-14.6389	-13.5531	-12.2786	-10.8331	-9.23683	-7.51193	-5.68242	-3.7738	-1.81263	0.17378	2.15777	4.11171
0.4743	56.1176	384.536	16.6204				16.6204	16.5037	16.1552	15.5798	14.7857	13.7839	12.5885	11.2164	9.6867	8.02099	6.24264	4.37662	2.44914	0.487261	-1.48146	-3.42938	-5.32913	-7.15405	-8.87849	-10.4783	-11.9309	-13.2159	-14.3154	-15.2138	-15.8986	-16.3601	-16.5918	-16.5905	-16.3563	-15.8923	-15.2052	-14.3045	-13.2029	-11.9159	-10.4616	-8.86036	-7.13469	-5.30882	-3.4084	-1.46011	0.508687	2.47034	4.3973
0.47632	56.3087	374.305	16.3688				16.3688	16.2529	15.9068	15.3354	14.5468	13.5521	12.3656	11.0038	9.48628	7.83436	6.07147	4.2226	2.31392	0.372462	-1.57427	-3.4987	-5.37358	-7.17235	-8.86954	-10.4411	-11.8648	-13.1204	-14.1902	-15.0591	-15.7146	-16.1476	-16.3519	-16.3245	-16.066	-15.5799	-14.8732	-13.9558	-12.8407	-11.5438	-10.0834	-8.48014	-6.75679	-4.93775	-3.04877	-1.11661	0.831358	2.76756	4.66456
0.47834	56.3929	364.931	16.1531				16.1531	16.0377	15.6933	15.1247	14.3401	13.3506	12.1705	10.8165	9.308	7.66657	5.91563	4.08019	2.18648	0.261529	-1.66715	-3.57202	-5.42587	-7.20222	-8.87569	-10.4224	-11.8202	-13.0492	-14.0918	-14.9331	-15.5612	-15.9669	-16.1446	-16.0917	-15.809	-15.3004	-14.5733	-13.638	-12.508	-11.1992	-9.73055	-8.12288	-6.39918	-4.58408	-2.7035	-0.784312	1.14608	3.06011	4.93043
0.48036	56.4131	354.508	15.8716				15.8716	15.7573	15.416	14.8527	14.0754	13.0954	11.9267	10.5863	9.09334	7.46941	5.73789	3.92373	2.05304	0.152783	-1.74968	-3.62693	-5.45194	-7.19842	-8.84122	-10.3567	-11.7229	-12.9203	-13.9316	-14.7422	-15.3405	-15.7178	-15.8687	-15.791	-15.4859	-14.9577	-14.214	-13.2656	-12.1261	-10.812	-9.34208	-7.73763	-6.02172	-4.21907	-2.35565	-0.458293	1.44566	3.32879	5.16397
0.48239	55.6149	344.941	15.6668				15.6668	15.553	15.2133	14.6526	13.879	12.9039	11.7413	10.4081	8.92378	7.3098	5.58964	3.78828	1.9319	0.047452	-1.83769	-3.69613	-5.50088	-7.22573	-8.84561	-10.337	-11.6782	-12.8498	-13.8348	-14.6187	-15.1904	-15.5413	-15.6665	-15.5641	-15.2357	-14.6859	-13.9228	-12.9575	-11.8039	-10.4789	-9.00162	-7.39361	-5.6782	-3.8803	-2.02604	-0.142354	1.7434	3.60384	5.41192
0.48441	55.2342	336.804	15.5038				15.5038	15.3903	15.0513	14.4918	13.7201	12.7474	11.588	10.2588	8.77939	7.17136	5.45828	3.66525	1.81853	-0.0548241	-1.92738	-3.7717	-5.56077	-7.26839	-8.86954	-10.3408	-11.6605	-12.8095	-13.7708	-14.5304	-15.0772	-15.4031	-15.5034	-15.3766	-15.0246	-14.4525	-13.6687	-12.6847	-11.5149	-10.1764	-8.6888	-7.07397	-5.35552	-3.55862	-1.7096	0.16447	2.03613	3.87796	5.66298
0.48643	55.0297	328.585	15.3153				15.3153	15.2022	14.8646	14.3074	13.5389	12.5704	11.4162	10.0934	8.62158	7.02238	5.31946	3.53797	1.70422	-0.1547	-2.01133	-3.83826	-5.6085	-7.29589	-8.87553	-10.3241	-11.6201	-12.7445	-13.6807	-14.4148	-14.9361	-15.2367	-15.3122	-15.1616	-14.787	-14.1941	-13.3915	-12.3911	-11.2076	-9.85869	-8.36412	-6.746	-5.02825	-3.23623	-1.39641	0.464037	2.31763	4.13699	5.89524
0.48845	55.1446	322.094	15.1953				15.1953	15.0822	14.7444	14.187	13.4184	12.4499	11.296	9.97388	8.50321	6.90591	5.20575	3.42806	1.59932	-0.253236	-2.10202	-3.91951	-5.67861	-7.35315	-8.91818	-10.3504	-11.6285	-12.7333	-13.6486	-14.3606	-14.8587	-15.1355	-15.1869	-15.0121	-14.6138	-13.9978	-13.1733	-12.1527	-10.951	-9.5863	-8.0788	-6.45099	-4.7271	-2.93281	-1.09485	0.759427	2.60239	4.40659	6.14517
0.49048	55.8543	315.634	15.0345				15.0345	14.9216	14.5847	14.0287	13.2621	12.2963	11.1458	9.82799	8.36258	6.7716	5.07892	3.30997	1.49132	-0.349727	-2.18552	-3.9885	-5.73158	-7.38859	-8.93465	-10.3465	-11.603	-12.6853	-13.5771	-14.265	-14.7387	-14.991	-15.0183	-14.82	-14.3991	-13.7621	-12.9183	-11.8806	-10.6645	-9.28818	-7.77242	-6.13995	-4.41527	-2.62428	-0.79389	1.04842	2.87499	4.65839	6.37183
0.4925	56.0585	307.137	14.7718				14.7718	14.66	14.3262	13.7755	13.0163	12.0599	10.921	9.6167	8.16681	6.59327	4.9199	3.17204	1.37616	-0.440559	-2.25061	-4.02658	-5.74159	-7.36967	-8.88617	-10.2681	-11.4946	-12.5471	-13.4095	-14.069	-14.5154	-14.7421	-14.7456	-14.5258	-14.0861	-13.4331	-12.5767	-11.5299	-10.3085	-8.93106	-7.4184	-5.79341	-4.08071	-2.30622	-0.496816	1.32011	3.11705	4.86679	6.54285
0.49452	55.5987	298.553	14.5298				14.5298	14.4189	14.0879	13.5418	12.7891	11.8411	10.7123	9.42008	7.98401	6.42607	4.77004	3.04119	1.26592	-0.528676	-2.3152	-4.06638	-5.7555	-7.35675	-8.8457	-10.1996	-11.3979	-12.4221	-13.2567	-13.889	-14.3092	-14.511	-14.4913	-14.2504	-13.792	-13.123	-12.2537	-11.1974	-9.9701	-8.59064	-7.08004	-5.46136	-3.75932	-1.99989	-0.209933	1.58323	3.35222	5.07005	6.71047
0.49655	55.1469	292.576	14.434				14.434	14.3229	13.9914	13.4446	12.6908	11.7417	10.6119	9.31885	7.88233	6.32449	4.66932	2.94229	1.16998	-0.620342	-2.40112	-4.14493	-5.82496	-7.41534	-8.8916	-10.231	-11.413	-12.4193	-13.2344	-13.8459	-14.2443	-14.4235	-14.3806	-14.1165	-13.6351	-12.9439	-12.0534	-10.9774	-9.73253	-8.33784	-6.81482	-5.18692	-3.47919	-1.71791	0.0698027	1.85644	3.61451	5.31695	6.93756
0.49857	55.2884	287.525	14.3494				14.3494	14.2381	13.9059	13.3579	12.6026	11.6519	10.5203	9.22548	7.78754	6.22877	4.57335	2.84698	1.07643	-0.710812	-2.48703	-4.22466	-5.89674	-7.47733	-8.94191	-10.2677	-11.4343	-12.4234	-13.2197	-13.811	-14.1879	-14.3448	-14.279	-13.9917	-13.4873	-12.7737	-11.8619	-10.766	-9.50304	-8.09267	-6.55673	-4.91906	-3.20507	-1.44136	0.344727	2.12546	3.87322	5.56088	7.16226
0.50059	55.0226	280.215	14.1411				14.1411	14.0305	13.7004	13.1561	12.4059	11.4618	10.3383	9.05317	7.6264	6.08035	4.43919	2.7286	0.975331	-0.793197	-2.54932	-4.26556	-5.91509	-7.47209	-8.91222	-10.213	-11.3539	-12.3173	-13.0881	-13.6541	-14.0065	-14.1399	-14.0521	-13.7445	-13.2219	-12.4925	-11.5677	-10.462	-9.1926	-7.77944	-6.2446	-4.61209	-2.90743	-1.1573	0.61093	2.36961	4.09122	5.74884	7.31654
0.50261	54.3736	272.801	13.939				13.939	13.8291	13.5012	12.9603	12.2152	11.2774	10.1618	8.88591	7.46996	5.93622	4.30888	2.6136	0.877109	-0.873212	-2.60976	-4.30517	-5.93268	-7.46666	-8.8829	-10.1591	-11.2751	-12.2133	-12.9589	-13.5002	-13.8286	-13.939	-13.8296	-13.5021	-12.9618	-12.217	-11.2797	-10.1644	-8.88892	-7.47325	-5.93975	-4.31259	-2.61744	-0.881006	0.869314	2.60593	4.30145	5.92915	7.46336
0.50464	54.113	265.776	13.7269				13.7269	13.6178	13.2922	12.7554	12.0158	11.0852	9.97844	8.71304	7.30915	5.78908	4.17699	2.49851	0.780313	-0.950288	-2.66578	-4.33891	-5.94306	-7.45275	-8.84397	-10.0946	-11.1848	-12.0972	-12.8173	-13.3337	-13.6382	-13.7258	-13.5953	-13.2487	-12.6915	-11.9325	-10.9839	-9.86071	-8.58077	-7.16443	-5.63421	-4.01444	-2.33085	-0.610219	1.12012	2.83265	4.50015	6.09612	7.5952
0.50666	53.793	259.543	13.5583				13.5583	13.4497	13.1256	12.5912	11.855	10.9289	9.82767	8.56898	7.17299	5.66208	4.06044	2.39374	0.688689	-1.0274	-2.72702	-4.38295	-5.96866	-7.45873	-8.82929	-10.0584	-11.1263	-12.016	-12.7131	-13.2066	-13.4884	-13.5541	-13.4026	-13.0364	-12.4614	-11.6866	-10.7246	-9.5908	-8.30331	-6.88277	-5.35195	-3.73538	-2.05896	-0.349549	1.36546	3.05859	4.70272	6.2715	7.73979
0.50868	53.3629	254.991	13.4999				13.4999	13.3909	13.0656	12.5293	11.7906	10.8616	9.75708	8.495	7.09573	5.58186	3.97784	2.30957	0.604004	-1.11132	-2.80869	-4.4607	-6.04067	-7.52308	-8.88399	-10.1014	-11.1557	-12.0298	-12.7096	-13.1842	-13.4458	-13.4903	-13.3169	-12.9285	-12.3312	-11.5348	-10.552	-9.3989	-8.09397	-6.65832	-5.11513	-3.48933	-1.80718	-0.0958347	1.61705	3.30383	4.93724	6.49092	7.93976
0.5107	53.4964	249.569	13.3377				13.3377	13.2291	12.9052	12.3712	11.6358	10.711	9.61187	8.35623	6.96457	5.45954	3.86562	2.20879	0.515991	-1.1852	-2.86711	-4.50233	-6.06427	-7.52749	-8.86817	-10.0645	-11.097	-11.9488	-12.6061	-13.0582	-13.2978	-13.3208	-13.127	-12.7196	-12.105	-11.2935	-10.298	-9.13496	-7.82318	-6.38405	-4.841	-3.21914	-1.54488	0.154527	1.85142	3.51818	5.12766	6.65367	8.07137
0.51273	53.7719	244.776	13.2007				13.2007	13.0924	12.7693	12.2366	11.5032	10.581	9.48523	8.23381	6.84728	5.34839	3.76175	2.11339	0.43035	-1.25975	-2.92918	-4.55055	-6.09726	-7.54391	-8.86679	-10.0442	-11.0568	-11.8879	-12.524	-12.9546	-13.1726	-13.1745	-12.9603	-12.5333	-11.9007	-11.0729	-10.0634	-8.8887	-7.56819	-6.1235	-4.57833	-2.95805	-1.28922	0.400758	2.08416	3.73337	5.32131	6.82195	8.21064
0.51475	54.4812	239.835	13.0133				13.0133	12.9057	12.5846	12.0555	11.327	10.4111	9.32311	8.0809	6.70506	5.21834	3.64531	2.012	0.345414	-1.32688	-2.97724	-4.57835	-6.10375	-7.52821	-8.82817	-9.98214	-10.971	-11.7785	-12.3911	-12.7989	-12.9949	-12.9761	-12.7427	-12.2985	-11.651	-10.8108	-9.79176	-8.61082	-7.28747	-5.84361	-4.30311	-2.69144	-1.03527	0.638027	2.30077	3.92547	5.48524	6.95431	8.30837
0.51677	53.9865	234.785	12.8939				12.8939	12.7864	12.4658	11.9375	11.2102	10.296	9.21025	7.97097	6.59883	5.11671	3.5493	1.92274	0.264129	-1.39888	-3.03858	-4.62763	-6.13955	-7.54914	-8.83291	-9.96945	-10.9398	-11.7279	-12.3204	-12.7076	-12.883	-12.8437	-12.5903	-12.1271	-11.4617	-10.6053	-9.57213	-8.37941	-7.04703	-5.5972	-4.05407	-2.44337	-0.791945	0.872679	2.52276	4.13079	5.66997	7.11464	8.44074
0.51879	52.9305	229.164	12.766				12.766	12.6588	12.3389	11.8118	11.0862	10.1745	9.09179	7.85639	6.48902	5.01265	3.45208	1.83352	0.18416	-1.46829	-3.09608	-4.67186	-6.16917	-7.56284	-8.82948	-9.9478	-10.899	-11.6671	-12.2393	-12.6059	-12.7607	-12.7011	-12.4282	-11.9466	-11.2642	-10.3927	-9.34654	-8.1434	-6.80348	-5.34927	-3.8052	-2.19722	-0.552326	1.10184	2.73751	4.32719	5.84418	7.263	8.55981
0.52082	52.7257	224.803	12.6612				12.6612	12.554	12.2343	11.7075	10.9825	10.0715	8.99005	7.7564	6.39143	4.91827	3.36184	1.74849	0.105547	-1.53919	-3.15786	-4.72307	-6.20833	-7.58848	-8.84017	-9.94219	-10.8759	-11.6255	-12.1783	-12.5249	-12.6594	-12.5797	-12.287	-11.7862	-11.086	-10.198	-9.13744	-7.92216	-6.57276	-5.11209	-3.56488	-1.95731	-0.31661	1.32945	2.95301	4.52657	6.0235	7.41846	8.68782
0.52284	52.7783	220.529	12.5354				12.5354	12.4285	12.1095	11.5839	10.8607	9.95224	8.87396	7.64427	6.28417	4.81686	3.26737	1.66213	0.0285347	-1.60555	-3.21224	-4.76412	-6.23473	-7.59896	-8.83356	-9.91744	-10.8321	-11.562	-12.0946	-12.4209	-12.5353	-12.4358	-12.1241	-11.6056	-10.8891	-9.98684	-8.91417	-7.68942	-6.33349	-4.8695	-3.32243	-1.71868	-0.0856034	1.54893	3.15704	4.71129	6.18515	7.5535	8.79297
0.52486	53.0231	216.265	12.3881				12.3881	12.2816	11.964	11.4407	10.7206	9.81627	8.74315	7.51971	6.16699	4.70824	3.16854	1.57437	-0.0468726	-1.66731	-3.25908	-4.79481	-6.24812	-7.59399	-8.80931	-9.87318	-10.7673	-11.4763	-11.988	-12.2936	-12.3878	-12.269	-11.9393	-11.4044	-10.6733	-9.75881	-8.67649	-7.445	-6.08551	-4.62139	-3.07782	-1.48134	0.140615	1.76015	3.34943	4.88111	6.32888	7.66784	8.87497
0.52688	52.6358	211.813	12.2667				12.2667	12.1604	11.8435	11.3214	10.6031	9.70111	8.63106	7.41148	6.0635	4.61046	3.07755	1.49132	-0.120747	-1.73072	-3.31071	-4.83335	-6.27224	-7.60247	-8.80098	-9.84702	-10.7225	-11.4121	-11.9041	-12.1898	-12.2643	-12.1264	-11.7783	-11.2262	-10.4796	-9.55144	-8.4578	-7.21762	-5.85241	-4.38579	-2.8432	-1.25134	0.362195	1.96946	3.54259	5.05436	6.47855	7.79051	8.96749
0.52891	52.7967	207.308	12.0917				12.0917	11.9862	11.6714	11.1528	10.4395	9.54394	8.48176	7.2715	5.93429	4.49348	2.97422	1.40303	-0.192658	-1.78498	-3.34614	-4.84887	-6.26696	-7.57563	-8.75204	-9.77565	-10.6286	-11.296	-11.7661	-12.0309	-12.0856	-11.9293	-11.5647	-10.9983	-10.2398	-9.30253	-8.20287	-6.95999	-5.5956	-4.13352	-2.59928	-1.01965	0.577777	2.16512	3.71466	5.19935	6.59326	7.87206	9.01343
0.53093	53.1606	203.123	11.9161				11.9161	11.8112	11.4986	10.9838	10.2757	9.38677	8.33276	7.13216	5.80608	4.37787	2.87264	1.31688	-0.262057	-1.83638	-3.37839	-4.86098	-6.25805	-7.54502	-8.69927	-9.70047	-10.531	-11.1763	-11.625	-11.8692	-11.9045	-11.7305	-11.3501	-10.77	-10.0004	-9.05492	-7.95013	-6.70549	-5.34289	-3.88629	-2.36133	-0.794824	0.785663	2.35233	3.87761	5.33468	6.6979	7.94329	9.04894
0.53295	53.0521	199.888	11.8461				11.8461	11.7412	11.428	10.9123	10.2032	9.31324	8.25817	7.05672	5.73018	4.30206	2.79769	1.24373	-0.332284	-1.9024	-3.4388	-4.91425	-6.30258	-7.57919	-8.72146	-9.70912	-10.5247	-11.1537	-11.585	-11.8109	-11.8275	-11.6344	-11.2351	-10.6367	-9.84965	-8.88805	-7.7689	-6.51204	-5.13974	-3.67634	-2.14777	-0.581134	0.995807	2.5551	4.06909	5.51096	6.85514	8.07781	9.15729
0.53497	53.1265	196.335	11.7297				11.7297	11.6249	11.3126	10.7981	10.0908	9.20334	8.15146	6.95399	5.63232	4.21005	2.71259	1.16668	-0.400065	-1.95967	-3.48427	-4.94664	-6.32066	-7.58179	-8.7075	-9.6777	-10.4751	-11.0853	-11.4976	-11.7045	-11.7024	-11.4912	-11.0749	-10.4607	-9.65969	-8.68616	-7.55749	-6.29383	-4.91777	-3.45388	-1.92829	-0.368269	1.19833	2.74353	4.23973	5.6602	6.97958	8.17431	9.22303
0.537	52.9501	192.029	11.5654				11.5654	11.4613	11.151	10.64	9.9375	9.05619	8.01191	6.82344	5.51218	4.10172	2.61745	1.08608	-0.464844	-2.0074	-3.51383	-4.95702	-6.31101	-7.55143	-8.65595	-9.6047	-10.3806	-10.9697	-11.3614	-11.5486	-11.528	-11.2999	-10.8685	-10.2415	-9.43018	-8.44916	-7.31609	-6.05136	-4.67773	-3.21992	-1.70416	-0.157735	1.39153	2.91575	4.3875	5.78029	7.06906	8.23062	9.24406
0.53902	52.9826	188.043	11.4011				11.4011	11.2977	10.9895	10.4821	9.78456	8.90963	7.87317	6.69395	5.39336	3.99498	2.52416	1.00758	-0.527268	-2.05256	-3.54063	-4.96451	-6.29837	-7.51804	-8.60139	-9.52879	-10.2834	-10.8516	-11.223	-11.3909	-11.3523	-11.1079	-10.662	-10.0229	-9.20199	-8.21426	-7.07759	-5.81259	-4.4422	-2.99127	-1.4861	0.0460149	1.57729	3.07997	4.52681	5.89157	7.14951	8.27781	9.25603
0.54104	53.0307	184.872	11.2972				11.2972	11.194	10.8863	10.3798	9.68362	8.81058	7.7766	6.60055	5.30393	3.91043	2.44549	0.935871	-0.590839	-2.10676	-3.58419	-4.99615	-6.31684	-7.52214	-8.59003	-9.501	-10.2384	-10.7888	-11.1421	-11.2919	-11.2354	-10.9736	-10.5114	-9.85717	-9.02289	-8.02377	-6.87808	-5.60675	-4.233	-2.78192	-1.28003	0.245254	1.76605	3.25459	4.68368	6.0272	7.26063	8.36142	9.30947
0.54306	52.8045	181.262	11.1725				11.1725	11.0697	10.7632	10.2585	9.56513	8.69568	7.6662	6.49563	5.20552	3.8196	2.36339	0.863681	-0.651921	-2.15553	-3.61946	-5.01678	-6.32178	-7.51043	-8.56086	-9.45373	-10.1726	-10.7043	-11.039	-11.1705	-11.0964	-10.8181	-10.3408	-9.67308	-8.82738	-7.81921	-6.66714	-5.39237	-4.01836	-2.5704	-1.07513	0.439927	1.94689	3.41801	4.82624	6.14564	7.35194	8.42294	9.33892
0.54509	52.4699	178.483	11.1247				11.1247	11.0216	10.7141	10.208	9.51255	8.64075	7.60875	6.43566	5.14325	3.75548	2.29807	0.798057	-0.716756	-2.21828	-3.67867	-5.07086	-6.36902	-7.54909	-8.5892	-9.47004	-10.1753	-10.6919	-11.0102	-11.1244	-11.0324	-10.7358	-10.2401	-9.55455	-8.69185	-7.66799	-6.50196	-5.21537	-3.83208	-2.37774	-0.879315	0.635416	2.13837	3.60167	4.99819	6.30204	7.48904	8.53718	9.42703
0.54711	52.3159	175.684	11.0535				11.0535	10.9503	10.6425	10.136	9.44006	8.56784	7.53558	6.36256	5.07069	3.68411	2.22872	0.731693	-0.779	-2.27514	-3.72879	-5.11278	-6.40127	-7.5702	-8.59772	-9.46464	-10.1548	-10.6552	-10.9567	-11.0534	-10.9437	-10.6296	-10.1169	-9.41531	-8.5378	-7.50082	-6.32372	-5.02851	-3.63937	-2.18225	-0.684372	0.826292	2.32152	3.77339	5.15477	6.43987	7.60468	8.62744	9.48905
0.54913	52.1262	172.891	10.9809				10.9809	10.8776	10.5696	10.0627	9.36651	8.49403	7.46171	6.28899	4.99793	3.61283	2.15974	0.666011	-0.840249	-2.3307	-3.77729	-5.15281	-6.43136	-7.5889	-8.60364	-9.45648	-10.1314	-10.6156	-10.9002	-10.9796	-10.8524	-10.5209	-9.99156	-9.27417	-8.38227	-7.33264	-6.14503	-4.8418	-3.44745	-1.98823	-0.491606	1.01427	2.50107	3.9408	5.30638	6.5721	7.71417	8.71107	9.54406
0.55116	51.9759	170.962	10.9801				10.9801	10.876	10.5658	10.0553	9.35416	8.47571	7.43659	6.25651	4.95782	3.56516	2.10491	0.604768	-0.906842	-2.40126	-3.85016	-5.22608	-6.50293	-7.65652	-8.66496	-9.50915	-10.1731	-10.6442	-10.9135	-10.9759	-10.8303	-10.4794	-9.92985	-9.19205	-8.28001	-7.21101	-6.00532	-4.68579	-3.27744	-1.80696	-0.302233	1.20823	2.69578	4.13224	5.49037	6.74442	7.87062	8.84762	9.65691
0.55318	52.2564	169.039	10.9356				10.9356	10.8312	10.52	10.0079	9.30467	8.42378	7.38204	6.19935	4.89827	3.50367	2.04216	0.541653	-0.969194	-2.46153	-3.90687	-5.27761	-6.54757	-7.6925	-8.69055	-9.52264	-10.1729	-10.6289	-10.882	-10.9272	-10.7638	-10.3949	-9.82748	-9.0724	-8.14408	-7.06025	-5.84161	-4.51142	-3.09508	-1.61964	-0.11328	1.39525	2.87713	4.30408	5.64884	6.88573	7.99114	8.94396	9.726
0.5552	52.1209	165.395	10.7628				10.7628	10.6593	10.3508	9.84317	9.14621	8.27333	7.24131	6.07002	4.78196	3.40193	1.95647	0.473373	-1.01883	-2.49143	-3.91612	-5.26548	-6.51356	-7.63635	-8.61226	-9.42252	-10.0515	-10.4872	-10.7212	-10.749	-10.57	-10.1876	-9.60938	-8.84629	-7.91304	-6.82759	-5.61081	-4.28611	-2.87897	-1.41646	0.0733054	1.56166	3.01997	4.42019	5.7354	6.94029	8.01168	8.92897	9.67452
0.55722	51.9889	161.065	10.5157				10.5157	10.4138	10.1102	9.61067	8.92496	8.06633	7.05142	5.89989	4.63405	3.27843	1.8593	0.404137	-1.05885	-2.50133	-3.89534	-5.21388	-6.43141	-7.52433	-8.47147	-9.25448	-9.85819	-10.2709	-10.4846	-10.4952	-10.3024	-9.91008	-9.32572	-8.56067	-7.62977	-6.55104	-5.34539	-4.03617	-2.64876	-1.21002	0.252153	1.70944	3.13362	4.49707	5.7734	6.93788	7.96793	8.84361	9.54795
0.55925	52.1685	158.536	10.4048				10.4048	10.3033	10.0007	9.50289	8.81966	7.96431	6.95353	5.80705	4.54723	3.19868	1.7877	0.341828	-1.11071	-2.54157	-3.92284	-5.22754	-6.43023	-7.50742	-8.43811	-9.20411	-9.7905	-10.1858	-10.3823	-10.3763	-10.1677	-9.76065	-9.16314	-8.38682	-7.44681	-6.36148	-5.152	-3.84197	-2.45696	-1.02401	0.428931	1.8735	3.28151	4.62547	5.87917	7.01813	8.02012	8.8656	9.53806
0.56127	51.9938	156.916	10.4125				10.4125	10.3102	10.0052	9.50348	8.81501	7.95325	6.93517	5.78076	4.51272	3.15597	1.73719	0.284266	-1.17425	-2.60968	-3.99382	-5.29945	-6.50091	-7.57459	-8.49937	-9.25708	-9.83283	-10.2153	-10.397	-10.3743	-10.1476	-9.72155	-9.10436	-8.30821	-7.34875	-6.24483	-5.01816	-3.69286	-2.29496	-0.851949	0.607806	2.05561	3.46302	4.80235	6.04728	7.17334	8.1584	8.98309	9.6312
0.56329	51.7659	154.193	10.312				10.312	10.21	9.90574	9.4054	8.71886	7.85969	6.84492	5.69463	4.4316	3.08083	1.66907	0.224257	-1.22499	-2.64999	-4.02252	-5.31541	-6.50307	-7.56198	-8.47117	-9.21265	-9.77174	-10.1374	-10.3023	-10.2632	-10.021	-9.58036	-8.95005	-8.14254	-7.17382	-6.06308	-4.8323	-3.50585	-2.10998	-0.672347	0.778601	2.21413	3.60583	4.92614	6.14892	7.24996	8.20746	9.00247	9.61925
0.56531	51.4371	151.781	10.2479				10.2479	10.1458	9.84129	9.34057	8.65359	7.79407	6.77912	5.629	4.36664	3.0172	1.6076	0.165946	-1.27902	-2.69848	-4.06413	-5.34874	-6.5267	-7.57451	-8.47129	-9.19915	-9.74357	-10.0937	-10.2426	-10.1872	-9.92868	-9.47219	-8.82682	-8.00544	-7.02443	-5.90335	-4.66456	-3.33276	-1.9345	-0.497664	0.949094	2.37693	3.75736	5.06288	6.26744	7.34702	8.2801	9.04808	9.63563
0.56734	51.1606	150.659	10.3083				10.3083	10.2048	9.89636	9.38915	8.69337	7.82299	6.79551	5.63154	4.35447	2.98996	1.56539	0.109383	-1.34882	-2.77993	-4.15522	-5.44705	-6.62948	-7.67878	-8.57385	-9.29674	-9.83291	-10.1716	-10.306	-10.2335	-9.95536	-9.47733	-8.80897	-7.96369	-6.95847	-5.8135	-4.55177	-3.19863	-1.78125	-0.3281	1.13164	2.56866	3.95409	5.2601	6.46048	7.5311	8.45048	9.20014	9.76503
0.56936	51.5128	149.341	10.2804				10.2804	10.1765	9.86665	9.35728	8.65865	7.78488	6.75365	5.58582	4.305	2.93711	1.50982	0.051981	-1.40691	-2.83733	-4.21037	-5.49825	-6.67492	-7.71658	-8.60216	-9.31375	-9.83695	-10.1612	-10.2799	-10.1907	-9.89535	-9.39986	-8.71425	-7.85238	-6.83168	-5.67281	-4.39919	-3.03659	-1.61257	-0.155938	1.30385	2.73727	4.11532	5.41013	6.59551	7.64749	8.54479	9.26926	9.80624
0.57138	51.4656	146.528	10.1323				10.1323	10.0291	9.7216	9.21608	8.52283	7.65597	6.63316	5.47523	4.20576	2.85063	1.43743	-0.0050527	-1.44743	-2.86033	-4.21495	-5.48373	-6.64079	-7.66259	-8.52829	-9.22028	-9.72445	-10.0305	-10.1323	-10.0277	-9.71875	-9.21188	-8.51736	-7.64935	-6.62551	-5.46672	-4.19657	-2.84093	-1.42742	0.0151581	1.45743	2.87002	4.22414	5.49222	6.64842	7.66919	8.53375	9.22446	9.72728
0.5734	51.2729	143.024	9.91837				9.91837	9.81664	9.51353	9.01525	8.33204	7.47791	6.47037	5.33009	4.08048	2.74716	1.35748	-0.0600422	-1.47633	-2.86234	-4.18963	-5.43097	-6.5609	-7.55624	-8.39657	-9.06466	-9.54679	-9.83308	-9.91765	-9.79877	-9.47887	-8.96453	-8.26629	-7.39847	-6.37888	-5.22843	-3.97073	-2.63157	-1.23843	0.180118	1.59497	2.9771	4.29817	5.53105	6.65048	7.63347	8.45988	9.11273	9.57865
0.57543	50.9272	140.247	9.79299				9.79299	9.69183	9.39045	8.89506	8.21591	7.36702	6.36594	5.23334	3.99262	2.66942	1.29107	-0.11395	-1.51662	-2.88796	-4.19963	-5.42454	-6.53739	-7.51517	-8.3377	-8.98798	-9.45257	-9.72188	-9.79034	-9.65654	-9.32324	-8.79733	-8.08967	-7.21489	-6.19105	-5.03931	-3.78346	-2.44944	-1.06483	0.341789	1.74134	3.10492	4.40436	5.6128	6.70529	7.65925	8.45497	9.07603	9.50957
0.57745	51.2349	139.157	9.77592				9.77592	9.67423	9.37127	8.87335	8.19083	7.3379	6.33231	5.19498	3.94957	2.62199	1.23987	-0.168051	-1.57248	-2.94418	-4.25464	-5.47658	-6.58459	-7.55561	-8.36944	-9.00914	-9.46142	-9.71686	-9.77014	-9.62017	-9.27005	-8.72708	-8.00254	-7.11152	-6.07254	-4.90723	-3.63983	-2.2967	-0.905797	0.503955	1.90322	3.26289	4.55468	5.75172	6.82909	7.76439	8.53815	9.13428	9.54038
0.57947	51.338	138.582	9.83688				9.83688	9.73383	9.42687	8.92241	8.23103	7.36722	6.34905	5.19788	3.93781	2.59524	1.19831	-0.223732	-1.64109	-3.02406	-4.34368	-5.5723	-6.68418	-7.65602	-8.46748	-9.10154	-9.54492	-9.78834	-9.8267	-9.65918	-9.28931	-8.72483	-7.97756	-7.06316	-6.00079	-4.81271	-3.5238	-2.16106	-0.753052	0.670733	2.08047	3.44661	4.74056	5.93518	7.00547	7.92899	8.6864	9.26183	9.64323
0.58149	51.0834	136.814	9.8018				9.8018	9.69841	9.39042	8.88433	8.19082	7.32452	6.3037	5.14989	3.88745	2.54299	1.14489	-0.277365	-1.69377	-3.07444	-4.39026	-5.61345	-6.71823	-7.68128	-8.48228	-9.10434	-9.53434	-9.7632	-9.7861	-9.60255	-9.21642	-8.63587	-7.87313	-6.9443	-5.86898	-4.66984	-3.37219	-2.0034	-0.592343	0.831208	2.23722	3.59604	4.879	6.05903	7.11124	8.01343	8.74657	9.29519	9.64772
0.58352	50.8393	135.865	9.85768				9.85768	9.75298	9.44109	8.92864	8.22652	7.34963	6.31662	5.14943	3.87284	2.51398	1.10172	-0.333951	-1.76252	-3.15366	-4.47779	-5.70681	-6.81459	-7.77761	-8.57541	-9.19104	-9.61142	-9.82762	-9.83505	-9.63356	-9.22741	-8.62525	-7.83985	-6.88792	-5.78966	-4.56841	-3.25011	-1.86277	-0.435853	1.00032	2.41524	3.77885	5.06219	6.23799	7.28128	8.16989	8.88494	9.41125	9.73763
0.58554	51.1387	133.971	9.737				9.737	9.63286	9.32267	8.81306	8.11495	7.24325	6.21661	5.057	3.78922	2.44039	1.03935	-0.383915	-1.79897	-3.17554	-4.48419	-5.69692	-6.78779	-7.73347	-8.51373	-9.11187	-9.51511	-9.71482	-9.70672	-9.491	-9.07226	-8.45946	-7.66571	-6.70798	-5.60677	-4.38564	-3.07069	-1.69005	-0.273272	1.14936	2.5474	3.89095	5.15128	6.30142	7.31676	8.1756	8.85956	9.35402	9.64838
0.58756	51.6075	132.108	9.59414				9.59414	9.49082	9.18309	8.67757	7.98516	7.12076	6.103	4.95379	3.69789	2.36234	0.975916	-0.43153	-1.82968	-3.18843	-4.4785	-5.67211	-6.74356	-7.66977	-8.43079	-9.01022	-9.39559	-9.57861	-9.55532	-9.32622	-8.89626	-8.2747	-7.47491	-6.51413	-5.41305	-4.19538	-2.88736	-1.51714	-0.114254	1.2911	2.66864	3.98871	5.22287	6.34453	7.32955	8.15671	8.80819	9.26996	9.53207
0.58958	51.4948	130.497	9.54573				9.54573	9.44223	9.13396	8.62761	7.93417	7.06866	6.04986	4.89987	3.64362	2.30835	0.923024	-0.482319	-1.8772	-3.23138	-4.51548	-5.70165	-6.76418	-7.68002	-8.42932	-8.99581	-9.36723	-9.5355	-9.49699	-9.25253	-8.80741	-8.1713	-7.35799	-6.38511	-5.27376	-4.04805	-2.73455	-1.36175	0.040579	1.44203	2.81221	4.1214	5.34122	6.44521	7.40943	8.21296	8.83839	9.27215	9.50484
0.59161	51.338	128.79	9.48801				9.48801	9.38442	9.07593	8.56925	7.87547	7.00972	5.99091	4.84128	3.58595	2.25232	0.869506	-0.532294	-1.92247	-3.27067	-4.54745	-5.72494	-6.77742	-7.68192	-8.41867	-8.97161	-9.32864	-9.48199	-9.42829	-9.16872	-8.70895	-8.05901	-7.23311	-6.24927	-5.12897	-3.89668	-2.57931	-1.20561	0.194405	1.59018	2.95123	4.24784	5.4517	6.53652	7.47861	8.2574	8.85589	9.26101	9.46392
0.59363	50.9388	127.26	9.47781				9.47781	9.37363	9.06337	8.55386	7.8563	6.98603	5.96217	4.80723	3.54662	2.20803	0.820898	-0.584279	-1.97661	-3.32549	-4.60126	-5.77587	-6.8235	-7.72113	-8.44901	-8.99114	-9.33561	-9.47484	-9.40577	-9.12992	-8.65336	-7.98655	-7.14417	-6.14473	-5.0102	-3.76552	-2.43806	-1.057	0.347294	1.74396	3.10228	4.3924	5.58595	6.65671	7.58111	8.33886	8.91327	9.29174	9.46593
0.59565	50.8456	126.53	9.52734				9.52734	9.4219	9.10792	8.59234	7.88658	7.00626	5.97086	4.8033	3.52943	2.17744	0.777246	-0.640147	-2.04337	-3.40137	-4.68408	-5.86311	-6.91237	-7.80863	-8.53205	-9.06663	-9.40052	-9.52635	-9.44132	-9.14731	-8.65084	-7.96289	-7.09869	-6.07737	-4.92153	-3.65676	-2.31105	-0.914183	0.502915	1.90888	3.2726	4.56388	5.75414	6.81704	7.72905	8.46999	9.02345	9.37719	9.52337
0.59767	50.9525	125.63	9.52871				9.52871	9.42254	9.1064	8.58733	7.8769	6.99094	5.94919	4.77487	3.49415	2.13556	0.729388	-0.693041	-2.10003	-3.46022	-4.7433	-5.92068	-6.96612	-7.85633	-8.57147	-9.0956	-9.41705	-9.52864	-9.4279	-9.11707	-8.60307	-7.89735	-7.01566	-5.97762	-4.80638	-3.52804	-2.17107	-0.765725	0.656684	2.06446	3.42623	4.71165	5.89208	6.9412	7.83565	8.55549	9.08467	9.41142	9.52843
0.5997	50.6072	123.617	9.44315				9.44315	9.33722	9.0218	8.50398	7.79536	6.91186	5.87328	4.70294	3.42708	2.07433	0.675046	-0.739384	-2.13723	-3.48712	-4.75877	-5.92367	-6.95566	-7.8316	-8.53183	-9.04065	-9.34663	-9.44293	-9.32736	-9.00253	-8.47573	-7.75877	-6.86774	-5.82262	-4.64688	-3.36688	-2.01134	-0.610677	0.803687	2.20002	3.54699	4.81439	5.97377	6.99913	7.86746	8.55928	9.05907	9.35562	9.44226
0.60172	50.2401	122.326	9.44989				9.44989	9.34317	9.02542	8.50382	7.79014	6.90052	5.85503	4.6773	3.39392	2.03389	0.62792	-0.792233	-2.19449	-3.54719	-4.81976	-5.98347	-7.01204	-7.88223	-8.57439	-9.07288	-9.36645	-9.44846	-9.31706	-8.97522	-8.43067	-7.69569	-6.78689	-5.72481	-4.53341	-3.23963	-1.87267	-0.463416	0.956306	2.35443	3.69937	4.96076	6.1101	7.12144	7.97192	8.64235	9.11758	9.38687	9.44415
0.60374	50.215	121.764	9.50614				9.50614	9.39807	9.0763	8.54815	7.82563	6.92517	5.86725	4.67591	3.37826	2.00378	0.58375	-0.849557	-2.26355	-3.62607	-4.90614	-6.07465	-7.10504	-7.97387	-8.6614	-9.15197	-9.43445	-9.50241	-9.3543	-8.99348	-8.42818	-7.67123	-6.73985	-5.65523	-4.44201	-3.12779	-1.74245	-0.317484	1.1147	2.52153	3.87103	5.13251	6.27728	7.27933	8.11585	8.76783	9.22045	9.46341	9.4912
0.60577	50.3755	121.091	9.52231				9.52231	9.41333	9.08886	8.55634	7.82795	6.92038	5.85439	4.65438	3.34784	1.96466	0.536501	-0.903934	-2.32368	-3.69023	-4.97231	-6.14057	-7.16826	-8.03187	-8.71161	-9.19194	-9.46186	-9.51518	-9.3507	-8.97216	-8.38825	-7.61231	-6.66213	-5.55944	-4.32949	-3.00043	-1.60269	-0.168265	1.27001	2.67922	4.0271	5.28279	6.41755	7.40541	8.22375	8.85385	9.28126	9.49622	9.49381
0.60779	50.5759	119.19	9.36324				9.36324	9.25536	8.9342	8.40716	7.6864	6.78851	5.73418	4.54773	3.25647	1.89018	0.480323	-0.940598	-2.33984	-3.68517	-4.94558	-6.09202	-7.09808	-7.94058	-8.60009	-9.06143	-9.31396	-9.35186	-9.17426	-8.78525	-8.1938	-7.41353	-6.46243	-5.36241	-4.13882	-2.81986	-1.43591	-0.0188808	1.39859	2.78383	4.10491	5.33141	6.43505	7.39041	8.17546	8.77212	9.16664	9.34992	9.31775
0.60981	50.1645	117.463	9.30641				9.30641	9.19847	8.87716	8.34992	7.62899	6.7311	5.67706	4.49134	3.20143	1.83726	0.430466	-0.98631	-2.38021	-3.71889	-4.97131	-6.10841	-7.10381	-7.93443	-8.58099	-9.02851	-9.26659	-9.28971	-9.09735	-8.69395	-8.08889	-7.29618	-6.33423	-5.22535	-3.99525	-2.67248	-1.28771	0.126922	1.53861	2.91462	4.22301	5.43344	6.51783	7.45103	8.21139	8.78128	9.14746	9.30145	9.23968
0.61183	50.1631	116.78	9.33486				9.33486	9.22588	8.90146	8.3692	7.6415	6.73538	5.67198	4.47614	3.17578	1.80126	0.384687	-1.04087	-2.44213	-3.78636	-5.04217	-6.18025	-7.17402	-8.00028	-8.63972	-9.07742	-9.30316	-9.31167	-9.10274	-8.68126	-8.05708	-7.24475	-6.26326	-5.13552	-3.88786	-2.54942	-1.15145	0.273412	1.69189	3.07085	4.37812	5.58315	6.65781	7.57701	8.31928	8.8673	9.20826	9.3342	9.24219
0.61386	50.7005	115.977	9.26905				9.26905	9.16012	8.83587	8.30393	7.57681	6.67159	5.60955	4.41566	3.11798	1.74701	0.334969	-1.08494	-2.47935	-3.81548	-5.06192	-6.18939	-7.17137	-7.98478	-8.61051	-9.03385	-9.24484	-9.23853	-9.01507	-8.5797	-7.94267	-7.11894	-6.12788	-4.99278	-3.74032	-2.39994	-1.00316	0.417208	1.82777	3.19536	4.48785	5.67485	6.72846	7.62392	8.34017	8.86039	9.17234	9.26869	9.14718
0.61588	50.3755	115.409	9.35669				9.35669	9.246	8.91655	8.37614	7.63754	6.71824	5.63999	4.4283	3.11183	1.72174	0.290912	-1.1468	-2.55738	-3.90745	-5.16507	-6.30049	-7.28683	-8.10077	-8.72305	-9.13894	-9.3386	-9.31731	-9.07558	-8.61911	-7.95872	-7.11003	-6.09311	-4.93203	-3.65426	-2.29002	-0.871611	0.567425	1.99304	3.37149	4.67018	5.85837	6.90795	7.79409	8.49582	8.99654	9.2844	9.3526	9.19951
0.6179	49.9908	114.548	9.41055				9.41055	9.29849	8.96499	8.41799	7.67051	6.74036	5.64968	4.42446	3.09387	1.68959	0.245083	-1.20526	-2.62691	-3.98599	-5.25015	-6.38927	-7.37624	-8.18753	-8.80384	-9.21049	-9.39779	-9.36127	-9.10182	-8.62561	-7.94397	-7.07315	-6.03389	-4.85092	-3.55243	-2.16934	-0.734583	0.717667	2.15282	3.53671	4.83637	6.02086	7.06195	7.93486	8.61881	9.09749	9.35952	9.39865	9.21395
0.61992	50.0647	113.388	9.35211				9.35211	9.24002	8.90644	8.35937	7.61191	6.682	5.59191	4.36778	3.03895	1.63727	0.196346	-1.24928	-2.66497	-4.01677	-5.27229	-6.40142	-7.37711	-8.17597	-8.77884	-9.17127	-9.34386	-9.29248	-9.01834	-8.52803	-7.8333	-6.95079	-5.90167	-4.71108	-3.40757	-2.02237	-0.58869	0.859097	2.28629	3.65868	4.94337	6.10956	7.1293	7.97815	8.63576	9.08635	9.31915	9.32855	9.11434
0.62195	50.0611	112.202	9.29822				9.29822	9.18605	8.85224	8.30485	7.55707	6.62697	5.53697	4.31337	2.98571	1.586	0.148034	-1.29351	-2.70384	-4.04894	-5.29634	-6.41596	-7.38077	-8.1675	-8.75717	-9.13555	-9.29351	-9.22724	-8.93833	-8.43377	-7.72572	-6.83126	-5.77198	-4.57344	-3.26455	-1.87689	-0.443951	0.999701	2.41923	3.78039	5.05034	6.19844	7.19698	8.02188	8.65322	9.07579	9.27937	9.25907	9.01537
0.62397	50.2667	111.302	9.25204				9.25204	9.1397	8.80541	8.25729	7.50864	6.57765	5.48692	4.26295	2.93546	1.53668	0.10058	-1.33796	-2.74401	-4.08342	-5.32367	-6.43463	-7.38934	-8.1646	-8.74159	-9.10629	-9.24986	-9.16879	-8.86507	-8.34607	-7.62439	-6.71755	-5.64758	-4.44047	-3.12552	-1.73467	-0.301692	1.13861	2.55126	3.90196	5.1579	6.28858	7.26655	8.06806	8.67363	9.06858	9.2433	9.19355	8.92054
0.62599	50.428	110.232	9.18333				9.18333	9.0711	8.73716	8.18967	7.44202	6.51247	5.42374	4.20245	2.87845	1.48409	0.0534589	-1.37848	-2.77672	-4.1071	-5.3371	-6.43664	-7.37887	-8.14075	-8.70365	-9.05382	-9.18271	-9.08715	-8.76949	-8.23749	-7.50416	-6.58741	-5.50965	-4.29723	-2.97978	-1.5895	-0.160369	1.27268	2.67462	4.0112	5.24973	6.35995	7.31472	8.09072	8.66896	9.03532	9.18084	9.10197	8.80063
0.62801	50.162	109.711	9.26283				9.26283	9.1489	8.80992	8.25421	7.49547	6.55234	5.44802	4.20969	2.86781	1.45538	0.00714467	-1.44126	-2.85422	-4.19696	-5.43646	-6.54223	-7.48706	-8.24772	-8.80549	-9.14666	-9.26282	-9.15112	-8.81432	-8.26069	-7.50385	-6.56243	-5.45957	-4.22242	-2.88139	-1.46949	-0.021434	1.42715	2.84062	4.18422	5.42488	6.5321	7.47864	8.24121	8.80105	9.14439	9.26279	9.15333	8.8187
0.63004	50.0305	109.344	9.34605				9.34605	9.23035	8.88613	8.3219	7.55164	6.59442	5.47393	4.21791	2.85747	1.42628	-0.0402222	-1.50573	-2.93395	-4.28954	-5.53893	-6.65118	-7.59876	-8.35821	-8.91073	-9.24263	-9.3457	-9.21739	-8.86088	-8.28498	-7.50397	-6.53717	-5.40852	-4.14597	-2.78077	-1.34672	0.120664	1.58506	3.01022	4.36085	5.60352	6.70745	7.64531	8.3939	8.93466	9.25422	9.34466	9.20375	8.83497
0.63206	49.8217	108.58	9.3778				9.3778	9.26096	8.91338	8.3437	7.56612	6.60002	5.46947	4.20263	2.83108	1.38899	-0.0877156	-1.56223	-2.99782	-4.35872	-5.61101	-6.72349	-7.66844	-8.42232	-8.96634	-9.28695	-9.37616	-9.23174	-8.8573	-8.26216	-7.46116	-6.47424	-5.32601	-4.04507	-2.66335	-1.21525	0.263116	1.73493	3.16352	4.51328	5.75058	6.8446	7.76807	8.49799	9.01616	9.30968	9.37123	9.19928	8.79812
0.63408	49.6607	107.757	9.39133				9.39133	9.27358	8.92329	8.34923	7.56581	6.59267	5.45422	4.17899	2.79897	1.34876	-0.135265	-1.6159	-3.05602	-4.4195	-5.67216	-6.78258	-7.72293	-8.46961	-9.00391	-9.31243	-9.38743	-9.22703	-8.83525	-8.22192	-7.40242	-6.39729	-5.23175	-3.93501	-2.5396	-1.08051	0.405683	1.8817	3.31053	4.65634	5.8854	6.96687	7.87364	8.58297	9.07707	9.34356	9.37574	9.17282	8.73989
0.6361	49.5971	107.14	9.42094				9.42094	9.30207	8.94845	8.36902	7.57838	6.5965	5.44815	4.16232	2.77144	1.31063	-0.18326	-1.67252	-3.11958	-4.48791	-5.74299	-6.85314	-7.79034	-8.53095	-9.05628	-9.35306	-9.41381	-9.237	-8.82709	-8.19442	-7.35495	-6.32988	-5.14507	-3.83042	-2.41911	-0.946749	0.549504	2.03189	3.463	4.80672	6.02913	7.0994	7.99051	8.67997	9.15039	9.38989	9.39244	9.15795	8.69236
0.63813	49.5853	106.237	9.39406				9.39406	9.27477	8.91993	8.33856	7.54541	6.56064	5.40924	4.12047	2.72706	1.26438	-0.230401	-1.71933	-3.1646	-4.5295	-5.77936	-6.88245	-7.81075	-8.54067	-9.0537	-9.33679	-9.38275	-9.19043	-8.7647	-8.11637	-7.26192	-6.22303	-5.02611	-3.70153	-2.28295	-0.806392	0.690647	2.17015	3.59453	4.92763	6.13558	7.18771	8.05729	8.72224	9.16568	9.37634	9.34888	9.08398	8.58838
0.64015	49.7678	105.022	9.27887				9.27887	9.16029	8.80761	8.22982	7.44171	6.4634	5.3199	4.04045	2.65773	1.20708	-0.274417	-1.7489	-3.17868	-4.52723	-5.76007	-6.8457	-7.75637	-8.46881	-8.96481	-9.23169	-9.26263	-9.05685	-8.61959	-7.96204	-7.10101	-6.05849	-4.86112	-3.53953	-2.12747	-0.661036	0.822289	2.2846	3.68852	4.99817	6.18009	7.20405	8.0439	8.67817	9.09065	9.27079	9.214	8.92172	8.40142
0.64217	49.7492	103.881	9.20563				9.20563	9.08725	8.73517	8.15842	7.37185	6.39569	5.25504	3.97924	2.6011	1.15606	-0.318715	-1.78529	-3.20595	-4.54416	-5.76549	-6.83855	-7.73573	-8.43396	-8.91527	-9.1673	-9.18356	-8.96364	-8.51317	-7.84377	-6.97263	-5.92216	-4.71939	-3.39524	-1.98377	-0.52128	0.954617	2.40596	3.79543	5.08729	6.2483	7.24862	8.06252	8.66905	9.05264	9.2034	9.11746	8.79704	8.25037
0.64419	49.105	103.683	9.39874				9.39874	9.27712	8.9154	8.32295	7.5151	6.51276	5.34187	4.03272	2.61921	1.13792	-0.372832	-1.87393	-3.32653	-4.69304	-5.93809	-7.02946	-7.93891	-8.64289	-9.1232	-9.36739	-9.36916	-9.12844	-8.65148	-7.95062	-7.044	-5.95507	-4.71202	-3.34703	-1.89541	-0.394739	1.11615	2.59815	4.01291	5.32381	6.49693	7.50191	8.31274	8.90844	9.27357	9.39871	9.28061	8.92232	8.33311
0.64622	49.0804	102.783	9.36528				9.36528	9.24333	8.88065	8.28669	7.47692	6.47242	5.29937	3.98829	2.57335	1.09139	-0.418991	-1.91846	-3.36797	-4.72976	-5.96838	-7.05156	-7.9511	-8.64356	-9.11091	-9.34099	-9.32779	-9.07167	-8.5793	-7.86349	-6.94289	-5.84147	-4.58792	-3.21489	-1.75813	-0.255584	1.25362	2.73017	4.13562	5.43337	6.58961	7.57424	8.36161	8.93122	9.26822	9.36386	9.21562	8.82738	8.20925
0.64824	49.1192	102.461	9.41919				9.41919	9.29577	8.92875	8.32774	7.50849	6.49247	5.30631	3.9811	2.55155	1.05514	-0.468916	-1.98069	-3.44056	-4.81026	-6.0539	-7.1389	-8.03682	-8.72412	-9.1828	-9.40083	-9.3725	-9.09856	-8.58618	-7.8488	-6.90572	-5.78168	-4.50612	-3.11247	-1.63726	-0.11914	1.4021	2.8866	4.29545	5.59173	6.74148	7.71456	8.48547	9.03402	9.34581	9.41269	9.2329	8.81116	8.1585
0.65026	48.6237	101.606	9.47282				9.47282	9.34793	8.97653	8.36844	7.53967	6.51209	5.31279	3.97339	2.52922	1.01836	-0.519359	-2.04338	-3.51352	-4.89101	-6.13953	-7.22615	-8.12223	-8.80413	-9.25387	-9.45959	-9.41587	-9.12387	-8.59127	-7.83213	-6.86646	-5.71972	-4.42217	-3.008	-1.51451	0.0189079	1.55183	3.04383	4.45557	5.74982	6.89245	7.85333	8.60713	9.13396	9.41994	9.45752	9.24571	8.7901	8.1027
0.65228	48.5975	100.453	9.38711				9.38711	9.26258	8.89228	8.28604	7.45996	6.43593	5.24114	3.90729	2.46977	0.966717	-0.561986	-2.07578	-3.53449	-4.89943	-6.13437	-7.20654	-8.08751	-8.75389	-9.188	-9.37833	-9.31982	-9.01403	-8.46908	-7.69941	-6.72545	-5.57305	-4.27278	-2.85914	-1.36964	0.156204	1.6779	3.15508	4.54854	5.82132	6.93964	7.87384	8.59911	9.09623	9.35199	9.35963	9.11892	8.63626	7.92445
0.65431	48.9073	99.9523	9.35593				9.35593	9.23104	8.85969	8.25182	7.42363	6.39725	5.20007	3.86407	2.4249	0.92099	-0.607508	-2.11979	-3.57547	-4.9357	-6.16415	-7.22803	-8.09894	-8.75363	-9.17461	-9.35064	-9.27703	-8.95575	-8.39536	-7.61084	-6.62312	-5.45857	-4.1483	-2.72727	-1.23343	0.29334	1.81228	3.28283	4.66574	5.92409	7.02427	7.93692	8.63767	9.10781	9.33479	9.31255	9.04168	8.52942	7.78944
0.65633	48.8706	99.6549	9.42364				9.42364	9.29707	8.92075	8.3048	7.46576	6.42617	5.21395	3.86167	2.40566	0.885023	-0.659386	-2.18608	-3.65405	-5.02387	-6.25873	-7.32546	-8.19541	-8.84521	-9.25741	-9.42092	-9.33137	-8.99114	-8.40939	-7.60174	-6.58989	-5.40102	-4.06706	-2.62385	-1.11015	0.433368	1.96524	3.44433	4.83089	6.08768	7.18094	8.0813	8.76457	9.2124	9.41276	9.36028	9.05634	8.50913	7.73334
0.65835	48.5129	99.067	9.49694				9.49694	9.3686	8.98705	8.36259	7.51211	6.45859	5.23051	3.86106	2.38725	0.848926	-0.712348	-2.25437	-3.73546	-5.11559	-6.35745	-7.42749	-8.29677	-8.94181	-9.34517	-9.49595	-9.39008	-9.03041	-8.42667	-7.59517	-6.55839	-5.34435	-3.98586	-2.51964	-0.985326	0.575622	2.12101	3.60908	4.9996	6.25499	7.34132	8.22922	8.89471	9.3198	9.49299	9.4096	9.07189	8.48899	7.67665
0.66037	48.4631	98.6694	9.54788				9.54788	9.41806	9.03212	8.40058	7.54058	6.47553	5.23439	3.85091	2.3627	0.810249	-0.76424	-2.31795	-3.80862	-5.19572	-6.44153	-7.51218	-8.37854	-9.01705	-9.41036	-9.54777	-9.42553	-9.04699	-8.42242	-7.56881	-6.50938	-5.27294	-3.89311	-2.40741	-0.856238	0.718214	2.27314	3.76624	5.15693	6.40738	7.48359	8.3563	9.00177	9.40244	9.54743	9.43279	9.06164	8.44406	7.59687
0.6624	48.9654	98.4262	9.5223				9.5223	9.39203	9.00479	8.37117	7.50851	6.44041	5.1961	3.80961	2.3189	0.764734	-0.810354	-2.36327	-3.85152	-5.2344	-6.47405	-7.53658	-8.39289	-9.01957	-9.39947	-9.52219	-9.38438	-8.9898	-8.34926	-7.48027	-6.40662	-5.15768	-3.76762	-2.27447	-0.719096	0.855955	2.40759	3.89334	5.27258	6.50755	7.56447	8.41442	9.03415	9.40669	9.52186	9.37651	8.9746	8.32715	7.45186
0.66442	49.1415	98.1666	9.55409				9.55409	9.42259	9.03171	8.39221	7.52169	6.44412	5.18916	3.79135	2.28918	0.723995	-0.861121	-2.42253	-3.91726	-5.30415	-6.54504	-7.60575	-8.4571	-9.07564	-9.44436	-9.5531	-9.39886	-8.9859	-8.32557	-7.43607	-6.34187	-5.07309	-3.66466	-2.15536	-0.586719	0.998068	2.55538	4.04235	5.41805	6.6446	7.68824	8.52024	9.1177	9.46417	9.55012	9.37318	8.93822	8.25721	7.3489
0.66644	48.9052	96.8271	9.4532				9.4532	9.3223	8.93321	8.29673	7.43047	6.35843	5.11029	3.72062	2.22791	0.673502	-0.899561	-2.44771	-3.92807	-5.29965	-6.52445	-7.56856	-8.40306	-9.00484	-9.35723	-9.45048	-9.28199	-8.85645	-8.18563	-7.28811	-6.18875	-4.91799	-3.51103	-2.00683	-0.447054	1.1251	2.6661	4.13326	5.48595	6.68671	7.70228	8.50454	9.07127	9.38677	9.44231	9.23635	8.77458	8.06981	7.14155
0.66847	48.3839	96.1481	9.5374				9.5374	9.40452	9.00961	8.36366	7.48467	6.39713	5.13135	3.72259	2.21011	0.636042	-0.955744	-2.5209	-4.01582	-5.39884	-6.63143	-7.67925	-8.5131	-9.10974	-9.45256	-9.532	-9.34585	-8.89928	-8.20476	-7.28162	-6.1556	-4.85805	-3.42515	-1.89681	-0.31562	1.27436	2.82884	4.3045	5.66022	6.85822	7.86514	8.6529	9.19957	9.4899	9.51582	9.27659	8.77889	8.03658	7.07034
0.67049	48.0705	95.7688	9.63989				9.63989	9.50478	9.10324	8.44652	7.55302	6.44781	5.16185	3.7312	2.19596	0.599156	-1.01444	-2.5996	-4.11189	-5.50891	-6.75151	-7.80486	-8.63942	-9.23181	-9.56542	-9.63089	-9.42639	-8.95765	-8.23782	-7.28707	-6.13205	-4.80514	-3.34354	-1.78821	-0.182752	1.42783	2.99838	4.48489	5.84568	7.0426	8.04211	8.81618	9.34313	9.60817	9.60388	9.33038	8.79533	8.01373	7.0075
0.67251	48.2719	95.2945	9.61838				9.61838	9.48276	9.07972	8.42063	7.52408	6.41534	5.12569	3.6915	2.1532	0.554181	-1.06047	-2.64521	-4.15535	-5.54832	-6.78482	-7.82998	-8.65434	-9.23464	-9.55452	-9.60496	-9.38454	-8.89947	-8.16343	-7.19718	-6.02797	-4.68877	-3.21734	-1.65519	-0.0463506	1.56379	3.12983	4.60761	5.95546	7.13535	8.11403	8.86389	9.36379	9.59962	9.56474	9.26013	8.69439	7.88345	6.85021
0.67453	48.4089	94.6585	9.57443				9.57443	9.43862	9.03503	8.37513	7.47763	6.36799	5.0777	3.64335	2.10564	0.5082	-1.10366	-2.68421	-4.18861	-5.57419	-6.80162	-7.8361	-8.64826	-9.21508	-9.52048	-9.55578	-9.31998	-8.81979	-8.06938	-7.09004	-5.90956	-4.56143	-3.0839	-1.51887	0.0892421	1.69482	3.25233	4.71756	6.04896	7.20875	8.16403	8.88771	9.35924	9.56525	9.4999	9.16505	8.57018	7.73218	6.67483
0.67656	48.3786	94.2788	9.61701				9.61701	9.47978	9.07199	8.40528	7.49869	6.37808	5.07544	3.62794	2.0769	0.466591	-1.15704	-2.74764	-4.25983	-5.65044	-6.87979	-7.91279	-8.71995	-9.27825	-9.57174	-9.59205	-9.3386	-8.81863	-8.04697	-7.04565	-5.84325	-4.47408	-2.97721	-1.39538	0.226277	1.84148	3.40412	4.86961	6.19612	7.34579	8.28581	8.98935	9.43634	9.61401	9.51729	9.14895	8.51949	7.64689	6.55604
0.67858	48.2491	94.1543	9.73343				9.73343	9.59371	9.17854	8.49986	7.57713	6.43687	5.1118	3.63997	2.06363	0.428049	-1.21983	-2.83268	-4.3642	-5.77043	-7.01098	-8.05025	-8.85839	-9.4122	-9.69578	-9.701	-9.42769	-8.88371	-8.08467	-7.05352	-5.81986	-4.4191	-2.89148	-1.28083	0.366582	2.00347	3.58284	5.05935	6.3906	7.53837	8.46971	9.15788	9.58313	9.73324	9.6039	9.19883	8.52966	7.6156	6.48289
0.6806	48.522	93.7038	9.69463				9.69463	9.55463	9.13868	8.4588	7.53462	6.39283	5.0664	3.59365	2.01711	0.382318	-1.26352	-2.87286	-4.39924	-5.79855	-7.0304	-8.0592	-8.85525	-9.39554	-9.66447	-9.65429	-9.36527	-8.80578	-7.99196	-6.94733	-5.70205	-4.29208	-2.75816	-1.14458	0.502064	2.1342	3.70471	5.16821	6.48245	7.60947	8.51672	9.17799	9.5742	9.69389	9.5336	9.09798	8.39959	7.45861	6.30222
0.68262	48.2614	93.0267	9.7198				9.7198	9.57861	9.15914	8.47357	7.54182	6.39096	5.05443	3.57105	1.98393	0.339165	-1.31545	-2.93185	-4.46307	-5.86463	-7.0958	-8.12083	-8.90992	-9.44016	-9.69613	-9.67042	-9.36375	-8.78504	-7.9511	-6.88616	-5.62117	-4.19286	-2.64274	-1.01584	0.640566	2.27837	3.84997	5.30973	6.61523	7.72853	8.61731	9.25572	9.62524	9.71512	9.52275	9.05372	8.32166	7.34783	6.16053
0.68465	47.7797	92.4293	9.8105				9.8105	9.66715	9.24127	8.54531	7.59961	6.43182	5.07605	3.57194	1.96343	0.297544	-1.37704	-3.01138	-4.55771	-5.97084	-7.20947	-8.2374	-9.0246	-9.54805	-9.79245	-9.75067	-9.42393	-8.82177	-7.96179	-6.86913	-5.57572	-4.11935	-2.5426	-0.891539	0.785578	2.43974	4.02259	5.48789	6.7928	7.89919	8.77472	9.39382	9.73837	9.79833	9.57192	9.06577	8.29468	7.28117	6.05487
0.68667	47.9725	92.1078	9.81247				9.81247	9.66824	9.23979	8.53971	7.58858	6.41438	5.0516	3.54032	1.92497	0.253024	-1.42636	-3.06381	-4.61119	-6.02302	-7.25778	-8.27919	-9.0572	-9.56896	-9.79942	-9.7418	-9.39779	-8.77752	-7.8992	-6.78867	-5.47858	-4.00742	-2.41846	-0.758399	0.923955	2.57915	4.15852	5.61564	6.90768	7.99665	8.85053	9.44424	9.76031	9.78945	9.5308	8.99198	8.18881	7.14492	5.89098
0.68869	47.933	91.8692	9.88366				9.88366	9.73753	9.30346	8.59428	7.63097	6.44201	5.06256	3.5334	1.89976	0.209951	-1.48607	-3.13815	-4.69743	-6.11781	-7.35728	-8.3792	-9.15334	-9.65682	-9.87474	-9.80067	-9.43678	-8.79385	-7.89088	-6.75458	-5.41854	-3.92228	-2.31003	-0.629474	1.0697	2.73723	4.32383	5.78257	7.07032	8.149	8.98671	9.55868	9.848	9.84611	9.55307	8.97755	8.13655	7.05496	5.76475
0.69071	48.0446	91.2691	9.83813				9.83813	9.69182	9.25724	8.54732	7.58317	6.39347	5.01361	3.48462	1.85199	0.164278	-1.52832	-3.17547	-4.72816	-6.14022	-7.36965	-8.37988	-9.14087	-9.62997	-9.83264	-9.74286	-9.36329	-8.70522	-7.78823	-6.63959	-5.29346	-3.78989	-2.1736	-0.49265	1.20295	2.86277	4.43744	5.88013	7.14792	8.2031	9.0143	9.55738	9.81619	9.78303	9.45889	8.85341	7.9846	6.8783	5.56742
0.69274	47.941	90.5209	9.80586				9.80586	9.65917	9.2235	8.51188	7.5456	6.35357	4.97145	3.44059	1.8068	0.118955	-1.57245	-3.21681	-4.76493	-6.17049	-7.39145	-8.39126	-9.14002	-9.61533	-9.80297	-9.69732	-9.30155	-8.62749	-7.69531	-6.5329	-5.17504	-3.66235	-2.04009	-0.356795	1.33717	2.99114	4.55561	5.98379	7.23295	8.2657	9.05117	9.56584	9.79432	9.72976	9.37412	8.73801	7.84049	6.70838	5.37558
0.69476	47.7879	89.9903	9.83278				9.83278	9.68483	9.24545	8.52784	7.55361	6.35208	4.95939	3.41747	1.7727	0.074594	-1.62576	-3.27719	-4.83	-6.23747	-7.45724	-8.4526	-9.19359	-9.65794	-9.83165	-9.7095	-9.29517	-8.60112	-7.64825	-6.46522	-5.08764	-3.55696	-1.91924	-0.223765	1.47844	3.13616	4.6995	6.12143	7.35914	8.3754	9.13963	9.62882	9.82825	9.73193	9.34275	8.67243	7.74113	6.57688	5.21472
0.69678	48.004	90.054	9.91171				9.91171	9.76171	9.31625	8.58881	7.60141	6.38394	4.97325	3.41203	1.74753	0.0301447	-1.68815	-3.35536	-4.92101	-6.33771	-7.56258	-8.55856	-9.29549	-9.75108	-9.91152	-9.77198	-9.33666	-8.61874	-7.63996	-6.42994	-5.02531	-3.46857	-1.80684	-0.090433	1.62872	3.29857	4.86858	6.29124	7.52347	8.52799	9.2744	9.74009	9.91097	9.78188	9.35672	8.64836	7.67823	6.47571	5.07718
0.6988	48.0767	90.2542	10.0576				10.0576	9.90447	9.44986	8.70758	7.70021	6.45843	5.02004	3.42883	1.73324	-0.0151233	-1.76302	-3.45725	-5.04623	-6.48159	-7.71963	-8.72267	-9.46017	-9.90968	-10.0575	-9.89916	-9.43946	-8.6924	-7.68072	-6.43522	-4.99381	-3.40038	-1.70343	0.0453697	1.79279	3.48564	5.07237	6.50469	7.73899	8.73769	9.4704	9.9148	10.0574	9.89377	9.42898	8.67715	7.66116	6.41194	4.96753
0.70083	48.1327	90.0666	10.1162				10.1162	9.96129	9.50141	8.75061	7.73186	6.47637	5.02258	3.41501	1.70287	-0.0614166	-1.82382	-3.53038	-5.12884	-6.57026	-7.8105	-8.81159	-9.54288	-9.98197	-10.1154	-9.93915	-9.45855	-8.68833	-7.65208	-6.38154	-4.91559	-3.29914	-1.58166	0.184241	1.9445	3.64522	5.23433	6.66317	7.88799	8.87128	9.58294	10.0012	10.1132	9.91554	9.41429	8.62477	7.57118	6.28576	4.80787
0.70285	47.9609	89.3345	10.0966				10.0966	9.9411	9.47949	8.72596	7.70371	6.44422	4.98627	3.37477	1.65934	-0.107185	-1.87041	-3.57604	-5.17154	-6.60778	-7.84053	-8.83183	-9.55114	-9.97633	-10.0943	-9.90138	-9.40356	-8.61616	-7.56341	-6.27775	-4.79875	-3.17198	-1.44753	0.321506	2.08064	3.77569	5.35448	6.76837	7.97382	8.93371	9.61849	10.0071	10.0875	9.85721	9.3234	8.50247	7.41971	6.10845	4.60907
0.70487	47.8138	88.4106	10.0214				10.0214	9.86621	9.40543	8.65335	7.63326	6.37674	4.92272	3.31624	1.60704	-0.15193	-1.9062	-3.60142	-5.1851	-6.60819	-7.82661	-8.80262	-9.50599	-9.91493	-10.0168	-9.80841	-9.29623	-8.49613	-7.43289	-6.13943	-4.65582	-3.02801	-1.30641	0.455651	2.2036	3.8833	5.44272	6.83357	8.01276	8.94379	9.5978	9.95454	10.003	9.74159	9.17849	8.3311	7.22569	5.89647	4.38463
0.70689	47.4753	87.9161	10.0978				10.0978	9.94054	9.47363	8.71161	7.67823	6.40568	4.93359	3.30782	1.57901	-0.198976	-1.97077	-3.68117	-5.27691	-6.70827	-7.93068	-8.90604	-9.60399	-10.0028	-10.09	-9.86288	-9.32855	-8.50365	-7.41386	-6.09313	-4.5826	-2.92933	-1.18481	0.59662	2.35946	4.04881	5.61204	7.00045	8.17081	9.08664	9.71943	10.0495	10.0665	9.76989	9.16899	8.28248	7.13797	5.77112	4.2245
0.70892	47.3379	87.8972	10.2442				10.2442	10.0838	9.60739	8.83003	7.77604	6.47844	4.97788	3.32138	1.56082	-0.248641	-2.05031	-3.78774	-5.40652	-6.85591	-8.09052	-9.07167	-9.76862	-10.1595	-10.2322	-9.98424	-9.42352	-8.56758	-7.44324	-6.08571	-4.53752	-2.84718	-1.06765	0.745336	2.53497	4.24519	5.82241	7.21723	8.38594	9.29193	9.90683	10.2114	10.196	9.86118	9.21745	8.28495	7.0929	5.67863	4.08647
0.71094	47.2325	87.4887	10.2841				10.2841	10.122	9.64113	8.85645	7.79273	6.48349	4.96998	3.29988	1.52581	-0.296332	-2.10914	-3.85549	-5.48037	-6.93258	-8.16637	-9.14286	-9.8313	-10.21	-10.267	-10.0005	-9.41894	-8.54062	-7.39321	-6.01287	-4.44308	-2.73331	-0.937415	0.888011	2.68546	4.3983	5.97256	7.35865	8.51289	9.39892	9.98881	10.264	10.2158	9.84574	9.16547	8.19642	6.96914	5.52228	3.90143
0.71296	47.1141	87.4431	10.4202				10.4202	10.2552	9.76513	8.9657	7.88218	6.54891	5.00813	3.30867	1.50437	-0.347593	-2.18854	-3.96015	-5.60628	-7.07476	-8.31909	-9.29981	-9.98587	-10.3555	-10.3971	-10.1092	-9.50093	-8.59167	-7.41018	-5.9939	-4.38769	-2.64246	-0.813503	1.04123	2.86298	4.594	6.17947	7.56913	8.71897	9.59254	10.1622	10.4098	10.3276	9.91815	9.19444	8.17941	6.90521	5.41221	3.74773
0.71498	46.909	87.1802	10.5237				10.5237	10.3561	9.85841	9.04661	7.94654	6.59326	5.02989	3.30623	1.47723	-0.398846	-2.26221	-4.05349	-5.71561	-7.1956	-8.44631	-9.42787	-10.109	-10.468	-10.4935	-10.1846	-9.55116	-8.61337	-7.40112	-5.95304	-4.31526	-2.53998	-0.683761	1.19424	3.0342	4.77746	6.3685	7.7566	8.89754	9.75497	10.3015	10.5199	10.403	9.95461	9.18903	8.13065	6.81318	5.27861	3.57584
0.71701	47.0753	87.2486	10.6179				10.6179	10.4478	9.94284	9.11929	8.0035	6.63123	5.04647	3.29999	1.44775	-0.450872	-2.33505	-4.1444	-5.82094	-7.31095	-8.56667	-9.54787	-10.2231	-10.5707	-10.5796	-10.2495	-9.59087	-8.62493	-7.3826	-5.90369	-4.2356	-2.43177	-0.550016	1.34937	3.2055	4.95892	6.55343	7.93793	9.06805	9.90758	10.4296	10.6174	10.465	9.97723	9.16973	8.06837	6.70846	5.13357	3.39418
0.71903	47.0782	86.481	10.5321				10.5321	10.3624	9.85876	9.03741	7.92482	6.55686	4.97759	3.23791	1.39389	-0.495049	-2.36804	-4.16471	-5.82717	-7.30185	-8.54122	-9.50534	-10.1631	-10.4934	-10.4856	-10.1398	-9.46724	-8.48961	-7.23839	-5.75392	-4.08401	-2.2825	-0.407427	1.48077	3.32125	5.0547	6.62526	7.98232	9.08213	9.88927	10.3777	10.5317	10.3464	9.82756	8.99206	7.86678	6.488	4.90013	3.15434
0.72105	47.1648	85.6705	10.4085				10.4085	10.2398	9.73933	8.92322	7.81794	6.4593	4.89134	3.16487	1.33584	-0.536487	-2.39143	-4.16887	-5.81121	-7.26523	-8.48381	-9.42745	-10.0656	-10.3775	-10.3532	-9.9933	-9.30958	-8.32416	-7.06899	-5.58474	-3.9195	-2.12724	-0.266053	1.60376	3.4216	5.12856	6.66932	7.99395	9.05952	9.8315	10.2849	10.405	10.1878	9.64057	8.78089	7.63664	6.24492	4.65082	2.906
0.72308	47.3838	85.0655	10.3009				10.3009	10.1331	9.63502	8.82295	7.72335	6.37205	4.8131	3.09729	1.28055	-0.577926	-2.41757	-4.17842	-5.80311	-7.23868	-8.43835	-9.36302	-9.98256	-10.2768	-10.2361	-9.86182	-9.16616	-8.17179	-6.91111	-5.4252	-3.76249	-1.97717	-0.127409	1.7265	3.52415	5.20694	6.72005	8.01416	9.0471	9.7852	10.2044	10.2911	10.0424	9.46638	8.5819	7.41774	6.01185	4.41004	2.66451
0.7251	47.3917	85.5256	10.5415				10.5415	10.3688	9.85627	9.02075	7.88962	6.49994	4.89725	3.13407	1.26819	-0.639253	-2.52575	-4.32947	-5.99131	-7.45681	-8.67795	-9.61471	-10.2364	-10.5226	-10.464	-10.0625	-9.33118	-8.29411	-6.98524	-5.44745	-3.73115	-1.89257	0.0080223	1.90836	3.74615	5.46118	6.99724	8.304	9.33863	10.0672	10.4659	10.5216	10.2325	9.60812	8.66883	7.44546	5.9781	4.31483	2.51017
0.72712	46.8979	85.1638	10.6964				10.6964	10.5201	9.99723	9.14488	7.99118	6.57414	4.94047	3.14399	1.24391	-0.697163	-2.61526	-4.44718	-6.13255	-7.61583	-8.84815	-9.78889	-10.4071	-10.6823	-10.6055	-10.1792	-9.41752	-8.34547	-6.99842	-5.42074	-3.66444	-1.78738	0.148579	2.07964	3.94217	5.6748	7.22042	8.52811	9.55477	10.2666	10.6401	10.6629	10.3344	9.66535	8.67778	7.40425	5.88674	4.17523	2.32614
0.72914	46.7057	85.3272	10.9162				10.9162	10.7354	10.1988	9.32425	8.14075	6.6875	5.01265	3.17171	1.22566	-0.760993	-2.72243	-4.59366	-6.31268	-7.82252	-9.07315	-10.0231	-10.641	-10.9063	-10.8101	-10.3558	-9.55831	-8.44411	-7.0501	-5.42248	-3.61519	-1.6881	0.294932	2.26819	4.16628	5.92632	7.48999	8.80547	9.82917	10.5272	10.8764	10.8651	10.4939	9.77491	8.73204	7.39982	5.82241	4.05206	2.14744
0.73117	46.9176	85.1099	10.9157				10.9157	10.7338	10.1943	9.31511	8.12555	6.66524	4.98284	3.13442	1.18155	-0.810681	-2.7759	-4.64863	-6.36646	-7.87217	-9.11557	-10.0552	-10.6599	-10.9093	-10.7952	-10.3215	-9.50381	-8.36946	-6.95625	-5.31125	-3.48928	-1.55105	0.438866	2.41416	4.30901	6.06028	7.60963	8.90542	9.90448	10.5735	10.8903	10.8441	10.4367	9.68144	8.60364	7.23916	5.63348	3.84008	1.91874
0.73319	46.9291	84.2073	10.7726				10.7726	10.5922	10.0568	9.18454	8.00453	6.55634	4.88849	3.05685	1.1228	-0.848877	-2.79211	-4.64179	-6.33596	-7.81785	-9.0378	-9.95496	-10.5386	-10.7691	-10.6389	-10.1521	-9.32529	-8.186	-6.77245	-5.132	-3.3196	-1.39598	0.574405	2.52555	4.39207	6.11145	7.62606	8.88518	9.8466	10.4781	10.7586	10.6786	10.2408	9.45995	8.36213	6.98414	5.37216	3.58018	1.66826
0.73521	46.5782	83.7125	10.8498				10.8498	10.667	10.1249	9.2417	8.04716	6.58153	4.89417	3.04194	1.08723	-0.904105	-2.86498	-4.72935	-6.43439	-7.92266	-9.14403	-10.0574	-10.6319	-10.8482	-10.6991	-10.1895	-9.33672	-8.16936	-6.72678	-5.0576	-3.21803	-1.27005	0.720718	2.6872	4.56316	6.28539	7.79588	9.04374	9.98693	10.5937	10.8435	10.7281	10.2512	9.42905	8.2892	6.8701	5.21956	3.39319	1.4525
0.73723	46.3134	82.9806	10.8315				10.8315	10.6481	10.104	9.21756	8.01895	6.5487	4.85664	3.00006	1.04186	-0.951634	-2.91289	-4.77548	-6.4763	-7.95776	-9.16966	-10.0709	-10.6311	-10.8312	-10.6643	-10.1362	-9.26483	-8.07958	-6.62065	-4.93745	-3.08701	-1.13201	0.861345	2.82552	4.69399	6.40345	7.89601	9.12111	10.0372	10.6134	10.83	10.6798	10.1678	9.31144	8.13964	6.69212	5.01793	3.17375	1.22208
0.73926	46.1659	82.6664	10.9015				10.9015	10.7159	10.1653	9.26841	8.05588	6.56897	4.85833	2.98222	1.00453	-1.00737	-2.98497	-4.86089	-6.57126	-8.05781	-9.26992	-10.1663	-10.7164	-10.9015	-10.7154	-10.1642	-9.26691	-8.05396	-6.56669	-4.85577	-2.97946	-1.00168	1.01022	2.98772	4.86345	6.57354	8.05974	9.27142	10.1673	10.7169	10.9015	10.7148	10.1632	9.2654	8.05203	6.56441	4.85321	2.97671	0.998831
0.74128	46.8495	82.5599	10.7826				10.7826	10.598	10.0504	9.15868	7.9533	6.47556	4.77606	2.913	0.950183	-1.04517	-3.00473	-4.8614	-6.55158	-8.0174	-9.20867	-10.0846	-10.6151	-10.7822	-10.58	-10.0155	-9.10798	-7.88857	-6.39903	-4.69034	-2.82104	-0.855121	1.14008	3.09623	4.94636	6.62709	8.08088	9.25793	10.1179	10.6315	10.7809	10.5612	9.97974	9.05656	7.82323	6.322	4.60426	2.72885	0.759992
0.7433	46.9027	82.327	10.8133				10.8133	10.6271	10.0751	9.17609	7.96117	6.47214	4.76025	2.88447	0.909364	-1.09705	-3.06569	-4.92877	-6.62215	-8.08752	-9.27442	-10.142	-10.6603	-10.8116	-10.5907	-10.0051	-9.07498	-7.83241	-6.32015	-4.59029	-2.70237	-0.721402	1.2844	3.24598	5.0958	6.77016	8.21141	9.36993	10.2058	10.6903	10.8067	10.551	9.93206	8.9711	7.70126	6.16625	4.41892	2.51945	0.533221
0.74532	46.6179	81.7504	10.8413				10.8413	10.6536	10.0972	9.19115	7.96695	6.46694	4.74306	2.85498	0.868068	-1.1489	-3.12609	-4.99506	-6.69111	-8.15553	-9.33761	-10.1964	-10.7023	-10.8376	-10.5978	-9.99107	-9.03847	-7.77298	-6.2384	-4.48785	-2.58194	-0.58665	1.42895	3.39508	5.24368	6.91076	8.33859	9.47775	10.2888	10.7437	10.8266	10.5348	9.8782	8.87967	7.57375	6.00563	4.2296	2.30715	0.304835
0.74735	46.6202	81.049	10.7403				10.7403	10.5534	9.99915	9.09687	7.87795	6.38482	4.66946	2.79157	0.81651	-1.18697	-3.14913	-5.00168	-6.68014	-8.12608	-9.28918	-10.129	-10.6162	-10.7339	-10.478	-9.85735	-8.89363	-7.62036	-6.08184	-4.33163	-2.43066	-0.445075	1.556	3.50291	5.3279	6.96744	8.36446	9.47035	10.2466	10.6662	10.7145	10.39	9.70372	8.67973	7.35362	5.77156	3.98861	2.06683	0.0731049
0.74937	46.4727	80.7494	10.809				10.809	10.6198	10.0591	9.14629	7.91344	6.40366	4.66979	2.77249	0.77818	-1.24337	-3.2214	-5.0867	-6.774	-8.22424	-9.38668	-10.2206	-10.6969	-10.7989	-10.5229	-9.87871	-8.88881	-7.58785	-6.02135	-4.24414	-2.31841	-0.311541	1.70623	3.66429	5.49412	7.13168	8.51967	9.60952	10.3631	10.754	10.7686	10.4063	9.6799	8.61473	7.24809	5.6278	3.81057	1.85999	-0.15568
0.75139	46.7079	80.1626	10.664				10.664	10.4764	9.92021	9.015	7.79262	6.29606	4.57799	2.69886	0.724767	-1.27482	-3.22956	-5.07067	-6.73338	-8.15919	-9.29794	-10.1095	-10.5655	-10.6497	-10.3592	-9.70425	-8.70787	-7.40512	-5.84184	-4.07303	-2.16091	-0.172765	1.82146	3.7516	5.54974	7.15263	8.50387	9.55591	10.2718	10.6262	10.6068	10.2142	9.46223	8.37736	6.99775	5.37194	3.55713	1.61716	-0.3797
0.75341	46.8196	79.7343	10.6051				10.6051	10.4176	9.86151	8.95664	7.73495	6.23967	4.52368	2.64767	0.678014	-1.31563	-3.26273	-5.09442	-6.74592	-8.1588	-9.28309	-10.079	-10.5184	-10.5858	-10.2787	-9.60804	-8.59752	-7.2829	-5.71066	-3.93643	-2.02296	-0.0379289	1.94844	3.86589	5.64659	7.22757	8.55289	9.57568	10.2598	10.5809	10.5278	10.1024	9.31953	8.20705	6.80428	5.16083	3.33482	1.39086	-0.602294
0.75544	46.3514	79.5957	10.8272				10.8272	10.6347	10.064	9.13538	7.8819	6.34811	4.58858	2.66586	0.64834	-1.39224	-3.3833	-5.25405	-6.93795	-8.37513	-9.51446	-10.3154	-10.7496	-10.8014	-10.4692	-9.76461	-8.71279	-7.35113	-5.72804	-3.90125	-1.93572	0.0986457	2.1295	4.08463	5.8945	7.49475	8.82847	9.84823	10.5178	10.8133	10.7242	10.2538	9.41873	8.24871	6.78534	5.08068	3.19534	1.19636	-0.845161
0.75746	46.2804	79.4997	10.9352				10.9352	10.7398	10.1603	9.21762	7.94537	6.38906	4.60432	2.65497	0.610703	-1.4554	-3.46947	-5.3595	-7.05791	-8.504	-9.64604	-10.4432	-10.867	-10.9023	-10.5478	-9.81624	-8.7337	-7.33891	-5.68173	-3.82142	-1.82449	0.23767	2.29133	4.26308	6.08241	7.68428	9.01142	10.0164	10.6632	10.9289	10.8038	10.2924	9.41307	8.1972	6.68826	4.9402	3.01552	0.983025	-1.08461
0.75948	46.54	79.1754	10.8581				10.8581	10.663	10.0846	9.14376	7.87426	6.32174	4.54199	2.599	0.562594	-1.49403	-3.49696	-5.3742	-7.05828	-8.48866	-9.61395	-10.3937	-10.7998	-10.8178	-10.447	-9.70067	-8.60568	-7.20138	-5.53825	-3.67606	-1.68174	0.373023	2.41438	4.36896	6.1665	7.74241	9.04004	10.0127	10.6256	10.8565	10.6972	10.1534	9.24469	8.0037	6.47504	4.71364	2.78283	0.751993	-1.30587
0.7615	46.3206	78.9683	10.9782				10.9782	10.7799	10.192	9.23592	7.94607	6.3691	4.562	2.59005	0.52452	-1.55996	-3.58808	-5.48655	-7.18677	-8.62731	-9.75612	-10.5324	-10.9281	-10.929	-10.5349	-9.76019	-8.63281	-7.19349	-5.49425	-3.59649	-1.56877	0.515634	2.58141	4.5539	6.36185	7.93993	9.23111	10.1887	10.7782	10.9782	10.7816	10.1953	9.24072	7.9522	6.37634	4.57009	2.5987	0.533405	-1.55116
0.76353	46.1155	78.5774	11.0326				11.0326	10.8322	10.2383	9.27256	7.96994	6.37782	4.55401	2.56477	0.482372	-1.61755	-3.65872	-5.56698	-7.27301	-8.71485	-9.84012	-10.6079	-10.9904	-10.9737	-10.5583	-9.75936	-8.60593	-7.13988	-5.41448	-3.49238	-1.44343	0.657963	2.73545	4.71357	6.52047	8.09051	9.36665	10.3025	10.8642	11.0312	10.7975	10.1715	9.17611	7.84736	6.23354	4.39329	2.39344	0.306657	-1.79127
0.76555	46.1547	78.7567	11.198				11.198	10.9935	10.3876	9.40234	8.07375	6.45032	4.59134	2.5647	0.444401	-1.69213	-3.76686	-5.70404	-7.43292	-8.89037	-10.0232	-10.7899	-11.1627	-11.1278	-10.6866	-9.85508	-8.66371	-7.15596	-5.3869	-3.42112	-1.3304	0.808891	2.91865	4.92182	6.74526	8.32239	9.5956	10.5184	11.0571	11.192	10.9182	10.2457	9.19909	7.81653	6.14852	4.25598	2.20803	0.0794392	-2.05205
0.76757	45.9974	78.3831	11.2415				11.2415	11.0352	10.4237	9.42964	8.08939	6.45218	4.57811	2.53597	0.400746	-1.74919	-3.83492	-5.77987	-7.51264	-8.96962	-10.0973	-10.8544	-11.2129	-11.1599	-10.6972	-9.84173	-8.62502	-7.09169	-5.29802	-3.30986	-1.2002	0.953521	3.07224	5.07818	6.89769	8.464	9.71959	10.6184	11.1274	11.2279	10.9162	10.2038	9.11681	7.69515	5.991	4.06693	1.99355	-0.153002	-2.29394
0.76959	46.0186	77.2721	10.9632				10.9632	10.7609	10.1615	9.18711	7.87371	6.26974	4.43439	2.43541	0.346557	-1.75509	-3.79196	-5.68891	-7.37591	-8.79073	-9.88114	-10.6069	-10.9413	-10.8718	-10.4012	-9.54678	-8.34003	-6.8255	-5.0591	-3.106	-1.03829	1.06775	3.13438	5.08534	6.84864	8.35921	9.56129	10.4105	10.8756	10.9394	10.5994	9.86829	8.77301	7.35399	5.66359	3.76418	1.72587	-0.376137	-2.46426
0.77162	45.752	76.7652	10.9941				10.9941	10.7902	10.186	9.20391	7.88039	6.26453	4.41628	2.40419	0.302919	-1.80959	-3.85497	-5.75734	-7.44614	-8.8587	-9.94263	-10.6577	-10.9774	-10.8899	-10.3984	-9.52117	-8.29071	-6.7527	-4.96417	-2.99149	-0.907838	1.2095	3.28196	5.23267	6.98927	8.48659	9.66907	10.4929	10.9274	10.9566	10.5793	9.80952	8.67586	7.22036	5.49699	3.56971	1.51	-0.605726	-2.69898
0.77364	45.5587	76.5933	11.1173				11.1173	10.9101	10.2959	9.29784	7.95304	6.31165	4.43491	2.39277	0.261415	-1.87969	-3.95071	-5.87439	-7.57902	-9.00101	-10.0874	-10.7975	-11.105	-10.9985	-10.4817	-9.5741	-8.30946	-6.73496	-4.9093	-2.90056	-0.783667	1.36245	3.45777	5.42414	7.18824	8.68428	9.85648	10.6611	11.0682	11.0625	10.6443	9.82919	8.64751	7.14336	5.37283	3.40194	1.30419	-0.842202	-2.95718
0.77566	45.4136	76.6184	11.2955				11.2955	11.0838	10.4566	9.43748	8.06455	6.38932	4.47458	2.39212	0.219982	-1.9604	-4.0673	-6.02173	-7.75043	-9.18861	-10.2824	-10.9907	-11.287	-11.1602	-10.6151	-9.67203	-8.36643	-6.74722	-4.87508	-2.82021	-0.659611	1.52571	3.65384	5.645	7.42456	8.92581	10.0925	10.8808	11.2613	11.2196	10.7574	9.8919	8.65562	7.09488	5.26819	3.24402	1.09824	-1.0887	-3.23484
0.77769	45.3691	76.3909	11.3473				11.3473	11.1335	10.5002	9.47121	8.08535	6.39483	4.46334	2.36366	0.174927	-2.0204	-4.1396	-6.10282	-7.83607	-9.27405	-10.3626	-11.0606	-11.3419	-11.1958	-10.6278	-9.65937	-8.32695	-6.68076	-4.78283	-2.70468	-0.524613	1.67522	3.81193	5.805	7.57934	9.06807	10.2151	10.9772	11.3257	11.2474	10.7453	9.83834	8.56063	6.96034	5.09778	3.04312	0.873801	-1.32845	-3.48064
0.77971	45.5008	76.6616	11.5171				11.5171	11.2989	10.6529	9.60329	8.18998	6.46646	4.49801	2.35919	0.131019	-2.10212	-4.25563	-6.24796	-8.00364	-9.45616	-10.5505	-11.2453	-11.5141	-11.3468	-10.7497	-9.74544	-8.37208	-6.6816	-4.73806	-2.61505	-0.392989	1.84395	4.01106	6.02623	7.81315	9.30414	10.4427	11.1858	11.5051	11.3887	10.8409	9.88255	8.54984	6.89329	4.97565	2.86955	0.654755	-1.58484	-3.7644
0.78173	45.6371	76.6721	11.5899				11.5899	11.3692	10.7158	9.65431	8.22529	6.48311	4.4941	2.33399	0.0850263	-2.16718	-4.33687	-6.34145	-8.1046	-9.55918	-10.6498	-11.335	-11.5886	-11.401	-10.7794	-9.74735	-8.3442	-6.62336	-4.65036	-2.50031	-0.255061	1.9999	4.17871	6.19844	7.98217	9.462	10.5816	11.2983	11.5849	11.4304	10.8407	9.8383	8.46132	6.7622	4.80562	2.66608	0.42504	-1.83218	-4.01965
0.78375	45.3265	76.2395	11.6641				11.6641	11.4409	10.7799	9.70635	8.26135	6.5002	4.49029	2.30854	0.0384486	-2.23311	-4.41922	-6.43621	-8.20689	-9.6635	-10.7503	-11.4257	-11.6639	-11.4556	-10.809	-9.74878	-8.31545	-6.5639	-4.56116	-2.38387	-0.115344	2.15759	4.34796	6.37193	8.15206	9.62022	10.7202	11.41	11.6631	11.4699	10.8377	9.79079	8.3692	6.62733	4.63183	2.45909	0.192235	-2.08197	-4.27651
0.78578	44.9183	75.3777	11.6125				11.6125	11.3891	10.7277	9.65357	8.20812	6.44694	4.43776	2.25787	-0.00886814	-2.27527	-4.45414	-6.46168	-8.22066	-9.66342	-10.7345	-11.3926	-11.6125	-11.3857	-10.7209	-9.6437	-8.19557	-6.43218	-4.42136	-2.24047	0.0266044	2.29266	4.47052	6.47641	8.23318	9.67324	10.7412	11.396	11.6124	11.3822	10.714	9.63381	8.18299	6.4174	4.40496	2.22306	-0.0443406	-2.31004	-4.48688
0.7878	45.3386	75.0426	11.4414				11.4414	11.2202	10.5652	9.5017	8.07083	6.3279	4.34032	2.18492	-0.0549605	-2.29271	-4.44182	-6.41919	-8.14836	-9.56249	-10.6069	-11.2412	-11.4409	-11.1982	-10.5225	-9.44003	-7.99254	-6.23603	-4.23841	-2.07692	0.164876	2.4003	4.54291	6.50988	8.22515	9.6224	10.6476	11.2611	11.4393	11.1751	10.4789	9.37748	7.91352	6.14359	4.13612	1.96873	-0.274777	-2.50766	-4.64359
0.78982	45.7288	74.9211	11.36				11.36	11.1393	10.4857	9.42455	7.99717	6.259	4.27759	2.12995	-0.100463	-2.32697	-4.46305	-6.42569	-8.13861	-9.53525	-10.5613	-11.177	-11.3583	-11.0982	-10.4067	-9.3109	-7.85322	-6.09035	-4.09079	-1.93226	0.301358	2.52327	4.64712	6.59037	8.27751	9.64297	10.6337	11.2112	11.3529	11.0535	10.3245	9.19433	7.70681	5.91979	3.90271	1.73397	-0.502159	-2.71877	-4.82973
0.79184	45.7381	74.8406	11.4414				11.4414	11.218	10.5564	9.48239	8.03803	6.27971	4.27611	2.10547	-0.147404	-2.39452	-4.54811	-6.52404	-8.24515	-9.64419	-10.6665	-11.2722	-11.4376	-11.1563	-10.4392	-9.31428	-7.82559	-6.03122	-4.00127	-1.81502	0.442113	2.68198	4.81709	6.76404	8.44679	9.7996	10.7696	11.319	11.4262	11.0872	10.315	9.14	7.60794	5.77871	3.72377	1.52337	-0.736529	-2.96766	-5.08287
0.79387	45.4773	74.8727	11.6755				11.6755	11.4464	10.7678	9.66645	8.18562	6.38342	4.33061	2.10777	-0.197817	-2.49564	-4.69548	-6.71097	-8.463	-9.88276	-10.9145	-11.5178	-11.6688	-11.3618	-10.6087	-9.43905	-7.89885	-6.04854	-3.96076	-1.71748	0.593224	2.88064	5.05496	7.03082	8.73065	10.0877	11.0487	11.576	11.6487	11.2642	10.4374	9.2008	7.603	5.70671	3.58636	1.32522	-0.98795	-3.26234	-5.40864
0.79589	45.431	73.7606	11.3672				11.3672	11.1429	10.4789	9.40148	7.95304	6.19077	4.18422	2.01257	-0.238508	-2.48017	-4.62396	-6.5853	-8.28678	-9.66127	-10.6545	-11.2274	-11.3572	-11.0388	-10.2849	-9.12513	-7.60529	-5.78535	-3.73711	-1.54142	0.715103	2.94341	5.05556	6.96823	8.60593	9.90405	10.8114	11.292	11.3272	10.9153	10.0727	8.83272	7.24415	5.36973	3.28342	1.06755	-1.19044	-3.40146	-5.47826
0.79791	45.4504	73.4939	11.367				11.367	11.1416	10.4744	9.39168	7.93652	6.16661	4.15213	1.97298	-0.284416	-2.53053	-4.67629	-6.63659	-8.33368	-9.70027	-10.6821	-11.2404	-11.3528	-11.015	-10.2404	-9.05957	-7.51949	-5.68119	-3.61757	-1.41049	0.852535	3.08175	5.18874	7.08995	8.70998	9.98457	10.8632	11.311	11.3102	10.8608	9.9807	8.70477	7.08362	5.18154	3.07396	0.844465	-1.41852	-3.62524	-5.6882
0.79993	45.3293	73.4901	11.5306				11.5306	11.3008	10.6206	9.51699	8.03405	6.23088	4.17934	1.96122	-0.335075	-2.61802	-4.7966	-6.784	-8.50098	-9.87912	-10.8635	-11.4148	-11.5112	-11.1487	-10.3418	-9.12271	-7.53998	-5.65671	-3.54797	-1.2978	1.00409	3.26597	5.39766	7.3142	8.9392	10.2079	11.0697	11.4902	11.4528	10.9589	10.0281	8.69761	7.02044	5.06344	2.90461	0.629998	-1.66972	-3.90289	-5.98048
0.80196	45.2211	73.0902	11.5275				11.5275	11.2966	10.6131	9.50444	8.01504	6.20453	4.14546	1.92031	-0.381762	-2.66854	-4.84842	-6.83406	-8.54591	-9.9154	-10.8877	-11.4237	-11.5022	-11.1198	-10.292	-9.05179	-7.44899	-5.54778	-3.42431	-1.16366	1.14361	3.40507	5.53011	7.43361	9.0393	10.2829	11.1145	11.5008	11.4264	10.8943	9.92567	8.55942	6.85027	4.86669	2.68814	0.4019	-1.90044	-4.12665	-6.18754
0.80398	45.0598	72.9386	11.6481				11.6481	11.4136	10.7196	9.59393	8.082	6.24466	4.1559	1.8998	-0.432787	-2.74795	-4.95247	-6.95759	-8.68258	-10.058	-11.0284	-11.5548	-11.616	-11.2094	-10.3516	-9.07691	-7.4368	-5.49725	-3.33637	-1.04116	1.29597	3.58092	5.7217	7.6321	9.23521	10.4665	11.2763	11.6322	11.5197	10.9433	9.92638	8.50977	6.75053	4.71949	2.49843	0.176772	-2.152	-4.39413	-6.45933
0.806	45.1216	72.7535	11.6614				11.6614	11.4255	10.7272	9.59487	8.07426	6.22693	4.12762	1.86129	-0.480358	-2.80257	-5.01137	-7.01739	-8.73945	-10.1079	-11.0673	-11.5788	-11.6219	-11.1946	-10.3144	-9.01675	-7.35427	-5.3942	-3.21585	-0.907379	1.43781	3.72482	5.86111	7.76023	9.34532	10.5523	11.3322	11.6536	11.5034	10.8877	9.8315	8.37743	6.58436	4.52486	2.28226	-0.0526904	-2.38551	-4.6218	-6.67107
0.80802	45.0849	72.2502	11.5798				11.5798	11.3444	10.6476	9.51775	8.00087	6.15862	4.06591	1.80785	-0.523736	-2.83402	-5.02905	-7.01956	-8.7246	-10.0748	-11.0154	-11.5079	-11.5325	-11.088	-10.1927	-8.88279	-7.21168	-5.24728	-3.0695	-0.766881	1.56692	3.837	5.95104	7.82307	9.37695	10.5495	11.293	11.5773	11.3907	10.7409	9.65435	8.17514	6.36347	4.29301	2.04797	-0.28036	-2.59729	-4.80859	-6.82434
0.81005	44.8566	71.7798	11.5925				11.5925	11.3556	10.6545	9.51806	7.99256	6.1404	4.03727	1.76913	-0.571319	-2.88841	-5.08746	-7.07857	-8.78037	-10.1233	-11.0525	-11.5299	-11.5361	-11.0709	-10.1531	-8.82034	-7.1271	-5.14257	-2.94785	-0.632651	1.70841	3.97964	6.08822	7.94796	9.48287	10.6302	11.343	11.5923	11.3677	10.6786	9.55298	8.03693	6.1924	4.09478	1.8298	-0.509971	-2.8289	-5.0322	-7.02983
0.81207	44.882	71.4551	11.5563				11.5563	11.3189	10.6167	9.47834	7.95068	6.09646	3.99182	1.72322	-0.616161	-2.93023	-5.12395	-7.10719	-8.79852	-10.1284	-11.0423	-11.5027	-11.4906	-11.0065	-10.0703	-8.72045	-7.01244	-5.01639	-2.8143	-0.49661	1.84148	4.10393	6.19781	8.03711	9.5463	10.6634	11.3425	11.5556	11.2942	10.5688	9.40936	7.8634	5.99445	3.87928	1.60478	-0.735646	-3.04585	-5.23095	-7.20119
0.81409	44.6075	71.1872	11.6745				11.6745	11.4336	10.7207	9.56521	8.01492	6.13379	3.99946	1.70004	-0.66956	-3.01152	-5.22916	-7.23096	-8.93427	-10.2688	-11.1794	-11.6286	-11.5977	-11.0881	-10.1209	-8.73579	-6.99012	-4.95591	-2.71713	-0.366187	1.99987	4.28338	6.39007	8.23299	9.73606	10.8372	11.4911	11.6706	11.3683	10.5968	9.38788	7.79143	5.87335	3.71283	1.39905	-0.972479	-3.30387	-5.49888	-7.4669
0.81611	44.2861	71.0596	11.8768				11.8768	11.6305	10.9017	9.72062	8.13633	6.21453	4.03493	1.68794	-0.729059	-3.11582	-5.37333	-7.40793	-9.13523	-10.4836	-11.397	-11.8377	-11.7873	-11.2479	-10.242	-8.81114	-7.0148	-4.92746	-2.63571	-0.234629	2.17619	4.49673	6.63073	8.48967	9.99644	11.0885	11.7206	11.8665	11.5201	10.6959	9.42792	7.76887	5.78754	3.56612	1.19677	-1.22222	-3.59052	-5.80986	-7.7882
0.81814	44.49	70.7001	11.743				11.743	11.4982	10.7741	9.60081	8.02728	6.11909	3.95582	1.62762	-0.768425	-3.13244	-5.36586	-7.37559	-9.07784	-10.4016	-11.2918	-11.7112	-11.6424	-11.0883	-10.0718	-8.63554	-6.83923	-4.75779	-2.47801	-0.0949291	2.29211	4.5836	6.684	8.50575	9.97291	11.0243	11.6161	11.7237	11.3425	10.4884	9.19708	7.52236	5.53403	3.315	0.95777	-1.43939	-3.77654	-5.95626	-7.88766
0.82016	44.6177	70.4616	11.6937				11.6937	11.4488	10.7242	9.5503	7.97632	6.06819	3.90583	1.57984	-0.812334	-3.17048	-5.3958	-7.39506	-9.08452	-10.3934	-11.2668	-11.6682	-11.5808	-11.0083	-9.9745	-8.52286	-6.71416	-4.62418	-2.34047	0.0412906	2.42132	4.69992	6.78161	8.57919	10.0174	11.0358	11.592	11.6625	11.2444	10.3553	9.03229	7.33091	5.3224	3.09091	0.729933	-1.66163	-3.98357	-6.13863	-8.03651
0.82218	44.6221	69.7767	11.4944				11.4944	11.2524	10.5367	9.37746	7.82338	5.93993	3.80641	1.51264	-0.844807	-3.16669	-5.35526	-7.31837	-8.97337	-10.2506	-11.0963	-11.4748	-11.3702	-10.7869	-9.74955	-8.3017	-6.50434	-4.43315	-2.17532	0.174088	2.51617	4.75232	6.78839	8.53867	9.92947	10.9022	11.416	11.4492	11.0003	10.0884	8.75169	7.04656	5.04476	2.83058	0.497226	-1.85706	-4.13316	-6.23525	-8.07484
0.8242	44.4648	69.2471	11.436				11.436	11.194	10.4786	9.31975	7.76666	5.88499	3.75435	1.46487	-0.886582	-3.20053	-5.37907	-7.33004	-8.9709	-10.2322	-11.0607	-11.4212	-11.2985	-10.6978	-9.64452	-8.18322	-6.37571	-4.29847	-2.03937	0.306001	2.63843	4.85924	6.87446	8.59886	9.95946	10.8987	11.3769	11.3737	10.8894	9.94437	8.57863	6.84995	4.83148	2.60861	0.27537	-2.06952	-4.32685	-6.40113	-8.20459
0.82623	44.3806	68.7969	11.3785				11.3785	11.1366	10.4212	9.26284	7.71064	5.83063	3.70273	1.41741	-0.928174	-3.23429	-5.40291	-7.34182	-8.9686	-10.2141	-11.0253	-11.3678	-11.227	-10.6089	-9.53977	-8.06505	-6.24745	-4.16424	-1.90399	0.437206	2.75982	4.96509	6.95928	8.6576	9.98785	10.8935	11.3359	11.2965	10.7768	9.79888	8.4044	6.6526	4.61798	2.38702	0.0545781	-2.28018	-4.518	-6.56374	-8.33043
0.82825	44.4233	68.8103	11.4763				11.4763	11.2312	10.5062	9.33241	7.75991	5.85588	3.70168	1.38934	-0.98236	-3.31209	-5.50032	-7.45357	-9.08838	-10.3349	-11.1399	-11.469	-11.3082	-10.6642	-9.56458	-8.05638	-6.204	-4.08657	-1.79455	0.574134	2.91829	5.13777	7.13775	8.8328	10.1505	11.0345	11.4472	11.3707	10.8085	9.78459	8.34262	6.54423	4.46626	2.19748	-0.165177	-2.52078	-4.76869	-6.81287	-8.56599
0.83027	44.1185	68.7844	11.7212				11.7212	11.4696	10.7257	9.52122	7.90804	5.95537	3.74704	1.37785	-1.0505	-3.43374	-5.66958	-7.66202	-9.32553	-10.5887	-11.3973	-11.7166	-11.5329	-10.8542	-9.7094	-8.14783	-6.23647	-4.05738	-1.70411	0.722315	3.11773	5.37931	7.40995	9.12249	10.4434	11.316	11.7028	11.5871	10.9741	9.88993	8.38119	6.51266	4.36453	2.02904	-0.393564	-2.79927	-5.0848	-7.15204	-8.91225
0.83229	43.9375	68.4897	11.7812				11.7812	11.5271	10.7757	9.55949	7.9309	5.96018	3.73236	1.34353	-1.10326	-3.50246	-5.75057	-7.7506	-9.41629	-10.6758	-11.4747	-11.7787	-11.5745	-10.8711	-9.69866	-8.10786	-6.1673	-3.96069	-1.58323	0.862534	3.27109	5.53853	7.56705	9.26914	10.5714	11.4176	11.7713	11.6171	10.9619	9.83375	8.2814	6.37181	4.18735	1.82226	-0.621443	-3.03834	-5.32417	-7.38032	-9.1181
0.83432	44.374	68.0714	11.4824				11.4824	11.2335	10.4977	9.30681	7.7125	5.78387	3.60452	1.26892	-1.12169	-3.46367	-5.65551	-7.60219	-9.21933	-10.4368	-11.2019	-11.4814	-11.2632	-10.5568	-9.39274	-7.82153	-5.91127	-3.74477	-1.41594	0.974267	3.32224	5.5262	7.49061	9.13032	10.3742	11.1685	11.4786	11.2911	10.6141	9.47711	7.92926	6.03769	3.8844	1.56273	-0.826685	-3.18026	-5.39598	-7.3778	-9.0398
0.83634	44.8111	67.421	11.0619				11.0619	10.821	10.1087	8.95616	7.41349	5.54791	3.44068	1.18358	-1.12508	-3.38472	-5.49694	-7.36973	-8.9215	-10.0847	-10.8086	-11.0617	-10.833	-10.1325	-8.99055	-7.45704	-5.59872	-3.49653	-1.24205	1.06654	3.32867	5.44582	7.32575	8.8866	10.0604	10.7959	11.0613	10.8448	10.1559	9.0247	7.50038	5.64937	3.55229	1.30048	-1.00798	-3.27253	-5.39454	-7.28158	-8.85145
0.83836	44.772	67.4118	11.1839				11.1839	10.9392	10.2157	9.04504	7.47852	5.58468	3.44642	1.15732	-1.18243	-3.47043	-5.60654	-7.49727	-9.05986	-10.2259	-10.9444	-11.1839	-10.9339	-10.2054	-9.03016	-7.45973	-5.5628	-3.4224	-1.13221	1.20753	3.49442	5.62837	7.51598	9.07464	10.2361	10.9496	11.1838	10.9286	10.195	9.01525	7.4409	5.54088	3.39835	1.10709	-1.23263	-3.5184	-5.65018	-7.53466	-9.08937
0.84039	44.3463	67.2099	11.4043				11.4043	11.1535	10.4122	9.21299	7.60861	5.66961	3.48126	1.13982	-1.25176	-3.58828	-5.76699	-7.69208	-9.27888	-10.4576	-11.1764	-11.4037	-11.1295	-10.3658	-9.1462	-7.52439	-5.57167	-3.37391	-1.02777	1.36357	3.69494	5.86382	7.77481	9.34387	10.502	11.1983	11.402	11.1044	10.3183	9.07853	7.43945	5.47319	3.26623	0.915621	-1.47525	-3.80125	-5.96007	-7.85677	-9.40794
0.84241	44.217	66.9236	11.4352				11.4352	11.1826	10.4358	9.2278	7.61206	5.65994	3.45771	1.10269	-1.30107	-3.64732	-5.83241	-7.75976	-9.34421	-10.5157	-11.2226	-11.4335	-11.1392	-10.3526	-9.10859	-7.46204	-5.48575	-3.26705	-0.903973	1.49905	3.83583	6.0031	7.9051	9.45777	10.5925	11.2592	11.4283	11.0924	10.2663	8.9866	7.30975	5.30989	3.07539	0.704983	-1.69657	-4.02316	-6.17197	-8.04803	-9.56846
0.84443	44.1145	66.4903	11.3771				11.3771	11.1245	10.378	9.17071	7.5562	5.60619	3.40726	1.05704	-1.34011	-3.67776	-5.85211	-7.76662	-9.33629	-10.4914	-11.1807	-11.3736	-11.0614	-10.2581	-8.99939	-7.34106	-5.35677	-3.13464	-0.773321	1.62233	3.94595	6.09436	7.97218	9.49602	10.5982	11.2299	11.3629	10.9914	10.1318	8.82244	7.12131	5.10399	2.86005	0.489113	-1.90354	-4.21167	-6.3328	-8.17275	-9.64981
0.84645	43.9575	66.3617	11.501				11.501	11.2444	10.4862	9.26021	7.62107	5.64193	3.41108	1.02806	-1.40082	-3.76721	-5.96554	-7.89772	-9.47756	-10.6346	-11.3172	-11.4949	-11.1597	-10.3267	-9.03301	-7.33631	-5.31232	-3.05133	-0.654212	1.77209	4.11934	6.28281	8.16599	9.68485	10.7717	11.3779	11.4765	11.0632	10.1562	8.79622	7.04377	4.97707	2.68834	0.279666	-2.14148	-4.46709	-6.59341	-8.42558	-9.88186
0.84848	43.8511	66.1728	11.569				11.569	11.3097	10.5434	9.30451	7.64853	5.64969	3.3976	0.993202	-1.45571	-3.83938	-6.05093	-7.99125	-9.57334	-10.7263	-11.3984	-11.5596	-11.2026	-10.3435	-9.02063	-7.29344	-5.23931	-2.95033	-0.529084	1.91587	4.27495	6.4424	8.32105	9.82671	10.8919	11.4688	11.5316	11.0775	10.1268	8.72218	6.92657	4.82047	2.49828	0.0641107	-2.37294	-4.70361	-6.82345	-8.63741	-10.0642
0.8505	43.8424	65.7056	11.4396				11.4396	11.182	10.4207	9.19013	7.54563	5.56127	3.32645	0.941798	-1.48527	-3.84544	-6.03242	-7.9477	-9.50502	-10.6342	-11.2845	-11.4265	-11.0539	-10.1834	-8.85426	-7.12633	-5.07744	-2.79986	-0.396176	2.02535	4.35566	6.48979	8.33162	9.79821	10.8235	11.3613	11.3874	10.9006	9.92285	8.49819	6.69077	4.58201	2.26688	-0.15035	-2.56081	-4.85593	-6.93234	-8.69653	-10.069
0.85252	43.93	65.4696	11.3777				11.3777	11.1203	10.3596	9.13017	7.48754	5.50609	3.27546	0.896617	-1.5228	-3.87331	-6.04855	-7.95007	-9.49182	-10.604	-11.2364	-11.3603	-10.9701	-10.0835	-8.74055	-7.00208	-4.94676	-2.66758	-0.267682	2.14433	4.4593	6.57248	8.38823	9.82439	10.816	11.3181	11.3081	10.7863	9.77643	8.32414	6.49517	4.37227	2.05152	-0.362073	-2.75928	-5.03162	-7.07627	-8.8007	-10.1269
0.85454	43.6804	65.2639	11.5094				11.5094	11.2477	10.4747	9.22538	7.55665	5.54434	3.27994	0.866425	-1.58649	-3.96727	-6.16767	-8.08765	-9.63991	-10.7539	-11.3789	-11.4866	-11.072	-10.154	-8.77432	-6.99572	-4.89905	-2.57963	-0.142931	2.30027	4.63889	6.76659	8.58664	10.0163	10.9905	11.4651	11.4183	10.8524	9.7931	8.28853	6.4071	4.23437	1.86911	-0.581129	-3.00495	-5.29214	-7.33872	-9.05163	-10.353
0.85657	43.3926	65.0042	11.6342				11.6342	11.3685	10.5834	9.31488	7.62081	5.57861	3.28156	0.834608	-1.65047	-4.06016	-6.28437	-8.22149	-9.78304	-10.8977	-11.5145	-11.6053	-11.166	-10.2165	-8.80039	-6.98222	-4.8451	-2.48664	-0.0145891	2.45813	4.81856	6.95886	8.78127	10.2025	11.1577	11.6032	11.5186	10.9079	9.79881	8.24211	6.3089	4.08749	1.67935	-0.805502	-3.25356	-5.55299	-7.59874	-9.29737	-10.5713
0.85859	43.4609	64.7922	11.5921				11.5921	11.3261	10.5402	9.27059	7.57549	5.53269	3.23596	0.790705	-1.69084	-4.09478	-6.31078	-8.23713	-9.78543	-10.8846	-11.4842	-11.5567	-11.0988	-10.1315	-8.69921	-6.86763	-4.72085	-2.3574	0.11425	2.58066	4.92862	7.05037	8.84854	10.2406	11.1626	11.5723	11.4509	10.8039	9.66103	8.07477	6.11789	3.88022	1.46446	-1.01851	-3.45473	-5.7324	-7.74696	-9.40597	-10.6333
0.86061	43.5665	64.8273	11.6629				11.6629	11.394	10.5997	9.31659	7.6039	5.54058	3.22177	0.754397	-1.74776	-4.16933	-6.39864	-8.33289	-9.8829	-10.9772	-11.5653	-11.6201	-11.139	-10.1444	-8.68191	-6.8191	-4.64186	-2.25057	0.244506	2.7283	5.08629	7.20974	9.00073	10.3767	11.2741	11.6517	11.492	10.8024	9.61461	7.9835	5.98426	3.70907	1.26284	-1.24161	-3.68882	-5.96592	-7.96793	-9.60251	-10.7943
0.86263	43.2953	64.3642	11.6664				11.6664	11.3962	10.598	9.3088	7.58835	5.51634	3.18877	0.713469	-1.79488	-4.22008	-6.44977	-8.38066	-9.92328	-11.0062	-11.5792	-11.6157	-11.1142	-10.0977	-8.61339	-6.73007	-4.53495	-2.12973	0.374149	2.8607	5.21471	7.32714	9.10012	10.4515	11.3187	11.6615	11.4641	10.7355	9.50959	7.84311	5.81328	3.51414	1.05218	-1.45851	-3.90164	-6.16401	-8.14082	-9.74047	-10.8889
0.86466	43.3262	64.5312	11.8528				11.8528	11.5769	10.7622	9.44658	7.69124	5.57792	3.20496	0.682831	-1.87108	-4.33791	-6.60282	-8.5604	-10.1195	-11.2076	-11.7741	-11.7925	-11.262	-10.2073	-8.67756	-6.74388	-4.49629	-2.03943	0.512366	3.04031	5.42674	7.56058	9.34251	10.6896	11.5391	11.8515	11.6123	10.8326	9.54868	7.82031	5.72793	3.36895	0.853154	-1.70235	-4.17862	-6.46039	-8.44146	-10.0296	-11.1509
0.86668	42.9744	64.3338	12.051				12.051	11.7692	10.9371	9.59354	7.80135	5.64434	3.2234	0.651718	-1.95044	-4.46139	-6.76371	-8.74975	-10.3266	-11.4206	-11.9805	-11.9802	-11.4197	-10.3251	-8.74772	-6.76127	-4.45865	-1.94753	0.654662	3.22624	5.64695	7.80359	9.59532	10.9384	11.7699	12.051	11.7686	10.9359	9.59175	7.7991	5.64174	3.22056	0.648773	-1.95335	-4.46413	-6.76615	-8.75177	-10.3281	-11.4215
0.8687	42.858	63.9391	12.0053				12.0053	11.7233	10.8906	9.54616	7.75328	5.59615	3.17612	0.606867	-1.99089	-4.49512	-6.78817	-8.76231	-10.3248	-11.4022	-11.944	-11.9246	-11.345	-10.2324	-8.63915	-6.63999	-4.32888	-1.8144	0.785321	3.34815	5.75367	7.8889	9.6535	10.9646	11.7605	12.004	11.6835	10.8141	9.43671	7.61595	5.43739	3.00338	0.428279	-2.16695	-4.66037	-6.93485	-8.88353	-10.4149	-11.4569
0.87072	43.2134	63.0705	11.4138				11.4138	11.1445	10.3491	9.06533	7.35366	5.29492	2.98626	0.536667	-1.93826	-4.32171	-6.50118	-8.37381	-9.85121	-10.8637	-11.3634	-11.3268	-10.7555	-9.67669	-8.14112	-6.22131	-4.00786	-1.60526	0.873115	3.31028	5.5912	7.60823	9.26617	10.4868	11.2124	11.4089	11.0668	10.2025	8.85658	7.09268	4.99402	2.65965	0.199751	-2.26957	-4.63178	-6.77538	-8.59919	-10.0171	-10.9623
0.87275	43.3734	62.5491	11.1252				11.1252	10.8615	10.0827	8.82582	7.15044	5.13601	2.87805	0.483616	-1.93375	-4.25942	-6.38312	-8.20415	-9.63617	-10.6113	-11.0832	-11.0296	-10.453	-9.38077	-7.86371	-5.97378	-3.80059	-1.44719	0.974833	3.35063	5.56756	7.52048	9.11681	10.2808	10.9574	11.1144	10.7443	9.86481	8.51754	6.7664	4.69441	2.39983	-0.00854826	-2.41652	-4.70991	-6.77996	-8.52853	-9.8727	-10.7487
0.87477	43.2441	62.4412	11.2411				11.2411	10.9734	10.1829	8.90737	7.20751	5.16432	2.87511	0.44895	-1.9986	-4.35094	-6.49602	-8.33166	-9.77041	-10.7437	-11.2053	-11.133	-10.5305	-9.42625	-7.87301	-5.94474	-3.73328	-1.34399	1.10933	3.50981	5.74309	7.70279	9.29556	10.4455	11.0979	11.2216	10.8108	9.88498	8.48828	6.68724	4.56763	2.23045	-0.212988	-2.64628	-4.95351	-7.02478	-8.76141	-10.0807	-10.9198
0.87679	43.3899	62.2495	11.1459				11.1459	10.8792	10.0919	8.8216	7.12916	5.09556	2.8181	0.405775	-2.02596	-4.36075	-6.48685	-8.30252	-9.72087	-10.674	-11.1164	-11.0267	-10.4094	-9.29392	-7.73368	-5.80335	-3.59529	-1.21517	1.22309	3.60283	5.81014	7.73942	9.29832	10.4122	11.0279	11.1158	10.6717	9.71697	8.2972	6.48037	4.35342	2.01813	-0.413734	-2.8258	-5.10264	-7.13528	-8.82647	-10.0953	-10.8809
0.87881	43.2838	62.1369	11.2451				11.2451	10.9748	10.1769	8.88968	7.17513	5.11563	2.81019	0.369659	-2.08865	-4.44654	-6.59067	-8.41794	-9.84053	-10.79	-11.2208	-11.1121	-10.4692	-9.32299	-7.72857	-5.7626	-3.51959	-1.10738	1.35807	3.75824	5.97772	7.90982	9.46166	10.5586	11.148	11.2014	10.7163	9.716	8.24861	6.38467	4.21378	1.84031	-0.62163	-3.05369	-5.33893	-7.36751	-9.04189	-10.2816	-11.027
0.88084	43.2999	62.1027	11.3191				11.3191	11.0457	10.2389	8.93761	7.20463	5.12369	2.7953	0.331899	-2.14753	-4.52324	-6.68049	-8.5151	-9.93845	-10.8818	-11.2996	-11.1717	-10.5042	-9.32938	-7.70399	-5.70653	-3.43345	-0.994556	1.49237	3.90723	6.13338	8.0633	9.60379	10.6805	11.2413	11.2592	10.7333	9.68907	8.17686	6.26973	4.0598	1.65379	-0.832088	-3.27778	-5.56517	-7.58378	-9.23611	-10.4424	-11.1443
0.88286	43.2467	61.6777	11.1974				11.1974	10.9258	10.124	8.83112	7.10973	5.04339	2.73236	0.288764	-2.16884	-4.52123	-6.65425	-8.46442	-9.86392	-10.7848	-11.1825	-11.0376	-10.3572	-9.17432	-7.5463	-5.55214	-3.28861	-0.865524	1.59956	3.98703	6.18106	8.0752	9.57756	10.6152	11.1379	11.1201	10.5629	9.49312	7.96279	6.04612	3.83611	1.43998	-1.02601	-3.44223	-5.69144	-7.66451	-9.26572	-10.4174	-11.0636
0.88488	43.2894	61.3221	11.056				11.056	10.7866	9.99145	8.70931	7.0027	4.95478	2.66537	0.246046	-2.18526	-4.51007	-6.61506	-8.39763	-9.77092	-10.668	-11.0451	-10.8839	-10.1922	-9.00374	-7.37647	-5.38967	-3.14019	-0.737652	1.70084	4.05642	6.21431	8.06931	9.53103	10.5282	11.0123	10.9596	10.3727	9.28034	7.73563	5.81389	3.60879	1.2278	-1.21304	-3.59475	-5.80125	-7.72501	-9.27226	-10.3676	-10.9576
0.8869	43.2222	60.9851	10.9904				10.9904	10.7214	9.92738	8.64735	6.94394	4.90054	2.61721	0.205743	-2.2158	-4.52886	-6.62018	-8.38737	-9.74391	-10.6234	-10.9827	-10.8043	-10.0969	-8.89521	-7.25797	-5.26536	-3.01496	-0.616941	1.81128	4.15082	6.28714	8.11563	9.54677	10.5105	10.9596	10.8721	10.2524	9.13061	7.56182	5.6228	3.40848	1.02727	-1.40422	-3.76697	-5.94528	-7.83251	-9.33625	-10.3829	-10.9211
0.88893	42.8485	60.6362	11.1068				11.1068	10.8337	10.0277	8.72847	6.99998	4.92719	2.61207	0.168471	-2.28341	-4.62299	-6.73519	-8.51612	-9.87819	-10.7544	-11.1017	-10.9029	-10.1679	-8.9328	-7.25833	-5.22686	-2.93832	-0.505257	1.95266	4.31453	6.4642	8.29593	9.71963	10.6653	11.0864	10.9622	10.2988	9.1289	7.51	5.52172	3.26187	0.841578	-1.6201	-4.0021	-6.18726	-8.0681	-9.55212	-10.5663	-11.0608
0.89095	43.1372	60.3494	10.8455				10.8455	10.5776	9.78709	8.513	6.81831	4.78674	2.51868	0.126172	-2.27257	-4.55903	-6.62024	-8.35436	-9.67571	-10.519	-10.8426	-10.6305	-9.89316	-8.66703	-7.01269	-5.01187	-2.76343	-0.378449	2.02523	4.32884	6.41858	8.19119	9.5591	10.4547	10.8338	10.6776	9.99388	8.81638	7.20328	5.23428	3.00668	0.63052	-1.77679	-4.09631	-6.21345	-8.02359	-9.43732	-10.3848	-10.8191
0.89297	42.9783	60.3473	11.0439				11.0439	10.7698	9.96123	8.65828	6.92561	4.84923	2.53217	0.0894413	-2.35773	-4.68788	-6.78537	-8.5461	-9.88268	-10.7288	-11.0424	-10.808	-10.0372	-8.76818	-7.06404	-5.0093	-2.70595	-0.2683	2.18267	4.5253	6.64335	8.43168	9.80154	10.685	11.0381	10.8433	10.1105	8.87579	7.20061	5.16806	2.87902	0.447089	-2.00703	-4.36154	-6.49958	-8.31505	-9.71783	-10.6383	-11.0308
0.895	42.6057	60.2328	11.3103				11.3103	11.0283	10.1966	8.85644	7.07478	4.9404	2.55972	0.05142	-2.45944	-4.84769	-6.99425	-8.79211	-10.1516	-11.005	-11.3098	-11.0507	-10.2406	-8.92004	-7.15472	-5.03271	-2.65978	-0.154256	2.35896	4.75457	6.91314	8.72706	10.1059	10.9809	11.3084	11.0721	10.2839	8.98289	7.23407	5.1246	2.75963	0.257079	-2.25829	-4.66107	-6.83147	-8.66128	-10.0593	-10.9558	-11.3061
0.89702	42.7839	59.9084	11.0873				11.0873	10.8097	9.99072	8.67141	6.91784	4.81782	2.47653	0.0112129	-2.45467	-4.79762	-6.9003	-8.65742	-9.98098	-10.8047	-11.0873	-10.8147	-10.0004	-8.68537	-6.93535	-4.83801	-2.49838	-0.0336387	2.43279	4.77739	6.88273	8.64339	9.97119	10.7996	11.0872	10.8196	10.0101	8.69929	6.95283	4.85818	2.52023	0.0560643	-2.41091	-4.75714	-6.86514	-8.62933	-9.96136	-10.7945	-11.0871
0.89904	43.0279	59.1793	10.5518				10.5518	10.2864	9.50357	8.24263	6.56706	4.56112	2.32575	-0.0266293	-2.37766	-4.60909	-6.60866	-8.27578	-9.52659	-10.2982	-10.5517	-10.2744	-9.4803	-8.20928	-6.52528	-4.51304	-2.27377	0.0798874	2.42952	4.65694	6.65009	8.30872	9.54937	10.3096	10.5513	10.2622	9.4568	8.17571	6.48335	4.46484	2.22173	-0.133143	-2.48132	-4.70467	-6.69136	-8.34144	-9.5719	-10.3209	-10.5506
0.90106	42.926	58.8827	10.5185				10.5185	10.2528	9.46897	8.20667	6.5297	4.52277	2.28731	-0.063728	-2.41155	-4.63751	-6.62914	-8.2858	-9.52377	-10.2805	-10.5178	-10.2236	-9.41277	-8.12635	-6.42929	-4.40737	-2.16274	0.191175	2.53543	4.75157	6.72761	8.3637	9.57718	10.3067	10.5155	10.1929	9.3552	8.04483	6.32795	4.29132	2.03785	-0.318593	-2.65894	-4.86493	-6.82509	-8.44038	-9.62918	-10.3314	-10.5116
0.90309	42.6858	58.5983	10.5843				10.5843	10.3157	9.52348	8.24789	6.55366	4.52678	2.27014	-0.101726	-2.46843	-4.70984	-6.7122	-8.37386	-9.6105	-10.3593	-10.5823	-10.2682	-9.43295	-8.11887	-6.3927	-4.34205	-2.07101	0.30514	2.66581	4.89116	6.86826	8.49674	9.69396	10.3991	10.5765	10.217	9.33893	7.98684	6.22937	4.15571	1.87112	-0.508442	-2.8622	-5.07068	-7.02178	-8.61649	-9.77384	-10.4351	-10.5667
0.90511	42.5004	58.5535	10.7737				10.7737	10.499	9.68912	8.38522	6.65381	4.58317	2.27886	-0.141629	-2.5549	-4.83791	-6.87427	-8.56016	-9.80962	-10.5589	-10.77	-10.4319	-9.56192	-8.20448	-6.42875	-4.32526	-2.00125	0.424788	2.82917	5.08931	7.08998	8.72918	9.92334	10.6116	10.7588	10.3575	9.42812	8.01808	6.19925	4.06436	1.72226	-0.707653	-3.10148	-5.33719	-7.30079	-8.89217	-10.0302	-10.6568	-10.7402
0.90713	42.64	58.3821	10.6596				10.6596	10.3867	9.58183	8.28629	6.56642	4.51027	2.22316	-0.177807	-2.56967	-4.82993	-6.84285	-8.50535	-9.73229	-10.4608	-10.6537	-10.3009	-9.42069	-8.05801	-6.28267	-4.1856	-1.87418	0.533222	2.91331	5.14421	7.11168	8.71495	9.87193	10.5234	10.6359	10.2038	9.24908	7.82076	5.99193	3.85626	1.52311	-0.888044	-3.25372	-5.45277	-7.37258	-8.91484	-10.0006	-10.5742	-10.6063
0.90915	42.6656	58.578	10.8712				10.8712	10.5916	9.76721	8.4404	6.67945	4.57492	2.23506	-0.219759	-2.66328	-4.9698	-7.02069	-8.71045	-9.95217	-10.682	-10.8623	-10.4839	-9.56628	-8.15656	-6.32729	-4.17255	-1.80319	0.658918	3.08714	5.35656	7.35046	8.96626	10.1209	10.7549	10.8357	10.3591	9.34972	7.85938	5.96479	3.76337	1.36838	-1.097	-3.50595	-5.73457	-7.66821	-9.20742	-10.273	-10.8102	-10.7913
0.91118	42.3216	58.2431	10.9749				10.9749	10.6914	9.85549	8.51039	6.72558	4.59328	2.22367	-0.260835	-2.73186	-5.06174	-7.1301	-8.83007	-10.0738	-10.7971	-10.9625	-10.5615	-9.61489	-8.17147	-6.30586	-4.11445	-1.71045	0.781915	3.23388	5.51877	7.51852	9.12981	10.2694	10.8784	10.9254	10.4078	9.35257	7.8141	5.87189	3.62631	1.19337	-1.30123	-3.7286	-5.96332	-7.88994	-9.40892	-10.4418	-10.9351	-10.8635
0.9132	42.4856	57.9861	10.7797				10.7797	10.5	9.67542	8.34871	6.58875	4.48686	2.15213	-0.29429	-2.72543	-5.01514	-7.04459	-8.70846	-9.92041	-10.6175	-10.7637	-10.3512	-9.40159	-7.96407	-6.11326	-3.9452	-1.5724	0.881992	3.29062	5.52847	7.47943	9.04225	10.1358	10.7034	10.7155	10.1715	9.09973	7.55569	5.61955	3.39178	0.987993	-1.46706	-3.84599	-6.02533	-7.89198	-9.34908	-10.321	-10.7573	-10.6354
0.91522	42.5441	57.867	10.7508				10.7508	10.4706	9.64468	8.31601	6.55388	4.45013	2.11443	-0.331489	-2.76013	-5.0449	-7.06671	-8.72017	-9.91911	-10.601	-10.7304	-10.3004	-9.33358	-7.88023	-6.01613	-3.83844	-1.46069	0.993205	3.39533	5.62047	7.55266	9.09117	10.1558	10.6911	10.6691	10.091	8.98698	7.41447	5.4555	3.21216	0.801393	-1.65115	-4.01762	-6.17468	-8.00989	-9.4276	-10.3539	-10.7405	-10.5673
0.91724	42.3772	57.4002	10.6338				10.6338	10.3555	9.53499	8.2153	6.46552	4.37725	2.05982	-0.365452	-2.77159	-5.03263	-7.03019	-8.6597	-9.83585	-10.4971	-10.6087	-10.165	-9.18908	-7.73209	-5.87031	-3.7012	-1.33832	1.09463	3.47027	5.66423	7.56165	9.06319	10.0903	10.5891	10.5335	9.92646	8.79975	7.21235	5.24736	3.00766	0.61049	-1.81864	-4.15255	-6.26907	-8.05738	-9.42386	-10.297	-10.631	-10.4085
0.91927	42.5506	57.3118	10.5413				10.5413	10.2642	9.44727	8.13361	6.39225	4.31477	2.01039	-0.399695	-2.78877	-5.03119	-7.00906	-8.61836	-9.77448	-10.4166	-10.511	-10.0527	-9.06573	-7.60208	-5.73869	-3.57353	-1.22046	1.19679	3.5511	5.71869	7.58556	9.05355	10.0455	10.5092	10.4202	9.78337	8.63206	7.02684	5.05212	2.81174	0.423505	-1.987	-4.29302	-6.37329	-8.11843	-9.43667	-10.2587	-10.5413	-10.2696
0.92129	42.0916	57.2569	10.9253				10.9253	10.6368	9.78656	8.4194	6.60758	4.44678	2.05113	-0.452848	-2.93291	-5.25807	-7.30553	-8.96716	-10.1552	-10.8069	-10.8878	-10.3937	-9.35067	-7.81378	-5.86421	-3.60493	-1.15526	1.35543	3.79453	6.03323	7.95329	9.45329	10.454	10.9026	10.7754	10.0791	8.85052	7.15446	5.08055	2.73831	0.251443	-2.2487	-4.63008	-6.76693	-8.54638	-9.87446	-10.681	-10.9235	-10.589
0.92331	42.0235	56.9789	10.869				10.869	10.5807	9.73116	8.36544	6.55598	4.39875	2.00819	-0.488897	-2.96005	-5.27419	-7.30855	-8.95523	-10.1269	-10.7614	-10.825	-10.3144	-9.25669	-7.70795	-5.75035	-3.48772	-1.04008	1.46273	3.88795	6.10694	8.00197	9.47255	10.4406	10.8549	10.6934	9.96463	8.7073	6.98808	4.89818	2.54845	0.0635465	-2.42473	-4.78439	-6.89026	-8.63064	-9.9132	-10.6699	-10.8606	-10.4753
0.92533	42.3554	56.891	10.6566				10.6566	10.3728	9.53626	8.19171	6.41072	4.2882	1.93722	-0.516976	-2.94363	-5.21345	-7.20552	-8.8137	-9.95232	-10.5607	-10.6065	-10.0872	-9.03043	-7.4926	-5.55558	-3.32258	-0.91257	1.54606	3.92232	6.08962	7.93248	9.35273	10.2747	10.6493	10.4565	9.7066	8.43959	6.72295	4.64814	2.32569	-0.120666	-2.56059	-4.8641	-6.90846	-8.58477	-9.80371	-10.5003	-10.6376	-10.208
0.92736	42.1789	56.501	10.5925				10.5925	10.3091	9.47404	8.13206	6.35494	4.23776	1.89383	-0.551446	-2.96721	-5.2242	-7.20165	-8.79374	-9.91528	-10.5063	-10.5351	-10.0001	-8.9301	-7.38222	-5.43933	-3.20538	-0.799912	1.64836	4.00843	6.15401	7.97029	9.36008	10.249	10.5895	10.3634	9.58277	8.28934	6.55235	4.46476	2.13825	-0.302674	-2.7274	-5.00619	-7.01709	-8.65252	-9.82495	-10.4717	-10.558	-10.0795
0.92938	42.0275	56.7991	11.0204				11.0204	10.7243	9.85184	8.44991	6.59387	4.38346	1.93748	-0.612626	-3.12981	-5.47879	-7.53333	-9.18302	-10.3392	-10.9397	-10.9523	-10.3763	-9.24271	-7.61236	-5.5729	-3.23395	-0.721202	1.83031	4.28345	6.5064	8.37967	9.80262	10.6987	11.0199	10.7488	9.90011	8.51933	6.6807	4.48305	2.04447	-0.503991	-3.02536	-5.38415	-7.45357	-9.12244	-10.301	-10.926	-10.9639	-10.4125
0.9314	41.863	56.6912	11.1592				11.1592	10.858	9.9708	8.54542	6.6588	4.41278	1.92857	-0.659721	-3.21241	-5.59171	-7.6692	-9.33274	-10.4926	-11.086	-11.0812	-10.4782	-9.30965	-7.63863	-5.55531	-3.17215	-0.617779	1.96994	4.45133	6.69247	8.57238	9.9896	10.8676	11.1591	10.8482	9.95187	8.51834	6.62504	4.37416	1.88718	-0.701654	-3.25262	-5.62802	-7.69966	-9.35571	-10.5068	-11.0908	-11.0761	-10.4637
0.93342	41.7041	56.2121	11.0132				11.0132	10.7147	9.83539	8.42291	6.55384	4.32951	1.87047	-0.689952	-3.21298	-5.56183	-7.60919	-9.24408	-10.3779	-10.9491	-10.9268	-10.3121	-9.13852	-7.46952	-5.3956	-3.02921	-0.498607	2.05902	4.50504	6.70685	8.54509	9.92012	10.7574	11.0115	10.6688	9.74768	8.29818	6.39886	4.15266	1.68136	-0.881088	-3.39577	-5.72638	-7.74657	-9.34683	-10.4404	-10.9681	-10.9012	-10.2433
0.93545	41.775	55.8496	10.7775				10.7775	10.4841	9.61995	8.23205	6.39597	4.21168	1.79809	-0.713392	-3.18603	-5.48522	-7.48578	-9.07878	-10.1775	-10.7222	-10.6831	-10.0623	-8.89379	-7.24104	-5.19407	-2.86432	-0.378632	2.12767	4.51814	6.66263	8.44438	9.7664	10.5567	10.7723	10.4014	9.46419	8.01175	6.12313	3.90114	1.46677	-1.04746	-3.50466	-5.77106	-7.72327	-9.255	-10.2829	-10.7509	-10.6336	-9.93741
0.93747	41.7895	55.6468	10.7031				10.7031	10.4105	9.54869	8.16476	6.33442	4.15772	1.7537	-0.746217	-3.20533	-5.48918	-7.47291	-9.04803	-10.1284	-10.655	-10.5991	-9.96356	-8.78328	-7.12275	-5.07277	-2.74542	-0.267967	2.22414	4.59464	6.71392	8.4661	9.75537	10.5113	10.6924	10.2889	9.32289	7.8471	5.94224	3.71249	1.27974	-1.22297	-3.65882	-5.89462	-7.80811	-9.29468	-10.273	-10.6897	-10.5219	-9.77875
0.93949	41.9494	55.2615	10.3708				10.3708	10.0861	9.24751	7.90112	6.12087	4.0045	1.66825	-0.759618	-3.14577	-5.35918	-7.27831	-8.79777	-9.83413	-10.3305	-10.2596	-9.62527	-8.46244	-6.83491	-4.83207	-2.56389	-0.154924	2.26255	4.55579	6.59885	8.27956	9.50563	10.2097	10.3532	9.92812	8.95789	7.49576	5.62203	3.43958	1.06826	-1.36172	-3.71693	-5.86804	-7.69692	-9.10314	-10.0095	-10.3662	-10.1537	-9.38362
0.94151	42.0672	55.1311	10.2653				10.2653	9.98227	9.14872	7.81065	6.04184	3.93984	1.62057	-0.788075	-3.15326	-5.34454	-7.2411	-8.73832	-9.75365	-10.2311	-10.1443	-9.49812	-8.32812	-6.69884	-4.70015	-2.44225	-0.0496735	2.34564	4.61161	6.62325	8.26964	9.45999	10.1286	10.2387	9.78417	8.79004	7.31117	5.42911	3.24765	0.88709	-1.52239	-3.84792	-5.96124	-7.74582	-9.10324	-9.95863	-10.2648	-10.005	-9.19335
0.94354	41.9866	54.8607	10.2037				10.2037	9.92112	9.08908	7.75366	5.9888	3.89226	1.58015	-0.819479	-3.17372	-5.35219	-7.23422	-8.7156	-9.71427	-10.1749	-10.0721	-9.41134	-8.22939	-6.59167	-4.58886	-2.33191	0.0541917	2.43729	4.68541	6.67402	8.29301	9.45269	10.0888	10.1662	9.68056	8.65875	7.15738	5.25961	3.07053	0.711401	-1.68713	-3.99223	-6.07621	-7.82367	-9.13783	-9.94589	-10.2031	-9.89523	-9.03931
0.94556	41.6003	54.7544	10.5152				10.5152	10.2227	9.36171	7.97999	6.15441	3.98652	1.5969	-0.881541	-3.31095	-5.5562	-7.49242	-9.0119	-10.0301	-10.4905	-10.3674	-9.66759	-8.4301	-6.72373	-4.64338	-2.30477	0.162043	2.61984	4.93192	6.96968	8.61979	9.79046	10.4166	10.4633	9.92809	8.84065	7.2615	5.27845	3.00181	0.558215	-1.91643	-4.28449	-6.41423	-8.18722	-9.50483	-10.2938	-10.5102	-10.142	-9.20971
0.94758	41.2111	54.3656	10.6057				10.6057	10.3095	9.43741	8.0382	6.19	3.99604	1.57888	-0.926482	-3.38009	-5.64489	-7.59439	-9.11968	-10.1356	-10.5853	-10.4438	-9.71892	-8.45117	-6.71135	-4.59666	-2.22521	0.270532	2.75116	5.07812	7.12143	8.76696	9.92278	10.5244	10.5381	9.96314	8.8317	7.20695	5.17964	2.86301	0.386455	-2.11168	-4.49187	-6.62115	-8.38059	-9.67192	-10.423	-10.5919	-10.1691	-9.17834
0.94961	41.3191	54.4193	10.6527				10.6527	10.3539	9.47434	8.06327	6.19989	3.98872	1.5538	-0.968285	-3.43605	-5.71107	-7.66572	-9.19036	-10.1995	-10.6364	-10.4767	-9.7293	-8.43612	-6.66971	-4.52916	-2.13455	0.379807	2.87286	5.20475	7.24468	8.87821	10.0137	10.5875	10.5674	9.95444	8.78312	7.1191	5.05573	2.70876	0.209836	-2.30086	-4.68248	-6.80144	-8.53887	-9.7973	-10.5061	-10.6256	-10.1491	-9.10321
0.95163	41.5426	54.4554	10.5899				10.5899	10.2916	9.41359	8.00524	6.14593	3.9404	1.51289	-0.999851	-3.45626	-5.71797	-7.65757	-9.16578	-10.1577	-10.5773	-10.4011	-9.63899	-8.33387	-6.55926	-4.41515	-2.02232	0.484437	2.9639	5.2764	7.29166	8.89616	9.9995	10.5395	10.4858	9.84145	8.64265	6.95698	4.87939	2.52694	0.0321312	-2.46449	-4.82227	-6.9084	-8.60535	-9.81754	-10.4767	-10.5456	-10.0205	-8.93086
0.95365	41.4211	54.1974	10.5672				10.5672	10.2683	9.38849	7.97757	6.11534	3.90716	1.47794	-1.03489	-3.48917	-5.74606	-7.67789	-9.17537	-10.1538	-10.5578	-10.3645	-9.58487	-8.26302	-6.47371	-4.31818	-1.91836	0.589987	3.06496	5.36654	7.36452	8.94588	10.0212	10.5295	10.4422	9.76416	8.53374	6.82055	4.7215	2.35536	-0.144035	-2.63528	-4.97744	-7.03802	-8.70045	-9.87067	-10.4825	-10.5013	-9.92604	-8.78924
0.95567	41.5826	53.9625	10.3264				10.3264	10.0331	9.16977	7.78552	5.95897	3.79389	1.41328	-1.04763	-3.44902	-5.65446	-7.53868	-8.99462	-9.93957	-10.3198	-10.1138	-9.33327	-8.02247	-6.25591	-4.13394	-1.77713	0.680647	3.09975	5.34276	7.28224	8.80802	9.8334	10.3001	10.1817	9.48489	8.24921	6.54488	4.46874	2.13872	-0.3128	-2.74655	-5.02426	-7.01655	-8.61022	-9.71474	-10.2674	-10.2367	-9.62445	-8.46546
0.9577	41.6292	53.6957	10.1508				10.1508	9.86129	9.00913	7.643	5.84082	3.70542	1.35862	-1.06568	-3.4292	-5.59707	-7.44562	-8.86939	-9.78716	-10.1466	-9.92708	-9.14126	-7.83392	-6.07964	-3.97852	-1.65042	0.771845	3.15007	5.34858	7.24195	8.72216	9.70476	10.1337	9.98449	9.26566	8.01822	6.31333	4.24825	1.94081	-0.477354	-2.86829	-5.09558	-7.03217	-8.56756	-9.61417	-10.1123	-10.0335	-9.38224	-8.19575
0.95972	41.5576	53.0994	9.79154				9.79154	9.51106	8.68568	7.36269	5.61789	3.55123	1.28113	-1.06238	-3.34502	-5.43602	-7.21559	-8.58177	-9.45629	-9.78906	-9.561	-8.78519	-7.50607	-5.79691	-3.75565	-1.49922	0.843093	3.13711	5.2514	7.06483	8.47351	9.39674	9.78162	9.60611	8.88025	7.64564	5.973	3.95817	1.71656	-0.623381	-2.92761	-5.06412	-6.9105	-8.36097	-9.33243	-9.76924	-9.64635	-8.97082	-7.78134
0.96174	41.5694	52.8111	9.61755				9.61755	9.3409	8.52685	7.22225	5.50214	3.46549	1.22947	-1.07729	-3.32207	-5.37573	-7.12012	-8.45487	-9.30322	-9.61633	-9.37621	-8.59667	-7.32255	-5.62716	-3.60803	-1.38133	0.924845	3.17781	5.24795	7.01617	8.38075	9.26317	9.61267	9.40914	8.6643	7.42099	5.75074	3.74965	1.53284	-0.772163	-3.03274	-5.11884	-6.91045	-8.30449	-9.22077	-9.60656	-9.43968	-8.72973	-7.51755
0.96376	41.5969	52.9278	9.77557				9.77557	9.4932	8.66238	7.33113	5.57634	3.49939	1.22028	-1.12932	-3.41369	-5.50084	-7.2702	-8.61954	-9.47092	-9.77515	-9.51464	-8.70446	-7.39141	-5.65135	-3.58479	-1.31113	1.03827	3.32769	5.42486	7.20863	8.57594	9.44781	9.77386	9.53525	8.74578	7.45105	5.72586	3.66987	1.40187	-0.947118	-3.24139	-5.3484	-7.14643	-8.53159	-9.42387	-9.77171	-9.55503	-8.78633	-7.51003
0.96579	41.403	52.8483	9.9577				9.9577	9.66886	8.81908	7.45767	5.66362	3.54099	1.21293	-1.1855	-3.51514	-5.64086	-7.43933	-8.80622	-9.66221	-9.95766	-9.67543	-8.83188	-7.47596	-5.68632	-3.5668	-1.24035	1.15805	3.48928	5.61807	7.42094	8.79328	9.65549	9.95755	9.68192	8.84461	7.49418	5.70899	3.59259	1.26777	-1.1306	-3.46338	-5.59523	-7.40248	-8.78028	-9.6487	-9.95736	-9.68835	-8.85727	-7.51235
0.96781	41.2394	52.6205	9.98497				9.98497	9.69413	8.83855	7.46807	5.66253	3.52711	1.18622	-1.22378	-3.56248	-5.69365	-7.49313	-8.85609	-9.70313	-9.9849	-9.685	-8.82088	-7.44289	-5.63132	-3.49168	-1.14863	1.26133	3.59781	5.7247	7.51809	8.87351	9.71199	9.98469	9.67572	8.80308	7.41762	5.60003	3.4562	1.11104	-1.29886	-3.63308	-5.75566	-7.54294	-8.89079	-9.72071	-9.98433	-9.66631	-8.78516	-7.39223
0.96983	41.3599	52.3316	9.70633				9.70633	9.42243	8.58733	7.24989	5.48835	3.40574	1.12391	-1.22368	-3.49967	-5.57095	-7.31633	-8.63372	-9.44606	-9.70581	-9.3978	-8.54002	-7.18268	-5.40516	-3.31144	-1.02402	1.32331	3.59323	5.65295	7.38199	8.67919	9.46867	9.70425	9.37215	8.4918	7.11469	5.32139	3.21679	0.924016	-1.42281	-3.6864	-5.73435	-7.44685	-8.72372	-9.49027	-9.70165	-9.3455	-8.44266	-7.04594
0.97185	41.148	52.4091	10.0457				10.0457	9.75063	8.88282	7.49323	5.66348	3.50105	1.13296	-1.30168	-3.65985	-5.80305	-7.60536	-8.96093	-9.79013	-10.0442	-9.70835	-8.80218	-7.37896	-5.52229	-3.34124	-0.963919	1.47002	3.81761	5.94095	7.71531	9.03647	9.82682	10.0399	9.66328	8.71901	7.26257	5.37952	3.18047	0.794602	-1.63794	-3.97428	-6.07716	-7.82306	-9.10943	-9.8607	-10.0327	-9.61545	-8.63334	-7.1441
0.97388	40.8567	52.3239	10.3152				10.3152	10.011	9.11627	7.68382	5.79813	3.57044	1.13214	-1.37293	-3.79702	-5.99714	-7.84352	-9.22725	-10.0667	-10.3124	-9.94975	-9.00025	-7.51986	-5.59591	-3.34188	-0.890733	1.61296	4.0215	6.19284	7.99889	9.33313	10.1168	10.3038	9.883	8.87925	7.35174	5.39059	3.11148	0.648828	-1.85209	-4.24376	-6.38512	-8.14984	-9.43384	-10.1614	-10.2896	-9.81079	-8.75334	-7.17956
0.9759	41.0904	51.7672	9.68416				9.68416	9.39737	8.55398	7.20394	5.42723	3.32906	1.03371	-1.32286	-3.60108	-5.66601	-7.39535	-8.68666	-9.46348	-9.67978	-9.32275	-8.41355	-7.00602	-5.18353	-3.05402	-0.74363	1.61081	3.86984	5.89966	7.58006	8.81149	9.52102	9.66664	9.23971	8.26551	6.80176	4.93515	2.77623	0.452876	-1.8973	-4.1351	-6.12798	-7.75791	-8.92834	-9.56996	-9.64475	-9.1483	-8.10999	-6.59134
0.97792	41.2102	51.5907	9.49362				9.49362	9.21131	8.38118	7.05258	5.30455	3.24104	0.984768	-1.33007	-3.5658	-5.58946	-7.2807	-8.53893	-9.28932	-9.48725	-9.12093	-8.21217	-6.815	-5.01251	-2.91192	-0.638145	1.67358	3.88578	5.86687	7.49904	8.68522	9.35486	9.46813	9.01831	8.03213	6.56826	4.71375	2.57889	0.290665	-2.01485	-4.20054	-6.1364	-7.70731	-8.81985	-9.40783	-9.43631	-8.90357	-7.84131	-6.3127
0.97994	41.4045	51.6635	9.46027				9.46027	9.17779	8.34724	7.0182	5.27005	3.20719	0.952793	-1.3585	-3.58866	-5.60452	-7.28569	-8.53177	-9.26835	-9.45144	-9.0701	-8.14712	-6.73761	-4.92575	-2.81972	-0.545309	1.76167	3.96344	5.92853	7.53957	8.70037	9.34159	9.42496	8.94548	7.9318	6.44445	4.57224	2.42699	0.136806	-2.16155	-4.33082	-6.24146	-7.77938	-8.85272	-9.3974	-9.38088	-8.80416	-7.70167	-6.13925
0.98197	41.175	51.5585	9.65463				9.65463	9.36517	8.51412	7.15253	5.36204	3.25002	0.943116	-1.42034	-3.69863	-5.75514	-7.46654	-8.73021	-9.47038	-9.64266	-9.23673	-8.27692	-6.82078	-4.95565	-2.79335	-0.463548	1.89405	4.13807	6.13395	7.76202	8.92464	9.5521	9.60677	9.08537	8.01918	6.47212	4.53696	2.32975	-0.0171695	-2.36306	-4.56724	-6.49756	-8.03825	-9.09693	-9.61012	-9.54704	-8.91148	-7.74155	-6.1074
0.98399	41.0919	50.9079	9.20235				9.20235	8.92531	8.11088	6.80809	5.09538	3.07588	0.87118	-1.38597	-3.55968	-5.51905	-7.14612	-8.34293	-9.0374	-9.18773	-8.78486	-7.85306	-6.44842	-4.65552	-2.58231	-0.353619	1.89636	4.03217	5.92519	7.46146	8.54847	9.12077	9.14392	8.6165	7.57029	6.06826	4.20087	2.08053	-0.165066	-2.40073	-4.49184	-6.3125	-7.75308	-8.72685	-9.17517	-9.07105	-8.42077	-7.26346	-5.66882
0.98601	41.1113	50.7642	9.12402				9.12402	8.84822	8.03748	6.74083	5.03665	3.02798	0.836239	-1.40605	-3.56334	-5.5052	-7.11424	-8.29317	-8.97073	-9.10595	-8.69066	-7.74996	-6.34073	-4.54816	-2.48062	-0.263114	1.9703	4.0846	5.95195	7.45947	8.51602	9.05772	9.05183	8.49869	7.43175	5.91552	4.04165	1.92344	-0.311054	-2.52674	-4.58967	-6.37513	-7.77517	-8.70515	-9.10885	-8.96185	-8.27306	-7.08411	-5.46688
0.98803	40.8408	50.5691	9.27084				9.27084	8.98946	8.16239	6.83983	5.10208	3.05461	0.82172	-1.46105	-3.65513	-5.62734	-7.25794	-8.44797	-9.12518	-9.24846	-8.81033	-7.83739	-6.38869	-4.55218	-2.43934	-0.17842	2.09333	4.238	6.12542	7.64101	8.69276	9.21683	9.18141	8.58866	7.47454	5.9067	3.9803	1.81229	-0.465741	-2.7155	-4.80041	-6.59393	-7.98717	-8.89557	-9.26398	-9.07003	-8.32551	-7.0756	-5.39618
0.99006	40.7968	50.4152	9.24164				9.24164	8.95999	8.13222	6.80878	5.07033	3.02284	0.791097	-1.48886	-3.67807	-5.64309	-7.26416	-8.44247	-9.1062	-9.21489	-8.76192	-7.77489	-6.31397	-4.46821	-2.3501	-0.0887551	2.178	4.31201	6.18319	7.6775	8.70385	9.19969	9.1348	8.51312	7.37256	5.78262	3.84023	1.66377	-0.614101	-2.85454	-4.92099	-6.6875	-8.0464	-8.91485	-9.23993	-9.00183	-8.21504	-6.92754	-5.2178
0.99208	40.9588	50.3093	9.05775				9.05775	8.78058	7.96606	6.66401	4.95413	2.94107	0.748008	-1.49083	-3.63842	-5.56335	-7.14781	-8.29482	-8.9342	-9.02682	-8.56699	-7.58288	-6.1347	-4.31108	-2.22362	-8.13421e-05	2.22346	4.31093	6.13458	7.58279	8.56694	9.0268	8.93423	8.29489	7.14791	5.56348	3.63857	1.49099	-0.747846	-2.94091	-4.954	-6.6639	-7.96598	-8.78054	-9.05775	-8.78062	-7.96613	-6.66412	-4.95427
0.9941	41.1016	50.5297	9.20756				9.20756	8.92467	8.09338	6.76477	5.02049	2.96771	0.732573	-1.54758	-3.73264	-5.68833	-7.2945	-8.45243	-9.09099	-9.17093	-8.68733	-7.66993	-6.18122	-4.3127	-2.17917	0.0882625	2.35027	4.46786	6.31091	7.76618	8.74423	9.18497	9.06132	8.38087	7.18544	5.54849	3.57059	1.37329	-0.908396	-3.13426	-5.16754	-6.88328	-8.17606	-8.96645	-9.20587	-8.87961	-8.00772	-6.64378	-4.8716
0.99612	41.0143	50.4879	9.32745				9.32745	9.03972	8.19427	6.84327	5.07006	2.98405	0.713936	-1.60022	-3.81566	-5.79568	-7.41813	-8.58291	-9.21816	-9.28469	-8.77838	-7.73048	-6.20565	-4.29795	-2.12508	0.178899	2.47184	4.61228	6.46815	7.92497	8.89285	9.31207	9.15678	8.43654	7.19581	5.51112	3.48642	1.24662	-1.07009	-3.32079	-5.3666	-7.08131	-8.35914	-9.12124	-9.32059	-8.9449	-8.01734	-6.59515	-4.76606
0.99815	40.5949	50.1715	9.50591				9.50591	9.21148	8.34643	6.96435	5.15085	3.01828	0.698732	-1.6641	-3.92385	-5.94052	-7.58921	-8.76776	-9.40319	-9.45612	-8.92328	-7.83767	-6.26654	-4.30723	-2.08109	0.273956	2.61204	4.78831	6.66796	8.13456	9.09725	9.49639	9.30727	8.5416	7.2468	5.50309	3.41848	1.12211	-1.24377	-3.53261	-5.60261	-7.32555	-8.5947	-9.33143	-9.49012	-9.06093	-8.07044	-6.58002	-4.68199
1.00017	40.601	49.7336	9.13883				9.13883	8.85463	8.01971	6.68599	4.93642	2.87984	0.644131	-1.63164	-3.80592	-5.74349	-7.32384	-8.44867	-9.04803	-9.08464	-8.55621	-7.49562	-5.96883	-4.07081	-1.91959	0.351014	2.59979	4.68687	6.48244	7.87483	8.77743	9.13412	8.92269	8.15631	6.88264	5.18089	3.15691	0.936583	-1.342	-3.53711	-5.51222	-7.1445	-8.33242	-9.00209	-9.11187	-8.65492	-7.65967	-6.18802	-4.33149
1.00219	41.0499	49.4601	8.48411				8.48411	8.2192	7.44104	6.19822	4.56834	2.65318	0.572338	-1.54424	-3.56439	-5.36195	-6.82468	-7.86124	-8.40689	-8.42755	-7.92195	-6.92165	-5.48912	-3.71382	-1.7066	0.407195	2.49556	4.42808	6.08409	7.36017	8.17663	8.48249	8.25865	7.51909	6.30999	4.70685	2.80979	0.737264	-1.3813	-3.41361	-5.23275	-6.72512	-7.79753	-8.38302	-8.44502	-7.97966	-7.01599	-5.61421	-3.86183
1.00421	41.2131	49.287	8.21076				8.21076	7.95336	7.19731	5.99002	4.40716	2.54799	0.529074	-1.52302	-3.47962	-5.21806	-6.62935	-7.62499	-8.14257	-8.14964	-7.64574	-6.66249	-5.26151	-3.53065	-1.57843	0.472748	2.49429	4.35945	5.95128	7.16999	7.93915	8.21056	7.96719	7.2243	6.02847	4.45467	2.60158	0.585374	-1.46753	-3.42843	-5.17437	-6.5959	-7.60388	-8.13512	-8.15632	-7.66614	-6.69531	-5.30471	-3.58152
1.00624	40.8317	49.4768	8.86289				8.86289	8.58393	7.76462	6.45653	4.74201	2.72898	0.544161	-1.67491	-3.78855	-5.6637	-7.18233	-8.24883	-8.79607	-8.7896	-8.22984	-7.15201	-5.62397	-3.7419	-1.62428	0.595589	2.77796	4.78547	6.49173	7.78934	8.59662	8.86274	8.57096	7.73964	6.42112	4.69839	2.6799	0.492714	-1.72549	-3.83507	-5.70324	-7.2124	-8.26754	-8.80224	-8.78284	-8.21057	-7.12145	-5.58404	-3.69512
1.00826	40.3942	49.4046	9.31181				9.31181	9.01755	8.15338	6.7739	4.9663	2.84483	0.54356	-1.79206	-4.01442	-5.98307	-7.57358	-8.68543	-9.24835	-9.22677	-8.62205	-7.4724	-5.85049	-3.85882	-1.62327	0.714872	3.00783	5.1107	6.89056	8.23493	9.05884	9.31023	8.9732	8.06905	6.65493	4.82022	2.68086	0.372063	-1.96025	-4.16866	-6.11362	-7.67219	-8.74586	-9.26679	-9.20205	-8.55573	-7.36868	-5.71592	-3.7019
1.01028	40.4254	49.2595	9.20298				9.20298	8.911	8.05359	6.68515	4.89252	2.78944	0.509367	-1.80303	-4.00102	-5.94513	-7.512	-8.60222	-9.14659	-9.11059	-8.49648	-7.34325	-5.72407	-3.74167	-1.52186	0.794524	3.06049	5.13226	6.87837	8.18803	8.97813	9.19854	8.83527	7.91137	6.48548	4.64806	2.5157	0.223717	-2.08246	-4.2565	-6.16046	-7.67351	-8.69965	-9.17377	-9.06579	-8.38255	-7.16742	-5.49748	-3.47872
1.01231	40.5634	49.189	9.05822				9.05822	8.76968	7.92246	6.57051	4.79998	2.72365	0.473812	-1.80621	-3.97117	-5.88314	-7.42031	-8.48475	-9.00865	-8.95864	-8.3379	-7.18598	-5.57625	-3.61129	-1.41625	0.869007	3.0989	5.13138	6.83695	8.10696	8.86049	9.04955	8.66209	7.7228	6.2915	4.45939	2.34319	0.0777107	-2.19272	-4.32346	-6.17876	-7.64044	-8.61536	-9.04142	-8.89148	-8.17509	-6.93789	-5.2587	-3.24449
1.01433	40.6861	48.8712	8.66448				8.66448	8.38739	7.57384	6.27587	4.57648	2.58439	0.426997	-1.75771	-3.82999	-5.6573	-7.12277	-8.13267	-8.6224	-8.56064	-7.95134	-6.83346	-5.27852	-3.38597	-1.27684	0.913946	3.04628	4.98377	6.6025	7.79894	8.49655	8.65072	8.25158	7.32468	5.92928	4.15465	2.11429	-0.0613082	-2.23298	-4.26183	-6.0181	-7.38944	-8.28816	-8.65676	-8.47167	-7.74474	-6.52244	-4.88298	-2.93119
1.01635	40.6051	48.5265	8.4523				8.4523	8.18093	7.38422	6.11334	4.44991	2.50072	0.39096	-1.74391	-3.7668	-5.5478	-6.97256	-7.94959	-8.41614	-8.34225	-7.73268	-6.62657	-5.09494	-3.23614	-1.16953	0.97217	3.05145	4.93478	6.50123	7.65021	8.30794	8.43219	8.01497	7.08308	5.69636	3.94386	1.9381	-0.192112	-2.30999	-4.27953	-5.97426	-7.28537	-8.12865	-8.44996	-8.22867	-7.47898	-6.24904	-4.61782	-2.69008
1.01837	40.3878	48.2414	8.44677				8.44677	8.1745	7.37523	6.1005	4.43248	2.47871	0.365136	-1.77197	-3.79485	-5.57307	-6.99202	-7.9602	-8.4152	-8.32769	-7.70332	-6.58232	-5.03698	-3.16691	-1.09268	1.052	3.12885	5.00399	6.55654	7.6864	8.32073	8.41864	7.97382	7.01494	5.60383	3.83144	1.81205	-0.324157	-2.43947	-4.39751	-6.07206	-7.35515	-8.16407	-8.44667	-8.18473	-7.39513	-6.12879	-4.46734	-2.51788
1.0204	40.0808	47.7291	8.29178				8.29178	8.02344	7.2358	5.97982	4.33681	2.4131	0.333209	-1.76825	-3.75526	-5.49922	-6.88724	-7.8295	-8.265	-8.16556	-7.53761	-6.4218	-4.89034	-3.04237	-0.997476	1.11198	3.14946	4.98309	6.4942	7.58498	8.18483	8.25493	7.79074	6.8223	5.41229	3.65198	1.6553	-0.448519	-2.52331	-4.43478	-6.05921	-7.29147	-8.05179	-8.29098	-7.99354	-7.17872	-5.89927	-4.238	-2.30243
1.02242	40.2822	48.0075	8.44181				8.44181	8.16754	7.36255	6.07915	4.40073	2.43636	0.313679	-1.82939	-3.85358	-5.62738	-7.03551	-7.98648	-8.4185	-8.30349	-7.64893	-6.49735	-4.92358	-3.02988	-0.939304	1.21231	3.28515	5.14452	6.66961	7.76131	8.34869	8.39358	7.89307	6.87967	5.41924	3.60667	1.55974	-0.588536	-2.69857	-4.63325	-6.26688	-7.49328	-8.23278	-8.43732	-8.09361	-7.22399	-5.88496	-4.16354	-2.17157
1.02444	40.1746	48.3497	9.00415				9.00415	8.71046	7.84855	6.47464	4.67836	2.57688	0.307309	-1.98231	-4.14262	-6.03268	-7.52921	-8.53457	-8.98318	-8.84577	-8.13132	-6.88642	-5.19229	-3.15945	-0.920495	1.3785	3.58758	5.56262	7.17478	8.3189	8.92034	8.93987	8.37621	7.26612	5.68204	3.72729	1.52939	-0.768275	-3.01582	-5.06664	-6.78693	-8.06448	-8.81595	-8.99231	-8.58207	-7.61197	-6.14531	-4.27777	-2.13116
1.02646	39.9929	48.3582	9.28646				9.28646	8.98237	8.09002	6.66785	4.809	2.6352	0.288821	-2.07647	-4.30578	-6.25309	-7.79089	-8.81845	-9.26849	-9.11153	-8.35785	-7.05681	-5.29361	-3.18373	-0.865346	1.50971	3.7859	5.81414	7.46161	8.62042	9.21467	9.20544	8.59334	7.41846	5.75774	3.71994	1.43852	-0.937109	-3.25137	-5.35269	-7.10347	-8.38903	-9.12519	-9.26373	-8.79559	-7.75142	-6.1996	-4.24176	-2.00613
1.02849	40.2053	48.2317	8.98097				8.98097	8.68573	7.81941	6.43898	4.63519	2.52665	0.251985	-2.03925	-4.19641	-6.07765	-7.55931	-8.54394	-8.96683	-8.80016	-8.05489	-6.78003	-5.05939	-3.0061	-0.755161	1.54543	3.7444	5.69719	7.2754	8.37526	8.92445	8.88688	8.26501	7.09973	5.46765	3.47608	1.25596	-1.04674	-3.28061	-5.29879	-6.96858	-8.18019	-8.85398	-8.94562	-8.4491	-7.39707	-5.85869	-3.93511	-1.7528
1.03051	40.3894	47.9559	8.53302				8.53302	8.25141	7.42515	6.1088	4.38923	2.37994	0.21357	-1.9669	-4.01754	-5.80301	-7.20544	-8.13227	-8.52233	-8.34986	-7.62626	-6.39928	-4.74991	-2.78702	-0.640176	1.54893	3.63579	5.48268	6.96767	7.99276	8.49028	8.4274	7.80826	6.67373	5.0987	3.18712	1.06518	-1.12707	-3.24493	-5.14861	-6.71244	-7.83322	-8.43696	-8.48382	-7.97069	-6.93146	-5.4347	-3.57923	-1.48751
1.03253	40.1221	47.9699	8.9199				8.9199	8.62436	7.75736	6.37632	4.57277	2.46621	0.196234	-2.08675	-4.23145	-6.09577	-7.55616	-8.51585	-8.91126	-8.71618	-7.94354	-6.64453	-4.90523	-2.8409	-0.588321	1.70324	3.88194	5.80341	7.34033	8.39086	8.88538	8.79112	8.11434	6.89987	5.2282	3.21009	0.97927	-1.31644	-3.52492	-5.49983	-7.1103	-8.24962	-8.84229	-8.84904	-8.26943	-7.14186	-5.54105	-3.57307	-1.36832
1.03455	40.1268	47.8199	8.8127				8.8127	8.51958	7.65973	6.29035	4.50252	2.41518	0.167179	-2.09194	-4.21191	-6.05169	-7.48891	-8.42795	-8.80636	-8.59895	-7.81954	-6.51995	-4.78665	-2.73494	-0.501295	1.7657	3.91523	5.80432	7.3073	8.32419	8.78734	8.66594	7.96808	6.74017	5.0639	3.05076	0.83469	-1.43691	-3.61292	-5.5486	-7.11517	-8.20844	-8.75567	-8.72046	-8.10516	-6.95069	-5.33385	-3.36219	-1.16688
1.03658	40.2013	47.5446	8.47814				8.47814	8.19505	7.36469	6.0425	4.31679	2.3028	0.13502	-2.04177	-4.08221	-5.85004	-7.22719	-8.12171	-8.47384	-8.26009	-7.49471	-6.22883	-4.54698	-2.56148	-0.404923	1.77868	3.8435	5.65164	7.08237	8.04012	8.46095	8.31674	7.61713	6.40885	4.77257	2.81757	0.674415	-1.51378	-3.60088	-5.44751	-6.93035	-7.95038	-8.43947	-8.36496	-7.73183	-6.58236	-4.99331	-3.0708	-0.943223
1.0386	39.9707	47.207	8.41996				8.41996	8.13772	7.30993	5.99208	4.27251	2.26652	0.108583	-2.05664	-4.08398	-5.83753	-7.19973	-8.07926	-8.41716	-8.19076	-7.41526	-6.14264	-4.45821	-2.4749	-0.325678	1.84538	3.89272	5.6791	7.08474	8.01543	8.40876	8.23836	7.51566	6.28911	4.64094	2.68164	0.542556	-1.6329	-3.69888	-5.51689	-6.96505	-7.94626	-8.39476	-8.28047	-7.61106	-6.4314	-4.82058	-2.88659	-0.759074
1.04062	39.9021	46.9036	8.21033				8.21033	7.93405	7.12381	5.83415	4.15184	2.19012	0.0810044	-2.03356	-4.01127	-5.71902	-7.04189	-7.89083	-8.20873	-7.97418	-7.20296	-5.947	-4.2908	-2.34583	-0.242982	1.87621	3.86914	5.60168	6.95722	7.84454	8.20393	8.0112	7.27931	6.05753	4.42808	2.50062	0.404865	-1.71813	-3.7255	-5.48215	-6.86984	-7.7952	-8.19594	-8.0451	-7.35282	-6.16571	-4.56364	-2.65443	-0.56659
1.04264	39.8992	46.5908	7.908				7.908	7.64087	6.85752	5.61088	3.98517	2.09022	0.0540613	-1.98575	-3.89141	-5.53417	-6.80304	-7.61229	-7.90726	-7.66802	-6.91073	-5.68655	-4.07819	-2.1943	-0.162174	1.88091	3.79693	5.45642	6.74728	7.58229	7.90505	7.69374	6.96264	5.76115	4.17044	2.29797	0.270256	-1.77572	-3.70173	-5.37765	-6.69026	-7.55087	-7.90135	-7.71802	-7.01326	-5.83468	-4.26191	-2.40121	-0.378287
1.04467	40.1035	46.6662	7.81637				7.81637	7.55131	6.77411	5.53747	3.92528	2.04687	0.0296343	-1.98961	-3.87392	-5.49549	-6.74434	-7.53579	-7.81614	-7.5664	-6.80348	-5.57914	-3.97642	-2.10401	-0.0889013	1.93224	3.82233	5.45318	6.71419	7.51983	7.81547	7.58105	6.83246	5.62049	4.02733	2.16103	0.148163	-1.87475	-3.77052	-5.41056	-6.68365	-7.50345	-7.81435	-7.59526	-6.86106	-5.66152	-4.07801	-2.21793	-0.207416
1.04669	39.8746	46.7887	8.29858				8.29858	8.01608	7.18783	5.87021	4.15293	2.15291	0.00631793	-2.14071	-4.14199	-5.86127	-7.18151	-8.0128	-8.29857	-8.01934	-7.19414	-5.87914	-4.16387	-2.16512	-0.0189538	2.1285	4.13104	5.85232	7.17517	8.00951	8.29854	8.02258	7.20043	5.88805	4.1748	2.17731	0.0315896	-2.11628	-4.12007	-5.84336	-7.16881	-8.00619	-8.29849	-8.0258	-7.2067	-5.89695	-4.18571	-2.1895	-0.0442253
1.04871	39.9351	46.8972	8.42098				8.42098	8.13322	7.28959	5.94777	4.19945	2.16413	-0.0191044	-2.20103	-4.23253	-5.97476	-7.30865	-8.14303	-8.42089	-8.12323	-7.27039	-5.92066	-4.16629	-2.12718	0.0573129	2.23789	4.26552	6.00162	7.32755	8.15269	8.42063	8.11307	7.25104	5.89343	4.13304	2.09019	-0.0955202	-2.2747	-4.29842	-6.02836	-7.34631	-8.16217	-8.4202	-8.10275	-7.23153	-5.86608	-4.09971	-2.05315	0.133726
1.05073	40.1334	47.191	8.6025				8.6025	8.30741	7.44237	6.06675	4.27491	2.18978	-0.0455816	-2.27781	-4.35378	-6.13104	-7.48768	-8.33061	-8.60202	-8.28327	-7.39624	-6.00178	-4.19556	-2.1015	0.13674	2.36559	4.43216	6.19464	7.53214	8.35288	8.60057	8.2582	7.34927	5.93613	4.11574	2.01298	-0.227883	-2.45311	-4.51004	-6.25755	-7.57575	-8.37421	-8.59815	-8.2322	-7.30147	-5.86982	-4.03545	-1.92423	0.319
1.05276	40.1225	46.9135	8.34159				8.34159	8.05434	7.2124	5.87373	4.13055	2.10289	-0.0695987	-2.23729	-4.2509	-5.97175	-7.28133	-8.08944	-8.34043	-8.01701	-7.14146	-5.77408	-4.00904	-1.9679	0.208777	2.37107	4.37007	6.0681	7.34822	8.12227	8.33694	7.97744	7.06854	5.67282	3.88642	1.83236	-0.347896	-2.50419	-4.48802	-6.16277	-7.41308	-8.15285	-8.33114	-7.93566	-6.99365	-5.56998	-3.76272	-1.69631	0.486919
1.05478	39.7871	46.3526	8.12668				8.12668	7.84577	7.02246	5.71366	4.00986	2.02885	-0.0924283	-2.20731	-4.1696	-5.84363	-7.11367	-7.89192	-8.12458	-7.79556	-6.92761	-5.58074	-3.84805	-1.84933	0.277237	2.38464	4.32718	5.97057	7.2012	7.93399	8.11828	7.74132	6.82918	5.44493	3.68424	1.66886	-0.461902	-2.56073	-4.48252	-6.09443	-7.28501	-7.97195	-8.10777	-7.68307	-6.72722	-5.3063	-3.51853	-1.48752	0.646328
1.0568	39.5704	46.1087	8.15526				8.15526	7.87229	7.04301	5.72496	4.00963	2.01604	-0.117462	-2.24281	-4.21251	-5.88988	-7.15851	-7.93037	-8.15188	-7.80768	-6.92166	-5.5553	-3.80342	-1.78759	0.352288	2.46772	4.4119	6.04991	7.26807	7.98186	8.14173	7.7366	6.79457	5.38102	3.59405	1.55766	-0.586821	-2.69058	-4.60762	-6.20491	-7.3716	-8.02673	-8.12483	-7.65909	-6.66184	-5.20228	-3.3817	-1.32644	0.820868
1.05882	39.7261	46.0315	7.92497				7.92497	7.64894	6.84008	5.55474	3.88245	1.93971	-0.138154	-2.20639	-4.12094	-5.74841	-6.97545	-7.71657	-7.92016	-7.57202	-6.69641	-5.35432	-3.63925	-1.67067	0.414295	2.4704	4.35441	5.93509	7.10233	7.77482	7.90571	7.48588	6.54459	5.14739	3.39162	1.39959	-0.689932	-2.7314	-4.58259	-6.11456	-7.22058	-7.82362	-7.88166	-7.39065	-6.38481	-4.9342	-3.13987	-1.12682	0.964731
1.06085	39.7333	45.7852	7.6649				7.6649	7.39691	6.61168	5.36412	3.74147	1.85719	-0.156956	-2.16013	-4.01225	-5.5838	-6.76491	-7.47297	-7.65847	-7.30844	-6.44736	-5.13544	-3.46442	-1.55114	0.470604	2.45944	4.27629	5.79412	6.90679	7.53649	7.63919	7.20771	6.27223	4.89814	3.18155	1.24248	-0.783464	-2.75463	-4.53317	-5.99473	-7.03709	-7.58738	-7.60711	-7.0949	-6.08657	-4.65263	-2.89335	-0.931748	1.09501
1.06287	39.8385	45.6715	7.44413				7.44413	7.18288	6.41744	5.20156	3.62058	1.78546	-0.174986	-2.12315	-3.92228	-5.4461	-6.58766	-7.26681	-7.43591	-7.08306	-6.23304	-4.94552	-3.31087	-1.44382	0.52457	2.45614	4.21531	5.67861	6.74331	7.33469	7.41124	6.96759	6.03487	4.67856	2.99385	1.099	-0.872995	-2.78371	-4.49903	-5.89856	-6.88406	-7.38636	-7.3702	-6.83672	-5.82336	-4.40125	-2.67021	-0.751741	1.21949
1.06489	39.8555	45.6402	7.43881				7.43881	7.17675	6.40905	5.18978	3.60485	1.76594	-0.197393	-2.14682	-3.94499	-5.4652	-6.60036	-7.27048	-7.42834	-7.06282	-6.19968	-4.89973	-3.25456	-1.38009	0.591623	2.52165	4.27401	5.72524	6.77308	7.34372	7.39694	6.92899	5.97285	4.59589	2.89511	0.990349	-0.984187	-2.88938	-4.591	-5.96915	-6.92673	-7.39628	-7.34471	-6.77565	-5.72921	-4.2791	-2.5275	-0.59782	1.37398
1.06692	39.6861	45.5325	7.5755				7.5755	7.30762	6.52291	5.27687	3.65763	1.77971	-0.224079	-2.21202	-4.04352	-5.58904	-6.73929	-7.4129	-7.56225	-7.17676	-6.2837	-4.94623	-3.25895	-1.34117	0.671451	2.63659	4.41526	5.88166	6.93208	7.49225	7.52252	7.02078	6.0225	4.59828	2.84885	0.897942	-1.11647	-3.05193	-4.77154	-6.15369	-7.10062	-7.54537	-7.45648	-6.84023	-5.74022	-4.23424	-2.42879	-0.451568	1.55759
1.06894	39.7165	45.5737	7.64719				7.64719	7.37575	6.5807	5.31849	3.67871	1.77778	-0.249359	-2.25879	-4.10788	-5.66534	-6.82061	-7.49169	-7.63093	-7.22844	-6.3128	-4.94902	-3.2339	-1.2892	0.747016	2.7302	4.51957	5.98809	7.03151	7.57577	7.58221	7.05039	6.01806	4.5585	2.77533	0.795142	-1.2415	-3.19	-4.91204	-6.28538	-7.21251	-7.62762	-7.50125	-6.84235	-5.69771	-4.14859	-2.30496	-0.297701	1.7307
1.07096	39.6482	45.6453	7.88918				7.88918	7.6081	6.78489	5.4782	3.78114	1.81466	-0.28114	-2.3569	-4.26472	-5.86864	-7.05438	-7.73744	-7.86915	-7.44012	-6.48093	-5.05993	-3.27836	-1.26319	0.841992	2.88718	4.72663	6.22927	7.28803	7.82747	7.80914	7.23435	6.14405	4.61595	2.75893	0.70531	-1.39857	-3.40278	-5.16453	-6.55826	-7.48467	-7.87774	-7.70946	-6.99182	-5.77597	-4.14853	-2.22548	-0.143846	1.94804
1.07298	39.5172	45.61	8.07575				8.07575	7.78694	6.94117	5.59893	3.85623	1.83772	-0.312241	-2.43987	-4.39298	-6.03189	-7.23936	-7.92905	-8.0516	-7.59827	-6.60147	-5.1325	-3.29643	-1.22458	0.934856	3.02743	4.90346	6.42877	7.49427	8.02374	7.97931	7.36416	6.22229	4.63537	2.71691	0.60412	-1.55188	-3.59688	-5.38462	-6.78722	-7.70436	-8.07046	-7.85931	-7.08602	-5.80591	-4.11053	-2.12115	0.0199528	2.15963
1.07501	39.3125	45.4478	8.19384				8.19384	7.8997	7.03841	5.67181	3.898	1.84434	-0.341737	-2.50328	-4.4851	-6.14491	-7.36356	-8.05354	-8.16533	-7.69089	-6.6643	-5.15924	-3.28378	-1.17257	1.02283	3.1448	5.04099	6.57526	7.63747	8.15135	8.08001	7.42858	6.24381	4.61078	2.64672	0.492637	-1.69681	-3.76444	-5.5618	-6.95986	-7.85824	-8.19244	-7.93848	-7.11457	-5.77988	-4.03023	-1.99124	0.190721	2.35899
1.07703	39.5792	45.3007	7.69879				7.69879	7.42139	6.60919	5.32071	3.64881	1.71396	-0.344396	-2.37794	-4.24012	-5.79674	-6.93564	-7.57474	-7.66798	-7.20865	-6.22984	-4.80209	-3.0283	-1.03627	1.03043	3.02288	4.79749	6.22638	7.20658	7.66745	7.57579	6.9382	5.80062	4.24503	2.38354	0.350283	-1.70822	-3.64362	-5.31645	-6.60617	-7.41983	-7.69879	-7.42296	-6.61221	-5.32497	-3.654	-1.71971	0.338508	2.37233
1.07905	39.5284	45.0554	7.4931				7.4931	7.2221	6.42872	5.17034	3.53798	1.64972	-0.357874	-2.33958	-4.15206	-5.66422	-6.76667	-7.37968	-7.45891	-6.99862	-6.03211	-4.62929	-2.89163	-0.944804	1.07036	3.0081	4.72826	6.10641	7.04288	7.46993	7.35667	6.71129	5.58046	4.046	2.21888	0.231269	-1.77307	-3.64917	-5.26131	-6.49289	-7.25483	-7.49202	-7.1873	-6.36271	-5.0779	-3.42579	-1.52589	0.484377	2.45961
1.08107	39.2141	44.6138	7.37535				7.37535	7.10762	6.32387	5.081	3.46925	1.60562	-0.37457	-2.32757	-4.11159	-5.5971	-6.67625	-7.27071	-7.3373	-6.8712	-5.90624	-4.51248	-2.79112	-0.867112	1.11985	3.0255	4.71151	6.05545	6.95976	7.35878	7.22355	6.56389	5.42768	3.89741	2.08419	0.119653	-1.85357	-3.69222	-5.26281	-6.45132	-7.17146	-7.37094	-7.03528	-6.18886	-4.89311	-3.24213	-1.35576	0.629039	2.56817
1.0831	38.9187	45.0115	8.38474				8.38474	8.07923	7.18498	5.76713	3.92902	1.8046	-0.451331	-2.67437	-4.70252	-6.38799	-7.60796	-8.27351	-8.33615	-7.79132	-6.67872	-5.07943	-3.10999	-0.913912	1.34876	3.51315	5.42152	6.93482	7.94276	8.3719	8.19095	7.41312	6.09507	4.33286	2.25491	0.0126327	-2.23056	-4.31121	-6.07769	-7.40128	-8.18552	-8.37326	-7.95082	-6.94899	-5.44077	-3.53607	-1.37369	0.888793	3.08651
1.08512	39.2392	44.7927	7.69981				7.69981	7.41822	6.59404	5.28755	3.59432	1.63819	-0.437757	-2.48169	-4.34411	-5.88878	-7.00274	-7.60449	-7.65004	-7.13604	-6.10009	-4.61797	-2.79807	-0.773517	1.30761	3.2931	5.03772	6.41387	7.32089	7.69245	7.50135	6.76159	5.52727	3.88867	1.96564	-0.10116	-2.16056	-4.06193	-5.66621	-6.85604	-7.5444	-7.68094	-7.25569	-6.29973	-4.88299	-3.1091	-1.1078	0.97453	2.98558
1.08714	39.6497	44.7634	7.14298				7.14298	6.88079	6.11345	4.8973	3.32163	1.5021	-0.427706	-2.32611	-4.05375	-5.48378	-6.51123	-7.06067	-7.09176	-6.60222	-5.62799	-4.24059	-2.54187	-0.656541	1.27699	3.11676	4.72773	5.99162	6.81564	7.1393	6.93884	6.22897	5.06182	3.52306	1.72566	-0.198431	-2.10795	-3.86272	-5.33391	-6.41352	-7.02229	-7.11553	-6.6864	-5.76639	-4.42305	-2.755	-0.884697	1.05056	2.90868
1.08916	39.4831	44.846	7.54692				7.54692	7.26887	6.45522	5.16591	3.49596	1.5684	-0.474717	-2.48286	-4.30805	-5.81581	-6.89503	-7.46618	-7.4872	-6.95652	-5.91325	-4.43426	-2.62854	-0.629127	1.41664	3.35802	5.05196	6.37366	7.22571	7.54533	7.30898	6.53406	5.27769	3.63243	1.71951	-0.320107	-2.33614	-4.18003	-5.71592	-6.83063	-7.44203	-7.50506	-7.01508	-6.0082	-4.5586	-2.77311	-0.783272	1.26428	3.21867
1.09119	39.5713	44.8441	7.47546				7.47546	7.19902	6.39016	5.1087	3.4494	1.53499	-0.492938	-2.48441	-4.29215	-5.78244	-6.84507	-7.40146	-7.41045	-6.87138	-5.82411	-4.3461	-2.54666	-0.558878	1.47024	3.39062	5.06024	6.35561	7.18093	7.47517	7.21655	6.42421	5.15675	3.50791	1.59963	-0.426959	-2.42197	-4.23786	-5.74032	-6.81824	-7.39189	-7.41886	-6.89714	-5.86532	-4.39971	-2.60871	-0.624774	1.40537	3.33158
1.09321	39.5746	44.386	6.87199				6.87199	6.61693	5.8707	4.68868	3.15862	1.39409	-0.473919	-2.30675	-3.96835	-5.33538	-6.30636	-6.80921	-6.80662	-6.29877	-5.32335	-3.95278	-2.2888	-0.454912	1.41274	3.17552	4.70259	5.88058	6.62205	6.87196	6.61176	5.86077	4.67473	3.14169	1.37543	-0.492922	-2.32469	-3.98389	-5.34736	-6.3139	-6.81176	-6.80397	-6.29112	-5.31128	-3.93718	-2.27082	-0.435902	1.43138	3.19241
1.09523	39.3374	44.1812	6.96952				6.96952	6.7099	5.95036	4.7475	3.19094	1.39664	-0.501711	-2.36268	-4.04763	-5.43101	-6.40977	-6.91097	-6.89729	-6.36973	-5.36761	-3.96559	-2.26811	-0.40165	1.49473	3.27975	4.82042	6.00195	6.73631	6.9688	6.68209	5.89754	4.6736	3.10147	1.29826	-0.601667	-2.45677	-4.12884	-5.49329	-6.44848	-6.92323	-6.88218	-6.32838	-5.3031	-3.88272	-2.17306	-0.301507	1.59251	3.36788
1.09725	39.0363	44.1357	7.39161				7.39161	7.11525	6.30683	5.02681	3.37091	1.46293	-0.554431	-2.53034	-4.31704	-5.78092	-6.81252	-7.33471	-7.30843	-6.73566	-5.65921	-4.15958	-2.34892	-0.362608	1.65082	3.5408	5.16601	6.40492	7.1649	7.38911	7.06078	6.20448	4.88422	3.19874	1.27407	-0.745878	-2.71005	-4.47157	-5.89872	-6.88479	-7.35603	-7.27721	-6.65423	-5.53367	-3.99932	-2.16591	-0.170541	1.83758	3.70829
1.09928	39.1834	44.2751	7.43523				7.43523	7.15622	6.34011	5.04818	3.37736	1.45307	-0.580277	-2.57007	-4.36698	-5.83614	-6.86728	-7.38302	-7.34466	-6.75506	-5.65848	-4.13722	-2.30546	-0.300665	1.72669	3.62446	5.2502	6.48191	7.22714	7.42995	7.07514	6.18932	4.83898	3.12547	1.17739	-0.859065	-2.83104	-4.59054	-6.00551	-6.96976	-7.41091	-7.29586	-6.63325	-5.47279	-3.90159	-2.03757	-0.0206274	1.99786	3.86641
1.1013	39.5562	44.2061	6.84014				6.84014	6.58252	5.82907	4.63653	3.09474	1.31983	-0.554494	-2.38705	-4.0398	-5.38824	-6.33081	-6.79651	-6.75024	-6.19551	-5.1741	-3.76293	-2.06833	-0.217917	1.64891	3.39152	4.87867	5.99832	6.66615	6.83184	6.48291	5.64565	4.38312	2.79043	0.987548	-0.889723	-2.69997	-4.30685	-5.5893	-6.45073	-6.82626	-6.68759	-6.04516	-4.94738	-3.47693	-1.74458	0.119188	1.97398	3.68007
1.10332	39.2663	44.0221	7.04741				7.04741	6.78101	6.00197	4.76916	3.17581	1.34236	-0.592576	-2.48271	-4.18515	-5.57119	-6.53604	-7.00676	-6.94776	-6.3635	-5.29816	-3.83227	-2.07665	-0.164042	1.76097	3.55285	5.07613	6.21565	6.88527	7.03434	6.65162	5.76602	4.44451	2.78699	0.918767	-1.01891	-2.87956	-4.52252	-5.82356	-6.68434	-7.03977	-6.86299	-6.16737	-5.00548	-3.46517	-1.66289	0.265101	2.17305	3.91672
1.10534	39.0316	44.0917	7.55339				7.55339	7.26683	6.42888	5.10314	3.39019	1.42001	-0.657924	-2.68593	-4.51014	-5.99214	-7.01948	-7.5142	-7.43877	-6.79892	-5.64319	-4.05927	-2.16735	-0.110985	1.95381	3.87035	5.49322	6.69929	7.39704	7.53353	7.09841	6.12468	4.68623	2.89221	0.878743	-1.2014	-3.19039	-4.93731	-6.30959	-7.20313	-7.55013	-7.32424	-6.54262	-5.26457	-3.58706	-1.63738	0.436537	2.47733	4.33016
1.10737	39.159	43.8993	7.12804				7.12804	6.85663	6.06306	4.80777	3.18635	1.32227	-0.642495	-2.55834	-4.27935	-5.67448	-6.63747	-7.095	-7.01222	-6.39543	-5.29161	-3.78482	-1.98979	-0.0432419	1.9066	3.71126	5.23328	6.35678	6.99618	7.1028	6.66851	5.7264	4.3482	2.63887	0.728578	-1.2372	-3.10875	-4.74357	-6.01714	-6.83249	-7.12752	-6.87976	-6.10809	-4.87126	-3.26347	-1.40716	0.556317	2.47743	4.20987
1.10939	39.2766	43.5233	6.43271				6.43271	6.18688	5.46819	4.33157	2.86389	1.17732	-0.599229	-2.32998	-3.88265	-5.13857	-6.00176	-6.40622	-6.32107	-5.75279	-4.74483	-3.37422	-1.74572	0.0162009	1.77689	3.40176	4.76665	5.76721	6.327	6.40321	5.99002	5.11902	3.85677	2.29975	0.56696	-1.20916	-2.89287	-4.35547	-5.48519	-6.19567	-6.43262	-6.17793	-5.45106	-4.30756	-2.83484	-1.14545	0.631482	2.36015	3.90844
1.11141	39.1621	43.3189	6.34239				6.34239	6.09914	5.38805	4.26365	2.81221	1.14505	-0.609947	-2.31815	-3.84854	-5.08372	-5.92894	-6.31938	-6.22508	-5.65327	-4.64782	-3.28585	-1.67183	0.0704214	1.80728	3.4055	4.7425	5.71572	6.2505	6.30583	5.87747	4.99826	3.73565	2.18649	0.469615	-1.28328	-2.93775	-4.36686	-5.46101	-6.13627	-6.34083	-6.05901	-5.31242	-4.15834	-2.68528	-1.00624	0.749978	2.44867	3.95953
1.11343	38.9684	43.3699	6.76479				6.76479	6.5044	5.74328	4.54001	2.98724	1.2045	-0.670968	-2.49478	-4.12654	-5.44062	-6.33586	-6.74334	-6.63169	-6.00951	-4.92469	-3.46075	-1.73039	0.13318	1.9865	3.68689	5.10345	6.12713	6.67912	6.71692	6.23763	5.27814	3.91232	2.24531	0.405452	-1.46562	-3.22386	-4.73392	-5.87954	-6.57253	-6.75955	-6.42618	-5.59811	-4.33907	-2.74599	-0.941513	0.935443	2.74039	4.33436
1.11546	39.0553	43.0338	6.15929				6.15929	5.92135	5.22591	4.12669	2.70864	1.08131	-0.629571	-2.29181	-3.77697	-4.97031	-5.77963	-6.1424	-6.03059	-5.45284	-4.45378	-3.11061	-1.52711	0.174383	1.8624	3.40653	4.68745	5.60621	6.09182	6.10675	5.64986	4.75644	3.49553	1.96454	0.281761	-1.42279	-3.0174	-4.37889	-5.40204	-6.00782	-6.14942	-5.81589	-5.03301	-3.86127	-2.39119	-0.73636	0.975363	2.61173	4.0463
1.11748	39.0538	42.4558	5.30516				5.30516	5.09948	4.49837	3.54846	2.32339	0.918166	-0.558254	-1.99139	-3.2701	-4.29525	-4.98734	-5.29271	-5.18767	-4.68037	-3.81015	-2.64449	-1.27377	0.195721	1.65004	2.9764	4.07198	4.85181	5.25542	5.25152	4.84041	4.05397	2.95318	1.62339	0.16773	-1.30094	-2.66873	-3.82959	-4.6935	-5.19346	-5.29072	-4.97773	-4.27876	-3.248	-1.9654	-0.530394	0.945739	2.34854	3.56923
1.1195	38.989	42.7899	5.97009				5.97009	5.73779	5.05898	3.98648	2.60375	1.0184	-0.646209	-2.26053	-3.69893	-4.84948	-5.62264	-5.95825	-5.83019	-5.24843	-4.25823	-2.93665	-1.38654	0.271462	1.90834	3.39672	4.62076	5.48521	5.92281	5.89949	5.41707	4.5131	3.25791	1.7492	0.104362	-1.5486	-3.08104	-4.37372	-5.32604	-5.86388	-5.9454	-5.56424	-4.75008	-3.56626	-2.10492	-0.479771	1.18271	2.75316	4.10935
1.12153	39.3201	42.9697	5.77424				5.77424	5.54875	4.88991	3.84915	2.50778	0.970547	-0.642487	-2.20534	-3.59596	-4.70573	-5.44798	-5.76473	-5.63126	-5.05799	-4.08968	-2.80196	-1.29541	0.312312	1.89564	3.33092	4.50606	5.32926	5.73625	5.69523	5.20942	4.31674	3.08692	1.61601	0.0188912	-1.5797	-3.05492	-4.29155	-5.19301	-5.68888	-5.74046	-5.34369	-4.52959	-3.36171	-1.93129	-0.350032	1.25856	2.76887	4.06292
1.12355	39.3502	43.0543	5.90266				5.90266	5.67133	4.99548	3.92809	2.55281	0.977436	-0.674547	-2.27366	-3.69456	-4.82588	-5.57895	-5.89473	-5.74849	-5.15167	-4.15107	-2.8251	-1.2777	0.369845	1.9884	3.45111	4.64331	5.47158	5.87097	5.8102	5.29402	4.3629	3.08981	1.57453	-0.064151	-1.69781	-3.19839	-4.44828	-5.34951	-5.83145	-5.85631	-5.42216	-4.56301	-3.34621	-1.86714	-0.241716	1.40265	2.93708	4.2413
1.12557	39.1182	43.1853	6.52792				6.52792	6.27118	5.52114	4.3368	2.81133	1.06472	-0.765647	-2.53578	-4.10646	-5.35411	-6.18061	-6.52093	-6.34832	-5.67634	-4.55786	-3.08085	-1.36151	0.464939	2.25481	3.86732	5.17562	6.0768	6.49998	6.41187	5.81939	4.76916	3.34378	1.65538	-0.163236	-1.96901	-3.6199	-4.98605	-5.95999	-6.46512	-6.46169	-5.94999	-4.97025	-3.59955	-1.94571	-0.138817	1.67899	3.36474	4.7858
1.12759	39.0474	42.9401	6.29302				6.29302	6.04463	5.31907	4.17361	2.69869	1.01072	-0.757029	-2.46502	-3.97842	-5.17776	-5.96836	-6.2878	-6.11088	-5.45156	-4.36189	-2.92788	-1.26274	0.50208	2.22727	3.77663	5.02786	5.88219	6.27216	6.16701	5.57502	4.54293	3.15222	1.51267	-0.246299	-1.98582	-3.56858	-4.86963	-5.78626	-6.24612	-6.2129	-5.68923	-4.71644	-3.37133	-1.76008	-0.00989129	1.74108	3.35461	4.70332
1.12962	39.1216	42.9932	6.3041				6.3041	6.05439	5.32502	4.17378	2.69187	0.996711	-0.777415	-2.48995	-4.00522	-5.20319	-5.98893	-6.30021	-6.11236	-5.44027	-4.33718	-2.89047	-1.21478	0.55716	2.28496	3.83173	5.07494	5.91609	6.28854	6.1628	5.54881	4.49522	3.0855	1.43134	-0.336217	-2.07714	-3.6535	-4.94042	-5.83594	-6.26911	-6.20562	-5.65049	-4.64771	-3.27672	-1.64614	0.114859	1.86676	3.47077	4.7998
1.13164	38.9341	42.9089	6.51861				6.51861	6.25948	5.50268	4.30839	2.77156	1.01437	-0.823465	-2.59583	-4.16181	-5.39691	-6.20292	-6.51576	-6.31056	-5.60364	-4.4512	-2.94486	-1.20439	0.63184	2.41783	4.01159	5.28641	6.14093	6.5072	6.35612	5.69969	4.59011	3.11558	1.39335	-0.439661	-2.23772	-3.85786	-5.17129	-6.07356	-6.49296	-6.39612	-5.79076	-4.725	-3.28358	-1.58109	0.247099	2.05565	3.70076	5.05164
1.13366	38.7807	42.8863	6.78127				6.78127	6.51074	5.72073	4.47428	2.87083	1.03833	-0.877024	-2.7224	-4.35056	-5.6316	-6.4633	-6.77931	-6.55442	-5.80656	-4.59541	-3.0176	-1.19903	0.715217	2.5724	4.22433	5.53921	6.41213	6.77344	6.59431	5.88904	4.71389	3.16263	1.35904	-0.552997	-2.42091	-4.09566	-5.44363	-6.35726	-6.76366	-6.6304	-5.96812	-4.82965	-3.30584	-1.51826	0.390458	2.26802	3.96463	5.3449
1.13568	38.7808	42.8841	6.82594				6.82594	6.55266	5.75471	4.49597	2.87724	1.02813	-0.903306	-2.76241	-4.40033	-5.68592	-6.51622	-6.82478	-6.58686	-5.82154	-4.59008	-2.99109	-1.1526	0.778175	2.64664	4.30319	5.61518	6.47756	6.82128	6.61882	5.88638	4.68262	3.10391	1.27668	-0.652778	-2.52997	-4.20458	-5.54253	-6.43669	-6.81546	-6.64851	-5.94921	-4.77356	-3.21568	-1.40032	0.527159	2.41243	4.10454	5.46799
1.13771	38.9669	43.018	6.78744				6.78744	6.51473	5.71854	4.46283	2.84851	1.0053	-0.918693	-2.76886	-4.39654	-5.67094	-6.48964	-6.78687	-6.53874	-5.76519	-4.52838	-2.92769	-1.09174	0.831933	2.68876	4.32952	5.62239	6.46347	6.78518	6.56166	5.81088	4.59317	3.00637	1.178	-0.745035	-2.6082	-4.26178	-5.57291	-6.43623	-6.78236	-6.5835	-5.85561	-4.6572	-3.08456	-1.26406	0.658013	2.52721	4.19334	5.52251
1.13973	38.8993	42.8019	6.58523				6.58523	6.31972	5.54459	4.32236	2.75157	0.958903	-0.911089	-2.70761	-4.2858	-5.51838	-6.30597	-6.58505	-6.33312	-5.5705	-4.35868	-2.79538	-1.00667	0.863226	2.66351	4.24901	5.49187	6.29188	6.58452	6.34619	5.59611	4.39477	2.83904	1.05437	-0.815316	-2.61926	-4.21199	-5.46507	-6.27746	-6.58363	-6.35892	-5.62142	-4.43063	-2.88255	-1.10203	0.767363	2.57487	4.17475	5.43798
1.14175	38.6581	42.4691	6.47621				6.47621	6.21417	5.44927	4.24339	2.69413	0.926847	-0.915436	-2.68364	-4.23467	-5.44303	-6.21091	-6.4762	-6.21741	-5.45549	-4.25209	-2.70461	-0.938256	0.904021	2.67314	4.22594	5.43677	6.20764	6.47617	6.22062	5.46169	4.26078	2.71508	0.949661	-0.892604	-2.66264	-4.2172	-5.4305	-6.20434	-6.47612	-6.22382	-5.46788	-4.26946	-2.72554	-0.961064	0.881184	2.65212	4.20845	5.42421
1.14377	38.7709	42.3955	6.20332				6.20332	5.95145	5.21627	4.05748	2.56921	0.872288	-0.895466	-2.5905	-4.07517	-5.2289	-5.95801	-6.20328	-5.9448	-5.20355	-4.03974	-2.54787	-0.849098	0.918631	2.61176	4.09279	5.24146	5.96449	6.20315	5.93807	5.19077	4.02194	2.52651	0.825896	-0.941783	-2.63298	-4.11036	-5.25395	-5.97088	-6.20293	-5.93125	-5.17791	-4.00409	-2.5051	-0.802682	0.964921	2.65417	4.12787	5.26636
1.1458	38.7443	42.476	6.43204				6.43204	6.16996	5.40506	4.19967	2.65204	0.888288	-0.947858	-2.70676	-4.24508	-5.43744	-6.18669	-6.43176	-6.15268	-5.37219	-4.1539	-2.5971	-0.82864	1.00735	2.76124	4.29011	5.46936	6.20289	6.43092	6.13487	5.33886	4.10777	2.54192	0.768919	-1.06674	-2.81548	-4.33476	-5.50079	-6.21854	-6.42951	-6.11652	-5.30506	-4.06128	-2.48652	-0.709131	1.12605	2.86947	4.37904	5.53174
1.14782	38.5801	42.1641	6.22109				6.22109	5.96671	5.22438	4.0548	2.55361	0.843595	-0.935412	-2.63792	-4.1247	-5.27416	-5.99231	-6.2204	-5.9398	-5.17343	-3.98399	-2.46874	-0.75159	1.02702	2.72164	4.19369	5.32278	6.01657	6.21833	5.91155	5.12134	3.9123	2.38331	0.659418	-1.1184	-2.80476	-4.26174	-5.3702	-6.03949	-6.21487	-5.882	-5.0681	-3.83973	-2.29736	-0.5671	1.20953	2.88725	4.32885	5.41644
1.14984	38.4218	42.1398	6.49917				6.49917	6.23249	5.45434	4.22857	2.65578	0.865041	-0.996687	-2.77662	-4.32869	-5.52552	-6.2689	-6.49781	-6.19347	-5.38087	-4.12667	-2.53382	-0.733031	1.12792	2.8963	4.427	5.59439	6.30268	6.49373	6.15186	5.30514	4.02305	2.41081	0.600715	-1.25867	-3.01477	-4.52345	-5.66092	-6.33381	-6.48692	-6.10767	-5.2272	-3.91774	-2.28678	-0.468147	1.3889	3.13197	4.61801	5.72507
1.15186	38.3449	41.9967	6.42837				6.42837	6.16368	5.39139	4.1751	2.61499	0.839527	-1.00507	-2.7669	-4.30087	-5.48066	-6.20909	-6.4262	-6.11409	-5.29847	-4.04651	-2.46131	-0.673413	1.16994	2.91694	4.42373	5.56621	6.2503	6.41967	6.06036	5.20196	3.91517	2.30596	0.506843	-1.33401	-3.06501	-4.54359	-5.648	-6.28728	-6.40879	-6.00252	-5.10193	-3.78118	-2.14905	-0.33993	1.49718	3.211	4.66038	5.72596
1.15389	38.2253	41.4913	5.78994				5.78994	5.55069	4.85274	3.75375	2.34454	0.741581	-0.922663	-2.51066	-3.89117	-4.95011	-5.59997	-5.78705	-5.49587	-4.75052	-3.61257	-2.17608	-0.559758	1.10282	2.67427	4.02471	5.04254	5.64366	5.77837	5.43556	4.64355	3.46779	2.00545	0.377376	-1.28188	-2.83521	-4.15423	-5.12994	-5.6817	-5.76393	-5.36982	-4.53194	-3.31954	-1.83281	-0.194617	1.45966	2.99331	4.2796	5.21221
1.15591	38.2135	41.4387	5.75777				5.75777	5.51903	4.8226	3.72624	2.32087	0.72304	-0.934756	-2.51503	-3.88674	-4.93613	-5.57617	-5.75379	-5.45426	-4.70241	-3.5606	-2.12351	-0.510325	1.14518	2.70572	4.04188	5.04285	5.62562	5.74187	5.38196	4.57573	3.39004	1.92322	0.296906	-1.35403	-2.89267	-4.19143	-5.1426	-5.6673	-5.72203	-5.30223	-4.44273	-3.2148	-1.72027	-0.0830776	1.561	3.07563	4.3352	5.23525
1.15793	38.1843	41.3902	5.7635				5.7635	5.52369	4.82422	3.72329	2.31252	0.709319	-0.952913	-2.53585	-3.90776	-4.95448	-5.5889	-5.75824	-5.44839	-4.68515	-3.53203	-2.08498	-0.464431	1.19477	2.75454	4.0851	5.0757	5.64392	5.74248	5.36316	4.53754	3.33433	1.85364	0.218696	-1.43444	-2.96822	-4.25498	-5.18766	-5.68865	-5.71624	-5.26815	-4.38166	-3.13054	-1.61891	0.0274382	1.6715	3.17647	4.41711	5.29016
1.15995	38.3149	41.6082	5.96181				5.96181	5.71289	4.98691	3.8445	2.38106	0.718784	-1.00351	-2.64201	-4.05989	-5.13874	-5.78849	-5.95486	-5.62398	-4.82346	-3.62016	-2.11456	-0.432381	1.2859	2.89681	4.26581	5.2786	5.8506	5.93405	5.52197	4.64877	3.38739	1.84313	0.144972	-1.5653	-3.14486	-4.4618	-5.40617	-5.89909	-5.89941	-5.40709	-4.46326	-3.14672	-1.56742	0.142776	1.84105	3.38558	4.6474	5.52114
1.16198	38.4567	41.5606	5.65849				5.65849	5.42142	4.73005	3.64232	2.24938	0.66796	-0.969438	-2.5256	-3.87013	-4.89036	-5.5008	-5.65029	-5.32632	-4.55602	-3.40395	-1.96665	-0.364545	1.2681	2.79449	4.08672	5.03649	5.56423	5.62571	5.21578	4.36879	3.15572	1.67821	0.060073	-1.5631	-3.05528	-4.29145	-5.16802	-5.61152	-5.58481	-5.09011	-4.16889	-2.89833	-1.3849	0.244573	1.85355	3.30722	4.48375	5.28456
1.164	38.3791	41.4795	5.69148				5.69148	5.4522	4.75447	3.65695	2.25194	0.657581	-0.992075	-2.55831	-3.90943	-4.93183	-5.53953	-5.68144	-5.34563	-4.56033	-3.39157	-1.93763	-0.320767	1.32307	2.85565	4.14812	5.09179	5.60732	5.65136	5.2202	4.3501	3.11422	1.61648	-0.017179	-1.64939	-3.14292	-4.37217	-5.23379	-5.65533	-5.60133	-5.07635	-4.12452	-2.82588	-1.28963	0.355064	1.9699	3.4191	4.5808	5.35733
1.16602	38.5504	41.7066	5.83426				5.83426	5.58813	4.87049	3.74191	2.29761	0.659442	-1.03436	-2.6409	-4.0246	-5.06873	-5.68519	-5.82195	-5.46749	-4.65171	-3.44344	-1.94463	-0.281738	1.40492	2.97304	4.29031	5.24559	5.75826	5.78509	5.32379	4.4133	3.13044	1.58344	-0.0971556	-1.76956	-3.29265	-4.53793	-5.40031	-5.80705	-5.72381	-5.15763	-4.15627	-2.80423	-1.21558	0.475639	2.12672	3.59836	4.76639	5.53226
1.16804	38.485	41.8183	6.20446				6.20446	5.94181	5.17609	3.97213	2.43187	0.685717	-1.11849	-2.82801	-4.29809	-5.40427	-6.05289	-6.18904	-5.80119	-4.92218	-3.62643	-2.02365	-0.249532	1.54571	3.21009	4.60268	5.60558	6.13388	6.14286	5.63174	4.64381	3.26271	1.60537	-0.187894	-1.96525	-3.57621	-4.88439	-5.77903	-6.18439	-6.06614	-5.4343	-4.34235	-2.88276	-1.1791	0.624386	2.37501	3.92456	5.14183	5.92376
1.17007	38.2658	41.7767	6.58068				6.58068	6.30114	5.48627	4.20529	2.56704	0.710699	-1.20602	-3.02028	-4.57794	-5.74667	-6.42717	-6.56163	-6.13863	-5.1941	-3.80829	-2.09894	-0.211263	1.69436	3.45604	4.9241	5.97381	6.516	6.50461	5.94059	4.87188	3.38926	1.61869	-0.289396	-2.1729	-3.87179	-5.24175	-6.16637	-6.56712	-6.40993	-5.70817	-4.52145	-2.9506	-1.12907	0.78838	2.63885	4.26513	5.52906	6.32324
1.17209	38.2446	41.5675	6.27137				6.27137	6.00405	5.2249	4.00032	2.43471	0.661549	-1.16801	-2.898	-4.38093	-5.49039	-6.1318	-6.25047	-5.8363	-4.92458	-3.59304	-1.9552	-0.15068	1.66669	3.34197	4.73235	5.7193	6.21868	6.18793	5.62965	4.59145	3.16183	1.46266	-0.361193	-2.15426	-3.76367	-5.05224	-5.9101	-6.26413	-6.08414	-5.38549	-4.22772	-2.70954	-0.960378	0.870659	2.62747	4.1603	5.33846	6.06151
1.17411	38.1493	41.189	5.77659				5.77659	5.52952	4.80945	3.67797	2.23187	0.59485	-1.09305	-2.68745	-4.05196	-5.06986	-5.65408	-5.75464	-5.36293	-4.51248	-3.27602	-1.75932	-0.0921268	1.58295	3.12261	4.39516	5.29175	5.73566	5.68894	5.15558	4.18121	2.84916	1.2734	-0.411297	-2.06081	-3.53403	-4.70495	-5.4734	-5.77365	-5.58001	-4.90905	-3.81816	-2.40066	-0.777798	0.911594	2.52301	3.9186	4.97899	5.61346
1.17613	38.34	41.1978	5.46829				5.46829	5.23361	4.5497	3.47528	2.10256	0.549367	-1.05098	-2.56112	-3.85142	-4.81115	-5.35791	-5.44478	-5.0643	-4.24914	-3.06925	-1.62592	-0.0430294	1.54356	2.99765	4.19445	5.03121	5.43613	5.37445	4.85145	3.91204	2.63683	1.1353	-0.463678	-2.02286	-3.40841	-4.5014	-5.20802	-5.46761	-5.2579	-4.59688	-3.54129	-2.18174	-0.634919	0.966398	2.48477	3.78986	4.76965	5.34004
1.17816	38.4499	41.0775	5.06261				5.06261	4.8446	4.20932	3.2115	1.93708	0.495828	-0.988134	-2.38699	-3.58026	-4.46516	-4.96549	-5.03815	-4.67688	-3.9128	-2.81171	-1.46846	0.00127082	1.47089	2.81383	3.91441	4.67785	5.0384	4.96499	4.46396	3.57846	2.38475	0.985641	-0.498357	-1.93943	-3.21347	-4.21073	-4.84533	-5.06261	-4.84386	-4.20791	-3.20954	-1.93474	-0.493298	0.990627	2.38923	3.58205	4.46636	4.96599
1.18018	38.4268	41.0219	5.03422				5.03422	4.81668	4.18288	3.18759	1.91682	0.480395	-0.997548	-2.38928	-3.57453	-4.45086	-4.94253	-5.00707	-4.63888	-3.8698	-2.76627	-1.42369	0.0419397	1.50394	2.83597	3.92291	4.67082	5.01507	4.92591	4.41105	3.51497	2.31512	0.915196	-0.563822	-1.99411	-3.25207	-4.22898	-4.84041	-5.03352	-4.79163	-4.13563	-3.12223	-1.839	-0.396834	1.07962	2.46278	3.63309	4.48943	4.95778
1.1822	38.3854	40.9707	5.04985				5.04985	4.8309	4.19303	3.19156	1.91333	0.469192	-1.01564	-2.4124	-3.59996	-4.47535	-4.96266	-5.01963	-4.64131	-3.86052	-2.74496	-1.39137	0.0828694	1.54993	2.88258	3.96527	4.70411	5.03502	4.92932	4.39617	3.48181	2.26551	0.85276	-0.633939	-2.06567	-3.31827	-4.28312	-4.87656	-5.04713	-4.78003	-4.09842	-3.06142	-1.75894	-0.30394	1.17742	2.55668	3.71423	4.54971	4.99065
1.18423	38.4934	41.0695	5.06655				5.06655	4.84612	4.20403	3.19613	1.91014	0.457941	-1.0341	-2.43617	-3.62626	-4.50082	-4.98376	-5.03306	-4.64442	-3.85166	-2.72376	-1.35886	0.124275	1.5966	2.92999	4.00845	4.73812	5.05552	4.93303	4.38131	3.44837	2.21537	0.789615	-0.704849	-2.13798	-3.38509	-4.33765	-4.91278	-5.06045	-4.7678	-4.06029	-2.99949	-1.6777	-0.209932	1.2761	2.6511	3.79543	4.6095	5.0225
1.18625	38.3275	41.1283	5.54597				5.54597	5.30387	4.59871	3.49205	2.08051	0.487327	-1.1484	-2.68387	-3.98501	-4.93824	-5.46033	-5.50569	-5.07037	-4.19238	-2.94836	-1.44693	0.180828	1.7928	3.24824	4.4201	5.20604	5.53747	5.38544	4.76323	3.72515	2.36184	0.792332	-0.846355	-2.41115	-3.76544	-4.79097	-5.39823	-5.53418	-5.18696	-4.38689	-3.20381	-1.74102	-0.126225	1.49959	2.99448	4.22793	5.09226	5.512
1.18827	38.2138	40.8177	5.19132				5.19132	4.96394	4.3017	3.26263	1.93774	0.443105	-1.09035	-2.52829	-3.74474	-4.63315	-5.11568	-5.15007	-4.73331	-3.90189	-2.72866	-1.3164	0.211182	1.72027	3.07865	4.16734	4.89096	5.18612	5.02697	4.42745	3.44007	2.15134	0.674139	-0.862112	-2.32284	-3.58008	-4.52371	-5.07104	-5.17414	-4.82398	-4.05123	-2.92358	-1.53982	-0.0211639	1.49934	2.8885	4.02462	4.80818	5.17053
1.19029	38.3406	40.6853	4.70654				4.70654	4.4997	3.89733	2.95241	1.74797	0.389884	-1.00247	-2.3067	-3.40819	-4.2101	-4.64195	-4.66578	-4.2795	-3.51707	-2.44549	-1.15895	0.229452	1.59769	2.82549	3.80494	4.44994	4.7038	4.5442	3.98519	3.07588	1.89621	0.549862	-0.844814	-2.16523	-3.29533	-4.13578	-4.6127	-4.68417	-4.34392	-3.62184	-2.58141	-1.31408	0.0687517	1.44554	2.69527	3.7081	4.39498	4.69556
1.19232	38.2672	40.6802	4.87667				4.87667	4.66162	4.03543	3.05334	1.80195	0.391644	-1.05321	-2.40517	-3.54501	-4.37219	-4.81376	-4.83078	-4.42175	-3.62274	-2.50421	-1.16483	0.277289	1.69495	2.96312	3.96996	4.62667	4.87532	4.69399	4.09867	3.14187	1.90796	0.505783	-0.941004	-2.3048	-3.46532	-4.32021	-4.79408	-4.84514	-4.46887	-3.69846	-2.60187	-1.27581	0.162781	1.58701	2.87127	3.9023	4.58916	4.87128
1.19434	38.3257	40.8576	5.15194				5.15194	4.92398	4.26029	3.2196	1.89399	0.400783	-1.12789	-2.55676	-3.75937	-4.6293	-5.08958	-5.09947	-4.65809	-3.8045	-2.61424	-1.19265	0.334491	1.83203	3.16745	4.22257	4.90402	5.15151	4.94312	4.29731	3.27121	1.95564	0.467008	-1.06295	-2.49885	-3.71361	-4.59975	-5.07885	-5.1085	-4.68609	-3.849	-2.67129	-1.2572	0.268144	1.76976	3.11477	4.18414	4.88325	5.15022
1.19636	38.139	40.8537	5.56105				5.56105	5.31416	4.59544	3.46868	2.03394	0.418608	-1.23389	-2.77684	-4.07323	-5.00795	-5.49803	-5.49993	-5.01349	-4.08191	-2.78789	-1.24634	0.405879	2.02206	3.4587	4.58824	5.31039	5.56103	5.31791	4.60261	3.47865	2.04582	0.431335	-1.22144	-2.76577	-4.06453	-5.00239	-5.49609	-5.5018	-5.019	-4.09056	-2.79893	-1.25877	0.393148	2.01016	3.44869	4.58101	5.30659	5.56099
1.19838	37.9496	40.5781	5.42123				5.42123	5.17975	4.47681	3.37505	1.97261	0.394432	-1.21888	-2.72361	-3.98569	-4.8927	-5.36383	-5.35711	-4.87313	-3.95502	-2.68456	-1.17494	0.439347	2.0145	3.41018	4.50206	5.19286	5.42104	5.16627	4.45125	3.33968	1.93058	0.34949	-1.26273	-2.76246	-4.01609	-4.91194	-5.37019	-5.35002	-4.85323	-3.92407	-2.64533	-1.13093	0.484232	2.05625	3.44509	4.527	5.20562	5.42048
1.20041	38.007	40.2774	4.7143				4.7143	4.5036	3.89033	2.92932	1.70646	0.331066	-1.07392	-2.38291	-3.4789	-4.26392	-4.6678	-4.65443	-4.22502	-3.41794	-2.30534	-0.986668	0.420197	1.7895	2.99885	3.94013	4.52922	4.71345	4.47636	3.83913	2.85874	1.62281	0.241816	-1.16079	-2.45963	-3.53862	-4.30129	-4.67949	-4.63939	-4.18459	-3.35574	-2.22693	-0.899059	0.509178	1.8719	3.0673	3.98852	4.55321	4.71091
1.20243	38.0345	40.0685	4.25203				4.25203	4.06136	3.50643	2.63703	1.53112	0.287892	-0.981158	-2.16221	-3.14934	-3.85402	-4.21305	-4.19422	-3.79923	-3.0635	-2.05301	-0.858398	0.413202	1.64774	2.7345	3.57602	4.09681	4.25017	4.02236	3.43379	2.53725	1.41316	0.162331	-1.10306	-2.26952	-3.23244	-3.90545	-4.22819	-4.17172	-3.74111	-2.97497	-1.94202	-0.734888	0.538149	1.76292	2.82958	3.64247	4.12868	4.2446
1.20445	38.0281	40.0359	4.22569				4.22569	4.03556	3.48229	2.61567	1.51367	0.275462	-0.987532	-2.16166	-3.14127	-3.83822	-4.18977	-4.16431	-3.76412	-3.02521	-2.01408	-0.821704	0.444609	1.67091	2.74686	3.57563	4.08264	4.22228	3.98196	3.38333	2.48025	1.35398	0.10587	-1.15177	-2.30576	-3.25227	-3.90612	-4.20847	-4.13213	-3.68395	-2.90426	-1.86324	-0.654551	0.613039	1.82546	2.87362	3.6632	4.12314	4.21205
1.20647	38.1882	40.1243	4.102				4.102	3.91683	3.37802	2.53422	1.46163	0.257063	-0.970708	-2.11084	-3.06039	-3.73364	-4.06979	-4.03849	-3.64258	-2.9178	-1.92958	-0.767152	0.464542	1.65429	2.69469	3.49179	3.97363	4.09672	3.84992	3.25554	2.36723	1.26519	0.0489219	-1.17176	-2.28665	-3.19509	-3.81506	-4.09058	-3.99679	-3.54214	-2.76769	-1.74335	-0.561617	0.670823	1.8427	2.8482	3.59656	4.02019	4.08087
1.2085	37.9799	40.1345	4.59589				4.59589	4.38772	3.78209	2.83384	1.62889	0.276374	-1.10117	-2.37897	-3.44126	-4.19182	-4.56265	-4.52016	-4.06821	-3.24772	-2.13304	-0.825124	0.557534	1.88969	3.05066	3.93528	4.46341	4.58722	4.29548	3.61462	2.60633	1.36194	-0.00582927	-1.37307	-2.61593	-3.62181	-4.29961	-4.58792	-4.46062	-3.92924	-3.04193	-1.87905	-0.54596	0.83659	2.14336	3.25596	4.07362	4.52225	4.56123
1.21052	38.033	40.4041	5.09147				5.09147	4.86009	4.18699	3.13334	1.79491	0.293342	-1.23489	-2.65088	-3.82594	-4.65327	-5.05767	-5.00239	-4.49245	-3.5742	-2.3311	-0.876131	0.658469	2.13322	3.41409	4.38466	4.95671	5.07826	4.73826	3.9676	2.83634	1.44729	-0.0733063	-1.58724	-2.95691	-4.05783	-4.78994	-5.08671	-4.92115	-4.30832	-3.30392	-1.99923	-0.512829	1.02018	2.46046	3.67712	4.55958	5.02762	5.03871
1.21254	37.9927	40.3472	5.08966				5.08966	4.8576	4.18257	3.12615	1.78465	0.280407	-1.2494	-2.66528	-3.83811	-4.66095	-5.05876	-4.99526	-4.47625	-3.54906	-2.29822	-0.837815	0.698991	2.17206	3.44705	4.40772	4.96644	5.07228	4.71558	3.92888	2.78389	1.38505	-0.140092	-1.65246	-3.01414	-4.10097	-4.81383	-5.08772	-4.89766	-4.26099	-3.23577	-1.91547	-0.420507	1.1128	2.54464	3.74443	4.60277	5.04139	5.02028
1.21456	37.8996	40.2124	5.03281				5.03281	4.80258	4.13296	3.08521	1.75519	0.264585	-1.25022	-2.65065	-3.80857	-4.61803	-5.00499	-4.93403	-4.41166	-3.48566	-2.24075	-0.79083	0.73144	2.18679	3.44207	4.38243	4.92184	5.01094	4.64159	3.84757	2.70153	1.30833	-0.204569	-1.69875	-3.03752	-4.09838	-4.78427	-5.03245	-4.8202	-4.16695	-3.13245	-1.81137	-0.324563	1.19194	2.59939	3.76902	4.59382	4.99832	4.94552
1.21659	37.835	40.2144	5.21257				5.21257	4.97332	4.27756	3.18913	1.80796	0.260826	-1.31025	-2.76105	-3.9584	-4.79239	-5.18647	-5.10445	-4.55387	-3.58527	-2.28756	-0.779866	0.799417	2.30532	3.5996	4.56346	5.10842	5.18445	4.78458	3.9455	2.74425	1.2911	-0.280579	-1.8265	-3.20475	-4.28883	-4.97921	-5.21253	-4.96737	-4.26622	-3.17346	-1.78939	-0.24107	1.32938	2.77781	3.97124	4.80014	5.18841	5.1004
1.21861	37.7327	40.096	5.21172				5.21172	4.97173	4.27385	3.18237	1.79779	0.24764	-1.32532	-2.77621	-3.97143	-4.80088	-5.18819	-5.09768	-4.53768	-3.55978	-2.25403	-0.740683	0.840874	2.34499	3.63314	4.58668	5.1178	5.17759	4.76053	3.90504	2.68991	1.22704	-0.348838	-1.89259	-3.26203	-4.33105	-5.00119	-5.21074	-4.94039	-4.21504	-3.10149	-1.70231	-0.146348	1.42309	2.86147	4.03631	4.83942	5.19683	5.07563
1.22063	37.8836	40.0117	4.72418				4.72418	4.50592	3.87131	2.87899	1.62065	0.212558	-1.21517	-2.53062	-3.61224	-4.36008	-4.70505	-4.61527	-4.09903	-3.20404	-2.013	-0.635952	0.799857	2.16176	3.32391	4.17894	4.64782	4.68725	4.29356	3.50315	2.38905	1.0542	-0.378065	-1.77539	-3.00867	-3.96395	-4.55296	-4.72127	-4.45333	-3.7739	-2.74576	-1.46391	-0.0467888	1.37465	2.66907	3.71687	4.42122	4.71706	4.57703
1.22265	37.7387	40.0017	5.05698				5.05698	4.82258	4.1411	3.07573	1.72522	0.214775	-1.31558	-2.72397	-3.87984	-4.67603	-5.03874	-4.93433	-4.37248	-3.40529	-2.12241	-0.642776	0.896447	2.35257	3.59059	4.49575	4.98414	5.01047	4.57231	3.71028	2.50429	1.06614	-0.470847	-1.96418	-3.27543	-4.28303	-4.89358	-5.05047	-4.73916	-3.9885	-2.8681	-1.48181	0.0418496	1.56163	2.93664	4.03941	4.76771	5.05402	4.8718
1.22468	37.8002	39.9287	4.78825				4.78825	4.56557	3.91825	2.90649	1.6244	0.191222	-1.25974	-2.59353	-3.6861	-4.43582	-4.77297	-4.66619	-4.1254	-3.2009	-1.97869	-0.572446	0.887045	2.26403	3.43044	4.27778	4.72725	4.73703	4.30623	3.4749	2.32037	0.950018	-0.508691	-1.92009	-3.1529	-4.09245	-4.65137	-4.77766	-4.45959	-3.72672	-2.64724	-1.32153	0.127092	1.56389	2.85524	3.88101	4.54582	4.78782	4.5845
1.2267	37.7677	39.9594	4.96291				4.96291	4.73136	4.05829	3.00653	1.67422	0.185675	-1.32019	-2.70287	-3.83333	-4.60608	-4.94902	-4.83014	-4.26054	-3.29336	-2.01887	-0.555987	0.958778	2.38408	3.5869	4.45502	4.90742	4.90188	4.43893	3.56175	2.35222	0.923185	-0.591994	-2.05193	-3.32039	-4.27901	-4.83834	-4.94618	-4.59246	-3.8102	-2.6724	-1.28521	0.221896	1.7083	3.03529	4.07905	4.74217	4.96278	4.72029
1.22872	37.8388	39.8808	4.65437				4.65437	4.4365	3.80329	2.81401	1.56128	0.162388	-1.25171	-2.54862	-3.60693	-4.32756	-4.64304	-4.52384	-3.98112	-3.06569	-1.86325	-0.486372	0.936041	2.27082	3.39301	4.19754	4.6091	4.58916	4.13958	3.30245	2.15615	0.807988	-0.615817	-1.98197	-3.16257	-4.04709	-4.55272	-4.63213	-4.27788	-3.52313	-2.43855	-1.12567	0.292594	1.68346	2.91673	3.87693	4.47417	4.65255	4.39535
1.23074	37.8961	39.8506	4.4843				4.4843	4.2737	3.6617	2.70576	1.49569	0.145137	-1.21905	-2.46874	-3.48655	-4.17688	-4.4749	-4.35261	-3.8215	-2.93145	-1.76607	-0.434804	0.9373	2.22137	3.29679	4.06256	4.44676	4.41328	3.96529	3.14486	2.02904	0.722648	-0.651622	-1.96469	-3.09322	-3.93122	-4.39998	-4.45546	-4.09247	-3.34509	-2.28352	-1.00746	0.363214	1.69978	2.87669	3.78341	4.33476	4.47898	4.2025
1.23277	37.5669	39.8449	5.26117				5.26117	5.01328	4.29297	3.16813	1.74474	0.156937	-1.44565	-2.91201	-4.10397	-4.90919	-5.2518	-5.09952	-4.4667	-3.41296	-2.03761	-0.470254	1.14142	2.64553	3.90035	4.78763	5.22375	5.16762	4.62453	3.64565	2.32324	0.781896	-0.833126	-2.36964	-3.68286	-4.64902	-5.1771	-5.21732	-4.7659	-3.86537	-2.60059	-1.09076	0.521867	2.08531	3.45225	4.49388	5.11203	5.24846	4.89031
1.23479	37.462	39.677	5.14916				5.14916	4.90576	4.19857	3.09445	1.69778	0.1406	-1.42987	-2.86516	-4.02958	-4.81304	-5.14148	-4.98385	-4.35504	-3.31451	-1.96062	-0.421381	1.1577	2.62733	3.84857	4.70597	5.11847	5.04707	4.49852	3.52468	2.21762	0.700905	-0.882073	-2.38166	-3.65609	-4.58486	-5.08019	-5.09524	-4.62858	-3.72434	-2.468	-0.978338	0.603818	2.12889	3.4527	4.45008	5.02676	5.12821	4.74484
1.23681	37.5457	39.4014	4.34225				4.34225	4.13633	3.53809	2.60427	1.42344	0.107607	-1.21843	-2.42891	-3.40901	-4.06578	-4.33692	-4.19672	-3.65847	-2.77323	-1.62495	-0.322555	1.01043	2.24759	3.27156	3.98524	4.32093	4.2468	3.76986	2.93537	1.82247	0.536712	-0.799952	-2.06074	-3.12608	-3.89492	-4.29433	-4.28644	-3.872	-3.09031	-2.01551	-0.74955	0.587504	1.86884	2.97291	3.79502	4.25718	4.31556	3.96462
1.23884	37.7319	39.4235	3.98436				3.98436	3.79479	3.24413	2.38476	1.29848	0.0886301	-1.12965	-2.24044	-3.13803	-3.73702	-3.98042	-3.84505	-3.3438	-2.52437	-1.46473	-0.265715	0.958587	2.09167	3.02572	3.67186	3.9686	3.8877	3.43686	2.65898	1.62809	0.442274	-0.785627	-1.93877	-2.90743	-3.59943	-3.94892	-3.92265	-3.52311	-2.78833	-1.78822	-0.617957	0.611113	1.78203	2.78338	3.51987	3.92143	3.94984	3.60239
1.24086	37.7673	39.6162	4.38336				4.38336	4.17413	3.56642	2.61825	1.42013	0.08644	-1.2555	-2.47759	-3.46316	-4.11812	-4.37995	-4.22365	-3.66414	-2.75484	-1.58255	-0.259186	1.08892	2.33308	3.35451	4.0557	4.36973	4.2666	3.75616	2.88714	1.74251	0.431528	-0.920648	-2.18494	-3.24064	-3.98698	-4.35271	-4.30291	-3.84233	-3.01495	-1.89976	-0.603199	0.750941	2.03339	3.12173	3.91205	4.32892	4.33252	3.92253
1.24288	37.5477	39.4558	4.55336				4.55336	4.33531	3.70206	2.71426	1.4665	0.0782971	-1.31741	-2.58694	-3.60872	-4.28488	-4.55066	-4.38062	-3.79103	-2.83837	-1.61387	-0.234799	1.16675	2.45657	3.5111	4.22938	4.54259	4.42075	3.87552	2.95912	1.75932	0.391023	-1.01472	-2.32328	-3.40934	-4.16887	-4.52914	-4.45564	-3.95542	-3.07637	-1.90269	-0.546784	0.861488	2.18725	3.30354	4.10344	4.51034	4.48527	4.03064
1.2449	37.3741	39.0574	4.04286				4.04286	3.84864	3.28463	2.40503	1.29436	0.059312	-1.18143	-2.30866	-3.21407	-3.81066	-4.04112	-3.88331	-3.35237	-2.49934	-1.40617	-0.177885	1.06749	2.21029	3.14073	3.7694	4.0359	3.91463	3.41723	2.59149	1.51677	0.296305	-0.952626	-2.11003	-3.06469	-3.7249	-4.02721	-3.94258	-3.47914	-2.68142	-1.62606	-0.41447	0.836945	2.00794	2.98602	3.67719	4.01505	3.96714	3.53806
1.24693	37.4746	38.9699	3.61493				3.61493	3.4407	2.93482	2.14604	1.15039	0.0438618	-1.0669	-2.07482	-2.88274	-3.41278	-3.61386	-3.46659	-2.98517	-2.21599	-1.23321	-0.13156	0.982774	2.00238	2.82896	3.38286	3.61067	3.49044	3.03376	2.28464	1.3153	0.21918	-0.898071	-1.92875	-2.77352	-3.35094	-3.60535	-3.51223	-3.08056	-2.35195	-1.39662	-0.306671	0.81284	1.854	2.71645	3.31705	3.59791	3.53196	3.12555
1.24895	37.442	39.0495	3.91129				3.91129	3.72218	3.17312	2.31721	1.23721	0.0375824	-1.16568	-2.25623	-3.12859	-3.6984	-3.91057	-3.74458	-3.21647	-2.37733	-1.30829	-0.112733	1.09372	2.19441	3.0829	3.67326	3.9084	3.7656	3.25865	2.43657	1.37888	0.187842	-1.02136	-2.13179	-3.03607	-3.64676	-3.90479	-3.78522	-3.29961	-2.49492	-1.44896	-0.262882	0.948617	2.06838	2.98813	3.61892	3.89974	3.80345	3.33936
1.25097	37.4596	39.2785	4.45428				4.45428	4.23822	3.61099	2.63345	1.40043	0.0315531	-1.34039	-2.58229	-3.57368	-4.21838	-4.45383	-4.25721	-3.64758	-2.68408	-1.4602	-0.0946529	1.28007	2.53062	3.53565	4.19769	4.45249	4.27534	3.68343	2.73417	1.51967	0.157734	-1.2195	-2.47843	-3.49692	-4.17616	-4.45026	-4.29262	-3.71854	-2.78372	-1.57883	-0.220783	1.15869	2.42575	3.45748	4.15379	4.44713	4.30903	3.75291
1.25299	37.4182	39.1591	4.29108				4.29108	4.08227	3.47615	2.53172	1.34089	0.0195622	-1.30367	-2.50003	-3.45307	-4.07004	-4.2909	-4.09415	-3.49895	-2.5632	-1.378	-0.0586851	1.26634	2.46812	3.4297	4.05748	4.29037	4.1057	3.52145	2.59448	1.415	0.097803	-1.22891	-2.43602	-3.40604	-4.04458	-4.28948	-4.11691	-3.54366	-2.62553	-1.45187	-0.136913	1.19137	2.40371	3.3821	4.03134	4.28823	4.12777	3.56558
1.25502	37.4386	39.0558	4.01217				4.01217	3.81631	3.24782	2.36223	1.246	0.00810991	-1.23057	-2.3491	-3.23827	-3.81127	-4.01214	-3.82128	-3.25732	-2.37532	-1.26141	-0.0243296	1.21512	2.33593	3.22867	3.80617	4.01204	3.82619	3.26676	2.38838	1.27679	0.0405489	-1.19965	-2.32273	-3.21901	-3.80101	-4.01188	-3.83104	-3.27615	-2.40139	-1.29216	-0.0567675	1.18417	2.30948	3.20931	3.79578	4.01165	3.83583	3.28549
1.25704	37.3608	39.1807	4.54413				4.54413	4.32159	3.67574	2.66986	1.40247	-0.00228876	-1.40683	-2.67357	-3.67843	-4.323	-4.54413	-4.32017	-3.67305	-2.66616	-1.39812	0.00686627	1.41118	2.67727	3.68112	4.32441	4.54412	4.31875	3.67035	2.66245	1.39376	-0.0114438	-1.41553	-2.68096	-3.6838	-4.32581	-4.54411	-4.31732	-3.66765	-2.65874	-1.3894	0.0160213	1.41988	2.68466	3.68648	4.32721	4.5441	4.31589	3.66495
1.25906	37.3415	39.2992	4.91965				4.91965	4.67794	3.97657	2.88446	1.50891	-0.0149	-1.53725	-2.90855	-3.99405	-4.68708	-4.91956	-4.66863	-3.95895	-2.86027	-1.48052	0.0446994	1.56553	2.93253	4.01137	4.69605	4.91929	4.65915	3.94119	2.83597	1.45208	-0.0744972	-1.59375	-2.9564	-4.02855	-4.70485	-4.91884	-4.64949	-3.92328	-2.81157	-1.42358	0.104292	1.62191	2.98017	4.04558	4.71347	4.9182	4.63967	3.90523
1.26108	37.2898	39.2031	4.8389				4.8389	4.60041	3.90843	2.83117	1.47484	-0.0268735	-1.52594	-2.87459	-3.93987	-4.61679	-4.8386	-4.58346	-3.8765	-2.78741	-1.42356	0.0806173	1.57685	2.91764	3.97083	4.6326	4.83771	4.56594	3.84409	2.74331	1.37211	-0.134351	-1.62756	-2.96034	-4.0013	-4.64784	-4.83622	-4.54786	-3.81121	-2.69886	-1.32048	0.188068	1.67808	3.00267	4.03128	4.66251	4.83413	4.52923	3.77786
1.26311	37.2544	38.8662	4.10273				4.10273	3.89987	3.31136	2.39538	1.24253	-0.0331956	-1.30564	-2.44897	-3.35012	-3.91998	-4.10219	-3.87875	-3.27173	-2.34117	-1.1791	0.099578	1.36841	2.50191	3.38801	3.93906	4.10058	3.8566	3.23124	2.28635	1.11535	-0.165934	-1.43081	-2.5542	-3.425	-3.95711	-4.0979	-3.83345	-3.18991	-2.23092	-1.05132	0.232247	1.49285	2.60582	3.4611	3.97412	4.09414	3.80929	3.14774
1.26513	37.2445	38.6815	3.68122				3.68122	3.49862	2.96895	2.14475	1.10778	-0.0390797	-1.18207	-2.20779	-3.01449	-3.52214	-3.68039	-3.47352	-2.92208	-2.08075	-1.033	0.117221	1.25582	2.26983	3.05867	3.54407	3.6779	3.44686	2.87388	2.01581	0.957754	-0.19531	-1.329	-2.33085	-3.10147	-3.56441	-3.67375	-3.41864	-2.82439	-1.94996	-0.882075	0.273311	1.40158	2.39081	3.14287	3.58314	3.66795	3.38889	2.77363
1.26715	37.2308	38.6875	3.75539				3.75539	3.56853	3.02653	2.18334	1.12287	-0.0493489	-1.21666	-2.26288	-3.08391	-3.59804	-3.7541	-3.53655	-2.96706	-2.10229	-1.02831	0.148012	1.3096	2.34086	3.13917	3.62507	3.75021	3.50213	2.90554	2.01979	0.933034	-0.246574	-1.40164	-2.41722	-3.19225	-3.64959	-3.74373	-3.4653	-2.84201	-1.93589	-0.837117	0.344965	1.49272	2.49192	3.24313	3.67159	3.73466	3.42607	2.77652
1.26917	37.4057	38.6599	3.25432				3.25432	3.09187	2.62076	1.88801	0.966771	-0.0509806	-1.06364	-1.97012	-2.67991	-3.12216	-3.25272	-3.05855	-2.55903	-1.80404	-0.868951	0.152892	1.15947	2.0503	2.73644	3.14939	3.24793	3.02222	2.4948	1.71831	0.770277	-0.254653	-1.25416	-2.12846	-2.79027	-3.17352	-3.23995	-2.98293	-2.42811	-1.63089	-0.670847	0.356164	1.34762	2.20454	2.84137	3.19454	3.22879	2.9407	2.35904
1.2712	37.2617	38.6135	3.52995				3.52995	3.35318	2.8406	2.04354	1.04181	-0.0642544	-1.16388	-2.14695	-2.915	-3.39111	-3.52761	-3.31081	-2.76244	-1.93741	-0.918354	0.192678	1.28441	2.24752	2.98553	3.42454	3.52059	3.26405	2.68062	1.82872	0.793683	-0.320846	-1.40324	-2.3451	-3.05211	-3.45344	-3.50891	-3.21297	-2.59525	-1.71761	-0.667959	0.44859	1.52021	2.43959	3.11464	3.47776	3.49258	3.15762	2.50643
1.27322	37.0708	38.774	4.47573				4.47573	4.2509	3.59901	2.58553	1.3123	-0.0927694	-1.48852	-2.73473	-3.70619	-4.30531	-4.47189	-4.1892	-3.48564	-2.4319	-1.13383	0.278149	1.66218	2.87922	3.807	4.35231	4.46036	4.12029	3.36628	2.27408	0.953406	-0.46305	-1.83299	-3.01877	-3.90127	-4.39183	-4.44116	-4.04431	-3.24114	-2.11235	-0.771346	0.647156	2.00064	3.15313	3.98884	4.42381	4.41433	3.96137	3.11043
1.27524	37.1244	38.767	4.34415				4.34415	4.12524	3.49059	2.50415	1.26533	-0.101008	-1.45717	-2.66647	-3.60704	-4.18409	-4.33945	-4.05748	-3.36659	-2.33641	-1.07076	0.302807	1.64585	2.82303	3.71569	4.23388	4.32537	3.98094	3.23531	2.16362	0.873868	-0.50395	-1.83098	-2.97348	-3.8163	-4.27452	-4.30194	-3.8958	-3.09703	-1.98615	-0.675089	0.704004	2.01215	3.1175	3.90867	4.30591	4.2692	3.80223	2.95206
1.27726	37.2537	39.1576	5.06736				5.06736	4.81121	4.06865	2.91476	1.46619	-0.130615	-1.71421	-3.1245	-4.21891	-4.88679	-5.06063	-4.72284	-3.90758	-2.69727	-1.21426	0.391499	1.95768	3.32595	4.35796	4.94939	5.04045	4.62192	3.73612	2.47261	0.959114	-0.651342	-2.19595	-3.51855	-4.48543	-4.99884	-5.00687	-4.50871	-3.55473	-2.24137	-0.701416	0.909455	2.42838	3.7018	4.60097	5.03499	4.95998	4.38353	3.3639
1.27929	37.5074	39.0343	4.08973				4.08973	3.88235	3.28123	2.34733	1.17537	-0.11579	-1.39521	-2.53313	-3.41414	-3.9489	-4.08318	-3.80335	-3.13779	-2.154	-0.951765	0.346999	1.61057	2.7108	3.53611	4.0028	4.06353	3.71215	2.98429	1.95377	0.725107	-0.577096	-1.82077	-2.87979	-3.64674	-4.04386	-4.03085	-3.60905	-2.82122	-1.74728	-0.496125	0.805342	2.02513	3.03954	3.74568	4.07195	3.98525	3.49437	2.64911
1.28131	37.2544	38.7219	3.95555				3.95555	3.75434	3.17118	2.2654	1.12915	-0.121974	-1.36069	-2.46098	-3.31089	-3.82398	-3.94803	-3.67042	-3.01941	-2.06121	-0.893316	0.365459	1.58706	2.64719	3.43801	3.87907	3.92549	3.57254	2.85615	1.84918	0.654084	-0.607554	-1.80738	-2.82334	-3.55206	-3.91941	-3.88802	-3.46108	-2.68203	-1.63011	-0.412364	0.847338	2.02084	2.98874	3.65259	3.94484	3.83576	3.33645	2.4977
1.28333	36.9036	38.4086	4.08208				4.08208	3.87378	3.27015	2.33279	1.15736	-0.136178	-1.41582	-2.55098	-3.4258	-3.951	-4.07299	-3.77932	-3.09995	-2.10422	-0.893754	0.407928	1.66798	2.75781	3.56619	4.01063	4.04577	3.66803	2.91595	1.86629	0.626165	-0.677862	-1.91271	-2.95236	-3.69071	-4.05241	-4.00055	-3.54041	-2.71897	-1.62004	-0.355788	0.944778	2.14893	3.13377	3.7988	4.07615	3.93751	3.39704	2.50989
1.28535	36.8882	38.2047	3.59354				3.59354	3.4096	2.87662	2.04914	1.01189	-0.128949	-1.25659	-2.25559	-3.02368	-3.48222	-3.58429	-3.31942	-2.71474	-1.83214	-0.761982	0.386182	1.49481	2.45042	3.15516	3.53691	3.55657	3.21214	2.53888	1.6057	0.508149	-0.641427	-1.72534	-2.63262	-3.2704	-3.57338	-3.51054	-3.08832	-2.34994	-1.371	-0.251699	0.893368	1.94698	2.80127	3.36879	3.59144	3.44643	2.94859	2.14891
1.28738	36.9983	38.2177	3.34953				3.34953	3.17754	2.67924	1.90581	0.936654	-0.128686	-1.18081	-2.11167	-2.82568	-3.24951	-3.33964	-3.08681	-2.51699	-1.68868	-0.686966	0.385299	1.418	2.30508	2.95544	3.3023	3.31004	2.97786	2.33987	1.46159	0.433223	-0.639637	-1.64681	-2.48487	-3.06775	-3.33559	-3.26089	-2.85132	-2.14894	-1.22587	-0.176921	0.890199	1.8659	2.64999	3.16194	3.34918	3.19249	2.70794	1.94531
1.2894	36.9872	38.0675	2.98593				2.98593	2.83213	2.38659	1.6952	0.829184	-0.12225	-1.06109	-1.89063	-2.5254	-2.90003	-2.97592	-2.74524	-2.23178	-1.48841	-0.591716	0.365932	1.28588	2.07337	2.64728	2.94848	2.94595	2.63995	2.062	1.27164	0.350282	-0.607159	-1.50205	-2.24222	-2.75141	-2.97716	-2.89623	-2.51696	-1.8784	-1.04634	-0.106498	0.844316	1.70815	2.39603	2.83709	2.98588	2.8271	2.37708	1.6822
1.29142	36.8743	38.2917	3.94253				3.94253	3.73883	3.14879	2.23337	1.08718	-0.171362	-1.41219	-2.5071	-3.34294	-3.83334	-3.92763	-3.61607	-2.93085	-1.94277	-0.753944	0.512791	1.72654	2.76188	3.51182	3.89888	3.88305	3.46598	2.69076	1.63749	0.415015	-0.850344	-2.02784	-2.99578	-3.65417	-3.93496	-3.80913	-3.2897	-2.43033	-1.31983	-0.0729495	1.18147	2.31381	3.20705	3.7689	3.9413	3.70643	3.08856	2.15155
1.29345	37.0228	38.4277	3.93233				3.93233	3.72853	3.13824	2.22266	1.07669	-0.180887	-1.41971	-2.51138	-3.34273	-3.82758	-3.91569	-3.59791	-2.9072	-1.91513	-0.724552	0.54113	1.75072	2.77884	3.51892	3.89424	3.86591	3.43685	2.65154	1.59139	0.366283	-0.896793	-2.06691	-3.02278	-3.66533	-3.92794	-3.7834	-3.24669	-2.37345	-1.25418	-0.00491261	1.24487	2.36561	3.24114	3.78071	3.92839	3.66887	3.02906	2.07526
1.29547	37.0255	38.089	2.9954				2.9954	2.83968	2.38869	1.68934	0.814333	-0.145343	-1.08991	-1.92115	-2.55263	-2.9187	-2.9813	-2.73391	-2.20225	-1.44162	-0.53109	0.434661	1.35522	2.13486	2.69253	2.97024	2.93912	2.60239	1.99508	1.18032	0.242845	-0.719885	-1.60776	-2.32847	-2.80708	-2.99381	-2.86926	-2.44637	-1.76911	-0.907914	0.0476869	0.99833	1.84517	2.50016	2.89518	2.98918	2.77237	2.2673	1.52649
1.29749	36.9441	37.9869	2.95521				2.95521	2.8011	2.35484	1.66297	0.797659	-0.150846	-1.08362	-1.90337	-2.5246	-2.88253	-2.93981	-2.69047	-2.16052	-1.40524	-0.503388	0.450965	1.35828	2.12393	2.66806	2.93392	2.89377	2.55181	1.9437	1.13286	0.20387	-0.746384	-1.61879	-2.32236	-2.78371	-2.95473	-2.81757	-2.38655	-1.70661	-0.848677	0.0977721	1.03402	1.86243	2.49659	2.87035	2.94475	2.71201	2.19642	1.45174
1.29951	37.0901	38.1432	3.00311				3.00311	2.84602	2.39117	1.68616	0.804747	-0.160863	-1.10964	-1.94233	-2.57182	-2.93223	-2.98588	-2.72714	-2.18309	-1.41064	-0.490614	0.480744	1.40181	2.17621	2.72294	2.98479	2.93438	2.57697	1.94995	1.11893	0.17085	-0.795107	-1.67788	-2.38511	-2.84281	-3.0031	-2.8492	-2.39721	-1.69443	-0.814378	0.150875	1.10034	1.93469	2.56664	2.93006	2.98693	2.73132	2.18995	1.41946
1.30154	36.9313	38.0072	3.08755				3.08755	2.92554	2.45651	1.72968	0.821334	-0.173209	-1.14957	-2.0053	-2.65058	-3.01769	-3.06812	-2.79656	-2.23152	-1.43229	-0.482753	0.517447	1.46334	2.25567	2.81128	3.07186	3.01006	2.63237	1.97844	1.11687	0.138096	-0.855171	-1.75869	-2.47765	-2.93659	-3.08735	-2.91411	-2.43505	-1.70045	-0.78739	0.2083	1.18213	2.0319	2.66844	3.02493	3.06398	2.78148	2.20708	1.40105
1.30356	36.8326	37.9877	3.33531				3.33531	3.15976	2.65159	1.86429	0.880745	-0.195516	-1.2512	-2.17516	-2.87016	-3.26302	-3.31239	-3.01307	-2.39657	-1.52779	-0.498188	0.583861	1.60445	2.45614	3.04928	3.32143	3.24394	2.82496	2.10861	1.1703	0.108784	-0.96418	-1.93565	-2.70335	-3.18648	-3.33418	-3.13089	-2.59803	-1.79167	-0.796713	0.282116	1.33125	2.24024	2.91341	3.27989	3.3011	2.97482	2.33538	1.4501
1.30558	36.9114	37.8252	2.6548				2.6548	2.51464	2.10895	1.48058	0.695871	-0.162316	-1.00336	-1.73846	-2.29	-2.59973	-2.63495	-2.39195	-1.89637	-1.20056	-0.377973	0.484521	1.29585	1.97036	2.4368	2.64595	2.5757	2.23349	1.65543	0.902581	0.0544239	-0.79948	-1.56897	-2.17278	-2.54717	-2.6526	-2.47794	-2.04163	-1.38974	-0.59111	0.269939	1.10249	1.81862	2.34272	2.61945	2.6196	2.34313	1.81925	1.10327
1.3076	37.084	38.0358	2.78265				2.78265	2.63529	2.20881	1.54838	0.723958	-0.177145	-1.05949	-1.82961	-2.40595	-2.72747	-2.7601	-2.5004	-1.97586	-1.24205	-0.376693	0.528564	1.37784	2.08118	2.56409	2.77543	2.6928	2.32497	1.71088	0.915591	0.0233229	-0.871415	-1.67386	-2.29901	-2.68067	-2.7784	-2.58185	-2.11185	-1.41817	-0.574285	0.330426	1.20014	1.94274	2.47957	2.75378	2.73633	2.42905	1.8645	1.10247
1.30963	36.781	38.2891	4.4364				4.4364	4.20073	3.51877	2.46298	1.14551	-0.293657	-1.70163	-2.92881	-3.84484	-4.35238	-4.39752	-3.97546	-3.13104	-1.95398	-0.569319	0.875825	2.22792	3.34332	4.10352	4.42775	4.28157	3.68052	2.68844	1.41073	-0.016851	-1.44264	-2.71517	-3.69923	-4.29028	-4.42552	-4.09059	-3.32107	-2.19871	-0.842761	0.602726	1.98418	3.15483	3.9903	4.40185	4.34573	3.82791	2.90341	1.67045
1.31165	36.7447	38.094	3.9938				3.9938	3.781	3.16527	2.21223	1.02343	-0.274422	-1.54303	-2.64721	-3.46928	-3.92165	-3.95609	-3.56895	-2.80148	-1.73546	-0.484506	0.818084	2.03349	3.0322	3.70778	3.98823	3.84367	3.2895	2.38478	1.22593	-0.0635722	-1.3463	-2.48555	-3.35993	-3.87625	-3.97949	-3.65865	-2.94793	-1.92305	-0.693237	0.61045	1.84908	2.89067	3.6242	3.97152	3.8956	3.40455	2.55068	1.425
1.31367	36.9902	37.718	2.16737				2.16737	2.05153	1.7164	1.1978	0.551168	-0.154384	-0.843433	-1.44233	-1.88704	-2.13005	-2.14538	-1.93138	-1.51093	-0.928972	-0.247717	0.460018	1.11858	1.65757	2.01939	2.16534	2.07984	1.77202	1.27479	0.641287	-0.0607616	-0.756315	-1.37102	-1.83918	-2.11075	-2.15669	-1.9721	-1.5767	-1.01277	-0.340587	0.368007	1.03726	1.59564	1.98346	2.15927	2.10426	1.82433	1.34939	0.730207
1.31569	36.699	37.6552	2.86513				2.86513	2.71154	2.26721	1.5798	0.723012	-0.211301	-1.12296	-1.91421	-2.50023	-2.81818	-2.83397	-2.5459	-1.98487	-1.21102	-0.307335	0.629307	1.49847	2.20698	2.67886	2.86351	2.74115	2.32488	1.65934	0.815898	-0.115028	-1.03362	-1.84139	-2.45173	-2.7992	-2.84654	-2.58869	-2.05328	-1.29772	-0.40302	0.534889	1.41545	2.14425	2.64314	2.85864	2.76765	2.37991	1.737	0.907859
1.31772	36.5215	37.6955	3.53965				3.53965	3.34931	2.79877	1.94723	0.886271	-0.270003	-1.39724	-2.37421	-3.09584	-3.48452	-3.49846	-3.13615	-2.43656	-1.47493	-0.354675	0.803725	1.87569	2.74593	3.32085	3.53863	3.37585	2.85	2.01765	0.968305	-0.185175	-1.31874	-2.31048	-3.05374	-3.46858	-3.51038	-3.17466	-2.49752	-1.55177	-0.439143	0.720715	1.80306	2.6915	3.29047	3.53557	3.40043	2.89959	2.0869	1.04978
1.31974	36.8391	37.6752	2.53633				2.53633	2.39953	2.00389	1.39207	0.630095	-0.199855	-1.00825	-1.70787	-2.22327	-2.49883	-2.50484	-2.24064	-1.73474	-1.0417	-0.236294	0.594602	1.36136	1.98126	2.38743	2.53607	2.41113	2.0261	1.4225	0.665456	-0.163375	-0.974582	-1.68066	-2.20544	-2.49231	-2.51032	-2.25754	-1.76124	-1.07494	-0.272684	0.558986	1.33036	1.95822	2.37484	2.53528	2.42223	2.04789	1.45263	0.700679
1.32176	37.0511	37.6306	1.76871				1.76871	1.67302	1.39631	0.96852	0.435934	-0.14382	-0.708013	-1.1956	-1.55382	-1.74392	-1.74532	-1.55788	-1.20187	-0.715826	-0.152325	0.427658	0.961367	1.39106	1.67023	1.76869	1.67577	1.40153	0.97565	0.4442	-0.135312	-0.700184	-1.1893	-1.54972	-1.74247	-1.74668	-1.5619	-1.20812	-0.723622	-0.160826	0.419371	0.954192	1.38577	1.66741	1.76863	1.67848	1.40672	0.982757	0.452456
1.32378	36.9921	37.7813	2.42357				2.42357	2.29206	1.91179	1.32404	0.592592	-0.203168	-0.976879	-1.64457	-2.13378	-2.39141	-2.38951	-2.12827	-1.63606	-0.966289	-0.191647	0.603794	1.33371	1.91887	2.29579	2.42354	2.28828	1.90466	1.31434	0.581377	-0.214685	-0.987447	-1.65304	-2.13924	-2.39326	-2.38755	-2.12272	-1.62751	-0.955677	-0.180122	0.614983	1.34334	1.92591	2.29947	2.42346	2.28444	1.89749	1.30462	0.570148
1.32581	37.1445	37.8073	2.04789				2.04789	1.93643	1.61417	1.11619	0.496703	-0.176853	-0.831157	-1.39498	-1.80695	-2.02222	-2.01735	-1.79287	-1.37323	-0.804097	-0.147431	0.525283	1.14082	1.63216	1.94583	2.04768	1.92662	1.59584	1.09133	0.468019	-0.206238	-0.858044	-1.41644	-1.82065	-2.02667	-2.01206	-1.77843	-1.35119	-0.77687	-0.117979	0.553755	1.16521	1.64982	1.95483	2.04704	1.91642	1.57717	1.06624	0.439238
1.32783	37.0842	37.6664	1.80991				1.80991	1.7111	1.42546	0.984176	0.435433	-0.160854	-0.739577	-1.23755	-1.60039	-1.7885	-1.78132	-1.57964	-1.20549	-0.69971	-0.117532	0.477479	1.02035	1.45182	1.72477	1.80939	1.69645	1.39828	0.947431	0.393137	-0.204082	-0.779018	-1.26889	-1.62022	-1.79465	-1.77311	-1.55798	-1.17273	-0.65944	-0.0741436	0.519248	1.05595	1.47735	1.73744	1.80782	1.68082	1.37029	0.910139	0.350615
1.32985	36.9383	37.618	2.12576				2.12576	2.00936	1.6729	1.15322	0.507254	-0.19427	-0.874518	-1.45899	-1.88368	-2.10207	-2.09026	-1.84952	-1.40623	-0.808931	-0.123043	0.576321	1.21257	1.71602	2.03153	2.12456	1.98492	1.62789	1.09258	0.437613	-0.265279	-0.939118	-1.51011	-1.91572	-2.11152	-2.07608	-1.81327	-1.35188	-0.742431	-0.051676	0.644738	1.27054	1.7572	2.05142	2.12097	1.95823	1.58104	1.0307	0.367479
1.33187	37.0347	37.4263	1.23226				1.23226	1.16458	0.968972	0.666929	0.291625	-0.115712	-0.510339	-0.848907	-1.09422	-1.21935	-1.21053	-1.06873	-0.809543	-0.461428	-0.0626258	0.343055	0.711052	1.00094	1.18088	1.23111	1.1461	0.935193	0.62156	0.239651	-0.168583	-0.558298	-0.886687	-1.11768	-1.22589	-1.19945	-1.04125	-0.768669	-0.411655	-0.00942271	0.393845	0.75385	1.03105	1.19499	1.22766	1.12548	0.899669	0.575033	0.18723
1.3339	36.9815	37.285	0.96081				0.96081	0.907879	0.75492	0.518784	0.225489	-0.0926496	-0.40058	-0.664376	-0.854971	-0.951367	-0.942942	-0.830625	-0.62679	-0.353897	-0.0420114	0.274503	0.560772	0.785257	0.923223	0.959469	0.890002	0.722476	0.475348	0.175847	-0.143029	-0.446146	-0.700107	-0.876931	-0.957136	-0.931885	-0.803959	-0.587455	-0.306225	0.00874393	0.32275	0.601195	0.813402	0.935989	0.95545	0.86964	0.688015	0.430584	0.125713
1.33592	36.916	37.3537	1.39405				1.39405	1.31702	1.09445	0.750932	0.324427	-0.137929	-0.585044	-0.967505	-1.24305	-1.38122	-1.36676	-1.20125	-0.902998	-0.504954	-0.051107	0.408387	0.822751	1.14619	1.34297	1.39133	1.28594	1.03844	0.676186	0.239203	-0.224215	-0.662854	-1.02824	-1.28	-1.3903	-1.34697	-1.15478	-0.834972	-0.422896	0.0359147	0.490756	0.891365	1.19347	1.36368	1.3832	1.24985	0.97839	0.598805	0.153046
1.33794	36.8649	37.5194	2.09734				2.09734	1.98111	1.64528	1.12709	0.483978	-0.212783	-0.88596	-1.46094	-1.87398	-2.07931	-2.05417	-1.80134	-1.34885	-0.74685	-0.0620702	0.62959	1.25147	1.73463	2.02552	2.0919	1.92642	1.54741	0.996879	0.335856	-0.362393	-1.02047	-1.56545	-1.9369	-2.09367	-2.01837	-1.71936	-1.22977	-0.603867	0.0889651	0.771936	1.36935	1.81498	2.05943	2.07562	1.86174	1.44151	0.861494	0.185993
1.33996	36.8401	37.4009	1.80807				1.80807	1.70756	1.41722	0.969328	0.41367	-0.187976	-0.768725	-1.26401	-1.61878	-1.79358	-1.76898	-1.54772	-1.1544	-0.632734	-0.0407304	0.555802	1.09054	1.50405	1.75034	1.80205	1.65341	1.32096	0.841658	0.268784	-0.333971	-0.899597	-1.36521	-1.67905	-1.80623	-1.7326	-1.46636	-1.03709	-0.492531	0.106787	0.694232	1.2045	1.58086	1.78147	1.78403	1.58825	1.2159	0.708383	0.122109
1.34199	36.824	37.1236	0.971747				0.971747	0.917569	0.761076	0.519717	0.220407	-0.10348	-0.415829	-0.68181	-0.871764	-0.964511	-0.949708	-0.829007	-0.615866	-0.334051	-0.0149876	0.305747	0.592389	0.812975	0.94291	0.967703	0.884591	0.702841	0.44272	0.133232	-0.191112	-0.494145	-0.742078	-0.907265	-0.971285	-0.927001	-0.779349	-0.544795	-0.249493	0.0736298	0.388542	0.660129	0.858108	0.960401	0.955604	0.84425	0.638756	0.362037	0.0449486
1.34401	36.6453	36.9678	1.05243				1.05243	0.993579	0.823606	0.561521	0.236636	-0.114714	-0.453235	-0.741066	-0.946017	-1.04517	-1.02742	-0.894775	-0.662055	-0.355291	-0.00879188	0.338691	0.648294	0.885393	1.02347	1.04708	0.953589	0.753448	0.469041	0.132176	-0.21947	-0.546572	-0.812545	-0.987643	-1.05228	-0.999238	-0.834438	-0.576314	-0.253736	0.0972197	0.437303	0.728478	0.93818	1.04296	1.03109	0.903907	0.675631	0.371793	0.0263732
1.34603	36.3423	37.0237	2.2368				2.2368	2.11135	1.74906	1.19057	0.498535	-0.249423	-0.969403	-1.58064	-2.01458	-2.22253	-2.18118	-1.89515	-1.39655	-0.741285	-0.00287201	0.735864	1.39206	1.8921	2.1799	2.22317	2.01707	1.5847	0.974576	0.25513	-0.492934	-1.1857	-1.74547	-2.10944	-2.23679	-2.11324	-1.75263	-1.19543	-0.504133	0.243714	0.964223	1.57657	2.01207	2.22187	2.18244	1.8982	1.40103	0.746702	0.00861601
1.34805	36.49	37.2142	2.39147				2.39147	2.25694	1.86849	1.26983	0.528297	-0.27267	-1.04296	-1.69591	-2.15806	-2.37741	-2.32929	-2.01911	-1.48176	-0.777713	0.013837	0.80383	1.50339	2.0338	2.3354	2.37425	2.14599	1.67628	1.01799	0.245158	-0.555251	-1.29319	-1.88564	-2.26594	-2.39131	-2.24764	-1.85109	-1.24629	-0.501271	0.300144	1.06779	1.71531	2.16984	2.38025	2.32286	2.00414	1.45994	0.751491	-0.0415092
1.35008	36.6668	37.3658	2.32248				2.32248	2.19145	1.81312	1.2302	0.508458	-0.270658	-1.01923	-1.65279	-2.09985	-2.30995	-2.2594	-1.95389	-1.42789	-0.740772	0.0299383	0.797271	1.47464	1.9856	2.27251	2.30298	2.07357	1.61018	0.965095	0.211104	-0.566708	-1.28057	-1.84993	-2.21054	-2.32171	-2.17089	-1.7751	-1.17901	-0.44987	0.330032	1.07269	1.69431	2.12473	2.3154	2.24479	1.92087	1.3802	0.683782	-0.0897951
1.3521	36.7515	37.4587	2.36385				2.36385	2.23009	1.84392	1.24907	0.512855	-0.281407	-1.04382	-1.6881	-2.14132	-2.35219	-2.29685	-1.98156	-1.442	-0.739244	0.0471818	0.828267	1.51561	2.03142	2.31733	2.34096	2.09965	1.62071	0.958339	0.187508	-0.604544	-1.32818	-1.90149	-2.2596	-2.36197	-2.19702	-1.78342	-1.16798	-0.420349	0.374856	1.12764	1.75279	2.17957	2.35968	2.27272	1.92854	1.3661	0.649042	-0.14147
1.35412	36.6775	37.2977	2.08523				2.08523	1.96688	1.62526	1.09916	0.448292	-0.253464	-0.926449	-1.49427	-1.89248	-2.07586	-2.02361	-1.74165	-1.262	-0.639093	0.056359	0.745413	1.34985	1.80107	2.04784	2.06216	1.8424	1.4135	0.824151	0.141253	-0.557679	-1.19331	-1.69348	-2.00142	-2.08218	-1.92658	-1.5523	-1.0018	-0.337595	0.364935	1.02604	1.57068	1.93702	2.0835	1.99346	1.67715	1.17046	0.530905	-0.168912
1.35615	36.7542	37.2171	1.56553				1.56553	1.47641	1.21921	0.823194	0.333461	-0.194236	-0.69982	-1.12573	-1.42348	-1.55916	-1.51733	-1.30276	-0.939867	-0.469971	0.0534306	0.57075	1.02309	1.35895	1.5401	1.5459	1.37571	1.04889	0.602656	0.0878102	-0.437032	-0.912119	-1.28336	-1.50849	-1.56188	-1.43746	-1.14937	-0.730434	-0.228336	0.299758	0.793724	1.19733	1.46461	1.56515	1.4875	1.2405	0.852266	0.367003	-0.160043
1.35817	36.7579	37.1278	1.25857				1.25857	1.18671	0.979353	0.660164	0.265593	-0.159304	-0.566012	-0.908089	-1.14647	-1.25395	-1.21824	-1.04343	-0.749469	-0.369932	0.051846	0.467704	0.830157	1.09782	1.24012	1.24083	1.09984	0.833272	0.471555	0.0559931	-0.365963	-0.746131	-1.0411	-1.21719	-1.2543	-1.14818	-0.910958	-0.569716	-0.163421	0.261534	0.656626	0.976741	1.18533	1.25856	1.18809	0.981955	0.663694	0.269649	-0.155186
1.36019	36.6805	37.0744	1.3485				1.3485	1.27128	1.04848	0.705594	0.281907	-0.174064	-0.610102	-0.976269	-1.23063	-1.34406	-1.30356	-1.11378	-0.796441	-0.387895	0.0650749	0.510592	0.897635	1.18188	1.33077	1.32726	1.17175	0.882045	0.491328	0.0443429	-0.40772	-0.81309	-1.12534	-1.30872	-1.34222	-1.222	-0.96184	-0.591526	-0.153469	0.302164	0.723192	1.0614	1.27805	1.34834	1.26421	1.0353	0.687829	0.261584	-0.194618
1.36221	36.7206	37.0245	1.04642				1.04642	0.986326	0.812942	0.546183	0.21669	-0.137692	-0.476259	-0.760122	-0.956679	-1.04335	-1.01019	-0.860991	-0.612903	-0.294417	0.0578857	0.40354	0.702843	0.921418	1.03416	1.02812	0.903988	0.676026	0.370416	0.02226	-0.328453	-0.641439	-0.880751	-1.0189	-1.04002	-0.941681	-0.735182	-0.444241	-0.102275	0.251438	0.576272	0.834915	0.99766	1.04581	0.973848	0.790025	0.51546	0.18169	-0.172949
1.36424	36.6204	36.9416	1.11236				1.11236	1.04829	0.863453	0.579152	0.228134	-0.149165	-0.509281	-0.810728	-1.01878	-1.10947	-1.07235	-0.911698	-0.646019	-0.305919	0.0694227	0.436767	0.753796	0.983988	1.10083	1.09085	0.955211	0.709532	0.382116	0.0106803	-0.361986	-0.692951	-0.94409	-1.08647	-1.10369	-0.993768	-0.769364	-0.45633	-0.0907278	0.285326	0.628511	0.899292	1.06648	1.1108	1.02717	0.825203	0.528176	0.170304	-0.207186
1.36626	36.45	36.9718	1.81808				1.81808	1.71305	1.4101	0.944236	0.369276	-0.24835	-0.837282	-1.32948	-1.66807	-1.81394	-1.75023	-1.4843	-1.04689	-0.488519	0.126293	0.726513	1.24279	1.61549	1.80153	1.77943	1.55174	1.14477	0.605537	-0.00366045	-0.612435	-1.15045	-1.55555	-1.78092	-1.80053	-1.61212	-1.23744	-0.719796	-0.118989	0.495567	1.05287	1.48852	1.7522	1.81343	1.66514	1.32447	0.830777	0.241096	-0.376441
1.36828	36.359	36.9219	1.97319				1.97319	1.85887	1.52915	1.02224	0.396878	-0.274474	-0.91402	-1.44765	-1.81354	-1.96928	-1.89683	-1.60459	-1.12641	-0.51771	0.150981	0.802177	1.36042	1.76102	1.95757	1.92728	1.67367	1.22612	0.63649	-0.0268906	-0.687155	-1.2678	-1.70153	-1.9381	-1.95009	-1.73611	-1.32096	-0.752748	-0.0973066	0.56941	1.17015	1.63529	1.91095	1.96517	1.79168	1.41058	0.866022	0.221118	-0.449408
1.3703	36.388	37.0334	2.2754				2.2754	2.14318	1.7619	1.17585	0.453159	-0.322199	-1.06011	-1.67483	-2.0949	-2.27152	-2.18415	-1.84296	-1.28758	-0.582573	0.19014	0.940757	1.58204	2.03947	2.25989	2.21767	1.91773	1.39492	0.709999	-0.0574327	-0.81819	-1.48386	-1.97709	-2.24055	-2.24362	-1.98596	-1.4975	-0.835003	-0.075471	0.692832	1.38062	1.90796	2.21356	2.26192	2.04741	1.59496	0.957158	0.208117	-0.56511
1.37233	36.6759	37.0559	1.34767				1.34767	1.26913	1.04267	0.694675	0.265715	-0.194216	-0.63151	-0.995198	-1.24289	-1.34572	-1.29169	-1.08711	-0.755826	-0.336443	0.122155	0.566514	0.944844	1.21305	1.33986	1.31051	1.12841	0.814786	0.406195	-0.0497391	-0.499876	-0.89175	-1.17969	-1.33012	-1.32553	-1.16643	-0.871383	-0.474771	-0.0228207	0.431789	0.836071	1.1429	1.31653	1.3367	1.20107	0.925454	0.541969	0.0953144	-0.36245
1.37435	36.5267	36.9761	1.60329				1.60329	1.50958	1.23941	0.824357	0.312939	-0.23506	-0.755582	-1.18778	-1.48113	-1.60134	-1.53437	-1.28803	-0.891129	-0.390058	0.15661	0.68497	1.13326	1.44908	1.5955	1.55542	1.33352	0.955735	0.466228	-0.0777786	-0.612693	-1.07599	-1.4135	-1.58579	-1.5727	-1.37577	-1.01802	-0.541265	-0.00124141	0.538927	1.0161	1.37449	1.57221	1.58615	1.41467	1.07783	0.614987	0.0802584	-0.463852
1.37637	36.373	36.6904	1.1391				1.1391	1.07233	0.87984	0.584204	0.220078	-0.169849	-0.539863	-0.846586	-1.05406	-1.13796	-1.08845	-0.911331	-0.627374	-0.269867	0.119279	0.494441	0.811637	1.03368	1.13454	1.10239	0.940997	0.669288	0.319114	-0.0684708	-0.448029	-0.775062	-1.01123	-1.12884	-1.11412	-0.968778	-0.709861	-0.367723	0.0175252	0.400719	0.736934	0.986754	1.12089	1.12362	0.994618	0.749012	0.415595	0.0334556	-0.352606
1.37839	36.4742	36.698	0.808064				0.808064	0.760559	0.62363	0.413376	0.154519	-0.122506	-0.385127	-0.602466	-0.748969	-0.80741	-0.770919	-0.643785	-0.440957	-0.186282	0.0902948	0.356255	0.580328	0.736168	0.805451	0.780032	0.662899	0.467824	0.217744	-0.0579376	-0.326807	-0.557252	-0.722177	-0.80219	-0.787884	-0.680941	-0.493935	-0.248854	0.0254867	0.296831	0.533275	0.707017	0.797631	0.794462	0.697882	0.519248	0.279562	0.00700537	-0.266375
1.38042	36.3791	36.7069	1.19026				1.19026	1.12008	0.917822	0.607335	0.22523	-0.183433	-0.570466	-0.890229	-1.10502	-1.1895	-1.13372	-0.944248	-0.643432	-0.266742	0.141402	0.532872	0.861506	1.08855	1.18723	1.14592	0.969474	0.678711	0.307914	-0.099192	-0.494601	-0.831687	-1.0707	-1.18346	-1.15666	-0.993469	-0.713128	-0.348695	0.0568556	0.455702	0.800812	1.05149	1.17818	1.16593	1.0162	0.746639	0.389034	-0.0144471	-0.416224
1.38244	36.4642	36.602	0.503345				0.503345	0.473582	0.387812	0.256178	0.0942486	-0.0788271	-0.24258	-0.377646	-0.46805	-0.503102	-0.478656	-0.397603	-0.269528	-0.109579	0.0633292	0.228748	0.367115	0.462066	0.502372	0.483266	0.407009	0.282618	0.124803	-0.0477701	-0.214694	-0.356228	-0.455634	-0.501156	-0.487409	-0.416021	-0.295433	-0.139907	0.0321648	0.200433	0.344997	0.448762	0.499455	0.491081	0.424631	0.307964	0.154876	-0.0165284	-0.185978
1.38446	36.4317	36.7222	1.0674				1.0674	1.0041	0.821712	0.541863	0.197747	-0.169823	-0.517251	-0.803331	-0.994132	-1.06702	-1.01336	-0.839513	-0.566092	-0.225531	0.14178	0.492275	0.784384	0.983461	1.0659	1.02191	0.856722	0.589922	0.253155	-0.113637	-0.466951	-0.764883	-0.972097	-1.06401	-1.02974	-0.873327	-0.613336	-0.280602	0.0854135	0.441298	0.744843	0.960046	1.06138	1.03684	0.889316	0.636318	0.30785	-0.0571299	-0.415334
1.38648	36.3744	36.7036	1.2168				1.2168	1.14443	0.935939	0.616117	0.223009	-0.196625	-0.592872	-0.918597	-1.13506	-1.21651	-1.15326	-0.952827	-0.639063	-0.249284	0.170147	0.569339	0.90081	1.12513	1.21562	1.16152	0.969254	0.6617	0.275438	-0.143586	-0.545531	-0.882587	-1.11466	-1.21415	-1.16922	-0.985211	-0.684016	-0.301459	0.116955	0.521459	0.863936	1.10365	1.21209	1.17635	1.00069	0.706001	0.327334	-0.0902682	-0.497133
1.38851	36.4186	36.8304	1.53064				1.53064	1.43934	1.17634	0.773013	0.277471	-0.251171	-0.74985	-1.15908	-1.43004	-1.5304	-1.4482	-1.19324	-0.795941	-0.303688	0.224794	0.726459	1.14146	1.4203	1.5297	1.45663	1.20979	0.818627	0.329811	-0.198348	-0.702846	-1.1235	-1.41013	-1.52854	-1.46461	-1.22596	-0.841063	-0.355835	0.171842	0.67902	1.1052	1.39953	1.52691	1.47214	1.24176	0.863244	0.38175	-0.145284	-0.654987
1.39053	36.3055	36.7223	1.55799				1.55799	1.4648	1.19636	0.784792	0.279335	-0.25954	-0.767365	-1.18338	-1.45783	-1.55786	-1.47152	-1.20913	-0.802088	-0.299084	0.239701	0.74981	1.17021	1.45062	1.55748	1.478	1.22171	0.819251	0.318783	-0.219823	-0.73213	-1.15685	-1.44317	-1.55683	-1.48424	-1.23408	-0.836278	-0.338429	0.199908	0.714329	1.14329	1.43547	1.55592	1.49022	1.24624	0.853166	0.358019	-0.179959	-0.696408
1.39255	36.142	36.5343	1.47524				1.47524	1.38674	1.13186	0.741173	0.261565	-0.249426	-0.73049	-1.12391	-1.38248	-1.47518	-1.39089	-1.13972	-0.751805	-0.273686	0.237269	0.719756	1.11589	1.37813	1.47503	1.39495	1.14751	0.762383	0.285789	-0.225095	-0.708972	-1.10779	-1.37369	-1.47477	-1.39891	-1.15521	-0.772909	-0.297871	0.212906	0.698138	1.09961	1.36915	1.47441	1.40278	1.16284	0.783381	0.309932	-0.200702	-0.687256
1.39457	36.0284	36.3736	1.30563				1.30563	1.22708	1.00088	0.65425	0.228897	-0.223998	-0.64994	-0.997678	-1.22537	-1.30562	-1.22877	-1.00407	-0.65855	-0.233793	0.219095	0.645621	0.994462	1.22364	1.30559	1.23044	1.00724	0.66284	0.238685	-0.21419	-0.641292	-0.991231	-1.2219	-1.30554	-1.2321	-1.0104	-0.667122	-0.243574	0.209281	0.636954	0.987986	1.22014	1.30548	1.23373	1.01354	0.671393	0.24846	-0.204369	-0.632607
1.3966	35.9627	36.3584	1.50518				1.50518	1.41436	1.15287	0.752261	0.260873	-0.261995	-0.753248	-1.1536	-1.41475	-1.50518	-1.41397	-1.15214	-0.751273	-0.25975	0.263118	0.754235	1.15434	1.41514	1.50518	1.41358	1.1514	0.750285	0.258627	-0.26424	-0.755221	-1.15507	-1.41553	-1.50518	-1.41319	-1.15067	-0.749297	-0.257504	0.265362	0.756207	1.1558	1.41592	1.50517	1.4128	1.14993	0.748308	0.256381	-0.266484	-0.757192
1.39862	36.0892	36.2519	0.622529				0.622529	0.584861	0.476413	0.310311	0.106656	-0.109907	-0.313168	-0.478531	-0.585983	-0.622521	-0.583722	-0.474282	-0.307445	-0.103402	0.113154	0.316017	0.480636	0.587089	0.622494	0.582566	0.472137	0.304571	0.100146	-0.116398	-0.318856	-0.482727	-0.588179	-0.622451	-0.581394	-0.469979	-0.301688	-0.0968868	0.119639	0.321687	0.484804	0.589252	0.622389	0.580206	0.467808	0.298796	0.0936248	-0.122877	-0.324508
1.40064	36.3282	36.4861	0.607737				0.607737	0.570858	0.464698	0.302139	0.102912	-0.108805	-0.307317	-0.468532	-0.572884	-0.607708	-0.568778	-0.460818	-0.296932	-0.097009	0.114688	0.312465	0.472321	0.574853	0.607619	0.566642	0.456894	0.291696	0.0910965	-0.120559	-0.317583	-0.476064	-0.576767	-0.607472	-0.564451	-0.452926	-0.286432	-0.0851752	0.126419	0.32267	0.479761	0.578625	0.607266	0.562206	0.448914	0.28114	0.0792456	-0.132266	-0.327726
1.40266	36.5718	36.4812	0				0	0	0	0	0	0	0	0	0	0	0	0	0	0	0	0	0	0	0	0	0	0	0	0	0	0	0	0	0	0	0	0	0	0	0	0	0	0	0	0	0	0	0
1.40469	36.5026	36.4871	0				0	0	0	0	0	0	0	0	0	0	0	0	0	0	0	0	0	0	0	0	0	0	0	0	0	0	0	0	0	0	0	0	0	0	0	0	0	0	0	0	0	0	0
1.40671	36.3084	36.4034	0.37196				0.37196	0.349195	0.283685	0.18345	0.06076	-0.0693679	-0.191005	-0.289261	-0.35211	-0.371857	-0.346087	-0.277953	-0.175795	-0.0521186	0.0779374	0.198453	0.294677	0.35483	0.371549	0.342788	0.272066	0.168042	0.0434484	-0.0864639	-0.205792	-0.29993	-0.357354	-0.371036	-0.339299	-0.26603	-0.160197	-0.0347542	0.0949426	0.213018	0.305018	0.359681	0.370317	0.335623	0.259847	0.152263	0.0260408	-0.103369	-0.220125
1.40873	36.2347	36.4102	0.691175				0.691175	0.648752	0.526691	0.339976	0.111527	-0.130613	-0.35672	-0.539037	-0.655184	-0.690903	-0.64181	-0.513932	-0.322965	-0.0923518	0.149598	0.373183	0.550958	0.6611	0.690088	0.634364	0.500767	0.305699	0.0731045	-0.168464	-0.389353	-0.562446	-0.666496	-0.68873	-0.626418	-0.487209	-0.288193	-0.0537997	0.187198	0.405216	0.573492	0.671368	0.686829	0.617979	0.473268	0.27046	0.0344525	-0.205785	-0.420761
1.41076	36.288	36.2897	0.00681304				0.00681304	0.00639368	0.00518721	0.00334217	0.00108569	-0.00130445	-0.00353401	-0.0053285	-0.00646702	-0.00680942	-0.00631353	-0.00504041	-0.00314678	-0.000865764	0.00152183	0.00372208	0.00546412	0.00653349	0.00679855	0.00622666	0.00488824	0.00294804	0.00064492	-0.00173759	-0.0039062	-0.00559393	-0.00659301	-0.00678045	-0.00613318	-0.00473087	-0.00274617	-0.000423391	0.00195151	0.00408616	0.00571778	0.00664551	0.00675514	0.00603316	0.00456847	0.00254137	0.000201411	-0.00216334	-0.00426177
1.41278	36.0948	36.1771	0.327987				0.327987	0.307741	0.249503	0.160462	0.0516118	-0.0636103	-0.170979	-0.25724	-0.311743	-0.32776	-0.303313	-0.241421	-0.149723	-0.0395421	0.075521	0.181261	0.264623	0.315316	0.327081	0.298467	0.233005	0.138778	0.0274177	-0.0873274	-0.191291	-0.27164	-0.318452	-0.325951	-0.293208	-0.224268	-0.127641	-0.0152555	0.0990132	0.201058	0.278281	0.321149	0.32437	0.287545	0.215221	0.116327	0.00307219	-0.110562	-0.210547
1.4148	36.2937	36.0892	0				0	0	0	0	0	0	0	0	0	0	0	0	0	0	0	0	0	0	0	0	0	0	0	0	0	0	0	0	0	0	0	0	0	0	0	0	0	0	0	0	0	0	0
1.41682	36.365	36.2057	0				0	0	0	0	0	0	0	0	0	0	0	0	0	0	0	0	0	0	0	0	0	0	0	0	0	0	0	0	0	0	0	0	0	0	0	0	0	0	0	0	0	0	0
1.41885	35.8848	36.1361	1.01845				1.01845	0.955045	0.772733	0.49421	0.154154	-0.205094	-0.538808	-0.805435	-0.971781	-1.01713	-0.935843	-0.738035	-0.448336	-0.102817	0.255505	0.582014	0.836058	0.986007	1.01319	0.914225	0.701432	0.401305	0.051213	-0.305255	-0.623717	-0.864522	-0.997687	-1.00663	-0.890246	-0.663017	-0.353238	0.00052268	0.354218	0.66381	0.890754	1.00679	0.997477	0.863969	0.622891	0.304258	-0.052257	-0.402266	-0.702189
1.42087	35.9158	36.0675	0.618183				0.618183	0.57959	0.468631	0.299159	0.0923351	-0.126018	-0.328637	-0.490222	-0.5906	-0.617236	-0.566805	-0.445604	-0.268765	-0.0583692	0.159315	0.357107	0.510311	0.599799	0.614397	0.552282	0.421211	0.237548	0.0242245	-0.192123	-0.384483	-0.528836	-0.60716	-0.609676	-0.536068	-0.395527	-0.205602	0.00999448	0.224343	0.41068	0.545741	0.612661	0.603086	0.51821	0.368631	0.173026	-0.0441828	-0.255875	-0.435619
1.42289	36.0811	36.0579	0				0	0	0	0	0	0	0	0	0	0	0	0	0	0	0	0	0	0	0	0	0	0	0	0	0	0	0	0	0	0	0	0	0	0	0	0	0	0	0	0	0	0	0
1.42491	36.3567	36.0192	0				0	0	0	0	0	0	0	0	0	0	0	0	0	0	0	0	0	0	0	0	0	0	0	0	0	0	0	0	0	0	0	0	0	0	0	0	0	0	0	0	0	0	0
1.42694	36.2839	36.0365	0				0	0	0	0	0	0	0	0	0	0	0	0	0	0	0	0	0	0	0	0	0	0	0	0	0	0	0	0	0	0	0	0	0	0	0	0	0	0	0	0	0	0	0
1.42896	36.059	35.9468	0				0	0	0	0	0	0	0	0	0	0	0	0	0	0	0	0	0	0	0	0	0	0	0	0	0	0	0	0	0	0	0	0	0	0	0	0	0	0	0	0	0	0	0
1.43098	36.0822	35.9465	0				0	0	0	0	0	0	0	0	0	0	0	0	0	0	0	0	0	0	0	0	0	0	0	0	0	0	0	0	0	0	0	0	0	0	0	0	0	0	0	0	0	0	0
1.433	35.9876	36.0486	0.257352				0.257352	0.241014	0.194072	0.122487	0.0353501	-0.0562758	-0.140756	-0.207364	-0.247641	-0.256474	-0.23274	-0.179455	-0.103382	-0.014183	0.0768173	0.158064	0.21924	0.252577	0.253844	0.222878	0.163612	0.0835713	-0.00708102	-0.0968343	-0.174292	-0.229619	-0.255789	-0.24948	-0.211494	-0.146652	-0.0631897	0.0282966	0.11619	0.18933	0.23843	0.257254	0.243414	0.198665	0.128691	0.0423766	-0.0493191	-0.134752	-0.203075
1.43503	36.1091	36.1035	0				0	0	0	0	0	0	0	0	0	0	0	0	0	0	0	0	0	0	0	0	0	0	0	0	0	0	0	0	0	0	0	0	0	0	0	0	0	0	0	0	0	0	0
1.43705	35.9725	35.9055	0				0	0	0	0	0	0	0	0	0	0	0	0	0	0	0	0	0	0	0	0	0	0	0	0	0	0	0	0	0	0	0	0	0	0	0	0	0	0	0	0	0	0	0
1.43907	35.8612	35.9496	0.37938				0.37938	0.355092	0.285336	0.179046	0.04983	-0.0857664	-0.210381	-0.308058	-0.36629	-0.377622	-0.340602	-0.25997	-0.146051	-0.0134316	0.120908	0.239766	0.327924	0.374093	0.372363	0.322955	0.232194	0.111703	-0.0230912	-0.154929	-0.266928	-0.34475	-0.378429	-0.363653	-0.302314	-0.202266	-0.0763188	0.0594001	0.187513	0.291617	0.358381	0.379257	0.351572	0.278871	0.170462	0.0402275	-0.0951583	-0.21836	-0.313602
1.44109	36.02	36.1003	0.346538				0.346538	0.32429	0.260404	0.163083	0.0448222	-0.0791938	-0.193041	-0.282103	-0.334943	-0.344776	-0.310341	-0.236059	-0.131467	-0.009995	0.11276	0.221038	0.300934	0.342191	0.339511	0.293238	0.209315	0.0985149	-0.0249338	-0.145181	-0.246787	-0.316706	-0.345961	-0.330795	-0.273155	-0.180442	-0.0645615	0.0596091	0.176126	0.270029	0.32926	0.346215	0.318716	0.250295	0.149736	0.0299517	-0.0936786	-0.205281	-0.290525
1.44312	36.0027	35.932	0				0	0	0	0	0	0	0	0	0	0	0	0	0	0	0	0	0	0	0	0	0	0	0	0	0	0	0	0	0	0	0	0	0	0	0	0	0	0	0	0	0	0	0
1.44514	35.9786	35.7257	0				0	0	0	0	0	0	0	0	0	0	0	0	0	0	0	0	0	0	0	0	0	0	0	0	0	0	0	0	0	0	0	0	0	0	0	0	0	0	0	0	0	0	0
1.44716	35.9478	35.5889	0				0	0	0	0	0	0	0	0	0	0	0	0	0	0	0	0	0	0	0	0	0	0	0	0	0	0	0	0	0	0	0	0	0	0	0	0	0	0	0	0	0	0	0
1.44918	36.0558	35.6969	0				0	0	0	0	0	0	0	0	0	0	0	0	0	0	0	0	0	0	0	0	0	0	0	0	0	0	0	0	0	0	0	0	0	0	0	0	0	0	0	0	0	0	0
1.45121	35.6932	35.7619	0.304704				0.304704	0.284869	0.227948	0.141351	0.0363516	-0.0733804	-0.173559	-0.251143	-0.29603	-0.302378	-0.26936	-0.201274	-0.106985	0.00123207	0.109289	0.203118	0.270503	0.302672	0.295437	0.249739	0.171528	0.0709864	-0.0387969	-0.143529	-0.229576	-0.285735	-0.304694	-0.283986	-0.226306	-0.139164	-0.0339039	0.0757696	0.175579	0.25253	0.296604	0.302064	0.268199	0.199418	0.104675	-0.00369614	-0.111586	-0.204948	-0.271629
1.45323	35.856	35.8191	0				0	0	0	0	0	0	0	0	0	0	0	0	0	0	0	0	0	0	0	0	0	0	0	0	0	0	0	0	0	0	0	0	0	0	0	0	0	0	0	0	0	0	0
1.45525	35.9207	35.8162	0				0	0	0	0	0	0	0	0	0	0	0	0	0	0	0	0	0	0	0	0	0	0	0	0	0	0	0	0	0	0	0	0	0	0	0	0	0	0	0	0	0	0	0
1.45727	35.9792	35.7265	0				0	0	0	0	0	0	0	0	0	0	0	0	0	0	0	0	0	0	0	0	0	0	0	0	0	0	0	0	0	0	0	0	0	0	0	0	0	0	0	0	0	0	0
1.4593	35.8365	35.7809	0				0	0	0	0	0	0	0	0	0	0	0	0	0	0	0	0	0	0	0	0	0	0	0	0	0	0	0	0	0	0	0	0	0	0	0	0	0	0	0	0	0	0	0
1.46132	35.7116	35.7848	0.333759				0.333759	0.311733	0.248562	0.152583	0.0364658	-0.0844649	-0.194247	-0.278391	-0.325791	-0.33019	-0.291008	-0.213416	-0.107656	0.0123133	0.130657	0.231756	0.302266	0.33288	0.319558	0.264059	0.173706	0.0604263	-0.0608289	-0.174055	-0.264309	-0.319676	-0.332851	-0.302092	-0.231462	-0.130281	-0.0119041	0.108044	0.213731	0.291208	0.330249	0.325702	0.278165	0.193914	0.0840687	-0.0368727	-0.152947	-0.248835	-0.311879
1.46334	35.7634	35.5449	0				0	0	0	0	0	0	0	0	0	0	0	0	0	0	0	0	0	0	0	0	0	0	0	0	0	0	0	0	0	0	0	0	0	0	0	0	0	0	0	0	0	0	0
1.46536	35.7791	35.4159	0				0	0	0	0	0	0	0	0	0	0	0	0	0	0	0	0	0	0	0	0	0	0	0	0	0	0	0	0	0	0	0	0	0	0	0	0	0	0	0	0	0	0	0
1.46739	35.6795	35.2756	0				0	0	0	0	0	0	0	0	0	0	0	0	0	0	0	0	0	0	0	0	0	0	0	0	0	0	0	0	0	0	0	0	0	0	0	0	0	0	0	0	0	0	0
1.46941	35.722	35.4248	0				0	0	0	0	0	0	0	0	0	0	0	0	0	0	0	0	0	0	0	0	0	0	0	0	0	0	0	0	0	0	0	0	0	0	0	0	0	0	0	0	0	0	0
1.47143	35.882	35.3586	0				0	0	0	0	0	0	0	0	0	0	0	0	0	0	0	0	0	0	0	0	0	0	0	0	0	0	0	0	0	0	0	0	0	0	0	0	0	0	0	0	0	0	0
1.47346	35.7693	35.4715	0				0	0	0	0	0	0	0	0	0	0	0	0	0	0	0	0	0	0	0	0	0	0	0	0	0	0	0	0	0	0	0	0	0	0	0	0	0	0	0	0	0	0	0
1.47548	35.8267	35.3522	0				0	0	0	0	0	0	0	0	0	0	0	0	0	0	0	0	0	0	0	0	0	0	0	0	0	0	0	0	0	0	0	0	0	0	0	0	0	0	0	0	0	0	0
1.4775	35.9112	35.2735	0				0	0	0	0	0	0	0	0	0	0	0	0	0	0	0	0	0	0	0	0	0	0	0	0	0	0	0	0	0	0	0	0	0	0	0	0	0	0	0	0	0	0	0
1.47952	35.8087	35.3683	0				0	0	0	0	0	0	0	0	0	0	0	0	0	0	0	0	0	0	0	0	0	0	0	0	0	0	0	0	0	0	0	0	0	0	0	0	0	0	0	0	0	0	0
1.48155	35.8706	35.4531	0				0	0	0	0	0	0	0	0	0	0	0	0	0	0	0	0	0	0	0	0	0	0	0	0	0	0	0	0	0	0	0	0	0	0	0	0	0	0	0	0	0	0	0
1.48357	36.0691	35.324	0				0	0	0	0	0	0	0	0	0	0	0	0	0	0	0	0	0	0	0	0	0	0	0	0	0	0	0	0	0	0	0	0	0	0	0	0	0	0	0	0	0	0	0
1.48559	35.8557	35.0822	0				0	0	0	0	0	0	0	0	0	0	0	0	0	0	0	0	0	0	0	0	0	0	0	0	0	0	0	0	0	0	0	0	0	0	0	0	0	0	0	0	0	0	0
1.48761	35.6262	34.9431	0				0	0	0	0	0	0	0	0	0	0	0	0	0	0	0	0	0	0	0	0	0	0	0	0	0	0	0	0	0	0	0	0	0	0	0	0	0	0	0	0	0	0	0
1.48964	35.5447	35.0731	0				0	0	0	0	0	0	0	0	0	0	0	0	0	0	0	0	0	0	0	0	0	0	0	0	0	0	0	0	0	0	0	0	0	0	0	0	0	0	0	0	0	0	0
1.49166	35.6657	35.0642	0				0	0	0	0	0	0	0	0	0	0	0	0	0	0	0	0	0	0	0	0	0	0	0	0	0	0	0	0	0	0	0	0	0	0	0	0	0	0	0	0	0	0	0
1.49368	35.896	35.1872	0				0	0	0	0	0	0	0	0	0	0	0	0	0	0	0	0	0	0	0	0	0	0	0	0	0	0	0	0	0	0	0	0	0	0	0	0	0	0	0	0	0	0	0
1.4957	35.9947	35.2281	0				0	0	0	0	0	0	0	0	0	0	0	0	0	0	0	0	0	0	0	0	0	0	0	0	0	0	0	0	0	0	0	0	0	0	0	0	0	0	0	0	0	0	0
1.49773	36.1059	35.3167	0				0	0	0	0	0	0	0	0	0	0	0	0	0	0	0	0	0	0	0	0	0	0	0	0	0	0	0	0	0	0	0	0	0	0	0	0	0	0	0	0	0	0	0
1.49975	35.8477	35.0824	0				0	0	0	0	0	0	0	0	0	0	0	0	0	0	0	0	0	0	0	0	0	0	0	0	0	0	0	0	0	0	0	0	0	0	0	0	0	0	0	0	0	0	0
1.50177	35.5332	34.9218	0				0	0	0	0	0	0	0	0	0	0	0	0	0	0	0	0	0	0	0	0	0	0	0	0	0	0	0	0	0	0	0	0	0	0	0	0	0	0	0	0	0	0	0
1.50379	35.5485	35.059	0				0	0	0	0	0	0	0	0	0	0	0	0	0	0	0	0	0	0	0	0	0	0	0	0	0	0	0	0	0	0	0	0	0	0	0	0	0	0	0	0	0	0	0
1.50582	35.5177	35.0487	0				0	0	0	0	0	0	0	0	0	0	0	0	0	0	0	0	0	0	0	0	0	0	0	0	0	0	0	0	0	0	0	0	0	0	0	0	0	0	0	0	0	0	0
1.50784	35.3362	35.0999	0				0	0	0	0	0	0	0	0	0	0	0	0	0	0	0	0	0	0	0	0	0	0	0	0	0	0	0	0	0	0	0	0	0	0	0	0	0	0	0	0	0	0	0
1.50986	35.478	35.397	0				0	0	0	0	0	0	0	0	0	0	0	0	0	0	0	0	0	0	0	0	0	0	0	0	0	0	0	0	0	0	0	0	0	0	0	0	0	0	0	0	0	0	0
1.51188	35.5634	35.3053	0				0	0	0	0	0	0	0	0	0	0	0	0	0	0	0	0	0	0	0	0	0	0	0	0	0	0	0	0	0	0	0	0	0	0	0	0	0	0	0	0	0	0	0
1.51391	35.5041	35.0898	0				0	0	0	0	0	0	0	0	0	0	0	0	0	0	0	0	0	0	0	0	0	0	0	0	0	0	0	0	0	0	0	0	0	0	0	0	0	0	0	0	0	0	0
1.51593	35.641	34.9237	0				0	0	0	0	0	0	0	0	0	0	0	0	0	0	0	0	0	0	0	0	0	0	0	0	0	0	0	0	0	0	0	0	0	0	0	0	0	0	0	0	0	0	0
1.51795	35.7128	34.9543	0				0	0	0	0	0	0	0	0	0	0	0	0	0	0	0	0	0	0	0	0	0	0	0	0	0	0	0	0	0	0	0	0	0	0	0	0	0	0	0	0	0	0	0
1.51997	35.6808	34.7552	0				0	0	0	0	0	0	0	0	0	0	0	0	0	0	0	0	0	0	0	0	0	0	0	0	0	0	0	0	0	0	0	0	0	0	0	0	0	0	0	0	0	0	0
1.522	35.7186	34.7215	0				0	0	0	0	0	0	0	0	0	0	0	0	0	0	0	0	0	0	0	0	0	0	0	0	0	0	0	0	0	0	0	0	0	0	0	0	0	0	0	0	0	0	0
1.52402	35.6448	35.0657	0				0	0	0	0	0	0	0	0	0	0	0	0	0	0	0	0	0	0	0	0	0	0	0	0	0	0	0	0	0	0	0	0	0	0	0	0	0	0	0	0	0	0	0
1.52604	35.5486	35.0725	0				0	0	0	0	0	0	0	0	0	0	0	0	0	0	0	0	0	0	0	0	0	0	0	0	0	0	0	0	0	0	0	0	0	0	0	0	0	0	0	0	0	0	0
1.52807	35.5174	34.8927	0				0	0	0	0	0	0	0	0	0	0	0	0	0	0	0	0	0	0	0	0	0	0	0	0	0	0	0	0	0	0	0	0	0	0	0	0	0	0	0	0	0	0	0
1.53009	35.5644	34.8456	0				0	0	0	0	0	0	0	0	0	0	0	0	0	0	0	0	0	0	0	0	0	0	0	0	0	0	0	0	0	0	0	0	0	0	0	0	0	0	0	0	0	0	0
1.53211	35.6591	35.0627	0				0	0	0	0	0	0	0	0	0	0	0	0	0	0	0	0	0	0	0	0	0	0	0	0	0	0	0	0	0	0	0	0	0	0	0	0	0	0	0	0	0	0	0
1.53413	35.6461	34.9616	0				0	0	0	0	0	0	0	0	0	0	0	0	0	0	0	0	0	0	0	0	0	0	0	0	0	0	0	0	0	0	0	0	0	0	0	0	0	0	0	0	0	0	0
1.53616	35.5728	34.7588	0				0	0	0	0	0	0	0	0	0	0	0	0	0	0	0	0	0	0	0	0	0	0	0	0	0	0	0	0	0	0	0	0	0	0	0	0	0	0	0	0	0	0	0
1.53818	35.6138	34.7202	0				0	0	0	0	0	0	0	0	0	0	0	0	0	0	0	0	0	0	0	0	0	0	0	0	0	0	0	0	0	0	0	0	0	0	0	0	0	0	0	0	0	0	0
1.5402	35.4931	34.5699	0				0	0	0	0	0	0	0	0	0	0	0	0	0	0	0	0	0	0	0	0	0	0	0	0	0	0	0	0	0	0	0	0	0	0	0	0	0	0	0	0	0	0	0
1.54222	35.2664	34.4909	0				0	0	0	0	0	0	0	0	0	0	0	0	0	0	0	0	0	0	0	0	0	0	0	0	0	0	0	0	0	0	0	0	0	0	0	0	0	0	0	0	0	0	0
1.54425	35.4607	34.6691	0				0	0	0	0	0	0	0	0	0	0	0	0	0	0	0	0	0	0	0	0	0	0	0	0	0	0	0	0	0	0	0	0	0	0	0	0	0	0	0	0	0	0	0
1.54627	35.6452	34.6639	0				0	0	0	0	0	0	0	0	0	0	0	0	0	0	0	0	0	0	0	0	0	0	0	0	0	0	0	0	0	0	0	0	0	0	0	0	0	0	0	0	0	0	0
1.54829	35.6287	34.6063	0				0	0	0	0	0	0	0	0	0	0	0	0	0	0	0	0	0	0	0	0	0	0	0	0	0	0	0	0	0	0	0	0	0	0	0	0	0	0	0	0	0	0	0
1.55031	35.6405	34.546	0				0	0	0	0	0	0	0	0	0	0	0	0	0	0	0	0	0	0	0	0	0	0	0	0	0	0	0	0	0	0	0	0	0	0	0	0	0	0	0	0	0	0	0
1.55234	35.4875	34.5809	0				0	0	0	0	0	0	0	0	0	0	0	0	0	0	0	0	0	0	0	0	0	0	0	0	0	0	0	0	0	0	0	0	0	0	0	0	0	0	0	0	0	0	0
1.55436	35.4696	34.6735	0				0	0	0	0	0	0	0	0	0	0	0	0	0	0	0	0	0	0	0	0	0	0	0	0	0	0	0	0	0	0	0	0	0	0	0	0	0	0	0	0	0	0	0
1.55638	35.4655	34.7213	0				0	0	0	0	0	0	0	0	0	0	0	0	0	0	0	0	0	0	0	0	0	0	0	0	0	0	0	0	0	0	0	0	0	0	0	0	0	0	0	0	0	0	0
1.5584	35.3359	34.4804	0				0	0	0	0	0	0	0	0	0	0	0	0	0	0	0	0	0	0	0	0	0	0	0	0	0	0	0	0	0	0	0	0	0	0	0	0	0	0	0	0	0	0	0
1.56043	35.4446	34.6411	0				0	0	0	0	0	0	0	0	0	0	0	0	0	0	0	0	0	0	0	0	0	0	0	0	0	0	0	0	0	0	0	0	0	0	0	0	0	0	0	0	0	0	0
1.56245	35.6613	34.7729	0				0	0	0	0	0	0	0	0	0	0	0	0	0	0	0	0	0	0	0	0	0	0	0	0	0	0	0	0	0	0	0	0	0	0	0	0	0	0	0	0	0	0	0
1.56447	35.5949	34.4187	0				0	0	0	0	0	0	0	0	0	0	0	0	0	0	0	0	0	0	0	0	0	0	0	0	0	0	0	0	0	0	0	0	0	0	0	0	0	0	0	0	0	0	0
1.56649	35.1139	34.4908	0				0	0	0	0	0	0	0	0	0	0	0	0	0	0	0	0	0	0	0	0	0	0	0	0	0	0	0	0	0	0	0	0	0	0	0	0	0	0	0	0	0	0	0
1.56852	35.0188	34.6539	0				0	0	0	0	0	0	0	0	0	0	0	0	0	0	0	0	0	0	0	0	0	0	0	0	0	0	0	0	0	0	0	0	0	0	0	0	0	0	0	0	0	0	0
1.57054	35.3653	34.3574	0				0	0	0	0	0	0	0	0	0	0	0	0	0	0	0	0	0	0	0	0	0	0	0	0	0	0	0	0	0	0	0	0	0	0	0	0	0	0	0	0	0	0	0
1.57256	35.3538	34.1765	0				0	0	0	0	0	0	0	0	0	0	0	0	0	0	0	0	0	0	0	0	0	0	0	0	0	0	0	0	0	0	0	0	0	0	0	0	0	0	0	0	0	0	0
1.57458	35.2841	34.2877	0				0	0	0	0	0	0	0	0	0	0	0	0	0	0	0	0	0	0	0	0	0	0	0	0	0	0	0	0	0	0	0	0	0	0	0	0	0	0	0	0	0	0	0
1.57661	35.3285	34.2576	0				0	0	0	0	0	0	0	0	0	0	0	0	0	0	0	0	0	0	0	0	0	0	0	0	0	0	0	0	0	0	0	0	0	0	0	0	0	0	0	0	0	0	0
1.57863	35.5569	34.2457	0				0	0	0	0	0	0	0	0	0	0	0	0	0	0	0	0	0	0	0	0	0	0	0	0	0	0	0	0	0	0	0	0	0	0	0	0	0	0	0	0	0	0	0
1.58065	35.6219	34.3875	0				0	0	0	0	0	0	0	0	0	0	0	0	0	0	0	0	0	0	0	0	0	0	0	0	0	0	0	0	0	0	0	0	0	0	0	0	0	0	0	0	0	0	0
1.58268	35.4147	34.4182	0				0	0	0	0	0	0	0	0	0	0	0	0	0	0	0	0	0	0	0	0	0	0	0	0	0	0	0	0	0	0	0	0	0	0	0	0	0	0	0	0	0	0	0
1.5847	35.2458	34.3357	0				0	0	0	0	0	0	0	0	0	0	0	0	0	0	0	0	0	0	0	0	0	0	0	0	0	0	0	0	0	0	0	0	0	0	0	0	0	0	0	0	0	0	0
1.58672	35.2709	34.3482	0				0	0	0	0	0	0	0	0	0	0	0	0	0	0	0	0	0	0	0	0	0	0	0	0	0	0	0	0	0	0	0	0	0	0	0	0	0	0	0	0	0	0	0
1.58874	35.51	34.0644	0				0	0	0	0	0	0	0	0	0	0	0	0	0	0	0	0	0	0	0	0	0	0	0	0	0	0	0	0	0	0	0	0	0	0	0	0	0	0	0	0	0	0	0
1.59077	35.4877	34.033	0				0	0	0	0	0	0	0	0	0	0	0	0	0	0	0	0	0	0	0	0	0	0	0	0	0	0	0	0	0	0	0	0	0	0	0	0	0	0	0	0	0	0	0
1.59279	35.2585	34.0704	0				0	0	0	0	0	0	0	0	0	0	0	0	0	0	0	0	0	0	0	0	0	0	0	0	0	0	0	0	0	0	0	0	0	0	0	0	0	0	0	0	0	0	0
1.59481	35.2125	34.0872	0				0	0	0	0	0	0	0	0	0	0	0	0	0	0	0	0	0	0	0	0	0	0	0	0	0	0	0	0	0	0	0	0	0	0	0	0	0	0	0	0	0	0	0
1.59683	35.1686	33.9234	0				0	0	0	0	0	0	0	0	0	0	0	0	0	0	0	0	0	0	0	0	0	0	0	0	0	0	0	0	0	0	0	0	0	0	0	0	0	0	0	0	0	0	0
1.59886	35.2415	33.8911	0				0	0	0	0	0	0	0	0	0	0	0	0	0	0	0	0	0	0	0	0	0	0	0	0	0	0	0	0	0	0	0	0	0	0	0	0	0	0	0	0	0	0	0
1.60088	35.133	33.9181	0				0	0	0	0	0	0	0	0	0	0	0	0	0	0	0	0	0	0	0	0	0	0	0	0	0	0	0	0	0	0	0	0	0	0	0	0	0	0	0	0	0	0	0
1.6029	35.1712	33.7465	0				0	0	0	0	0	0	0	0	0	0	0	0	0	0	0	0	0	0	0	0	0	0	0	0	0	0	0	0	0	0	0	0	0	0	0	0	0	0	0	0	0	0	0
1.60492	35.1062	33.8483	0				0	0	0	0	0	0	0	0	0	0	0	0	0	0	0	0	0	0	0	0	0	0	0	0	0	0	0	0	0	0	0	0	0	0	0	0	0	0	0	0	0	0	0
1.60695	35.0135	33.9828	0				0	0	0	0	0	0	0	0	0	0	0	0	0	0	0	0	0	0	0	0	0	0	0	0	0	0	0	0	0	0	0	0	0	0	0	0	0	0	0	0	0	0	0
1.60897	34.9119	34.0795	0				0	0	0	0	0	0	0	0	0	0	0	0	0	0	0	0	0	0	0	0	0	0	0	0	0	0	0	0	0	0	0	0	0	0	0	0	0	0	0	0	0	0	0
1.61099	35.2967	34.0891	0				0	0	0	0	0	0	0	0	0	0	0	0	0	0	0	0	0	0	0	0	0	0	0	0	0	0	0	0	0	0	0	0	0	0	0	0	0	0	0	0	0	0	0
1.61301	35.3855	34.0528	0				0	0	0	0	0	0	0	0	0	0	0	0	0	0	0	0	0	0	0	0	0	0	0	0	0	0	0	0	0	0	0	0	0	0	0	0	0	0	0	0	0	0	0
1.61504	35.3172	33.985	0				0	0	0	0	0	0	0	0	0	0	0	0	0	0	0	0	0	0	0	0	0	0	0	0	0	0	0	0	0	0	0	0	0	0	0	0	0	0	0	0	0	0	0
1.61706	35.257	34.0943	0				0	0	0	0	0	0	0	0	0	0	0	0	0	0	0	0	0	0	0	0	0	0	0	0	0	0	0	0	0	0	0	0	0	0	0	0	0	0	0	0	0	0	0
1.61908	35.0616	34.1639	0				0	0	0	0	0	0	0	0	0	0	0	0	0	0	0	0	0	0	0	0	0	0	0	0	0	0	0	0	0	0	0	0	0	0	0	0	0	0	0	0	0	0	0
1.6211	34.9385	33.8722	0				0	0	0	0	0	0	0	0	0	0	0	0	0	0	0	0	0	0	0	0	0	0	0	0	0	0	0	0	0	0	0	0	0	0	0	0	0	0	0	0	0	0	0
1.62313	35.1478	33.7936	0				0	0	0	0	0	0	0	0	0	0	0	0	0	0	0	0	0	0	0	0	0	0	0	0	0	0	0	0	0	0	0	0	0	0	0	0	0	0	0	0	0	0	0
1.62515	35.0859	33.7027	0				0	0	0	0	0	0	0	0	0	0	0	0	0	0	0	0	0	0	0	0	0	0	0	0	0	0	0	0	0	0	0	0	0	0	0	0	0	0	0	0	0	0	0
1.62717	34.8614	33.7881	0				0	0	0	0	0	0	0	0	0	0	0	0	0	0	0	0	0	0	0	0	0	0	0	0	0	0	0	0	0	0	0	0	0	0	0	0	0	0	0	0	0	0	0
1.62919	35.0301	33.8379	0				0	0	0	0	0	0	0	0	0	0	0	0	0	0	0	0	0	0	0	0	0	0	0	0	0	0	0	0	0	0	0	0	0	0	0	0	0	0	0	0	0	0	0
1.63122	34.9834	33.6986	0				0	0	0	0	0	0	0	0	0	0	0	0	0	0	0	0	0	0	0	0	0	0	0	0	0	0	0	0	0	0	0	0	0	0	0	0	0	0	0	0	0	0	0
1.63324	34.9338	33.8752	0				0	0	0	0	0	0	0	0	0	0	0	0	0	0	0	0	0	0	0	0	0	0	0	0	0	0	0	0	0	0	0	0	0	0	0	0	0	0	0	0	0	0	0
1.63526	34.9073	34.0618	0				0	0	0	0	0	0	0	0	0	0	0	0	0	0	0	0	0	0	0	0	0	0	0	0	0	0	0	0	0	0	0	0	0	0	0	0	0	0	0	0	0	0	0
1.63728	34.7901	33.9841	0				0	0	0	0	0	0	0	0	0	0	0	0	0	0	0	0	0	0	0	0	0	0	0	0	0	0	0	0	0	0	0	0	0	0	0	0	0	0	0	0	0	0	0
1.63931	34.8386	33.704	0				0	0	0	0	0	0	0	0	0	0	0	0	0	0	0	0	0	0	0	0	0	0	0	0	0	0	0	0	0	0	0	0	0	0	0	0	0	0	0	0	0	0	0
1.64133	34.7386	33.8993	0				0	0	0	0	0	0	0	0	0	0	0	0	0	0	0	0	0	0	0	0	0	0	0	0	0	0	0	0	0	0	0	0	0	0	0	0	0	0	0	0	0	0	0
1.64335	34.9805	33.7726	0				0	0	0	0	0	0	0	0	0	0	0	0	0	0	0	0	0	0	0	0	0	0	0	0	0	0	0	0	0	0	0	0	0	0	0	0	0	0	0	0	0	0	0
1.64538	35.2079	33.6269	0				0	0	0	0	0	0	0	0	0	0	0	0	0	0	0	0	0	0	0	0	0	0	0	0	0	0	0	0	0	0	0	0	0	0	0	0	0	0	0	0	0	0	0
1.6474	35.0275	33.4525	0				0	0	0	0	0	0	0	0	0	0	0	0	0	0	0	0	0	0	0	0	0	0	0	0	0	0	0	0	0	0	0	0	0	0	0	0	0	0	0	0	0	0	0
1.64942	35.0781	33.5296	0				0	0	0	0	0	0	0	0	0	0	0	0	0	0	0	0	0	0	0	0	0	0	0	0	0	0	0	0	0	0	0	0	0	0	0	0	0	0	0	0	0	0	0
1.65144	35.0599	33.7392	0				0	0	0	0	0	0	0	0	0	0	0	0	0	0	0	0	0	0	0	0	0	0	0	0	0	0	0	0	0	0	0	0	0	0	0	0	0	0	0	0	0	0	0
1.65347	34.8624	33.6814	0				0	0	0	0	0	0	0	0	0	0	0	0	0	0	0	0	0	0	0	0	0	0	0	0	0	0	0	0	0	0	0	0	0	0	0	0	0	0	0	0	0	0	0
1.65549	34.7693	33.5208	0				0	0	0	0	0	0	0	0	0	0	0	0	0	0	0	0	0	0	0	0	0	0	0	0	0	0	0	0	0	0	0	0	0	0	0	0	0	0	0	0	0	0	0
1.65751	34.9203	33.453	0				0	0	0	0	0	0	0	0	0	0	0	0	0	0	0	0	0	0	0	0	0	0	0	0	0	0	0	0	0	0	0	0	0	0	0	0	0	0	0	0	0	0	0
1.65953	35.1047	33.5466	0				0	0	0	0	0	0	0	0	0	0	0	0	0	0	0	0	0	0	0	0	0	0	0	0	0	0	0	0	0	0	0	0	0	0	0	0	0	0	0	0	0	0	0
1.66156	35.0935	33.6473	0				0	0	0	0	0	0	0	0	0	0	0	0	0	0	0	0	0	0	0	0	0	0	0	0	0	0	0	0	0	0	0	0	0	0	0	0	0	0	0	0	0	0	0
1.66358	35.074	33.5347	0				0	0	0	0	0	0	0	0	0	0	0	0	0	0	0	0	0	0	0	0	0	0	0	0	0	0	0	0	0	0	0	0	0	0	0	0	0	0	0	0	0	0	0
1.6656	34.9591	33.5267	0				0	0	0	0	0	0	0	0	0	0	0	0	0	0	0	0	0	0	0	0	0	0	0	0	0	0	0	0	0	0	0	0	0	0	0	0	0	0	0	0	0	0	0
1.66762	34.7759	33.4746	0				0	0	0	0	0	0	0	0	0	0	0	0	0	0	0	0	0	0	0	0	0	0	0	0	0	0	0	0	0	0	0	0	0	0	0	0	0	0	0	0	0	0	0
1.66965	34.7112	33.5424	0				0	0	0	0	0	0	0	0	0	0	0	0	0	0	0	0	0	0	0	0	0	0	0	0	0	0	0	0	0	0	0	0	0	0	0	0	0	0	0	0	0	0	0
1.67167	34.7143	33.6409	0				0	0	0	0	0	0	0	0	0	0	0	0	0	0	0	0	0	0	0	0	0	0	0	0	0	0	0	0	0	0	0	0	0	0	0	0	0	0	0	0	0	0	0
1.67369	34.743	33.5745	0				0	0	0	0	0	0	0	0	0	0	0	0	0	0	0	0	0	0	0	0	0	0	0	0	0	0	0	0	0	0	0	0	0	0	0	0	0	0	0	0	0	0	0
1.67571	34.8485	33.6208	0				0	0	0	0	0	0	0	0	0	0	0	0	0	0	0	0	0	0	0	0	0	0	0	0	0	0	0	0	0	0	0	0	0	0	0	0	0	0	0	0	0	0	0
1.67774	34.8651	33.5539	0				0	0	0	0	0	0	0	0	0	0	0	0	0	0	0	0	0	0	0	0	0	0	0	0	0	0	0	0	0	0	0	0	0	0	0	0	0	0	0	0	0	0	0
1.67976	34.9058	33.482	0				0	0	0	0	0	0	0	0	0	0	0	0	0	0	0	0	0	0	0	0	0	0	0	0	0	0	0	0	0	0	0	0	0	0	0	0	0	0	0	0	0	0	0
1.68178	34.8605	33.3709	0				0	0	0	0	0	0	0	0	0	0	0	0	0	0	0	0	0	0	0	0	0	0	0	0	0	0	0	0	0	0	0	0	0	0	0	0	0	0	0	0	0	0	0
1.6838	34.7888	33.2091	0				0	0	0	0	0	0	0	0	0	0	0	0	0	0	0	0	0	0	0	0	0	0	0	0	0	0	0	0	0	0	0	0	0	0	0	0	0	0	0	0	0	0	0
1.68583	34.7275	33.3759	0				0	0	0	0	0	0	0	0	0	0	0	0	0	0	0	0	0	0	0	0	0	0	0	0	0	0	0	0	0	0	0	0	0	0	0	0	0	0	0	0	0	0	0
1.68785	34.7985	33.4566	0				0	0	0	0	0	0	0	0	0	0	0	0	0	0	0	0	0	0	0	0	0	0	0	0	0	0	0	0	0	0	0	0	0	0	0	0	0	0	0	0	0	0	0
1.68987	34.9679	33.2577	0				0	0	0	0	0	0	0	0	0	0	0	0	0	0	0	0	0	0	0	0	0	0	0	0	0	0	0	0	0	0	0	0	0	0	0	0	0	0	0	0	0	0	0
1.69189	35.0802	33.1093	0				0	0	0	0	0	0	0	0	0	0	0	0	0	0	0	0	0	0	0	0	0	0	0	0	0	0	0	0	0	0	0	0	0	0	0	0	0	0	0	0	0	0	0
1.69392	34.9806	33.3916	0				0	0	0	0	0	0	0	0	0	0	0	0	0	0	0	0	0	0	0	0	0	0	0	0	0	0	0	0	0	0	0	0	0	0	0	0	0	0	0	0	0	0	0
1.69594	34.8501	33.473	0				0	0	0	0	0	0	0	0	0	0	0	0	0	0	0	0	0	0	0	0	0	0	0	0	0	0	0	0	0	0	0	0	0	0	0	0	0	0	0	0	0	0	0
1.69796	34.8004	33.3016	0				0	0	0	0	0	0	0	0	0	0	0	0	0	0	0	0	0	0	0	0	0	0	0	0	0	0	0	0	0	0	0	0	0	0	0	0	0	0	0	0	0	0	0
1.69999	34.6653	33.4447	0				0	0	0	0	0	0	0	0	0	0	0	0	0	0	0	0	0	0	0	0	0	0	0	0	0	0	0	0	0	0	0	0	0	0	0	0	0	0	0	0	0	0	0
1.70201	34.8861	33.463	0				0	0	0	0	0	0	0	0	0	0	0	0	0	0	0	0	0	0	0	0	0	0	0	0	0	0	0	0	0	0	0	0	0	0	0	0	0	0	0	0	0	0	0
1.70403	34.8832	33.4357	0				0	0	0	0	0	0	0	0	0	0	0	0	0	0	0	0	0	0	0	0	0	0	0	0	0	0	0	0	0	0	0	0	0	0	0	0	0	0	0	0	0	0	0
1.70605	34.6802	33.4717	0				0	0	0	0	0	0	0	0	0	0	0	0	0	0	0	0	0	0	0	0	0	0	0	0	0	0	0	0	0	0	0	0	0	0	0	0	0	0	0	0	0	0	0
1.70808	34.4728	33.3502	0				0	0	0	0	0	0	0	0	0	0	0	0	0	0	0	0	0	0	0	0	0	0	0	0	0	0	0	0	0	0	0	0	0	0	0	0	0	0	0	0	0	0	0
1.7101	34.5694	33.2428	0				0	0	0	0	0	0	0	0	0	0	0	0	0	0	0	0	0	0	0	0	0	0	0	0	0	0	0	0	0	0	0	0	0	0	0	0	0	0	0	0	0	0	0
1.71212	34.4308	33.296	0				0	0	0	0	0	0	0	0	0	0	0	0	0	0	0	0	0	0	0	0	0	0	0	0	0	0	0	0	0	0	0	0	0	0	0	0	0	0	0	0	0	0	0
1.71414	34.4032	33.0905	0				0	0	0	0	0	0	0	0	0	0	0	0	0	0	0	0	0	0	0	0	0	0	0	0	0	0	0	0	0	0	0	0	0	0	0	0	0	0	0	0	0	0	0
1.71617	34.7611	33.1589	0				0	0	0	0	0	0	0	0	0	0	0	0	0	0	0	0	0	0	0	0	0	0	0	0	0	0	0	0	0	0	0	0	0	0	0	0	0	0	0	0	0	0	0
1.71819	34.6158	32.9499	0				0	0	0	0	0	0	0	0	0	0	0	0	0	0	0	0	0	0	0	0	0	0	0	0	0	0	0	0	0	0	0	0	0	0	0	0	0	0	0	0	0	0	0
1.72021	34.482	33.0114	0				0	0	0	0	0	0	0	0	0	0	0	0	0	0	0	0	0	0	0	0	0	0	0	0	0	0	0	0	0	0	0	0	0	0	0	0	0	0	0	0	0	0	0
1.72223	34.5052	33.0255	0				0	0	0	0	0	0	0	0	0	0	0	0	0	0	0	0	0	0	0	0	0	0	0	0	0	0	0	0	0	0	0	0	0	0	0	0	0	0	0	0	0	0	0
1.72426	34.5525	32.9673	0				0	0	0	0	0	0	0	0	0	0	0	0	0	0	0	0	0	0	0	0	0	0	0	0	0	0	0	0	0	0	0	0	0	0	0	0	0	0	0	0	0	0	0
1.72628	34.6287	32.9612	0				0	0	0	0	0	0	0	0	0	0	0	0	0	0	0	0	0	0	0	0	0	0	0	0	0	0	0	0	0	0	0	0	0	0	0	0	0	0	0	0	0	0	0
1.7283	34.5623	32.975	0				0	0	0	0	0	0	0	0	0	0	0	0	0	0	0	0	0	0	0	0	0	0	0	0	0	0	0	0	0	0	0	0	0	0	0	0	0	0	0	0	0	0	0
1.73032	34.5509	33.0656	0				0	0	0	0	0	0	0	0	0	0	0	0	0	0	0	0	0	0	0	0	0	0	0	0	0	0	0	0	0	0	0	0	0	0	0	0	0	0	0	0	0	0	0
1.73235	34.6014	32.9371	0				0	0	0	0	0	0	0	0	0	0	0	0	0	0	0	0	0	0	0	0	0	0	0	0	0	0	0	0	0	0	0	0	0	0	0	0	0	0	0	0	0	0	0
1.73437	34.5063	33.0403	0				0	0	0	0	0	0	0	0	0	0	0	0	0	0	0	0	0	0	0	0	0	0	0	0	0	0	0	0	0	0	0	0	0	0	0	0	0	0	0	0	0	0	0
1.73639	34.6441	33.1713	0				0	0	0	0	0	0	0	0	0	0	0	0	0	0	0	0	0	0	0	0	0	0	0	0	0	0	0	0	0	0	0	0	0	0	0	0	0	0	0	0	0	0	0
1.73841	34.6832	33.0714	0				0	0	0	0	0	0	0	0	0	0	0	0	0	0	0	0	0	0	0	0	0	0	0	0	0	0	0	0	0	0	0	0	0	0	0	0	0	0	0	0	0	0	0
1.74044	34.6906	32.9253	0				0	0	0	0	0	0	0	0	0	0	0	0	0	0	0	0	0	0	0	0	0	0	0	0	0	0	0	0	0	0	0	0	0	0	0	0	0	0	0	0	0	0	0
1.74246	34.5056	32.9636	0				0	0	0	0	0	0	0	0	0	0	0	0	0	0	0	0	0	0	0	0	0	0	0	0	0	0	0	0	0	0	0	0	0	0	0	0	0	0	0	0	0	0	0
1.74448	34.4963	32.9194	0				0	0	0	0	0	0	0	0	0	0	0	0	0	0	0	0	0	0	0	0	0	0	0	0	0	0	0	0	0	0	0	0	0	0	0	0	0	0	0	0	0	0	0
1.7465	34.5771	33.0068	0				0	0	0	0	0	0	0	0	0	0	0	0	0	0	0	0	0	0	0	0	0	0	0	0	0	0	0	0	0	0	0	0	0	0	0	0	0	0	0	0	0	0	0
1.74853	34.5356	32.9579	0				0	0	0	0	0	0	0	0	0	0	0	0	0	0	0	0	0	0	0	0	0	0	0	0	0	0	0	0	0	0	0	0	0	0	0	0	0	0	0	0	0	0	0
1.75055	34.481	32.914	0				0	0	0	0	0	0	0	0	0	0	0	0	0	0	0	0	0	0	0	0	0	0	0	0	0	0	0	0	0	0	0	0	0	0	0	0	0	0	0	0	0	0	0
1.75257	34.4397	32.9286	0				0	0	0	0	0	0	0	0	0	0	0	0	0	0	0	0	0	0	0	0	0	0	0	0	0	0	0	0	0	0	0	0	0	0	0	0	0	0	0	0	0	0	0
1.7546	34.3088	32.9944	0				0	0	0	0	0	0	0	0	0	0	0	0	0	0	0	0	0	0	0	0	0	0	0	0	0	0	0	0	0	0	0	0	0	0	0	0	0	0	0	0	0	0	0
1.75662	34.3677	33.0376	0				0	0	0	0	0	0	0	0	0	0	0	0	0	0	0	0	0	0	0	0	0	0	0	0	0	0	0	0	0	0	0	0	0	0	0	0	0	0	0	0	0	0	0
1.75864	34.5325	32.9558	0				0	0	0	0	0	0	0	0	0	0	0	0	0	0	0	0	0	0	0	0	0	0	0	0	0	0	0	0	0	0	0	0	0	0	0	0	0	0	0	0	0	0	0
1.76066	34.6146	32.7523	0				0	0	0	0	0	0	0	0	0	0	0	0	0	0	0	0	0	0	0	0	0	0	0	0	0	0	0	0	0	0	0	0	0	0	0	0	0	0	0	0	0	0	0
1.76269	34.5613	32.7688	0				0	0	0	0	0	0	0	0	0	0	0	0	0	0	0	0	0	0	0	0	0	0	0	0	0	0	0	0	0	0	0	0	0	0	0	0	0	0	0	0	0	0	0
1.76471	34.4903	32.8096	0				0	0	0	0	0	0	0	0	0	0	0	0	0	0	0	0	0	0	0	0	0	0	0	0	0	0	0	0	0	0	0	0	0	0	0	0	0	0	0	0	0	0	0
1.76673	34.4177	32.677	0				0	0	0	0	0	0	0	0	0	0	0	0	0	0	0	0	0	0	0	0	0	0	0	0	0	0	0	0	0	0	0	0	0	0	0	0	0	0	0	0	0	0	0
1.76875	34.3302	32.6988	0				0	0	0	0	0	0	0	0	0	0	0	0	0	0	0	0	0	0	0	0	0	0	0	0	0	0	0	0	0	0	0	0	0	0	0	0	0	0	0	0	0	0	0
1.77078	34.3016	32.7013	0				0	0	0	0	0	0	0	0	0	0	0	0	0	0	0	0	0	0	0	0	0	0	0	0	0	0	0	0	0	0	0	0	0	0	0	0	0	0	0	0	0	0	0
1.7728	34.3864	32.7826	0				0	0	0	0	0	0	0	0	0	0	0	0	0	0	0	0	0	0	0	0	0	0	0	0	0	0	0	0	0	0	0	0	0	0	0	0	0	0	0	0	0	0	0
1.77482	34.4019	32.9892	0				0	0	0	0	0	0	0	0	0	0	0	0	0	0	0	0	0	0	0	0	0	0	0	0	0	0	0	0	0	0	0	0	0	0	0	0	0	0	0	0	0	0	0
1.77684	34.3653	33.0279	0				0	0	0	0	0	0	0	0	0	0	0	0	0	0	0	0	0	0	0	0	0	0	0	0	0	0	0	0	0	0	0	0	0	0	0	0	0	0	0	0	0	0	0
1.77887	34.3914	32.976	0				0	0	0	0	0	0	0	0	0	0	0	0	0	0	0	0	0	0	0	0	0	0	0	0	0	0	0	0	0	0	0	0	0	0	0	0	0	0	0	0	0	0	0
1.78089	34.449	32.7349	0				0	0	0	0	0	0	0	0	0	0	0	0	0	0	0	0	0	0	0	0	0	0	0	0	0	0	0	0	0	0	0	0	0	0	0	0	0	0	0	0	0	0	0
1.78291	34.5352	32.6152	0				0	0	0	0	0	0	0	0	0	0	0	0	0	0	0	0	0	0	0	0	0	0	0	0	0	0	0	0	0	0	0	0	0	0	0	0	0	0	0	0	0	0	0
1.78493	34.3446	32.7799	0				0	0	0	0	0	0	0	0	0	0	0	0	0	0	0	0	0	0	0	0	0	0	0	0	0	0	0	0	0	0	0	0	0	0	0	0	0	0	0	0	0	0	0
1.78696	34.2722	32.7184	0				0	0	0	0	0	0	0	0	0	0	0	0	0	0	0	0	0	0	0	0	0	0	0	0	0	0	0	0	0	0	0	0	0	0	0	0	0	0	0	0	0	0	0
1.78898	34.293	32.8091	0				0	0	0	0	0	0	0	0	0	0	0	0	0	0	0	0	0	0	0	0	0	0	0	0	0	0	0	0	0	0	0	0	0	0	0	0	0	0	0	0	0	0	0
1.791	34.3059	33.0153	0				0	0	0	0	0	0	0	0	0	0	0	0	0	0	0	0	0	0	0	0	0	0	0	0	0	0	0	0	0	0	0	0	0	0	0	0	0	0	0	0	0	0	0
1.79302	34.3545	32.8994	0				0	0	0	0	0	0	0	0	0	0	0	0	0	0	0	0	0	0	0	0	0	0	0	0	0	0	0	0	0	0	0	0	0	0	0	0	0	0	0	0	0	0	0
1.79505	34.2966	32.8395	0				0	0	0	0	0	0	0	0	0	0	0	0	0	0	0	0	0	0	0	0	0	0	0	0	0	0	0	0	0	0	0	0	0	0	0	0	0	0	0	0	0	0	0
1.79707	34.2708	32.6532	0				0	0	0	0	0	0	0	0	0	0	0	0	0	0	0	0	0	0	0	0	0	0	0	0	0	0	0	0	0	0	0	0	0	0	0	0	0	0	0	0	0	0	0
1.79909	34.2184	32.5888	0				0	0	0	0	0	0	0	0	0	0	0	0	0	0	0	0	0	0	0	0	0	0	0	0	0	0	0	0	0	0	0	0	0	0	0	0	0	0	0	0	0	0	0
1.80111	34.079	32.6568	0				0	0	0	0	0	0	0	0	0	0	0	0	0	0	0	0	0	0	0	0	0	0	0	0	0	0	0	0	0	0	0	0	0	0	0	0	0	0	0	0	0	0	0
1.80314	34.2096	32.5051	0				0	0	0	0	0	0	0	0	0	0	0	0	0	0	0	0	0	0	0	0	0	0	0	0	0	0	0	0	0	0	0	0	0	0	0	0	0	0	0	0	0	0	0
1.80516	34.3348	32.4586	0				0	0	0	0	0	0	0	0	0	0	0	0	0	0	0	0	0	0	0	0	0	0	0	0	0	0	0	0	0	0	0	0	0	0	0	0	0	0	0	0	0	0	0
1.80718	34.251	32.7292	0				0	0	0	0	0	0	0	0	0	0	0	0	0	0	0	0	0	0	0	0	0	0	0	0	0	0	0	0	0	0	0	0	0	0	0	0	0	0	0	0	0	0	0
1.8092	34.2052	32.6175	0				0	0	0	0	0	0	0	0	0	0	0	0	0	0	0	0	0	0	0	0	0	0	0	0	0	0	0	0	0	0	0	0	0	0	0	0	0	0	0	0	0	0	0
1.81123	34.2559	32.606	0				0	0	0	0	0	0	0	0	0	0	0	0	0	0	0	0	0	0	0	0	0	0	0	0	0	0	0	0	0	0	0	0	0	0	0	0	0	0	0	0	0	0	0
1.81325	34.2842	32.5314	0				0	0	0	0	0	0	0	0	0	0	0	0	0	0	0	0	0	0	0	0	0	0	0	0	0	0	0	0	0	0	0	0	0	0	0	0	0	0	0	0	0	0	0
1.81527	34.3557	32.4664	0				0	0	0	0	0	0	0	0	0	0	0	0	0	0	0	0	0	0	0	0	0	0	0	0	0	0	0	0	0	0	0	0	0	0	0	0	0	0	0	0	0	0	0
1.8173	34.3817	32.426	0				0	0	0	0	0	0	0	0	0	0	0	0	0	0	0	0	0	0	0	0	0	0	0	0	0	0	0	0	0	0	0	0	0	0	0	0	0	0	0	0	0	0	0
1.81932	34.3254	32.365	0				0	0	0	0	0	0	0	0	0	0	0	0	0	0	0	0	0	0	0	0	0	0	0	0	0	0	0	0	0	0	0	0	0	0	0	0	0	0	0	0	0	0	0
1.82134	34.3487	32.3591	0				0	0	0	0	0	0	0	0	0	0	0	0	0	0	0	0	0	0	0	0	0	0	0	0	0	0	0	0	0	0	0	0	0	0	0	0	0	0	0	0	0	0	0
1.82336	34.3899	32.4524	0				0	0	0	0	0	0	0	0	0	0	0	0	0	0	0	0	0	0	0	0	0	0	0	0	0	0	0	0	0	0	0	0	0	0	0	0	0	0	0	0	0	0	0
1.82539	34.2695	32.409	0				0	0	0	0	0	0	0	0	0	0	0	0	0	0	0	0	0	0	0	0	0	0	0	0	0	0	0	0	0	0	0	0	0	0	0	0	0	0	0	0	0	0	0
1.82741	34.3189	32.365	0				0	0	0	0	0	0	0	0	0	0	0	0	0	0	0	0	0	0	0	0	0	0	0	0	0	0	0	0	0	0	0	0	0	0	0	0	0	0	0	0	0	0	0
1.82943	34.2674	32.4319	0				0	0	0	0	0	0	0	0	0	0	0	0	0	0	0	0	0	0	0	0	0	0	0	0	0	0	0	0	0	0	0	0	0	0	0	0	0	0	0	0	0	0	0
1.83145	34.1361	32.5802	0				0	0	0	0	0	0	0	0	0	0	0	0	0	0	0	0	0	0	0	0	0	0	0	0	0	0	0	0	0	0	0	0	0	0	0	0	0	0	0	0	0	0	0
1.83348	34.1283	32.6507	0				0	0	0	0	0	0	0	0	0	0	0	0	0	0	0	0	0	0	0	0	0	0	0	0	0	0	0	0	0	0	0	0	0	0	0	0	0	0	0	0	0	0	0
1.8355	34.2997	32.4739	0				0	0	0	0	0	0	0	0	0	0	0	0	0	0	0	0	0	0	0	0	0	0	0	0	0	0	0	0	0	0	0	0	0	0	0	0	0	0	0	0	0	0	0
1.83752	34.391	32.2507	0				0	0	0	0	0	0	0	0	0	0	0	0	0	0	0	0	0	0	0	0	0	0	0	0	0	0	0	0	0	0	0	0	0	0	0	0	0	0	0	0	0	0	0
1.83954	34.4408	32.2906	0				0	0	0	0	0	0	0	0	0	0	0	0	0	0	0	0	0	0	0	0	0	0	0	0	0	0	0	0	0	0	0	0	0	0	0	0	0	0	0	0	0	0	0
1.84157	34.3394	32.3669	0				0	0	0	0	0	0	0	0	0	0	0	0	0	0	0	0	0	0	0	0	0	0	0	0	0	0	0	0	0	0	0	0	0	0	0	0	0	0	0	0	0	0	0
1.84359	34.2852	32.3614	0				0	0	0	0	0	0	0	0	0	0	0	0	0	0	0	0	0	0	0	0	0	0	0	0	0	0	0	0	0	0	0	0	0	0	0	0	0	0	0	0	0	0	0
1.84561	34.3183	32.1627	0				0	0	0	0	0	0	0	0	0	0	0	0	0	0	0	0	0	0	0	0	0	0	0	0	0	0	0	0	0	0	0	0	0	0	0	0	0	0	0	0	0	0	0
1.84763	34.3111	32.1529	0				0	0	0	0	0	0	0	0	0	0	0	0	0	0	0	0	0	0	0	0	0	0	0	0	0	0	0	0	0	0	0	0	0	0	0	0	0	0	0	0	0	0	0
1.84966	34.1985	32.1073	0				0	0	0	0	0	0	0	0	0	0	0	0	0	0	0	0	0	0	0	0	0	0	0	0	0	0	0	0	0	0	0	0	0	0	0	0	0	0	0	0	0	0	0
1.85168	34.1028	32.054	0				0	0	0	0	0	0	0	0	0	0	0	0	0	0	0	0	0	0	0	0	0	0	0	0	0	0	0	0	0	0	0	0	0	0	0	0	0	0	0	0	0	0	0
1.8537	34.1834	32.0293	0				0	0	0	0	0	0	0	0	0	0	0	0	0	0	0	0	0	0	0	0	0	0	0	0	0	0	0	0	0	0	0	0	0	0	0	0	0	0	0	0	0	0	0
1.85572	34.106	32.23	0				0	0	0	0	0	0	0	0	0	0	0	0	0	0	0	0	0	0	0	0	0	0	0	0	0	0	0	0	0	0	0	0	0	0	0	0	0	0	0	0	0	0	0
1.85775	33.9249	32.4369	0				0	0	0	0	0	0	0	0	0	0	0	0	0	0	0	0	0	0	0	0	0	0	0	0	0	0	0	0	0	0	0	0	0	0	0	0	0	0	0	0	0	0	0
1.85977	33.9554	32.4197	0				0	0	0	0	0	0	0	0	0	0	0	0	0	0	0	0	0	0	0	0	0	0	0	0	0	0	0	0	0	0	0	0	0	0	0	0	0	0	0	0	0	0	0
1.86179	34.2708	32.1812	0				0	0	0	0	0	0	0	0	0	0	0	0	0	0	0	0	0	0	0	0	0	0	0	0	0	0	0	0	0	0	0	0	0	0	0	0	0	0	0	0	0	0	0
1.86381	34.2312	32.2767	0				0	0	0	0	0	0	0	0	0	0	0	0	0	0	0	0	0	0	0	0	0	0	0	0	0	0	0	0	0	0	0	0	0	0	0	0	0	0	0	0	0	0	0
1.86584	34.0569	32.1622	0				0	0	0	0	0	0	0	0	0	0	0	0	0	0	0	0	0	0	0	0	0	0	0	0	0	0	0	0	0	0	0	0	0	0	0	0	0	0	0	0	0	0	0
1.86786	34.0901	32.0641	0				0	0	0	0	0	0	0	0	0	0	0	0	0	0	0	0	0	0	0	0	0	0	0	0	0	0	0	0	0	0	0	0	0	0	0	0	0	0	0	0	0	0	0
1.86988	34.137	32.189	0				0	0	0	0	0	0	0	0	0	0	0	0	0	0	0	0	0	0	0	0	0	0	0	0	0	0	0	0	0	0	0	0	0	0	0	0	0	0	0	0	0	0	0
1.87191	34.1339	32.1846	0				0	0	0	0	0	0	0	0	0	0	0	0	0	0	0	0	0	0	0	0	0	0	0	0	0	0	0	0	0	0	0	0	0	0	0	0	0	0	0	0	0	0	0
1.87393	34.1267	32.1057	0				0	0	0	0	0	0	0	0	0	0	0	0	0	0	0	0	0	0	0	0	0	0	0	0	0	0	0	0	0	0	0	0	0	0	0	0	0	0	0	0	0	0	0
1.87595	34.0116	32.1388	0				0	0	0	0	0	0	0	0	0	0	0	0	0	0	0	0	0	0	0	0	0	0	0	0	0	0	0	0	0	0	0	0	0	0	0	0	0	0	0	0	0	0	0
1.87797	34.0122	32.2442	0				0	0	0	0	0	0	0	0	0	0	0	0	0	0	0	0	0	0	0	0	0	0	0	0	0	0	0	0	0	0	0	0	0	0	0	0	0	0	0	0	0	0	0
1.88	33.9596	32.1822	0				0	0	0	0	0	0	0	0	0	0	0	0	0	0	0	0	0	0	0	0	0	0	0	0	0	0	0	0	0	0	0	0	0	0	0	0	0	0	0	0	0	0	0
1.88202	34.0469	32.1888	0				0	0	0	0	0	0	0	0	0	0	0	0	0	0	0	0	0	0	0	0	0	0	0	0	0	0	0	0	0	0	0	0	0	0	0	0	0	0	0	0	0	0	0
1.88404	33.8754	32.0239	0				0	0	0	0	0	0	0	0	0	0	0	0	0	0	0	0	0	0	0	0	0	0	0	0	0	0	0	0	0	0	0	0	0	0	0	0	0	0	0	0	0	0	0
1.88606	33.713	31.9499	0				0	0	0	0	0	0	0	0	0	0	0	0	0	0	0	0	0	0	0	0	0	0	0	0	0	0	0	0	0	0	0	0	0	0	0	0	0	0	0	0	0	0	0
1.88809	33.9325	31.8181	0				0	0	0	0	0	0	0	0	0	0	0	0	0	0	0	0	0	0	0	0	0	0	0	0	0	0	0	0	0	0	0	0	0	0	0	0	0	0	0	0	0	0	0
1.89011	34.1025	31.9148	0				0	0	0	0	0	0	0	0	0	0	0	0	0	0	0	0	0	0	0	0	0	0	0	0	0	0	0	0	0	0	0	0	0	0	0	0	0	0	0	0	0	0	0
1.89213	33.9978	31.9609	0				0	0	0	0	0	0	0	0	0	0	0	0	0	0	0	0	0	0	0	0	0	0	0	0	0	0	0	0	0	0	0	0	0	0	0	0	0	0	0	0	0	0	0
1.89415	33.8745	31.9662	0				0	0	0	0	0	0	0	0	0	0	0	0	0	0	0	0	0	0	0	0	0	0	0	0	0	0	0	0	0	0	0	0	0	0	0	0	0	0	0	0	0	0	0
1.89618	33.8423	31.9468	0				0	0	0	0	0	0	0	0	0	0	0	0	0	0	0	0	0	0	0	0	0	0	0	0	0	0	0	0	0	0	0	0	0	0	0	0	0	0	0	0	0	0	0
1.8982	33.8971	31.9991	0				0	0	0	0	0	0	0	0	0	0	0	0	0	0	0	0	0	0	0	0	0	0	0	0	0	0	0	0	0	0	0	0	0	0	0	0	0	0	0	0	0	0	0
1.90022	34.0042	32.1737	0				0	0	0	0	0	0	0	0	0	0	0	0	0	0	0	0	0	0	0	0	0	0	0	0	0	0	0	0	0	0	0	0	0	0	0	0	0	0	0	0	0	0	0
1.90224	34.1053	32.1425	0				0	0	0	0	0	0	0	0	0	0	0	0	0	0	0	0	0	0	0	0	0	0	0	0	0	0	0	0	0	0	0	0	0	0	0	0	0	0	0	0	0	0	0
1.90427	33.9158	32.0773	0				0	0	0	0	0	0	0	0	0	0	0	0	0	0	0	0	0	0	0	0	0	0	0	0	0	0	0	0	0	0	0	0	0	0	0	0	0	0	0	0	0	0	0
1.90629	33.8851	31.964	0				0	0	0	0	0	0	0	0	0	0	0	0	0	0	0	0	0	0	0	0	0	0	0	0	0	0	0	0	0	0	0	0	0	0	0	0	0	0	0	0	0	0	0
1.90831	33.8296	31.9097	0				0	0	0	0	0	0	0	0	0	0	0	0	0	0	0	0	0	0	0	0	0	0	0	0	0	0	0	0	0	0	0	0	0	0	0	0	0	0	0	0	0	0	0
1.91033	33.9285	31.9077	0				0	0	0	0	0	0	0	0	0	0	0	0	0	0	0	0	0	0	0	0	0	0	0	0	0	0	0	0	0	0	0	0	0	0	0	0	0	0	0	0	0	0	0
1.91236	33.9547	31.8877	0				0	0	0	0	0	0	0	0	0	0	0	0	0	0	0	0	0	0	0	0	0	0	0	0	0	0	0	0	0	0	0	0	0	0	0	0	0	0	0	0	0	0	0
1.91438	33.842	31.7572	0				0	0	0	0	0	0	0	0	0	0	0	0	0	0	0	0	0	0	0	0	0	0	0	0	0	0	0	0	0	0	0	0	0	0	0	0	0	0	0	0	0	0	0
1.9164	33.796	31.6661	0				0	0	0	0	0	0	0	0	0	0	0	0	0	0	0	0	0	0	0	0	0	0	0	0	0	0	0	0	0	0	0	0	0	0	0	0	0	0	0	0	0	0	0
1.91842	33.8046	31.7898	0				0	0	0	0	0	0	0	0	0	0	0	0	0	0	0	0	0	0	0	0	0	0	0	0	0	0	0	0	0	0	0	0	0	0	0	0	0	0	0	0	0	0	0
1.92045	33.8267	32.1044	0				0	0	0	0	0	0	0	0	0	0	0	0	0	0	0	0	0	0	0	0	0	0	0	0	0	0	0	0	0	0	0	0	0	0	0	0	0	0	0	0	0	0	0
1.92247	33.7837	32.1943	0				0	0	0	0	0	0	0	0	0	0	0	0	0	0	0	0	0	0	0	0	0	0	0	0	0	0	0	0	0	0	0	0	0	0	0	0	0	0	0	0	0	0	0
1.92449	33.8332	32.0888	0				0	0	0	0	0	0	0	0	0	0	0	0	0	0	0	0	0	0	0	0	0	0	0	0	0	0	0	0	0	0	0	0	0	0	0	0	0	0	0	0	0	0	0
1.92652	33.9879	32.0866	0				0	0	0	0	0	0	0	0	0	0	0	0	0	0	0	0	0	0	0	0	0	0	0	0	0	0	0	0	0	0	0	0	0	0	0	0	0	0	0	0	0	0	0
1.92854	33.8581	32.0255	0				0	0	0	0	0	0	0	0	0	0	0	0	0	0	0	0	0	0	0	0	0	0	0	0	0	0	0	0	0	0	0	0	0	0	0	0	0	0	0	0	0	0	0
1.93056	33.6601	32.0049	0				0	0	0	0	0	0	0	0	0	0	0	0	0	0	0	0	0	0	0	0	0	0	0	0	0	0	0	0	0	0	0	0	0	0	0	0	0	0	0	0	0	0	0
1.93258	33.7473	31.9156	0				0	0	0	0	0	0	0	0	0	0	0	0	0	0	0	0	0	0	0	0	0	0	0	0	0	0	0	0	0	0	0	0	0	0	0	0	0	0	0	0	0	0	0
1.93461	33.8355	31.8778	0				0	0	0	0	0	0	0	0	0	0	0	0	0	0	0	0	0	0	0	0	0	0	0	0	0	0	0	0	0	0	0	0	0	0	0	0	0	0	0	0	0	0	0
1.93663	33.8144	31.899	0				0	0	0	0	0	0	0	0	0	0	0	0	0	0	0	0	0	0	0	0	0	0	0	0	0	0	0	0	0	0	0	0	0	0	0	0	0	0	0	0	0	0	0
1.93865	33.8163	31.8338	0				0	0	0	0	0	0	0	0	0	0	0	0	0	0	0	0	0	0	0	0	0	0	0	0	0	0	0	0	0	0	0	0	0	0	0	0	0	0	0	0	0	0	0
1.94067	33.6701	31.8879	0				0	0	0	0	0	0	0	0	0	0	0	0	0	0	0	0	0	0	0	0	0	0	0	0	0	0	0	0	0	0	0	0	0	0	0	0	0	0	0	0	0	0	0
1.9427	33.5903	31.7184	0				0	0	0	0	0	0	0	0	0	0	0	0	0	0	0	0	0	0	0	0	0	0	0	0	0	0	0	0	0	0	0	0	0	0	0	0	0	0	0	0	0	0	0
1.94472	33.7021	31.8183	0				0	0	0	0	0	0	0	0	0	0	0	0	0	0	0	0	0	0	0	0	0	0	0	0	0	0	0	0	0	0	0	0	0	0	0	0	0	0	0	0	0	0	0
1.94674	33.8788	31.9274	0				0	0	0	0	0	0	0	0	0	0	0	0	0	0	0	0	0	0	0	0	0	0	0	0	0	0	0	0	0	0	0	0	0	0	0	0	0	0	0	0	0	0	0
1.94876	33.9213	31.867	0				0	0	0	0	0	0	0	0	0	0	0	0	0	0	0	0	0	0	0	0	0	0	0	0	0	0	0	0	0	0	0	0	0	0	0	0	0	0	0	0	0	0	0
1.95079	33.7978	31.7423	0				0	0	0	0	0	0	0	0	0	0	0	0	0	0	0	0	0	0	0	0	0	0	0	0	0	0	0	0	0	0	0	0	0	0	0	0	0	0	0	0	0	0	0
1.95281	33.9177	31.8363	0				0	0	0	0	0	0	0	0	0	0	0	0	0	0	0	0	0	0	0	0	0	0	0	0	0	0	0	0	0	0	0	0	0	0	0	0	0	0	0	0	0	0	0
1.95483	34.0146	32.0772	0				0	0	0	0	0	0	0	0	0	0	0	0	0	0	0	0	0	0	0	0	0	0	0	0	0	0	0	0	0	0	0	0	0	0	0	0	0	0	0	0	0	0	0
1.95685	33.9501	31.9112	0				0	0	0	0	0	0	0	0	0	0	0	0	0	0	0	0	0	0	0	0	0	0	0	0	0	0	0	0	0	0	0	0	0	0	0	0	0	0	0	0	0	0	0
1.95888	33.8326	31.7659	0				0	0	0	0	0	0	0	0	0	0	0	0	0	0	0	0	0	0	0	0	0	0	0	0	0	0	0	0	0	0	0	0	0	0	0	0	0	0	0	0	0	0	0
1.9609	33.7686	31.7568	0				0	0	0	0	0	0	0	0	0	0	0	0	0	0	0	0	0	0	0	0	0	0	0	0	0	0	0	0	0	0	0	0	0	0	0	0	0	0	0	0	0	0	0
1.96292	33.6721	31.6796	0				0	0	0	0	0	0	0	0	0	0	0	0	0	0	0	0	0	0	0	0	0	0	0	0	0	0	0	0	0	0	0	0	0	0	0	0	0	0	0	0	0	0	0
1.96494	33.7825	31.6943	0				0	0	0	0	0	0	0	0	0	0	0	0	0	0	0	0	0	0	0	0	0	0	0	0	0	0	0	0	0	0	0	0	0	0	0	0	0	0	0	0	0	0	0
1.96697	33.934	31.7669	0				0	0	0	0	0	0	0	0	0	0	0	0	0	0	0	0	0	0	0	0	0	0	0	0	0	0	0	0	0	0	0	0	0	0	0	0	0	0	0	0	0	0	0
1.96899	33.9971	31.7506	0				0	0	0	0	0	0	0	0	0	0	0	0	0	0	0	0	0	0	0	0	0	0	0	0	0	0	0	0	0	0	0	0	0	0	0	0	0	0	0	0	0	0	0
1.97101	33.9027	31.6089	0				0	0	0	0	0	0	0	0	0	0	0	0	0	0	0	0	0	0	0	0	0	0	0	0	0	0	0	0	0	0	0	0	0	0	0	0	0	0	0	0	0	0	0
1.97303	33.8632	31.5665	0				0	0	0	0	0	0	0	0	0	0	0	0	0	0	0	0	0	0	0	0	0	0	0	0	0	0	0	0	0	0	0	0	0	0	0	0	0	0	0	0	0	0	0
1.97506	33.6944	31.5921	0				0	0	0	0	0	0	0	0	0	0	0	0	0	0	0	0	0	0	0	0	0	0	0	0	0	0	0	0	0	0	0	0	0	0	0	0	0	0	0	0	0	0	0
1.97708	33.6633	31.8308	0				0	0	0	0	0	0	0	0	0	0	0	0	0	0	0	0	0	0	0	0	0	0	0	0	0	0	0	0	0	0	0	0	0	0	0	0	0	0	0	0	0	0	0
1.9791	33.5865	32.01	0				0	0	0	0	0	0	0	0	0	0	0	0	0	0	0	0	0	0	0	0	0	0	0	0	0	0	0	0	0	0	0	0	0	0	0	0	0	0	0	0	0	0	0
1.98112	33.5318	32.0463	0				0	0	0	0	0	0	0	0	0	0	0	0	0	0	0	0	0	0	0	0	0	0	0	0	0	0	0	0	0	0	0	0	0	0	0	0	0	0	0	0	0	0	0
1.98315	33.6877	31.9542	0				0	0	0	0	0	0	0	0	0	0	0	0	0	0	0	0	0	0	0	0	0	0	0	0	0	0	0	0	0	0	0	0	0	0	0	0	0	0	0	0	0	0	0
1.98517	33.7571	31.7766	0				0	0	0	0	0	0	0	0	0	0	0	0	0	0	0	0	0	0	0	0	0	0	0	0	0	0	0	0	0	0	0	0	0	0	0	0	0	0	0	0	0	0	0
1.98719	33.7533	31.6671	0				0	0	0	0	0	0	0	0	0	0	0	0	0	0	0	0	0	0	0	0	0	0	0	0	0	0	0	0	0	0	0	0	0	0	0	0	0	0	0	0	0	0	0
1.98922	33.6536	31.6919	0				0	0	0	0	0	0	0	0	0	0	0	0	0	0	0	0	0	0	0	0	0	0	0	0	0	0	0	0	0	0	0	0	0	0	0	0	0	0	0	0	0	0	0
1.99124	33.7048	31.5777	0				0	0	0	0	0	0	0	0	0	0	0	0	0	0	0	0	0	0	0	0	0	0	0	0	0	0	0	0	0	0	0	0	0	0	0	0	0	0	0	0	0	0	0
1.99326	33.5719	31.6583	0				0	0	0	0	0	0	0	0	0	0	0	0	0	0	0	0	0	0	0	0	0	0	0	0	0	0	0	0	0	0	0	0	0	0	0	0	0	0	0	0	0	0	0
1.99528	33.5638	31.8309	0				0	0	0	0	0	0	0	0	0	0	0	0	0	0	0	0	0	0	0	0	0	0	0	0	0	0	0	0	0	0	0	0	0	0	0	0	0	0	0	0	0	0	0
1.99731	33.6117	31.8177	0				0	0	0	0	0	0	0	0	0	0	0	0	0	0	0	0	0	0	0	0	0	0	0	0	0	0	0	0	0	0	0	0	0	0	0	0	0	0	0	0	0	0	0
1.99933	33.6465	31.6481	0				0	0	0	0	0	0	0	0	0	0	0	0	0	0	0	0	0	0	0	0	0	0	0	0	0	0	0	0	0	0	0	0	0	0	0	0	0	0	0	0	0	0	0
2.00135	33.8043	31.6662	0				0	0	0	0	0	0	0	0	0	0	0	0	0	0	0	0	0	0	0	0	0	0	0	0	0	0	0	0	0	0	0	0	0	0	0	0	0	0	0	0	0	0	0
2.00337	33.812	31.571	0				0	0	0	0	0	0	0	0	0	0	0	0	0	0	0	0	0	0	0	0	0	0	0	0	0	0	0	0	0	0	0	0	0	0	0	0	0	0	0	0	0	0	0
2.0054	33.6702	31.7451	0				0	0	0	0	0	0	0	0	0	0	0	0	0	0	0	0	0	0	0	0	0	0	0	0	0	0	0	0	0	0	0	0	0	0	0	0	0	0	0	0	0	0	0
2.00742	33.7114	31.6938	0				0	0	0	0	0	0	0	0	0	0	0	0	0	0	0	0	0	0	0	0	0	0	0	0	0	0	0	0	0	0	0	0	0	0	0	0	0	0	0	0	0	0	0
2.00944	33.7597	31.6199	0				0	0	0	0	0	0	0	0	0	0	0	0	0	0	0	0	0	0	0	0	0	0	0	0	0	0	0	0	0	0	0	0	0	0	0	0	0	0	0	0	0	0	0
2.01146	33.572	31.7013	0				0	0	0	0	0	0	0	0	0	0	0	0	0	0	0	0	0	0	0	0	0	0	0	0	0	0	0	0	0	0	0	0	0	0	0	0	0	0	0	0	0	0	0
2.01349	33.4833	31.6784	0				0	0	0	0	0	0	0	0	0	0	0	0	0	0	0	0	0	0	0	0	0	0	0	0	0	0	0	0	0	0	0	0	0	0	0	0	0	0	0	0	0	0	0
2.01551	33.6148	31.6484	0				0	0	0	0	0	0	0	0	0	0	0	0	0	0	0	0	0	0	0	0	0	0	0	0	0	0	0	0	0	0	0	0	0	0	0	0	0	0	0	0	0	0	0
2.01753	33.7891	31.5159	0				0	0	0	0	0	0	0	0	0	0	0	0	0	0	0	0	0	0	0	0	0	0	0	0	0	0	0	0	0	0	0	0	0	0	0	0	0	0	0	0	0	0	0
2.01955	33.843	31.6238	0				0	0	0	0	0	0	0	0	0	0	0	0	0	0	0	0	0	0	0	0	0	0	0	0	0	0	0	0	0	0	0	0	0	0	0	0	0	0	0	0	0	0	0
2.02158	33.7623	31.7633	0				0	0	0	0	0	0	0	0	0	0	0	0	0	0	0	0	0	0	0	0	0	0	0	0	0	0	0	0	0	0	0	0	0	0	0	0	0	0	0	0	0	0	0
2.0236	33.5794	31.8895	0				0	0	0	0	0	0	0	0	0	0	0	0	0	0	0	0	0	0	0	0	0	0	0	0	0	0	0	0	0	0	0	0	0	0	0	0	0	0	0	0	0	0	0
2.02562	33.5978	31.8416	0				0	0	0	0	0	0	0	0	0	0	0	0	0	0	0	0	0	0	0	0	0	0	0	0	0	0	0	0	0	0	0	0	0	0	0	0	0	0	0	0	0	0	0
2.02764	33.5655	31.6196	0				0	0	0	0	0	0	0	0	0	0	0	0	0	0	0	0	0	0	0	0	0	0	0	0	0	0	0	0	0	0	0	0	0	0	0	0	0	0	0	0	0	0	0
2.02967	33.4668	31.5206	0				0	0	0	0	0	0	0	0	0	0	0	0	0	0	0	0	0	0	0	0	0	0	0	0	0	0	0	0	0	0	0	0	0	0	0	0	0	0	0	0	0	0	0
2.03169	33.3528	31.6785	0				0	0	0	0	0	0	0	0	0	0	0	0	0	0	0	0	0	0	0	0	0	0	0	0	0	0	0	0	0	0	0	0	0	0	0	0	0	0	0	0	0	0	0
2.03371	33.4178	31.688	0				0	0	0	0	0	0	0	0	0	0	0	0	0	0	0	0	0	0	0	0	0	0	0	0	0	0	0	0	0	0	0	0	0	0	0	0	0	0	0	0	0	0	0
2.03573	33.4745	31.6686	0				0	0	0	0	0	0	0	0	0	0	0	0	0	0	0	0	0	0	0	0	0	0	0	0	0	0	0	0	0	0	0	0	0	0	0	0	0	0	0	0	0	0	0
2.03776	33.4319	31.4866	0				0	0	0	0	0	0	0	0	0	0	0	0	0	0	0	0	0	0	0	0	0	0	0	0	0	0	0	0	0	0	0	0	0	0	0	0	0	0	0	0	0	0	0
2.03978	33.433	31.4839	0				0	0	0	0	0	0	0	0	0	0	0	0	0	0	0	0	0	0	0	0	0	0	0	0	0	0	0	0	0	0	0	0	0	0	0	0	0	0	0	0	0	0	0
2.0418	33.4789	31.6632	0				0	0	0	0	0	0	0	0	0	0	0	0	0	0	0	0	0	0	0	0	0	0	0	0	0	0	0	0	0	0	0	0	0	0	0	0	0	0	0	0	0	0	0
2.04383	33.5997	31.5755	0				0	0	0	0	0	0	0	0	0	0	0	0	0	0	0	0	0	0	0	0	0	0	0	0	0	0	0	0	0	0	0	0	0	0	0	0	0	0	0	0	0	0	0
2.04585	33.5217	31.4404	0				0	0	0	0	0	0	0	0	0	0	0	0	0	0	0	0	0	0	0	0	0	0	0	0	0	0	0	0	0	0	0	0	0	0	0	0	0	0	0	0	0	0	0
2.04787	33.5748	31.5994	0				0	0	0	0	0	0	0	0	0	0	0	0	0	0	0	0	0	0	0	0	0	0	0	0	0	0	0	0	0	0	0	0	0	0	0	0	0	0	0	0	0	0	0
2.04989	33.6655	31.4872	0				0	0	0	0	0	0	0	0	0	0	0	0	0	0	0	0	0	0	0	0	0	0	0	0	0	0	0	0	0	0	0	0	0	0	0	0	0	0	0	0	0	0	0
2.05192	33.7487	31.5329	0				0	0	0	0	0	0	0	0	0	0	0	0	0	0	0	0	0	0	0	0	0	0	0	0	0	0	0	0	0	0	0	0	0	0	0	0	0	0	0	0	0	0	0
2.05394	33.589	31.552	0				0	0	0	0	0	0	0	0	0	0	0	0	0	0	0	0	0	0	0	0	0	0	0	0	0	0	0	0	0	0	0	0	0	0	0	0	0	0	0	0	0	0	0
2.05596	33.5047	31.5119	0				0	0	0	0	0	0	0	0	0	0	0	0	0	0	0	0	0	0	0	0	0	0	0	0	0	0	0	0	0	0	0	0	0	0	0	0	0	0	0	0	0	0	0
2.05798	33.5211	31.4393	0				0	0	0	0	0	0	0	0	0	0	0	0	0	0	0	0	0	0	0	0	0	0	0	0	0	0	0	0	0	0	0	0	0	0	0	0	0	0	0	0	0	0	0
2.06001	33.5575	31.4182	0				0	0	0	0	0	0	0	0	0	0	0	0	0	0	0	0	0	0	0	0	0	0	0	0	0	0	0	0	0	0	0	0	0	0	0	0	0	0	0	0	0	0	0
2.06203	33.5474	31.3735	0				0	0	0	0	0	0	0	0	0	0	0	0	0	0	0	0	0	0	0	0	0	0	0	0	0	0	0	0	0	0	0	0	0	0	0	0	0	0	0	0	0	0	0
2.06405	33.4077	31.3664	0				0	0	0	0	0	0	0	0	0	0	0	0	0	0	0	0	0	0	0	0	0	0	0	0	0	0	0	0	0	0	0	0	0	0	0	0	0	0	0	0	0	0	0
2.06607	33.4411	31.5033	0				0	0	0	0	0	0	0	0	0	0	0	0	0	0	0	0	0	0	0	0	0	0	0	0	0	0	0	0	0	0	0	0	0	0	0	0	0	0	0	0	0	0	0
2.0681	33.5674	31.6467	0				0	0	0	0	0	0	0	0	0	0	0	0	0	0	0	0	0	0	0	0	0	0	0	0	0	0	0	0	0	0	0	0	0	0	0	0	0	0	0	0	0	0	0
2.07012	33.677	31.5723	0				0	0	0	0	0	0	0	0	0	0	0	0	0	0	0	0	0	0	0	0	0	0	0	0	0	0	0	0	0	0	0	0	0	0	0	0	0	0	0	0	0	0	0
2.07214	33.6154	31.3752	0				0	0	0	0	0	0	0	0	0	0	0	0	0	0	0	0	0	0	0	0	0	0	0	0	0	0	0	0	0	0	0	0	0	0	0	0	0	0	0	0	0	0	0
2.07416	33.4624	31.3957	0				0	0	0	0	0	0	0	0	0	0	0	0	0	0	0	0	0	0	0	0	0	0	0	0	0	0	0	0	0	0	0	0	0	0	0	0	0	0	0	0	0	0	0
2.07619	33.404	31.6244	0				0	0	0	0	0	0	0	0	0	0	0	0	0	0	0	0	0	0	0	0	0	0	0	0	0	0	0	0	0	0	0	0	0	0	0	0	0	0	0	0	0	0	0
2.07821	33.4899	31.5091	0				0	0	0	0	0	0	0	0	0	0	0	0	0	0	0	0	0	0	0	0	0	0	0	0	0	0	0	0	0	0	0	0	0	0	0	0	0	0	0	0	0	0	0
2.08023	33.5686	31.2332	0				0	0	0	0	0	0	0	0	0	0	0	0	0	0	0	0	0	0	0	0	0	0	0	0	0	0	0	0	0	0	0	0	0	0	0	0	0	0	0	0	0	0	0
2.08225	33.6692	31.2024	0				0	0	0	0	0	0	0	0	0	0	0	0	0	0	0	0	0	0	0	0	0	0	0	0	0	0	0	0	0	0	0	0	0	0	0	0	0	0	0	0	0	0	0
2.08428	33.6953	31.3815	0				0	0	0	0	0	0	0	0	0	0	0	0	0	0	0	0	0	0	0	0	0	0	0	0	0	0	0	0	0	0	0	0	0	0	0	0	0	0	0	0	0	0	0
2.0863	33.5394	31.2998	0				0	0	0	0	0	0	0	0	0	0	0	0	0	0	0	0	0	0	0	0	0	0	0	0	0	0	0	0	0	0	0	0	0	0	0	0	0	0	0	0	0	0	0
2.08832	33.625	31.2277	0				0	0	0	0	0	0	0	0	0	0	0	0	0	0	0	0	0	0	0	0	0	0	0	0	0	0	0	0	0	0	0	0	0	0	0	0	0	0	0	0	0	0	0
2.09034	33.5054	31.2328	0				0	0	0	0	0	0	0	0	0	0	0	0	0	0	0	0	0	0	0	0	0	0	0	0	0	0	0	0	0	0	0	0	0	0	0	0	0	0	0	0	0	0	0
2.09237	33.5955	31.3006	0				0	0	0	0	0	0	0	0	0	0	0	0	0	0	0	0	0	0	0	0	0	0	0	0	0	0	0	0	0	0	0	0	0	0	0	0	0	0	0	0	0	0	0
2.09439	33.5372	31.2583	0				0	0	0	0	0	0	0	0	0	0	0	0	0	0	0	0	0	0	0	0	0	0	0	0	0	0	0	0	0	0	0	0	0	0	0	0	0	0	0	0	0	0	0
2.09641	33.4331	31.259	0				0	0	0	0	0	0	0	0	0	0	0	0	0	0	0	0	0	0	0	0	0	0	0	0	0	0	0	0	0	0	0	0	0	0	0	0	0	0	0	0	0	0	0
2.09843	33.3747	31.2811	0				0	0	0	0	0	0	0	0	0	0	0	0	0	0	0	0	0	0	0	0	0	0	0	0	0	0	0	0	0	0	0	0	0	0	0	0	0	0	0	0	0	0	0
2.10046	33.3416	31.1217	0				0	0	0	0	0	0	0	0	0	0	0	0	0	0	0	0	0	0	0	0	0	0	0	0	0	0	0	0	0	0	0	0	0	0	0	0	0	0	0	0	0	0	0
2.10248	33.2727	31.1454	0				0	0	0	0	0	0	0	0	0	0	0	0	0	0	0	0	0	0	0	0	0	0	0	0	0	0	0	0	0	0	0	0	0	0	0	0	0	0	0	0	0	0	0
2.1045	33.264	31.1957	0				0	0	0	0	0	0	0	0	0	0	0	0	0	0	0	0	0	0	0	0	0	0	0	0	0	0	0	0	0	0	0	0	0	0	0	0	0	0	0	0	0	0	0
2.10653	33.4526	31.3103	0				0	0	0	0	0	0	0	0	0	0	0	0	0	0	0	0	0	0	0	0	0	0	0	0	0	0	0	0	0	0	0	0	0	0	0	0	0	0	0	0	0	0	0
2.10855	33.6934	31.4358	0				0	0	0	0	0	0	0	0	0	0	0	0	0	0	0	0	0	0	0	0	0	0	0	0	0	0	0	0	0	0	0	0	0	0	0	0	0	0	0	0	0	0	0
2.11057	33.6786	31.3583	0				0	0	0	0	0	0	0	0	0	0	0	0	0	0	0	0	0	0	0	0	0	0	0	0	0	0	0	0	0	0	0	0	0	0	0	0	0	0	0	0	0	0	0
2.11259	33.6255	31.2026	0				0	0	0	0	0	0	0	0	0	0	0	0	0	0	0	0	0	0	0	0	0	0	0	0	0	0	0	0	0	0	0	0	0	0	0	0	0	0	0	0	0	0	0
2.11462	33.6457	31.4	0				0	0	0	0	0	0	0	0	0	0	0	0	0	0	0	0	0	0	0	0	0	0	0	0	0	0	0	0	0	0	0	0	0	0	0	0	0	0	0	0	0	0	0
2.11664	33.7102	31.5705	0				0	0	0	0	0	0	0	0	0	0	0	0	0	0	0	0	0	0	0	0	0	0	0	0	0	0	0	0	0	0	0	0	0	0	0	0	0	0	0	0	0	0	0
2.11866	33.726	31.4401	0				0	0	0	0	0	0	0	0	0	0	0	0	0	0	0	0	0	0	0	0	0	0	0	0	0	0	0	0	0	0	0	0	0	0	0	0	0	0	0	0	0	0	0
2.12068	33.6393	31.2614	0				0	0	0	0	0	0	0	0	0	0	0	0	0	0	0	0	0	0	0	0	0	0	0	0	0	0	0	0	0	0	0	0	0	0	0	0	0	0	0	0	0	0	0
2.12271	33.4891	31.4059	0				0	0	0	0	0	0	0	0	0	0	0	0	0	0	0	0	0	0	0	0	0	0	0	0	0	0	0	0	0	0	0	0	0	0	0	0	0	0	0	0	0	0	0
2.12473	33.3753	31.3324	0				0	0	0	0	0	0	0	0	0	0	0	0	0	0	0	0	0	0	0	0	0	0	0	0	0	0	0	0	0	0	0	0	0	0	0	0	0	0	0	0	0	0	0
2.12675	33.4766	31.3571	0				0	0	0	0	0	0	0	0	0	0	0	0	0	0	0	0	0	0	0	0	0	0	0	0	0	0	0	0	0	0	0	0	0	0	0	0	0	0	0	0	0	0	0
2.12877	33.537	31.286	0				0	0	0	0	0	0	0	0	0	0	0	0	0	0	0	0	0	0	0	0	0	0	0	0	0	0	0	0	0	0	0	0	0	0	0	0	0	0	0	0	0	0	0
2.1308	33.5292	31.186	0				0	0	0	0	0	0	0	0	0	0	0	0	0	0	0	0	0	0	0	0	0	0	0	0	0	0	0	0	0	0	0	0	0	0	0	0	0	0	0	0	0	0	0
2.13282	33.5762	31.2944	0				0	0	0	0	0	0	0	0	0	0	0	0	0	0	0	0	0	0	0	0	0	0	0	0	0	0	0	0	0	0	0	0	0	0	0	0	0	0	0	0	0	0	0
2.13484	33.5347	31.2279	0				0	0	0	0	0	0	0	0	0	0	0	0	0	0	0	0	0	0	0	0	0	0	0	0	0	0	0	0	0	0	0	0	0	0	0	0	0	0	0	0	0	0	0
2.13686	33.423	31.1258	0				0	0	0	0	0	0	0	0	0	0	0	0	0	0	0	0	0	0	0	0	0	0	0	0	0	0	0	0	0	0	0	0	0	0	0	0	0	0	0	0	0	0	0
2.13889	33.3285	31.0926	0				0	0	0	0	0	0	0	0	0	0	0	0	0	0	0	0	0	0	0	0	0	0	0	0	0	0	0	0	0	0	0	0	0	0	0	0	0	0	0	0	0	0	0
2.14091	33.2073	31.0627	0				0	0	0	0	0	0	0	0	0	0	0	0	0	0	0	0	0	0	0	0	0	0	0	0	0	0	0	0	0	0	0	0	0	0	0	0	0	0	0	0	0	0	0
2.14293	33.2107	31.0504	0				0	0	0	0	0	0	0	0	0	0	0	0	0	0	0	0	0	0	0	0	0	0	0	0	0	0	0	0	0	0	0	0	0	0	0	0	0	0	0	0	0	0	0
2.14495	33.3416	31.2402	0				0	0	0	0	0	0	0	0	0	0	0	0	0	0	0	0	0	0	0	0	0	0	0	0	0	0	0	0	0	0	0	0	0	0	0	0	0	0	0	0	0	0	0
2.14698	33.1289	31.0639	0				0	0	0	0	0	0	0	0	0	0	0	0	0	0	0	0	0	0	0	0	0	0	0	0	0	0	0	0	0	0	0	0	0	0	0	0	0	0	0	0	0	0	0
2.149	33.2209	31.0314	0				0	0	0	0	0	0	0	0	0	0	0	0	0	0	0	0	0	0	0	0	0	0	0	0	0	0	0	0	0	0	0	0	0	0	0	0	0	0	0	0	0	0	0
2.15102	33.2187	31.1051	0				0	0	0	0	0	0	0	0	0	0	0	0	0	0	0	0	0	0	0	0	0	0	0	0	0	0	0	0	0	0	0	0	0	0	0	0	0	0	0	0	0	0	0
2.15304	33.3051	31.2037	0				0	0	0	0	0	0	0	0	0	0	0	0	0	0	0	0	0	0	0	0	0	0	0	0	0	0	0	0	0	0	0	0	0	0	0	0	0	0	0	0	0	0	0
2.15507	33.2602	31.1504	0				0	0	0	0	0	0	0	0	0	0	0	0	0	0	0	0	0	0	0	0	0	0	0	0	0	0	0	0	0	0	0	0	0	0	0	0	0	0	0	0	0	0	0
2.15709	33.1564	31.0093	0				0	0	0	0	0	0	0	0	0	0	0	0	0	0	0	0	0	0	0	0	0	0	0	0	0	0	0	0	0	0	0	0	0	0	0	0	0	0	0	0	0	0	0
2.15911	33.3865	31.1266	0				0	0	0	0	0	0	0	0	0	0	0	0	0	0	0	0	0	0	0	0	0	0	0	0	0	0	0	0	0	0	0	0	0	0	0	0	0	0	0	0	0	0	0
2.16114	33.4257	31.1728	0				0	0	0	0	0	0	0	0	0	0	0	0	0	0	0	0	0	0	0	0	0	0	0	0	0	0	0	0	0	0	0	0	0	0	0	0	0	0	0	0	0	0	0
2.16316	33.2688	31.0584	0				0	0	0	0	0	0	0	0	0	0	0	0	0	0	0	0	0	0	0	0	0	0	0	0	0	0	0	0	0	0	0	0	0	0	0	0	0	0	0	0	0	0	0
2.16518	33.2848	31.1869	0				0	0	0	0	0	0	0	0	0	0	0	0	0	0	0	0	0	0	0	0	0	0	0	0	0	0	0	0	0	0	0	0	0	0	0	0	0	0	0	0	0	0	0
2.1672	33.2251	31.2468	0				0	0	0	0	0	0	0	0	0	0	0	0	0	0	0	0	0	0	0	0	0	0	0	0	0	0	0	0	0	0	0	0	0	0	0	0	0	0	0	0	0	0	0
2.16923	33.2361	31.27	0				0	0	0	0	0	0	0	0	0	0	0	0	0	0	0	0	0	0	0	0	0	0	0	0	0	0	0	0	0	0	0	0	0	0	0	0	0	0	0	0	0	0	0
2.17125	33.4555	31.221	0				0	0	0	0	0	0	0	0	0	0	0	0	0	0	0	0	0	0	0	0	0	0	0	0	0	0	0	0	0	0	0	0	0	0	0	0	0	0	0	0	0	0	0
2.17327	33.3233	31.0864	0				0	0	0	0	0	0	0	0	0	0	0	0	0	0	0	0	0	0	0	0	0	0	0	0	0	0	0	0	0	0	0	0	0	0	0	0	0	0	0	0	0	0	0
2.17529	33.2924	30.9106	0				0	0	0	0	0	0	0	0	0	0	0	0	0	0	0	0	0	0	0	0	0	0	0	0	0	0	0	0	0	0	0	0	0	0	0	0	0	0	0	0	0	0	0
2.17732	33.3006	31.0545	0				0	0	0	0	0	0	0	0	0	0	0	0	0	0	0	0	0	0	0	0	0	0	0	0	0	0	0	0	0	0	0	0	0	0	0	0	0	0	0	0	0	0	0
2.17934	33.2215	31.3491	0				0	0	0	0	0	0	0	0	0	0	0	0	0	0	0	0	0	0	0	0	0	0	0	0	0	0	0	0	0	0	0	0	0	0	0	0	0	0	0	0	0	0	0
2.18136	33.259	31.3776	0				0	0	0	0	0	0	0	0	0	0	0	0	0	0	0	0	0	0	0	0	0	0	0	0	0	0	0	0	0	0	0	0	0	0	0	0	0	0	0	0	0	0	0
2.18338	33.3864	31.164	0				0	0	0	0	0	0	0	0	0	0	0	0	0	0	0	0	0	0	0	0	0	0	0	0	0	0	0	0	0	0	0	0	0	0	0	0	0	0	0	0	0	0	0
2.18541	33.355	31.2235	0				0	0	0	0	0	0	0	0	0	0	0	0	0	0	0	0	0	0	0	0	0	0	0	0	0	0	0	0	0	0	0	0	0	0	0	0	0	0	0	0	0	0	0
2.18743	33.3105	31.198	0				0	0	0	0	0	0	0	0	0	0	0	0	0	0	0	0	0	0	0	0	0	0	0	0	0	0	0	0	0	0	0	0	0	0	0	0	0	0	0	0	0	0	0
2.18945	33.3286	31.0162	0				0	0	0	0	0	0	0	0	0	0	0	0	0	0	0	0	0	0	0	0	0	0	0	0	0	0	0	0	0	0	0	0	0	0	0	0	0	0	0	0	0	0	0
2.19147	33.329	31.0203	0				0	0	0	0	0	0	0	0	0	0	0	0	0	0	0	0	0	0	0	0	0	0	0	0	0	0	0	0	0	0	0	0	0	0	0	0	0	0	0	0	0	0	0
2.1935	33.3662	31.1395	0				0	0	0	0	0	0	0	0	0	0	0	0	0	0	0	0	0	0	0	0	0	0	0	0	0	0	0	0	0	0	0	0	0	0	0	0	0	0	0	0	0	0	0
2.19552	33.3145	31.0349	0				0	0	0	0	0	0	0	0	0	0	0	0	0	0	0	0	0	0	0	0	0	0	0	0	0	0	0	0	0	0	0	0	0	0	0	0	0	0	0	0	0	0	0
2.19754	33.2948	30.9639	0				0	0	0	0	0	0	0	0	0	0	0	0	0	0	0	0	0	0	0	0	0	0	0	0	0	0	0	0	0	0	0	0	0	0	0	0	0	0	0	0	0	0	0
2.19956	33.3976	31.0048	0				0	0	0	0	0	0	0	0	0	0	0	0	0	0	0	0	0	0	0	0	0	0	0	0	0	0	0	0	0	0	0	0	0	0	0	0	0	0	0	0	0	0	0
2.20159	33.4727	30.9715	0				0	0	0	0	0	0	0	0	0	0	0	0	0	0	0	0	0	0	0	0	0	0	0	0	0	0	0	0	0	0	0	0	0	0	0	0	0	0	0	0	0	0	0
2.20361	33.3488	31.0081	0				0	0	0	0	0	0	0	0	0	0	0	0	0	0	0	0	0	0	0	0	0	0	0	0	0	0	0	0	0	0	0	0	0	0	0	0	0	0	0	0	0	0	0
2.20563	33.2578	30.9619	0				0	0	0	0	0	0	0	0	0	0	0	0	0	0	0	0	0	0	0	0	0	0	0	0	0	0	0	0	0	0	0	0	0	0	0	0	0	0	0	0	0	0	0
2.20765	33.3612	30.8622	0				0	0	0	0	0	0	0	0	0	0	0	0	0	0	0	0	0	0	0	0	0	0	0	0	0	0	0	0	0	0	0	0	0	0	0	0	0	0	0	0	0	0	0
2.20968	33.4132	30.8732	0				0	0	0	0	0	0	0	0	0	0	0	0	0	0	0	0	0	0	0	0	0	0	0	0	0	0	0	0	0	0	0	0	0	0	0	0	0	0	0	0	0	0	0
2.2117	33.2622	30.9309	0				0	0	0	0	0	0	0	0	0	0	0	0	0	0	0	0	0	0	0	0	0	0	0	0	0	0	0	0	0	0	0	0	0	0	0	0	0	0	0	0	0	0	0
2.21372	33.1259	31.0564	0				0	0	0	0	0	0	0	0	0	0	0	0	0	0	0	0	0	0	0	0	0	0	0	0	0	0	0	0	0	0	0	0	0	0	0	0	0	0	0	0	0	0	0
2.21575	33.2455	31.0139	0				0	0	0	0	0	0	0	0	0	0	0	0	0	0	0	0	0	0	0	0	0	0	0	0	0	0	0	0	0	0	0	0	0	0	0	0	0	0	0	0	0	0	0
2.21777	33.238	30.8555	0				0	0	0	0	0	0	0	0	0	0	0	0	0	0	0	0	0	0	0	0	0	0	0	0	0	0	0	0	0	0	0	0	0	0	0	0	0	0	0	0	0	0	0
2.21979	33.2158	30.8288	0				0	0	0	0	0	0	0	0	0	0	0	0	0	0	0	0	0	0	0	0	0	0	0	0	0	0	0	0	0	0	0	0	0	0	0	0	0	0	0	0	0	0	0
2.22181	33.1906	30.8491	0				0	0	0	0	0	0	0	0	0	0	0	0	0	0	0	0	0	0	0	0	0	0	0	0	0	0	0	0	0	0	0	0	0	0	0	0	0	0	0	0	0	0	0
2.22384	33.2275	30.8605	0				0	0	0	0	0	0	0	0	0	0	0	0	0	0	0	0	0	0	0	0	0	0	0	0	0	0	0	0	0	0	0	0	0	0	0	0	0	0	0	0	0	0	0
2.22586	33.2629	30.8586	0				0	0	0	0	0	0	0	0	0	0	0	0	0	0	0	0	0	0	0	0	0	0	0	0	0	0	0	0	0	0	0	0	0	0	0	0	0	0	0	0	0	0	0
2.22788	33.1867	30.8088	0				0	0	0	0	0	0	0	0	0	0	0	0	0	0	0	0	0	0	0	0	0	0	0	0	0	0	0	0	0	0	0	0	0	0	0	0	0	0	0	0	0	0	0
2.2299	33.1882	30.8822	0				0	0	0	0	0	0	0	0	0	0	0	0	0	0	0	0	0	0	0	0	0	0	0	0	0	0	0	0	0	0	0	0	0	0	0	0	0	0	0	0	0	0	0
2.23193	33.2651	30.865	0				0	0	0	0	0	0	0	0	0	0	0	0	0	0	0	0	0	0	0	0	0	0	0	0	0	0	0	0	0	0	0	0	0	0	0	0	0	0	0	0	0	0	0
2.23395	33.267	30.8756	0				0	0	0	0	0	0	0	0	0	0	0	0	0	0	0	0	0	0	0	0	0	0	0	0	0	0	0	0	0	0	0	0	0	0	0	0	0	0	0	0	0	0	0
2.23597	33.1206	30.9223	0				0	0	0	0	0	0	0	0	0	0	0	0	0	0	0	0	0	0	0	0	0	0	0	0	0	0	0	0	0	0	0	0	0	0	0	0	0	0	0	0	0	0	0
2.23799	33.0384	30.734	0				0	0	0	0	0	0	0	0	0	0	0	0	0	0	0	0	0	0	0	0	0	0	0	0	0	0	0	0	0	0	0	0	0	0	0	0	0	0	0	0	0	0	0
2.24002	33.1786	30.8598	0				0	0	0	0	0	0	0	0	0	0	0	0	0	0	0	0	0	0	0	0	0	0	0	0	0	0	0	0	0	0	0	0	0	0	0	0	0	0	0	0	0	0	0
2.24204	33.3099	31.021	0				0	0	0	0	0	0	0	0	0	0	0	0	0	0	0	0	0	0	0	0	0	0	0	0	0	0	0	0	0	0	0	0	0	0	0	0	0	0	0	0	0	0	0
2.24406	33.3066	30.8788	0				0	0	0	0	0	0	0	0	0	0	0	0	0	0	0	0	0	0	0	0	0	0	0	0	0	0	0	0	0	0	0	0	0	0	0	0	0	0	0	0	0	0	0
2.24608	33.102	30.7243	0				0	0	0	0	0	0	0	0	0	0	0	0	0	0	0	0	0	0	0	0	0	0	0	0	0	0	0	0	0	0	0	0	0	0	0	0	0	0	0	0	0	0	0
2.24811	33.1568	30.6995	0				0	0	0	0	0	0	0	0	0	0	0	0	0	0	0	0	0	0	0	0	0	0	0	0	0	0	0	0	0	0	0	0	0	0	0	0	0	0	0	0	0	0	0
2.25013	33.2843	30.8129	0				0	0	0	0	0	0	0	0	0	0	0	0	0	0	0	0	0	0	0	0	0	0	0	0	0	0	0	0	0	0	0	0	0	0	0	0	0	0	0	0	0	0	0
2.25215	33.2261	30.9798	0				0	0	0	0	0	0	0	0	0	0	0	0	0	0	0	0	0	0	0	0	0	0	0	0	0	0	0	0	0	0	0	0	0	0	0	0	0	0	0	0	0	0	0
2.25417	33.1225	30.9382	0				0	0	0	0	0	0	0	0	0	0	0	0	0	0	0	0	0	0	0	0	0	0	0	0	0	0	0	0	0	0	0	0	0	0	0	0	0	0	0	0	0	0	0
2.2562	33.1671	30.9712	0				0	0	0	0	0	0	0	0	0	0	0	0	0	0	0	0	0	0	0	0	0	0	0	0	0	0	0	0	0	0	0	0	0	0	0	0	0	0	0	0	0	0	0
2.25822	33.2511	30.944	0				0	0	0	0	0	0	0	0	0	0	0	0	0	0	0	0	0	0	0	0	0	0	0	0	0	0	0	0	0	0	0	0	0	0	0	0	0	0	0	0	0	0	0
2.26024	33.1484	30.8288	0				0	0	0	0	0	0	0	0	0	0	0	0	0	0	0	0	0	0	0	0	0	0	0	0	0	0	0	0	0	0	0	0	0	0	0	0	0	0	0	0	0	0	0
2.26226	33.2841	30.8065	0				0	0	0	0	0	0	0	0	0	0	0	0	0	0	0	0	0	0	0	0	0	0	0	0	0	0	0	0	0	0	0	0	0	0	0	0	0	0	0	0	0	0	0
2.26429	33.1726	30.6906	0				0	0	0	0	0	0	0	0	0	0	0	0	0	0	0	0	0	0	0	0	0	0	0	0	0	0	0	0	0	0	0	0	0	0	0	0	0	0	0	0	0	0	0
2.26631	32.932	30.7618	0				0	0	0	0	0	0	0	0	0	0	0	0	0	0	0	0	0	0	0	0	0	0	0	0	0	0	0	0	0	0	0	0	0	0	0	0	0	0	0	0	0	0	0
2.26833	33.0694	30.7541	0				0	0	0	0	0	0	0	0	0	0	0	0	0	0	0	0	0	0	0	0	0	0	0	0	0	0	0	0	0	0	0	0	0	0	0	0	0	0	0	0	0	0	0
2.27035	33.1443	30.8925	0				0	0	0	0	0	0	0	0	0	0	0	0	0	0	0	0	0	0	0	0	0	0	0	0	0	0	0	0	0	0	0	0	0	0	0	0	0	0	0	0	0	0	0
2.27238	33.0856	30.8302	0				0	0	0	0	0	0	0	0	0	0	0	0	0	0	0	0	0	0	0	0	0	0	0	0	0	0	0	0	0	0	0	0	0	0	0	0	0	0	0	0	0	0	0
2.2744	33.2591	31.0373	0				0	0	0	0	0	0	0	0	0	0	0	0	0	0	0	0	0	0	0	0	0	0	0	0	0	0	0	0	0	0	0	0	0	0	0	0	0	0	0	0	0	0	0
2.27642	33.2814	31.1505	0				0	0	0	0	0	0	0	0	0	0	0	0	0	0	0	0	0	0	0	0	0	0	0	0	0	0	0	0	0	0	0	0	0	0	0	0	0	0	0	0	0	0	0
2.27845	33.1326	30.8796	0				0	0	0	0	0	0	0	0	0	0	0	0	0	0	0	0	0	0	0	0	0	0	0	0	0	0	0	0	0	0	0	0	0	0	0	0	0	0	0	0	0	0	0
2.28047	33.0619	30.899	0				0	0	0	0	0	0	0	0	0	0	0	0	0	0	0	0	0	0	0	0	0	0	0	0	0	0	0	0	0	0	0	0	0	0	0	0	0	0	0	0	0	0	0
2.28249	33.1594	30.8849	0				0	0	0	0	0	0	0	0	0	0	0	0	0	0	0	0	0	0	0	0	0	0	0	0	0	0	0	0	0	0	0	0	0	0	0	0	0	0	0	0	0	0	0
2.28451	33.2261	30.9942	0				0	0	0	0	0	0	0	0	0	0	0	0	0	0	0	0	0	0	0	0	0	0	0	0	0	0	0	0	0	0	0	0	0	0	0	0	0	0	0	0	0	0	0
2.28654	33.1405	30.966	0				0	0	0	0	0	0	0	0	0	0	0	0	0	0	0	0	0	0	0	0	0	0	0	0	0	0	0	0	0	0	0	0	0	0	0	0	0	0	0	0	0	0	0
2.28856	33.0777	31.0069	0				0	0	0	0	0	0	0	0	0	0	0	0	0	0	0	0	0	0	0	0	0	0	0	0	0	0	0	0	0	0	0	0	0	0	0	0	0	0	0	0	0	0	0
2.29058	33.1628	31.0213	0				0	0	0	0	0	0	0	0	0	0	0	0	0	0	0	0	0	0	0	0	0	0	0	0	0	0	0	0	0	0	0	0	0	0	0	0	0	0	0	0	0	0	0
2.2926	33.1991	30.9252	0				0	0	0	0	0	0	0	0	0	0	0	0	0	0	0	0	0	0	0	0	0	0	0	0	0	0	0	0	0	0	0	0	0	0	0	0	0	0	0	0	0	0	0
2.29463	33.1019	30.7777	0				0	0	0	0	0	0	0	0	0	0	0	0	0	0	0	0	0	0	0	0	0	0	0	0	0	0	0	0	0	0	0	0	0	0	0	0	0	0	0	0	0	0	0
2.29665	33.0272	30.4917	0				0	0	0	0	0	0	0	0	0	0	0	0	0	0	0	0	0	0	0	0	0	0	0	0	0	0	0	0	0	0	0	0	0	0	0	0	0	0	0	0	0	0	0
2.29867	33.186	30.548	0				0	0	0	0	0	0	0	0	0	0	0	0	0	0	0	0	0	0	0	0	0	0	0	0	0	0	0	0	0	0	0	0	0	0	0	0	0	0	0	0	0	0	0
2.30069	33.1615	30.6356	0				0	0	0	0	0	0	0	0	0	0	0	0	0	0	0	0	0	0	0	0	0	0	0	0	0	0	0	0	0	0	0	0	0	0	0	0	0	0	0	0	0	0	0
2.30272	32.9556	30.5153	0				0	0	0	0	0	0	0	0	0	0	0	0	0	0	0	0	0	0	0	0	0	0	0	0	0	0	0	0	0	0	0	0	0	0	0	0	0	0	0	0	0	0	0
2.30474	33.0119	30.539	0				0	0	0	0	0	0	0	0	0	0	0	0	0	0	0	0	0	0	0	0	0	0	0	0	0	0	0	0	0	0	0	0	0	0	0	0	0	0	0	0	0	0	0
2.30676	33.078	30.6579	0				0	0	0	0	0	0	0	0	0	0	0	0	0	0	0	0	0	0	0	0	0	0	0	0	0	0	0	0	0	0	0	0	0	0	0	0	0	0	0	0	0	0	0
2.30878	33.0344	30.6193	0				0	0	0	0	0	0	0	0	0	0	0	0	0	0	0	0	0	0	0	0	0	0	0	0	0	0	0	0	0	0	0	0	0	0	0	0	0	0	0	0	0	0	0
2.31081	33.0941	30.6741	0				0	0	0	0	0	0	0	0	0	0	0	0	0	0	0	0	0	0	0	0	0	0	0	0	0	0	0	0	0	0	0	0	0	0	0	0	0	0	0	0	0	0	0
2.31283	33.0545	30.6969	0				0	0	0	0	0	0	0	0	0	0	0	0	0	0	0	0	0	0	0	0	0	0	0	0	0	0	0	0	0	0	0	0	0	0	0	0	0	0	0	0	0	0	0
2.31485	32.8835	30.7948	0				0	0	0	0	0	0	0	0	0	0	0	0	0	0	0	0	0	0	0	0	0	0	0	0	0	0	0	0	0	0	0	0	0	0	0	0	0	0	0	0	0	0	0
2.31687	32.8926	30.7828	0				0	0	0	0	0	0	0	0	0	0	0	0	0	0	0	0	0	0	0	0	0	0	0	0	0	0	0	0	0	0	0	0	0	0	0	0	0	0	0	0	0	0	0
2.3189	32.8969	30.6813	0				0	0	0	0	0	0	0	0	0	0	0	0	0	0	0	0	0	0	0	0	0	0	0	0	0	0	0	0	0	0	0	0	0	0	0	0	0	0	0	0	0	0	0
2.32092	32.9142	30.6975	0				0	0	0	0	0	0	0	0	0	0	0	0	0	0	0	0	0	0	0	0	0	0	0	0	0	0	0	0	0	0	0	0	0	0	0	0	0	0	0	0	0	0	0
2.32294	33.0416	30.7889	0				0	0	0	0	0	0	0	0	0	0	0	0	0	0	0	0	0	0	0	0	0	0	0	0	0	0	0	0	0	0	0	0	0	0	0	0	0	0	0	0	0	0	0
2.32496	32.9703	30.6398	0				0	0	0	0	0	0	0	0	0	0	0	0	0	0	0	0	0	0	0	0	0	0	0	0	0	0	0	0	0	0	0	0	0	0	0	0	0	0	0	0	0	0	0
2.32699	32.9166	30.4557	0				0	0	0	0	0	0	0	0	0	0	0	0	0	0	0	0	0	0	0	0	0	0	0	0	0	0	0	0	0	0	0	0	0	0	0	0	0	0	0	0	0	0	0
2.32901	33.1042	30.708	0				0	0	0	0	0	0	0	0	0	0	0	0	0	0	0	0	0	0	0	0	0	0	0	0	0	0	0	0	0	0	0	0	0	0	0	0	0	0	0	0	0	0	0
2.33103	33.2454	30.8257	0				0	0	0	0	0	0	0	0	0	0	0	0	0	0	0	0	0	0	0	0	0	0	0	0	0	0	0	0	0	0	0	0	0	0	0	0	0	0	0	0	0	0	0
2.33306	33.198	30.6518	0				0	0	0	0	0	0	0	0	0	0	0	0	0	0	0	0	0	0	0	0	0	0	0	0	0	0	0	0	0	0	0	0	0	0	0	0	0	0	0	0	0	0	0
2.33508	33.1087	30.6967	0				0	0	0	0	0	0	0	0	0	0	0	0	0	0	0	0	0	0	0	0	0	0	0	0	0	0	0	0	0	0	0	0	0	0	0	0	0	0	0	0	0	0	0
2.3371	33.0148	30.7179	0				0	0	0	0	0	0	0	0	0	0	0	0	0	0	0	0	0	0	0	0	0	0	0	0	0	0	0	0	0	0	0	0	0	0	0	0	0	0	0	0	0	0	0
2.33912	33.0418	30.7106	0				0	0	0	0	0	0	0	0	0	0	0	0	0	0	0	0	0	0	0	0	0	0	0	0	0	0	0	0	0	0	0	0	0	0	0	0	0	0	0	0	0	0	0
2.34115	33.0338	30.7539	0				0	0	0	0	0	0	0	0	0	0	0	0	0	0	0	0	0	0	0	0	0	0	0	0	0	0	0	0	0	0	0	0	0	0	0	0	0	0	0	0	0	0	0
2.34317	32.944	30.8075	0				0	0	0	0	0	0	0	0	0	0	0	0	0	0	0	0	0	0	0	0	0	0	0	0	0	0	0	0	0	0	0	0	0	0	0	0	0	0	0	0	0	0	0
2.34519	32.9712	30.77	0				0	0	0	0	0	0	0	0	0	0	0	0	0	0	0	0	0	0	0	0	0	0	0	0	0	0	0	0	0	0	0	0	0	0	0	0	0	0	0	0	0	0	0
2.34721	33.1707	30.6633	0				0	0	0	0	0	0	0	0	0	0	0	0	0	0	0	0	0	0	0	0	0	0	0	0	0	0	0	0	0	0	0	0	0	0	0	0	0	0	0	0	0	0	0
2.34924	33.2718	30.5305	0				0	0	0	0	0	0	0	0	0	0	0	0	0	0	0	0	0	0	0	0	0	0	0	0	0	0	0	0	0	0	0	0	0	0	0	0	0	0	0	0	0	0	0
2.35126	33.2113	30.5471	0				0	0	0	0	0	0	0	0	0	0	0	0	0	0	0	0	0	0	0	0	0	0	0	0	0	0	0	0	0	0	0	0	0	0	0	0	0	0	0	0	0	0	0
2.35328	33.1476	30.6101	0				0	0	0	0	0	0	0	0	0	0	0	0	0	0	0	0	0	0	0	0	0	0	0	0	0	0	0	0	0	0	0	0	0	0	0	0	0	0	0	0	0	0	0
2.3553	32.979	30.5355	0				0	0	0	0	0	0	0	0	0	0	0	0	0	0	0	0	0	0	0	0	0	0	0	0	0	0	0	0	0	0	0	0	0	0	0	0	0	0	0	0	0	0	0
2.35733	32.9897	30.6204	0				0	0	0	0	0	0	0	0	0	0	0	0	0	0	0	0	0	0	0	0	0	0	0	0	0	0	0	0	0	0	0	0	0	0	0	0	0	0	0	0	0	0	0
2.35935	32.9493	30.5994	0				0	0	0	0	0	0	0	0	0	0	0	0	0	0	0	0	0	0	0	0	0	0	0	0	0	0	0	0	0	0	0	0	0	0	0	0	0	0	0	0	0	0	0
2.36137	33.0298	30.5944	0				0	0	0	0	0	0	0	0	0	0	0	0	0	0	0	0	0	0	0	0	0	0	0	0	0	0	0	0	0	0	0	0	0	0	0	0	0	0	0	0	0	0	0
2.36339	32.934	30.6426	0				0	0	0	0	0	0	0	0	0	0	0	0	0	0	0	0	0	0	0	0	0	0	0	0	0	0	0	0	0	0	0	0	0	0	0	0	0	0	0	0	0	0	0
2.36542	32.9142	30.6567	0				0	0	0	0	0	0	0	0	0	0	0	0	0	0	0	0	0	0	0	0	0	0	0	0	0	0	0	0	0	0	0	0	0	0	0	0	0	0	0	0	0	0	0
2.36744	32.81	30.6423	0				0	0	0	0	0	0	0	0	0	0	0	0	0	0	0	0	0	0	0	0	0	0	0	0	0	0	0	0	0	0	0	0	0	0	0	0	0	0	0	0	0	0	0
2.36946	32.7994	30.7197	0				0	0	0	0	0	0	0	0	0	0	0	0	0	0	0	0	0	0	0	0	0	0	0	0	0	0	0	0	0	0	0	0	0	0	0	0	0	0	0	0	0	0	0
2.37148	32.9629	30.5679	0				0	0	0	0	0	0	0	0	0	0	0	0	0	0	0	0	0	0	0	0	0	0	0	0	0	0	0	0	0	0	0	0	0	0	0	0	0	0	0	0	0	0	0
2.37351	33.1022	30.6072	0				0	0	0	0	0	0	0	0	0	0	0	0	0	0	0	0	0	0	0	0	0	0	0	0	0	0	0	0	0	0	0	0	0	0	0	0	0	0	0	0	0	0	0
2.37553	33.064	30.7194	0				0	0	0	0	0	0	0	0	0	0	0	0	0	0	0	0	0	0	0	0	0	0	0	0	0	0	0	0	0	0	0	0	0	0	0	0	0	0	0	0	0	0	0
2.37755	32.8929	30.6135	0				0	0	0	0	0	0	0	0	0	0	0	0	0	0	0	0	0	0	0	0	0	0	0	0	0	0	0	0	0	0	0	0	0	0	0	0	0	0	0	0	0	0	0
2.37957	32.6728	30.5407	0				0	0	0	0	0	0	0	0	0	0	0	0	0	0	0	0	0	0	0	0	0	0	0	0	0	0	0	0	0	0	0	0	0	0	0	0	0	0	0	0	0	0	0
2.3816	32.6507	30.6001	0				0	0	0	0	0	0	0	0	0	0	0	0	0	0	0	0	0	0	0	0	0	0	0	0	0	0	0	0	0	0	0	0	0	0	0	0	0	0	0	0	0	0	0
2.38362	32.8933	30.6784	0				0	0	0	0	0	0	0	0	0	0	0	0	0	0	0	0	0	0	0	0	0	0	0	0	0	0	0	0	0	0	0	0	0	0	0	0	0	0	0	0	0	0	0
2.38564	32.988	30.5054	0				0	0	0	0	0	0	0	0	0	0	0	0	0	0	0	0	0	0	0	0	0	0	0	0	0	0	0	0	0	0	0	0	0	0	0	0	0	0	0	0	0	0	0
2.38767	32.9666	30.5146	0				0	0	0	0	0	0	0	0	0	0	0	0	0	0	0	0	0	0	0	0	0	0	0	0	0	0	0	0	0	0	0	0	0	0	0	0	0	0	0	0	0	0	0
2.38969	32.9141	30.4762	0				0	0	0	0	0	0	0	0	0	0	0	0	0	0	0	0	0	0	0	0	0	0	0	0	0	0	0	0	0	0	0	0	0	0	0	0	0	0	0	0	0	0	0
2.39171	32.8439	30.5444	0				0	0	0	0	0	0	0	0	0	0	0	0	0	0	0	0	0	0	0	0	0	0	0	0	0	0	0	0	0	0	0	0	0	0	0	0	0	0	0	0	0	0	0
2.39373	33.0534	30.7595	0				0	0	0	0	0	0	0	0	0	0	0	0	0	0	0	0	0	0	0	0	0	0	0	0	0	0	0	0	0	0	0	0	0	0	0	0	0	0	0	0	0	0	0
2.39576	33.1178	30.7752	0				0	0	0	0	0	0	0	0	0	0	0	0	0	0	0	0	0	0	0	0	0	0	0	0	0	0	0	0	0	0	0	0	0	0	0	0	0	0	0	0	0	0	0
2.39778	33.1488	30.6197	0				0	0	0	0	0	0	0	0	0	0	0	0	0	0	0	0	0	0	0	0	0	0	0	0	0	0	0	0	0	0	0	0	0	0	0	0	0	0	0	0	0	0	0
2.3998	33.0377	30.46	0				0	0	0	0	0	0	0	0	0	0	0	0	0	0	0	0	0	0	0	0	0	0	0	0	0	0	0	0	0	0	0	0	0	0	0	0	0	0	0	0	0	0	0
2.40182	32.9324	30.5444	0				0	0	0	0	0	0	0	0	0	0	0	0	0	0	0	0	0	0	0	0	0	0	0	0	0	0	0	0	0	0	0	0	0	0	0	0	0	0	0	0	0	0	0
2.40385	33.0244	30.9463	0				0	0	0	0	0	0	0	0	0	0	0	0	0	0	0	0	0	0	0	0	0	0	0	0	0	0	0	0	0	0	0	0	0	0	0	0	0	0	0	0	0	0	0
2.40587	33.0639	30.7812	0				0	0	0	0	0	0	0	0	0	0	0	0	0	0	0	0	0	0	0	0	0	0	0	0	0	0	0	0	0	0	0	0	0	0	0	0	0	0	0	0	0	0	0
2.40789	33.0419	30.6205	0				0	0	0	0	0	0	0	0	0	0	0	0	0	0	0	0	0	0	0	0	0	0	0	0	0	0	0	0	0	0	0	0	0	0	0	0	0	0	0	0	0	0	0
2.40991	33.0813	30.6158	0				0	0	0	0	0	0	0	0	0	0	0	0	0	0	0	0	0	0	0	0	0	0	0	0	0	0	0	0	0	0	0	0	0	0	0	0	0	0	0	0	0	0	0
2.41194	33.0583	30.5371	0				0	0	0	0	0	0	0	0	0	0	0	0	0	0	0	0	0	0	0	0	0	0	0	0	0	0	0	0	0	0	0	0	0	0	0	0	0	0	0	0	0	0	0
2.41396	32.954	30.618	0				0	0	0	0	0	0	0	0	0	0	0	0	0	0	0	0	0	0	0	0	0	0	0	0	0	0	0	0	0	0	0	0	0	0	0	0	0	0	0	0	0	0	0
2.41598	33.023	30.5889	0				0	0	0	0	0	0	0	0	0	0	0	0	0	0	0	0	0	0	0	0	0	0	0	0	0	0	0	0	0	0	0	0	0	0	0	0	0	0	0	0	0	0	0
2.418	33.0397	30.5499	0				0	0	0	0	0	0	0	0	0	0	0	0	0	0	0	0	0	0	0	0	0	0	0	0	0	0	0	0	0	0	0	0	0	0	0	0	0	0	0	0	0	0	0
2.42003	33.124	30.4683	0				0	0	0	0	0	0	0	0	0	0	0	0	0	0	0	0	0	0	0	0	0	0	0	0	0	0	0	0	0	0	0	0	0	0	0	0	0	0	0	0	0	0	0
2.42205	33.1643	30.4896	0				0	0	0	0	0	0	0	0	0	0	0	0	0	0	0	0	0	0	0	0	0	0	0	0	0	0	0	0	0	0	0	0	0	0	0	0	0	0	0	0	0	0	0
2.42407	33.097	30.4754	0				0	0	0	0	0	0	0	0	0	0	0	0	0	0	0	0	0	0	0	0	0	0	0	0	0	0	0	0	0	0	0	0	0	0	0	0	0	0	0	0	0	0	0
2.42609	33.1436	30.5374	0				0	0	0	0	0	0	0	0	0	0	0	0	0	0	0	0	0	0	0	0	0	0	0	0	0	0	0	0	0	0	0	0	0	0	0	0	0	0	0	0	0	0	0
2.42812	33.0628	30.4777	0				0	0	0	0	0	0	0	0	0	0	0	0	0	0	0	0	0	0	0	0	0	0	0	0	0	0	0	0	0	0	0	0	0	0	0	0	0	0	0	0	0	0	0
2.43014	33.0584	30.4706	0				0	0	0	0	0	0	0	0	0	0	0	0	0	0	0	0	0	0	0	0	0	0	0	0	0	0	0	0	0	0	0	0	0	0	0	0	0	0	0	0	0	0	0
2.43216	33.0041	30.553	0				0	0	0	0	0	0	0	0	0	0	0	0	0	0	0	0	0	0	0	0	0	0	0	0	0	0	0	0	0	0	0	0	0	0	0	0	0	0	0	0	0	0	0
2.43418	32.9228	30.4388	0				0	0	0	0	0	0	0	0	0	0	0	0	0	0	0	0	0	0	0	0	0	0	0	0	0	0	0	0	0	0	0	0	0	0	0	0	0	0	0	0	0	0	0
2.43621	32.8684	30.3121	0				0	0	0	0	0	0	0	0	0	0	0	0	0	0	0	0	0	0	0	0	0	0	0	0	0	0	0	0	0	0	0	0	0	0	0	0	0	0	0	0	0	0	0
2.43823	33.0024	30.4385	0				0	0	0	0	0	0	0	0	0	0	0	0	0	0	0	0	0	0	0	0	0	0	0	0	0	0	0	0	0	0	0	0	0	0	0	0	0	0	0	0	0	0	0
2.44025	32.9686	30.4721	0				0	0	0	0	0	0	0	0	0	0	0	0	0	0	0	0	0	0	0	0	0	0	0	0	0	0	0	0	0	0	0	0	0	0	0	0	0	0	0	0	0	0	0
2.44227	32.734	30.3674	0				0	0	0	0	0	0	0	0	0	0	0	0	0	0	0	0	0	0	0	0	0	0	0	0	0	0	0	0	0	0	0	0	0	0	0	0	0	0	0	0	0	0	0
2.4443	32.8609	30.391	0				0	0	0	0	0	0	0	0	0	0	0	0	0	0	0	0	0	0	0	0	0	0	0	0	0	0	0	0	0	0	0	0	0	0	0	0	0	0	0	0	0	0	0
2.44632	32.9601	30.593	0				0	0	0	0	0	0	0	0	0	0	0	0	0	0	0	0	0	0	0	0	0	0	0	0	0	0	0	0	0	0	0	0	0	0	0	0	0	0	0	0	0	0	0
2.44834	32.8968	30.6215	0				0	0	0	0	0	0	0	0	0	0	0	0	0	0	0	0	0	0	0	0	0	0	0	0	0	0	0	0	0	0	0	0	0	0	0	0	0	0	0	0	0	0	0
2.45037	32.8175	30.5865	0				0	0	0	0	0	0	0	0	0	0	0	0	0	0	0	0	0	0	0	0	0	0	0	0	0	0	0	0	0	0	0	0	0	0	0	0	0	0	0	0	0	0	0
2.45239	32.7542	30.5338	0				0	0	0	0	0	0	0	0	0	0	0	0	0	0	0	0	0	0	0	0	0	0	0	0	0	0	0	0	0	0	0	0	0	0	0	0	0	0	0	0	0	0	0
2.45441	32.6982	30.5242	0				0	0	0	0	0	0	0	0	0	0	0	0	0	0	0	0	0	0	0	0	0	0	0	0	0	0	0	0	0	0	0	0	0	0	0	0	0	0	0	0	0	0	0
2.45643	32.6789	30.3047	0				0	0	0	0	0	0	0	0	0	0	0	0	0	0	0	0	0	0	0	0	0	0	0	0	0	0	0	0	0	0	0	0	0	0	0	0	0	0	0	0	0	0	0
2.45846	32.7257	30.3364	0				0	0	0	0	0	0	0	0	0	0	0	0	0	0	0	0	0	0	0	0	0	0	0	0	0	0	0	0	0	0	0	0	0	0	0	0	0	0	0	0	0	0	0
2.46048	32.9382	30.4234	0				0	0	0	0	0	0	0	0	0	0	0	0	0	0	0	0	0	0	0	0	0	0	0	0	0	0	0	0	0	0	0	0	0	0	0	0	0	0	0	0	0	0	0
2.4625	33.012	30.3916	0				0	0	0	0	0	0	0	0	0	0	0	0	0	0	0	0	0	0	0	0	0	0	0	0	0	0	0	0	0	0	0	0	0	0	0	0	0	0	0	0	0	0	0
2.46452	32.9077	30.3141	0				0	0	0	0	0	0	0	0	0	0	0	0	0	0	0	0	0	0	0	0	0	0	0	0	0	0	0	0	0	0	0	0	0	0	0	0	0	0	0	0	0	0	0
2.46655	33.0427	30.4106	0				0	0	0	0	0	0	0	0	0	0	0	0	0	0	0	0	0	0	0	0	0	0	0	0	0	0	0	0	0	0	0	0	0	0	0	0	0	0	0	0	0	0	0
2.46857	33.1441	30.5826	0				0	0	0	0	0	0	0	0	0	0	0	0	0	0	0	0	0	0	0	0	0	0	0	0	0	0	0	0	0	0	0	0	0	0	0	0	0	0	0	0	0	0	0
2.47059	33.0014	30.4139	0				0	0	0	0	0	0	0	0	0	0	0	0	0	0	0	0	0	0	0	0	0	0	0	0	0	0	0	0	0	0	0	0	0	0	0	0	0	0	0	0	0	0	0
2.47261	32.8937	30.4568	0				0	0	0	0	0	0	0	0	0	0	0	0	0	0	0	0	0	0	0	0	0	0	0	0	0	0	0	0	0	0	0	0	0	0	0	0	0	0	0	0	0	0	0
2.47464	32.9276	30.4221	0				0	0	0	0	0	0	0	0	0	0	0	0	0	0	0	0	0	0	0	0	0	0	0	0	0	0	0	0	0	0	0	0	0	0	0	0	0	0	0	0	0	0	0
2.47666	32.9781	30.4666	0				0	0	0	0	0	0	0	0	0	0	0	0	0	0	0	0	0	0	0	0	0	0	0	0	0	0	0	0	0	0	0	0	0	0	0	0	0	0	0	0	0	0	0
2.47868	32.7818	30.5565	0				0	0	0	0	0	0	0	0	0	0	0	0	0	0	0	0	0	0	0	0	0	0	0	0	0	0	0	0	0	0	0	0	0	0	0	0	0	0	0	0	0	0	0
2.4807	32.7263	30.5345	0				0	0	0	0	0	0	0	0	0	0	0	0	0	0	0	0	0	0	0	0	0	0	0	0	0	0	0	0	0	0	0	0	0	0	0	0	0	0	0	0	0	0	0
2.48273	32.7669	30.5277	0				0	0	0	0	0	0	0	0	0	0	0	0	0	0	0	0	0	0	0	0	0	0	0	0	0	0	0	0	0	0	0	0	0	0	0	0	0	0	0	0	0	0	0
2.48475	32.8982	30.4453	0				0	0	0	0	0	0	0	0	0	0	0	0	0	0	0	0	0	0	0	0	0	0	0	0	0	0	0	0	0	0	0	0	0	0	0	0	0	0	0	0	0	0	0
2.48677	32.9666	30.2747	0				0	0	0	0	0	0	0	0	0	0	0	0	0	0	0	0	0	0	0	0	0	0	0	0	0	0	0	0	0	0	0	0	0	0	0	0	0	0	0	0	0	0	0
2.48879	32.9228	30.4102	0				0	0	0	0	0	0	0	0	0	0	0	0	0	0	0	0	0	0	0	0	0	0	0	0	0	0	0	0	0	0	0	0	0	0	0	0	0	0	0	0	0	0	0
2.49082	32.8468	30.3886	0				0	0	0	0	0	0	0	0	0	0	0	0	0	0	0	0	0	0	0	0	0	0	0	0	0	0	0	0	0	0	0	0	0	0	0	0	0	0	0	0	0	0	0
2.49284	32.8219	30.4218	0				0	0	0	0	0	0	0	0	0	0	0	0	0	0	0	0	0	0	0	0	0	0	0	0	0	0	0	0	0	0	0	0	0	0	0	0	0	0	0	0	0	0	0
2.49486	32.8002	30.4774	0				0	0	0	0	0	0	0	0	0	0	0	0	0	0	0	0	0	0	0	0	0	0	0	0	0	0	0	0	0	0	0	0	0	0	0	0	0	0	0	0	0	0	0
2.49688	32.8722	30.4395	0				0	0	0	0	0	0	0	0	0	0	0	0	0	0	0	0	0	0	0	0	0	0	0	0	0	0	0	0	0	0	0	0	0	0	0	0	0	0	0	0	0	0	0
2.49891	32.7073	30.456	0				0	0	0	0	0	0	0	0	0	0	0	0	0	0	0	0	0	0	0	0	0	0	0	0	0	0	0	0	0	0	0	0	0	0	0	0	0	0	0	0	0	0	0
2.50093	32.6991	30.3877	0				0	0	0	0	0	0	0	0	0	0	0	0	0	0	0	0	0	0	0	0	0	0	0	0	0	0	0	0	0	0	0	0	0	0	0	0	0	0	0	0	0	0	0
2.50295	32.715	30.3966	0				0	0	0	0	0	0	0	0	0	0	0	0	0	0	0	0	0	0	0	0	0	0	0	0	0	0	0	0	0	0	0	0	0	0	0	0	0	0	0	0	0	0	0
2.50498	32.4944	30.4588	0				0	0	0	0	0	0	0	0	0	0	0	0	0	0	0	0	0	0	0	0	0	0	0	0	0	0	0	0	0	0	0	0	0	0	0	0	0	0	0	0	0	0	0
2.507	32.5224	30.4355	0				0	0	0	0	0	0	0	0	0	0	0	0	0	0	0	0	0	0	0	0	0	0	0	0	0	0	0	0	0	0	0	0	0	0	0	0	0	0	0	0	0	0	0
2.50902	32.79	30.3688	0				0	0	0	0	0	0	0	0	0	0	0	0	0	0	0	0	0	0	0	0	0	0	0	0	0	0	0	0	0	0	0	0	0	0	0	0	0	0	0	0	0	0	0
2.51104	32.7596	30.2879	0				0	0	0	0	0	0	0	0	0	0	0	0	0	0	0	0	0	0	0	0	0	0	0	0	0	0	0	0	0	0	0	0	0	0	0	0	0	0	0	0	0	0	0
2.51307	32.711	30.363	0				0	0	0	0	0	0	0	0	0	0	0	0	0	0	0	0	0	0	0	0	0	0	0	0	0	0	0	0	0	0	0	0	0	0	0	0	0	0	0	0	0	0	0
2.51509	32.8029	30.3481	0				0	0	0	0	0	0	0	0	0	0	0	0	0	0	0	0	0	0	0	0	0	0	0	0	0	0	0	0	0	0	0	0	0	0	0	0	0	0	0	0	0	0	0
2.51711	32.9955	30.3086	0				0	0	0	0	0	0	0	0	0	0	0	0	0	0	0	0	0	0	0	0	0	0	0	0	0	0	0	0	0	0	0	0	0	0	0	0	0	0	0	0	0	0	0
2.51913	33.0104	30.2753	0				0	0	0	0	0	0	0	0	0	0	0	0	0	0	0	0	0	0	0	0	0	0	0	0	0	0	0	0	0	0	0	0	0	0	0	0	0	0	0	0	0	0	0
2.52116	32.8545	30.3102	0				0	0	0	0	0	0	0	0	0	0	0	0	0	0	0	0	0	0	0	0	0	0	0	0	0	0	0	0	0	0	0	0	0	0	0	0	0	0	0	0	0	0	0
2.52318	32.7708	30.4197	0				0	0	0	0	0	0	0	0	0	0	0	0	0	0	0	0	0	0	0	0	0	0	0	0	0	0	0	0	0	0	0	0	0	0	0	0	0	0	0	0	0	0	0
2.5252	32.9471	30.6058	0				0	0	0	0	0	0	0	0	0	0	0	0	0	0	0	0	0	0	0	0	0	0	0	0	0	0	0	0	0	0	0	0	0	0	0	0	0	0	0	0	0	0	0
2.52722	32.9268	30.5627	0				0	0	0	0	0	0	0	0	0	0	0	0	0	0	0	0	0	0	0	0	0	0	0	0	0	0	0	0	0	0	0	0	0	0	0	0	0	0	0	0	0	0	0
2.52925	32.8318	30.4588	0				0	0	0	0	0	0	0	0	0	0	0	0	0	0	0	0	0	0	0	0	0	0	0	0	0	0	0	0	0	0	0	0	0	0	0	0	0	0	0	0	0	0	0
2.53127	32.732	30.3142	0				0	0	0	0	0	0	0	0	0	0	0	0	0	0	0	0	0	0	0	0	0	0	0	0	0	0	0	0	0	0	0	0	0	0	0	0	0	0	0	0	0	0	0
2.53329	32.7737	30.2056	0				0	0	0	0	0	0	0	0	0	0	0	0	0	0	0	0	0	0	0	0	0	0	0	0	0	0	0	0	0	0	0	0	0	0	0	0	0	0	0	0	0	0	0
2.53531	32.8359	30.3218	0				0	0	0	0	0	0	0	0	0	0	0	0	0	0	0	0	0	0	0	0	0	0	0	0	0	0	0	0	0	0	0	0	0	0	0	0	0	0	0	0	0	0	0
2.53734	32.8546	30.3904	0				0	0	0	0	0	0	0	0	0	0	0	0	0	0	0	0	0	0	0	0	0	0	0	0	0	0	0	0	0	0	0	0	0	0	0	0	0	0	0	0	0	0	0
2.53936	32.7969	30.5075	0				0	0	0	0	0	0	0	0	0	0	0	0	0	0	0	0	0	0	0	0	0	0	0	0	0	0	0	0	0	0	0	0	0	0	0	0	0	0	0	0	0	0	0
2.54138	32.7845	30.5224	0				0	0	0	0	0	0	0	0	0	0	0	0	0	0	0	0	0	0	0	0	0	0	0	0	0	0	0	0	0	0	0	0	0	0	0	0	0	0	0	0	0	0	0
2.5434	32.8025	30.3711	0				0	0	0	0	0	0	0	0	0	0	0	0	0	0	0	0	0	0	0	0	0	0	0	0	0	0	0	0	0	0	0	0	0	0	0	0	0	0	0	0	0	0	0
2.54543	32.725	30.3906	0				0	0	0	0	0	0	0	0	0	0	0	0	0	0	0	0	0	0	0	0	0	0	0	0	0	0	0	0	0	0	0	0	0	0	0	0	0	0	0	0	0	0	0
2.54745	32.6896	30.5184	0				0	0	0	0	0	0	0	0	0	0	0	0	0	0	0	0	0	0	0	0	0	0	0	0	0	0	0	0	0	0	0	0	0	0	0	0	0	0	0	0	0	0	0
2.54947	32.6546	30.5311	0				0	0	0	0	0	0	0	0	0	0	0	0	0	0	0	0	0	0	0	0	0	0	0	0	0	0	0	0	0	0	0	0	0	0	0	0	0	0	0	0	0	0	0
2.55149	32.6315	30.2689	0				0	0	0	0	0	0	0	0	0	0	0	0	0	0	0	0	0	0	0	0	0	0	0	0	0	0	0	0	0	0	0	0	0	0	0	0	0	0	0	0	0	0	0
2.55352	32.6041	30.123	0				0	0	0	0	0	0	0	0	0	0	0	0	0	0	0	0	0	0	0	0	0	0	0	0	0	0	0	0	0	0	0	0	0	0	0	0	0	0	0	0	0	0	0
2.55554	32.9313	30.3236	0				0	0	0	0	0	0	0	0	0	0	0	0	0	0	0	0	0	0	0	0	0	0	0	0	0	0	0	0	0	0	0	0	0	0	0	0	0	0	0	0	0	0	0
2.55756	32.9228	30.3668	0				0	0	0	0	0	0	0	0	0	0	0	0	0	0	0	0	0	0	0	0	0	0	0	0	0	0	0	0	0	0	0	0	0	0	0	0	0	0	0	0	0	0	0
2.55959	32.6863	30.2418	0				0	0	0	0	0	0	0	0	0	0	0	0	0	0	0	0	0	0	0	0	0	0	0	0	0	0	0	0	0	0	0	0	0	0	0	0	0	0	0	0	0	0	0
2.56161	32.7531	30.2695	0				0	0	0	0	0	0	0	0	0	0	0	0	0	0	0	0	0	0	0	0	0	0	0	0	0	0	0	0	0	0	0	0	0	0	0	0	0	0	0	0	0	0	0
2.56363	32.7495	30.361	0				0	0	0	0	0	0	0	0	0	0	0	0	0	0	0	0	0	0	0	0	0	0	0	0	0	0	0	0	0	0	0	0	0	0	0	0	0	0	0	0	0	0	0
2.56565	32.7964	30.3826	0				0	0	0	0	0	0	0	0	0	0	0	0	0	0	0	0	0	0	0	0	0	0	0	0	0	0	0	0	0	0	0	0	0	0	0	0	0	0	0	0	0	0	0
2.56768	32.7132	30.6115	0				0	0	0	0	0	0	0	0	0	0	0	0	0	0	0	0	0	0	0	0	0	0	0	0	0	0	0	0	0	0	0	0	0	0	0	0	0	0	0	0	0	0	0
2.5697	32.6497	30.5535	0				0	0	0	0	0	0	0	0	0	0	0	0	0	0	0	0	0	0	0	0	0	0	0	0	0	0	0	0	0	0	0	0	0	0	0	0	0	0	0	0	0	0	0
2.57172	32.6028	30.3136	0				0	0	0	0	0	0	0	0	0	0	0	0	0	0	0	0	0	0	0	0	0	0	0	0	0	0	0	0	0	0	0	0	0	0	0	0	0	0	0	0	0	0	0
2.57374	32.798	30.3947	0				0	0	0	0	0	0	0	0	0	0	0	0	0	0	0	0	0	0	0	0	0	0	0	0	0	0	0	0	0	0	0	0	0	0	0	0	0	0	0	0	0	0	0
2.57577	32.7663	30.3769	0				0	0	0	0	0	0	0	0	0	0	0	0	0	0	0	0	0	0	0	0	0	0	0	0	0	0	0	0	0	0	0	0	0	0	0	0	0	0	0	0	0	0	0
2.57779	32.4948	30.368	0				0	0	0	0	0	0	0	0	0	0	0	0	0	0	0	0	0	0	0	0	0	0	0	0	0	0	0	0	0	0	0	0	0	0	0	0	0	0	0	0	0	0	0
2.57981	32.5919	30.2239	0				0	0	0	0	0	0	0	0	0	0	0	0	0	0	0	0	0	0	0	0	0	0	0	0	0	0	0	0	0	0	0	0	0	0	0	0	0	0	0	0	0	0	0
2.58183	32.5614	30.1337	0				0	0	0	0	0	0	0	0	0	0	0	0	0	0	0	0	0	0	0	0	0	0	0	0	0	0	0	0	0	0	0	0	0	0	0	0	0	0	0	0	0	0	0
2.58386	32.6164	30.3427	0				0	0	0	0	0	0	0	0	0	0	0	0	0	0	0	0	0	0	0	0	0	0	0	0	0	0	0	0	0	0	0	0	0	0	0	0	0	0	0	0	0	0	0
2.58588	32.7028	30.3652	0				0	0	0	0	0	0	0	0	0	0	0	0	0	0	0	0	0	0	0	0	0	0	0	0	0	0	0	0	0	0	0	0	0	0	0	0	0	0	0	0	0	0	0
2.5879	32.74	30.2876	0				0	0	0	0	0	0	0	0	0	0	0	0	0	0	0	0	0	0	0	0	0	0	0	0	0	0	0	0	0	0	0	0	0	0	0	0	0	0	0	0	0	0	0
2.58992	32.7574	30.2172	0				0	0	0	0	0	0	0	0	0	0	0	0	0	0	0	0	0	0	0	0	0	0	0	0	0	0	0	0	0	0	0	0	0	0	0	0	0	0	0	0	0	0	0
2.59195	32.8366	30.2579	0				0	0	0	0	0	0	0	0	0	0	0	0	0	0	0	0	0	0	0	0	0	0	0	0	0	0	0	0	0	0	0	0	0	0	0	0	0	0	0	0	0	0	0
2.59397	32.7733	30.1035	0				0	0	0	0	0	0	0	0	0	0	0	0	0	0	0	0	0	0	0	0	0	0	0	0	0	0	0	0	0	0	0	0	0	0	0	0	0	0	0	0	0	0	0
2.59599	32.8029	30.0631	0				0	0	0	0	0	0	0	0	0	0	0	0	0	0	0	0	0	0	0	0	0	0	0	0	0	0	0	0	0	0	0	0	0	0	0	0	0	0	0	0	0	0	0
2.59801	32.9188	30.2195	0				0	0	0	0	0	0	0	0	0	0	0	0	0	0	0	0	0	0	0	0	0	0	0	0	0	0	0	0	0	0	0	0	0	0	0	0	0	0	0	0	0	0	0
2.60004	32.9656	30.3754	0				0	0	0	0	0	0	0	0	0	0	0	0	0	0	0	0	0	0	0	0	0	0	0	0	0	0	0	0	0	0	0	0	0	0	0	0	0	0	0	0	0	0	0
2.60206	32.8857	30.2721	0				0	0	0	0	0	0	0	0	0	0	0	0	0	0	0	0	0	0	0	0	0	0	0	0	0	0	0	0	0	0	0	0	0	0	0	0	0	0	0	0	0	0	0
2.60408	32.8731	30.3371	0				0	0	0	0	0	0	0	0	0	0	0	0	0	0	0	0	0	0	0	0	0	0	0	0	0	0	0	0	0	0	0	0	0	0	0	0	0	0	0	0	0	0	0
2.6061	32.8378	30.3452	0				0	0	0	0	0	0	0	0	0	0	0	0	0	0	0	0	0	0	0	0	0	0	0	0	0	0	0	0	0	0	0	0	0	0	0	0	0	0	0	0	0	0	0
2.60813	32.9665	30.3919	0				0	0	0	0	0	0	0	0	0	0	0	0	0	0	0	0	0	0	0	0	0	0	0	0	0	0	0	0	0	0	0	0	0	0	0	0	0	0	0	0	0	0	0
2.61015	32.9772	30.3769	0				0	0	0	0	0	0	0	0	0	0	0	0	0	0	0	0	0	0	0	0	0	0	0	0	0	0	0	0	0	0	0	0	0	0	0	0	0	0	0	0	0	0	0
2.61217	32.8967	30.3935	0				0	0	0	0	0	0	0	0	0	0	0	0	0	0	0	0	0	0	0	0	0	0	0	0	0	0	0	0	0	0	0	0	0	0	0	0	0	0	0	0	0	0	0
2.61419	32.8063	30.3975	0				0	0	0	0	0	0	0	0	0	0	0	0	0	0	0	0	0	0	0	0	0	0	0	0	0	0	0	0	0	0	0	0	0	0	0	0	0	0	0	0	0	0	0
2.61622	32.8049	30.4146	0				0	0	0	0	0	0	0	0	0	0	0	0	0	0	0	0	0	0	0	0	0	0	0	0	0	0	0	0	0	0	0	0	0	0	0	0	0	0	0	0	0	0	0
2.61824	32.8625	30.4151	0				0	0	0	0	0	0	0	0	0	0	0	0	0	0	0	0	0	0	0	0	0	0	0	0	0	0	0	0	0	0	0	0	0	0	0	0	0	0	0	0	0	0	0
2.62026	32.8184	30.3733	0				0	0	0	0	0	0	0	0	0	0	0	0	0	0	0	0	0	0	0	0	0	0	0	0	0	0	0	0	0	0	0	0	0	0	0	0	0	0	0	0	0	0	0
2.62229	32.859	30.3378	0				0	0	0	0	0	0	0	0	0	0	0	0	0	0	0	0	0	0	0	0	0	0	0	0	0	0	0	0	0	0	0	0	0	0	0	0	0	0	0	0	0	0	0
2.62431	32.7567	30.2849	0				0	0	0	0	0	0	0	0	0	0	0	0	0	0	0	0	0	0	0	0	0	0	0	0	0	0	0	0	0	0	0	0	0	0	0	0	0	0	0	0	0	0	0
2.62633	32.6314	30.207	0				0	0	0	0	0	0	0	0	0	0	0	0	0	0	0	0	0	0	0	0	0	0	0	0	0	0	0	0	0	0	0	0	0	0	0	0	0	0	0	0	0	0	0
2.62835	32.696	30.2703	0				0	0	0	0	0	0	0	0	0	0	0	0	0	0	0	0	0	0	0	0	0	0	0	0	0	0	0	0	0	0	0	0	0	0	0	0	0	0	0	0	0	0	0
2.63038	32.7849	30.31	0				0	0	0	0	0	0	0	0	0	0	0	0	0	0	0	0	0	0	0	0	0	0	0	0	0	0	0	0	0	0	0	0	0	0	0	0	0	0	0	0	0	0	0
2.6324	32.8422	30.3471	0				0	0	0	0	0	0	0	0	0	0	0	0	0	0	0	0	0	0	0	0	0	0	0	0	0	0	0	0	0	0	0	0	0	0	0	0	0	0	0	0	0	0	0
2.63442	32.7959	30.2624	0				0	0	0	0	0	0	0	0	0	0	0	0	0	0	0	0	0	0	0	0	0	0	0	0	0	0	0	0	0	0	0	0	0	0	0	0	0	0	0	0	0	0	0
2.63644	32.6997	30.2397	0				0	0	0	0	0	0	0	0	0	0	0	0	0	0	0	0	0	0	0	0	0	0	0	0	0	0	0	0	0	0	0	0	0	0	0	0	0	0	0	0	0	0	0
2.63847	32.6138	30.3632	0				0	0	0	0	0	0	0	0	0	0	0	0	0	0	0	0	0	0	0	0	0	0	0	0	0	0	0	0	0	0	0	0	0	0	0	0	0	0	0	0	0	0	0
2.64049	32.6968	30.3919	0				0	0	0	0	0	0	0	0	0	0	0	0	0	0	0	0	0	0	0	0	0	0	0	0	0	0	0	0	0	0	0	0	0	0	0	0	0	0	0	0	0	0	0
2.64251	32.8239	30.2962	0				0	0	0	0	0	0	0	0	0	0	0	0	0	0	0	0	0	0	0	0	0	0	0	0	0	0	0	0	0	0	0	0	0	0	0	0	0	0	0	0	0	0	0
2.64453	32.7044	30.287	0				0	0	0	0	0	0	0	0	0	0	0	0	0	0	0	0	0	0	0	0	0	0	0	0	0	0	0	0	0	0	0	0	0	0	0	0	0	0	0	0	0	0	0
2.64656	32.5433	30.2144	0				0	0	0	0	0	0	0	0	0	0	0	0	0	0	0	0	0	0	0	0	0	0	0	0	0	0	0	0	0	0	0	0	0	0	0	0	0	0	0	0	0	0	0
2.64858	32.6285	30.2219	0				0	0	0	0	0	0	0	0	0	0	0	0	0	0	0	0	0	0	0	0	0	0	0	0	0	0	0	0	0	0	0	0	0	0	0	0	0	0	0	0	0	0	0
2.6506	32.6359	30.3724	0				0	0	0	0	0	0	0	0	0	0	0	0	0	0	0	0	0	0	0	0	0	0	0	0	0	0	0	0	0	0	0	0	0	0	0	0	0	0	0	0	0	0	0
2.65262	32.4881	30.3077	0				0	0	0	0	0	0	0	0	0	0	0	0	0	0	0	0	0	0	0	0	0	0	0	0	0	0	0	0	0	0	0	0	0	0	0	0	0	0	0	0	0	0	0
2.65465	32.5175	30.1772	0				0	0	0	0	0	0	0	0	0	0	0	0	0	0	0	0	0	0	0	0	0	0	0	0	0	0	0	0	0	0	0	0	0	0	0	0	0	0	0	0	0	0	0
2.65667	32.5854	30.1762	0				0	0	0	0	0	0	0	0	0	0	0	0	0	0	0	0	0	0	0	0	0	0	0	0	0	0	0	0	0	0	0	0	0	0	0	0	0	0	0	0	0	0	0
2.65869	32.6873	30.2155	0				0	0	0	0	0	0	0	0	0	0	0	0	0	0	0	0	0	0	0	0	0	0	0	0	0	0	0	0	0	0	0	0	0	0	0	0	0	0	0	0	0	0	0
2.66071	32.743	30.3242	0				0	0	0	0	0	0	0	0	0	0	0	0	0	0	0	0	0	0	0	0	0	0	0	0	0	0	0	0	0	0	0	0	0	0	0	0	0	0	0	0	0	0	0
2.66274	32.6998	30.3208	0				0	0	0	0	0	0	0	0	0	0	0	0	0	0	0	0	0	0	0	0	0	0	0	0	0	0	0	0	0	0	0	0	0	0	0	0	0	0	0	0	0	0	0
2.66476	32.8017	30.2496	0				0	0	0	0	0	0	0	0	0	0	0	0	0	0	0	0	0	0	0	0	0	0	0	0	0	0	0	0	0	0	0	0	0	0	0	0	0	0	0	0	0	0	0
2.66678	32.8923	30.3118	0				0	0	0	0	0	0	0	0	0	0	0	0	0	0	0	0	0	0	0	0	0	0	0	0	0	0	0	0	0	0	0	0	0	0	0	0	0	0	0	0	0	0	0
2.6688	32.8427	30.2283	0				0	0	0	0	0	0	0	0	0	0	0	0	0	0	0	0	0	0	0	0	0	0	0	0	0	0	0	0	0	0	0	0	0	0	0	0	0	0	0	0	0	0	0
2.67083	32.7279	30.2396	0				0	0	0	0	0	0	0	0	0	0	0	0	0	0	0	0	0	0	0	0	0	0	0	0	0	0	0	0	0	0	0	0	0	0	0	0	0	0	0	0	0	0	0
2.67285	32.6791	30.2913	0				0	0	0	0	0	0	0	0	0	0	0	0	0	0	0	0	0	0	0	0	0	0	0	0	0	0	0	0	0	0	0	0	0	0	0	0	0	0	0	0	0	0	0
2.67487	32.707	30.2808	0				0	0	0	0	0	0	0	0	0	0	0	0	0	0	0	0	0	0	0	0	0	0	0	0	0	0	0	0	0	0	0	0	0	0	0	0	0	0	0	0	0	0	0
2.6769	32.7034	30.1997	0				0	0	0	0	0	0	0	0	0	0	0	0	0	0	0	0	0	0	0	0	0	0	0	0	0	0	0	0	0	0	0	0	0	0	0	0	0	0	0	0	0	0	0
2.67892	32.6298	30.1894	0				0	0	0	0	0	0	0	0	0	0	0	0	0	0	0	0	0	0	0	0	0	0	0	0	0	0	0	0	0	0	0	0	0	0	0	0	0	0	0	0	0	0	0
2.68094	32.6262	30.2058	0				0	0	0	0	0	0	0	0	0	0	0	0	0	0	0	0	0	0	0	0	0	0	0	0	0	0	0	0	0	0	0	0	0	0	0	0	0	0	0	0	0	0	0
2.68296	32.6044	30.1719	0				0	0	0	0	0	0	0	0	0	0	0	0	0	0	0	0	0	0	0	0	0	0	0	0	0	0	0	0	0	0	0	0	0	0	0	0	0	0	0	0	0	0	0
2.68499	32.7042	30.1738	0				0	0	0	0	0	0	0	0	0	0	0	0	0	0	0	0	0	0	0	0	0	0	0	0	0	0	0	0	0	0	0	0	0	0	0	0	0	0	0	0	0	0	0
2.68701	32.7392	30.0908	0				0	0	0	0	0	0	0	0	0	0	0	0	0	0	0	0	0	0	0	0	0	0	0	0	0	0	0	0	0	0	0	0	0	0	0	0	0	0	0	0	0	0	0
2.68903	32.6193	29.991	0				0	0	0	0	0	0	0	0	0	0	0	0	0	0	0	0	0	0	0	0	0	0	0	0	0	0	0	0	0	0	0	0	0	0	0	0	0	0	0	0	0	0	0
2.69105	32.4681	30.0715	0				0	0	0	0	0	0	0	0	0	0	0	0	0	0	0	0	0	0	0	0	0	0	0	0	0	0	0	0	0	0	0	0	0	0	0	0	0	0	0	0	0	0	0
2.69308	32.5179	30.1028	0				0	0	0	0	0	0	0	0	0	0	0	0	0	0	0	0	0	0	0	0	0	0	0	0	0	0	0	0	0	0	0	0	0	0	0	0	0	0	0	0	0	0	0
2.6951	32.5436	30.0576	0				0	0	0	0	0	0	0	0	0	0	0	0	0	0	0	0	0	0	0	0	0	0	0	0	0	0	0	0	0	0	0	0	0	0	0	0	0	0	0	0	0	0	0
2.69712	32.6091	30.2013	0				0	0	0	0	0	0	0	0	0	0	0	0	0	0	0	0	0	0	0	0	0	0	0	0	0	0	0	0	0	0	0	0	0	0	0	0	0	0	0	0	0	0	0
2.69914	32.6184	30.2707	0				0	0	0	0	0	0	0	0	0	0	0	0	0	0	0	0	0	0	0	0	0	0	0	0	0	0	0	0	0	0	0	0	0	0	0	0	0	0	0	0	0	0	0
2.70117	32.5533	30.0751	0				0	0	0	0	0	0	0	0	0	0	0	0	0	0	0	0	0	0	0	0	0	0	0	0	0	0	0	0	0	0	0	0	0	0	0	0	0	0	0	0	0	0	0
2.70319	32.6726	29.9794	0				0	0	0	0	0	0	0	0	0	0	0	0	0	0	0	0	0	0	0	0	0	0	0	0	0	0	0	0	0	0	0	0	0	0	0	0	0	0	0	0	0	0	0
2.70521	32.8455	30.1364	0				0	0	0	0	0	0	0	0	0	0	0	0	0	0	0	0	0	0	0	0	0	0	0	0	0	0	0	0	0	0	0	0	0	0	0	0	0	0	0	0	0	0	0
2.70723	32.7189	30.207	0				0	0	0	0	0	0	0	0	0	0	0	0	0	0	0	0	0	0	0	0	0	0	0	0	0	0	0	0	0	0	0	0	0	0	0	0	0	0	0	0	0	0	0
2.70926	32.6779	30.2391	0				0	0	0	0	0	0	0	0	0	0	0	0	0	0	0	0	0	0	0	0	0	0	0	0	0	0	0	0	0	0	0	0	0	0	0	0	0	0	0	0	0	0	0
2.71128	32.6374	30.2319	0				0	0	0	0	0	0	0	0	0	0	0	0	0	0	0	0	0	0	0	0	0	0	0	0	0	0	0	0	0	0	0	0	0	0	0	0	0	0	0	0	0	0	0
2.7133	32.6109	30.1581	0				0	0	0	0	0	0	0	0	0	0	0	0	0	0	0	0	0	0	0	0	0	0	0	0	0	0	0	0	0	0	0	0	0	0	0	0	0	0	0	0	0	0	0
2.71532	32.7306	30.1945	0				0	0	0	0	0	0	0	0	0	0	0	0	0	0	0	0	0	0	0	0	0	0	0	0	0	0	0	0	0	0	0	0	0	0	0	0	0	0	0	0	0	0	0
2.71735	32.7487	30.1429	0				0	0	0	0	0	0	0	0	0	0	0	0	0	0	0	0	0	0	0	0	0	0	0	0	0	0	0	0	0	0	0	0	0	0	0	0	0	0	0	0	0	0	0
2.71937	32.723	30.0935	0				0	0	0	0	0	0	0	0	0	0	0	0	0	0	0	0	0	0	0	0	0	0	0	0	0	0	0	0	0	0	0	0	0	0	0	0	0	0	0	0	0	0	0
2.72139	32.7092	30.1398	0				0	0	0	0	0	0	0	0	0	0	0	0	0	0	0	0	0	0	0	0	0	0	0	0	0	0	0	0	0	0	0	0	0	0	0	0	0	0	0	0	0	0	0
2.72341	32.7722	30.1472	0				0	0	0	0	0	0	0	0	0	0	0	0	0	0	0	0	0	0	0	0	0	0	0	0	0	0	0	0	0	0	0	0	0	0	0	0	0	0	0	0	0	0	0
2.72544	32.6808	30.0402	0				0	0	0	0	0	0	0	0	0	0	0	0	0	0	0	0	0	0	0	0	0	0	0	0	0	0	0	0	0	0	0	0	0	0	0	0	0	0	0	0	0	0	0
2.72746	32.9716	30.0186	0				0	0	0	0	0	0	0	0	0	0	0	0	0	0	0	0	0	0	0	0	0	0	0	0	0	0	0	0	0	0	0	0	0	0	0	0	0	0	0	0	0	0	0
2.72948	33.1041	30.1842	0				0	0	0	0	0	0	0	0	0	0	0	0	0	0	0	0	0	0	0	0	0	0	0	0	0	0	0	0	0	0	0	0	0	0	0	0	0	0	0	0	0	0	0
2.7315	32.9585	30.2136	0				0	0	0	0	0	0	0	0	0	0	0	0	0	0	0	0	0	0	0	0	0	0	0	0	0	0	0	0	0	0	0	0	0	0	0	0	0	0	0	0	0	0	0
2.73353	32.7321	30.2298	0				0	0	0	0	0	0	0	0	0	0	0	0	0	0	0	0	0	0	0	0	0	0	0	0	0	0	0	0	0	0	0	0	0	0	0	0	0	0	0	0	0	0	0
2.73555	32.6061	30.1133	0				0	0	0	0	0	0	0	0	0	0	0	0	0	0	0	0	0	0	0	0	0	0	0	0	0	0	0	0	0	0	0	0	0	0	0	0	0	0	0	0	0	0	0
2.73757	32.61	29.8964	0				0	0	0	0	0	0	0	0	0	0	0	0	0	0	0	0	0	0	0	0	0	0	0	0	0	0	0	0	0	0	0	0	0	0	0	0	0	0	0	0	0	0	0
2.7396	32.6692	29.8873	0				0	0	0	0	0	0	0	0	0	0	0	0	0	0	0	0	0	0	0	0	0	0	0	0	0	0	0	0	0	0	0	0	0	0	0	0	0	0	0	0	0	0	0
2.74162	32.6246	29.8322	0				0	0	0	0	0	0	0	0	0	0	0	0	0	0	0	0	0	0	0	0	0	0	0	0	0	0	0	0	0	0	0	0	0	0	0	0	0	0	0	0	0	0	0
2.74364	32.7406	29.8629	0				0	0	0	0	0	0	0	0	0	0	0	0	0	0	0	0	0	0	0	0	0	0	0	0	0	0	0	0	0	0	0	0	0	0	0	0	0	0	0	0	0	0	0
2.74566	32.877	30.0904	0				0	0	0	0	0	0	0	0	0	0	0	0	0	0	0	0	0	0	0	0	0	0	0	0	0	0	0	0	0	0	0	0	0	0	0	0	0	0	0	0	0	0	0
2.74769	32.7811	30.2024	0				0	0	0	0	0	0	0	0	0	0	0	0	0	0	0	0	0	0	0	0	0	0	0	0	0	0	0	0	0	0	0	0	0	0	0	0	0	0	0	0	0	0	0
2.74971	32.8355	30.1691	0				0	0	0	0	0	0	0	0	0	0	0	0	0	0	0	0	0	0	0	0	0	0	0	0	0	0	0	0	0	0	0	0	0	0	0	0	0	0	0	0	0	0	0
2.75173	32.6923	29.9724	0				0	0	0	0	0	0	0	0	0	0	0	0	0	0	0	0	0	0	0	0	0	0	0	0	0	0	0	0	0	0	0	0	0	0	0	0	0	0	0	0	0	0	0
2.75375	32.6356	30.1151	0				0	0	0	0	0	0	0	0	0	0	0	0	0	0	0	0	0	0	0	0	0	0	0	0	0	0	0	0	0	0	0	0	0	0	0	0	0	0	0	0	0	0	0
2.75578	32.6085	30.1061	0				0	0	0	0	0	0	0	0	0	0	0	0	0	0	0	0	0	0	0	0	0	0	0	0	0	0	0	0	0	0	0	0	0	0	0	0	0	0	0	0	0	0	0
2.7578	32.6533	29.9196	0				0	0	0	0	0	0	0	0	0	0	0	0	0	0	0	0	0	0	0	0	0	0	0	0	0	0	0	0	0	0	0	0	0	0	0	0	0	0	0	0	0	0	0
2.75982	32.6678	29.9855	0				0	0	0	0	0	0	0	0	0	0	0	0	0	0	0	0	0	0	0	0	0	0	0	0	0	0	0	0	0	0	0	0	0	0	0	0	0	0	0	0	0	0	0
2.76184	32.716	30.1331	0				0	0	0	0	0	0	0	0	0	0	0	0	0	0	0	0	0	0	0	0	0	0	0	0	0	0	0	0	0	0	0	0	0	0	0	0	0	0	0	0	0	0	0
2.76387	32.6177	30.1826	0				0	0	0	0	0	0	0	0	0	0	0	0	0	0	0	0	0	0	0	0	0	0	0	0	0	0	0	0	0	0	0	0	0	0	0	0	0	0	0	0	0	0	0
2.76589	32.5333	30.1153	0				0	0	0	0	0	0	0	0	0	0	0	0	0	0	0	0	0	0	0	0	0	0	0	0	0	0	0	0	0	0	0	0	0	0	0	0	0	0	0	0	0	0	0
2.76791	32.6286	29.9569	0				0	0	0	0	0	0	0	0	0	0	0	0	0	0	0	0	0	0	0	0	0	0	0	0	0	0	0	0	0	0	0	0	0	0	0	0	0	0	0	0	0	0	0
2.76993	32.6244	30.0224	0				0	0	0	0	0	0	0	0	0	0	0	0	0	0	0	0	0	0	0	0	0	0	0	0	0	0	0	0	0	0	0	0	0	0	0	0	0	0	0	0	0	0	0
2.77196	32.5065	30.0724	0				0	0	0	0	0	0	0	0	0	0	0	0	0	0	0	0	0	0	0	0	0	0	0	0	0	0	0	0	0	0	0	0	0	0	0	0	0	0	0	0	0	0	0
2.77398	32.55	30.1293	0				0	0	0	0	0	0	0	0	0	0	0	0	0	0	0	0	0	0	0	0	0	0	0	0	0	0	0	0	0	0	0	0	0	0	0	0	0	0	0	0	0	0	0
2.776	32.6939	30.2298	0				0	0	0	0	0	0	0	0	0	0	0	0	0	0	0	0	0	0	0	0	0	0	0	0	0	0	0	0	0	0	0	0	0	0	0	0	0	0	0	0	0	0	0
2.77802	32.8885	30.26	0				0	0	0	0	0	0	0	0	0	0	0	0	0	0	0	0	0	0	0	0	0	0	0	0	0	0	0	0	0	0	0	0	0	0	0	0	0	0	0	0	0	0	0
2.78005	32.887	30.2299	0				0	0	0	0	0	0	0	0	0	0	0	0	0	0	0	0	0	0	0	0	0	0	0	0	0	0	0	0	0	0	0	0	0	0	0	0	0	0	0	0	0	0	0
2.78207	32.7176	30.2143	0				0	0	0	0	0	0	0	0	0	0	0	0	0	0	0	0	0	0	0	0	0	0	0	0	0	0	0	0	0	0	0	0	0	0	0	0	0	0	0	0	0	0	0
2.78409	32.7257	30.1019	0				0	0	0	0	0	0	0	0	0	0	0	0	0	0	0	0	0	0	0	0	0	0	0	0	0	0	0	0	0	0	0	0	0	0	0	0	0	0	0	0	0	0	0
2.78611	32.6016	29.9642	0				0	0	0	0	0	0	0	0	0	0	0	0	0	0	0	0	0	0	0	0	0	0	0	0	0	0	0	0	0	0	0	0	0	0	0	0	0	0	0	0	0	0	0
2.78814	32.5617	29.995	0				0	0	0	0	0	0	0	0	0	0	0	0	0	0	0	0	0	0	0	0	0	0	0	0	0	0	0	0	0	0	0	0	0	0	0	0	0	0	0	0	0	0	0
2.79016	32.6525	30.2081	0				0	0	0	0	0	0	0	0	0	0	0	0	0	0	0	0	0	0	0	0	0	0	0	0	0	0	0	0	0	0	0	0	0	0	0	0	0	0	0	0	0	0	0
2.79218	32.8145	30.1683	0				0	0	0	0	0	0	0	0	0	0	0	0	0	0	0	0	0	0	0	0	0	0	0	0	0	0	0	0	0	0	0	0	0	0	0	0	0	0	0	0	0	0	0
2.79421	32.9511	30.0369	0				0	0	0	0	0	0	0	0	0	0	0	0	0	0	0	0	0	0	0	0	0	0	0	0	0	0	0	0	0	0	0	0	0	0	0	0	0	0	0	0	0	0	0
2.79623	32.7633	30.0039	0				0	0	0	0	0	0	0	0	0	0	0	0	0	0	0	0	0	0	0	0	0	0	0	0	0	0	0	0	0	0	0	0	0	0	0	0	0	0	0	0	0	0	0
2.79825	32.7199	30.0524	0				0	0	0	0	0	0	0	0	0	0	0	0	0	0	0	0	0	0	0	0	0	0	0	0	0	0	0	0	0	0	0	0	0	0	0	0	0	0	0	0	0	0	0
2.80027	32.6974	30.0616	0				0	0	0	0	0	0	0	0	0	0	0	0	0	0	0	0	0	0	0	0	0	0	0	0	0	0	0	0	0	0	0	0	0	0	0	0	0	0	0	0	0	0	0
2.8023	32.6977	30.0166	0				0	0	0	0	0	0	0	0	0	0	0	0	0	0	0	0	0	0	0	0	0	0	0	0	0	0	0	0	0	0	0	0	0	0	0	0	0	0	0	0	0	0	0
2.80432	32.6435	30.021	0				0	0	0	0	0	0	0	0	0	0	0	0	0	0	0	0	0	0	0	0	0	0	0	0	0	0	0	0	0	0	0	0	0	0	0	0	0	0	0	0	0	0	0
2.80634	32.4898	30.1048	0				0	0	0	0	0	0	0	0	0	0	0	0	0	0	0	0	0	0	0	0	0	0	0	0	0	0	0	0	0	0	0	0	0	0	0	0	0	0	0	0	0	0	0
2.80836	32.6138	30.1961	0				0	0	0	0	0	0	0	0	0	0	0	0	0	0	0	0	0	0	0	0	0	0	0	0	0	0	0	0	0	0	0	0	0	0	0	0	0	0	0	0	0	0	0
2.81039	32.9015	30.2131	0				0	0	0	0	0	0	0	0	0	0	0	0	0	0	0	0	0	0	0	0	0	0	0	0	0	0	0	0	0	0	0	0	0	0	0	0	0	0	0	0	0	0	0
2.81241	32.7422	30.1273	0				0	0	0	0	0	0	0	0	0	0	0	0	0	0	0	0	0	0	0	0	0	0	0	0	0	0	0	0	0	0	0	0	0	0	0	0	0	0	0	0	0	0	0
2.81443	32.6732	30.2051	0				0	0	0	0	0	0	0	0	0	0	0	0	0	0	0	0	0	0	0	0	0	0	0	0	0	0	0	0	0	0	0	0	0	0	0	0	0	0	0	0	0	0	0
2.81645	32.585	30.0825	0				0	0	0	0	0	0	0	0	0	0	0	0	0	0	0	0	0	0	0	0	0	0	0	0	0	0	0	0	0	0	0	0	0	0	0	0	0	0	0	0	0	0	0
2.81848	32.526	30.0267	0				0	0	0	0	0	0	0	0	0	0	0	0	0	0	0	0	0	0	0	0	0	0	0	0	0	0	0	0	0	0	0	0	0	0	0	0	0	0	0	0	0	0	0
2.8205	32.6071	30.1341	0				0	0	0	0	0	0	0	0	0	0	0	0	0	0	0	0	0	0	0	0	0	0	0	0	0	0	0	0	0	0	0	0	0	0	0	0	0	0	0	0	0	0	0
2.82252	32.7568	30.3165	0				0	0	0	0	0	0	0	0	0	0	0	0	0	0	0	0	0	0	0	0	0	0	0	0	0	0	0	0	0	0	0	0	0	0	0	0	0	0	0	0	0	0	0
2.82454	32.766	30.2299	0				0	0	0	0	0	0	0	0	0	0	0	0	0	0	0	0	0	0	0	0	0	0	0	0	0	0	0	0	0	0	0	0	0	0	0	0	0	0	0	0	0	0	0
2.82657	32.7187	30.0458	0				0	0	0	0	0	0	0	0	0	0	0	0	0	0	0	0	0	0	0	0	0	0	0	0	0	0	0	0	0	0	0	0	0	0	0	0	0	0	0	0	0	0	0
2.82859	32.7154	30.1658	0				0	0	0	0	0	0	0	0	0	0	0	0	0	0	0	0	0	0	0	0	0	0	0	0	0	0	0	0	0	0	0	0	0	0	0	0	0	0	0	0	0	0	0
2.83061	32.4937	30.2911	0				0	0	0	0	0	0	0	0	0	0	0	0	0	0	0	0	0	0	0	0	0	0	0	0	0	0	0	0	0	0	0	0	0	0	0	0	0	0	0	0	0	0	0
2.83263	32.5752	30.278	0				0	0	0	0	0	0	0	0	0	0	0	0	0	0	0	0	0	0	0	0	0	0	0	0	0	0	0	0	0	0	0	0	0	0	0	0	0	0	0	0	0	0	0
2.83466	32.5962	30.0799	0				0	0	0	0	0	0	0	0	0	0	0	0	0	0	0	0	0	0	0	0	0	0	0	0	0	0	0	0	0	0	0	0	0	0	0	0	0	0	0	0	0	0	0
2.83668	32.5967	30.0641	0				0	0	0	0	0	0	0	0	0	0	0	0	0	0	0	0	0	0	0	0	0	0	0	0	0	0	0	0	0	0	0	0	0	0	0	0	0	0	0	0	0	0	0
2.8387	32.7686	30.1849	0				0	0	0	0	0	0	0	0	0	0	0	0	0	0	0	0	0	0	0	0	0	0	0	0	0	0	0	0	0	0	0	0	0	0	0	0	0	0	0	0	0	0	0
2.84072	32.8461	30.2411	0				0	0	0	0	0	0	0	0	0	0	0	0	0	0	0	0	0	0	0	0	0	0	0	0	0	0	0	0	0	0	0	0	0	0	0	0	0	0	0	0	0	0	0
2.84275	32.8095	30.1429	0				0	0	0	0	0	0	0	0	0	0	0	0	0	0	0	0	0	0	0	0	0	0	0	0	0	0	0	0	0	0	0	0	0	0	0	0	0	0	0	0	0	0	0
2.84477	32.8291	29.9784	0				0	0	0	0	0	0	0	0	0	0	0	0	0	0	0	0	0	0	0	0	0	0	0	0	0	0	0	0	0	0	0	0	0	0	0	0	0	0	0	0	0	0	0
2.84679	32.7287	30.017	0				0	0	0	0	0	0	0	0	0	0	0	0	0	0	0	0	0	0	0	0	0	0	0	0	0	0	0	0	0	0	0	0	0	0	0	0	0	0	0	0	0	0	0
2.84882	32.7259	29.9569	0				0	0	0	0	0	0	0	0	0	0	0	0	0	0	0	0	0	0	0	0	0	0	0	0	0	0	0	0	0	0	0	0	0	0	0	0	0	0	0	0	0	0	0
2.85084	32.7043	29.8823	0				0	0	0	0	0	0	0	0	0	0	0	0	0	0	0	0	0	0	0	0	0	0	0	0	0	0	0	0	0	0	0	0	0	0	0	0	0	0	0	0	0	0	0
2.85286	32.7607	29.9613	0				0	0	0	0	0	0	0	0	0	0	0	0	0	0	0	0	0	0	0	0	0	0	0	0	0	0	0	0	0	0	0	0	0	0	0	0	0	0	0	0	0	0	0
2.85488	32.6966	30.1139	0				0	0	0	0	0	0	0	0	0	0	0	0	0	0	0	0	0	0	0	0	0	0	0	0	0	0	0	0	0	0	0	0	0	0	0	0	0	0	0	0	0	0	0
2.85691	32.5564	30.1204	0				0	0	0	0	0	0	0	0	0	0	0	0	0	0	0	0	0	0	0	0	0	0	0	0	0	0	0	0	0	0	0	0	0	0	0	0	0	0	0	0	0	0	0
2.85893	32.6318	30.1106	0				0	0	0	0	0	0	0	0	0	0	0	0	0	0	0	0	0	0	0	0	0	0	0	0	0	0	0	0	0	0	0	0	0	0	0	0	0	0	0	0	0	0	0
2.86095	32.7415	30.15	0				0	0	0	0	0	0	0	0	0	0	0	0	0	0	0	0	0	0	0	0	0	0	0	0	0	0	0	0	0	0	0	0	0	0	0	0	0	0	0	0	0	0	0
2.86297	32.7223	30.2522	0				0	0	0	0	0	0	0	0	0	0	0	0	0	0	0	0	0	0	0	0	0	0	0	0	0	0	0	0	0	0	0	0	0	0	0	0	0	0	0	0	0	0	0
2.865	32.7482	30.1593	0				0	0	0	0	0	0	0	0	0	0	0	0	0	0	0	0	0	0	0	0	0	0	0	0	0	0	0	0	0	0	0	0	0	0	0	0	0	0	0	0	0	0	0
2.86702	32.8903	30.0838	0				0	0	0	0	0	0	0	0	0	0	0	0	0	0	0	0	0	0	0	0	0	0	0	0	0	0	0	0	0	0	0	0	0	0	0	0	0	0	0	0	0	0	0
2.86904	32.8048	30.1294	0				0	0	0	0	0	0	0	0	0	0	0	0	0	0	0	0	0	0	0	0	0	0	0	0	0	0	0	0	0	0	0	0	0	0	0	0	0	0	0	0	0	0	0
2.87106	32.6379	30.1535	0				0	0	0	0	0	0	0	0	0	0	0	0	0	0	0	0	0	0	0	0	0	0	0	0	0	0	0	0	0	0	0	0	0	0	0	0	0	0	0	0	0	0	0
2.87309	32.5741	30.1635	0				0	0	0	0	0	0	0	0	0	0	0	0	0	0	0	0	0	0	0	0	0	0	0	0	0	0	0	0	0	0	0	0	0	0	0	0	0	0	0	0	0	0	0
2.87511	32.6534	30.093	0				0	0	0	0	0	0	0	0	0	0	0	0	0	0	0	0	0	0	0	0	0	0	0	0	0	0	0	0	0	0	0	0	0	0	0	0	0	0	0	0	0	0	0
2.87713	32.7257	30.1254	0				0	0	0	0	0	0	0	0	0	0	0	0	0	0	0	0	0	0	0	0	0	0	0	0	0	0	0	0	0	0	0	0	0	0	0	0	0	0	0	0	0	0	0
2.87915	32.762	30.1828	0				0	0	0	0	0	0	0	0	0	0	0	0	0	0	0	0	0	0	0	0	0	0	0	0	0	0	0	0	0	0	0	0	0	0	0	0	0	0	0	0	0	0	0
2.88118	32.6295	30.0139	0				0	0	0	0	0	0	0	0	0	0	0	0	0	0	0	0	0	0	0	0	0	0	0	0	0	0	0	0	0	0	0	0	0	0	0	0	0	0	0	0	0	0	0
2.8832	32.7134	30.0263	0				0	0	0	0	0	0	0	0	0	0	0	0	0	0	0	0	0	0	0	0	0	0	0	0	0	0	0	0	0	0	0	0	0	0	0	0	0	0	0	0	0	0	0
2.88522	32.7597	30.3063	0				0	0	0	0	0	0	0	0	0	0	0	0	0	0	0	0	0	0	0	0	0	0	0	0	0	0	0	0	0	0	0	0	0	0	0	0	0	0	0	0	0	0	0
2.88724	32.6968	30.1864	0				0	0	0	0	0	0	0	0	0	0	0	0	0	0	0	0	0	0	0	0	0	0	0	0	0	0	0	0	0	0	0	0	0	0	0	0	0	0	0	0	0	0	0
2.88927	32.5384	29.9256	0				0	0	0	0	0	0	0	0	0	0	0	0	0	0	0	0	0	0	0	0	0	0	0	0	0	0	0	0	0	0	0	0	0	0	0	0	0	0	0	0	0	0	0
2.89129	32.3947	29.9501	0				0	0	0	0	0	0	0	0	0	0	0	0	0	0	0	0	0	0	0	0	0	0	0	0	0	0	0	0	0	0	0	0	0	0	0	0	0	0	0	0	0	0	0
2.89331	32.481	30.1182	0				0	0	0	0	0	0	0	0	0	0	0	0	0	0	0	0	0	0	0	0	0	0	0	0	0	0	0	0	0	0	0	0	0	0	0	0	0	0	0	0	0	0	0
2.89533	32.5521	30.1657	0				0	0	0	0	0	0	0	0	0	0	0	0	0	0	0	0	0	0	0	0	0	0	0	0	0	0	0	0	0	0	0	0	0	0	0	0	0	0	0	0	0	0	0
2.89736	32.8137	30.162	0				0	0	0	0	0	0	0	0	0	0	0	0	0	0	0	0	0	0	0	0	0	0	0	0	0	0	0	0	0	0	0	0	0	0	0	0	0	0	0	0	0	0	0
2.89938	32.8375	30.2513	0				0	0	0	0	0	0	0	0	0	0	0	0	0	0	0	0	0	0	0	0	0	0	0	0	0	0	0	0	0	0	0	0	0	0	0	0	0	0	0	0	0	0	0
2.9014	32.7679	30.2326	0				0	0	0	0	0	0	0	0	0	0	0	0	0	0	0	0	0	0	0	0	0	0	0	0	0	0	0	0	0	0	0	0	0	0	0	0	0	0	0	0	0	0	0
2.90342	32.6534	30.1683	0				0	0	0	0	0	0	0	0	0	0	0	0	0	0	0	0	0	0	0	0	0	0	0	0	0	0	0	0	0	0	0	0	0	0	0	0	0	0	0	0	0	0	0
2.90545	32.5503	30.1032	0				0	0	0	0	0	0	0	0	0	0	0	0	0	0	0	0	0	0	0	0	0	0	0	0	0	0	0	0	0	0	0	0	0	0	0	0	0	0	0	0	0	0	0
2.90747	32.6146	29.9908	0				0	0	0	0	0	0	0	0	0	0	0	0	0	0	0	0	0	0	0	0	0	0	0	0	0	0	0	0	0	0	0	0	0	0	0	0	0	0	0	0	0	0	0
2.90949	32.7087	30.0953	0				0	0	0	0	0	0	0	0	0	0	0	0	0	0	0	0	0	0	0	0	0	0	0	0	0	0	0	0	0	0	0	0	0	0	0	0	0	0	0	0	0	0	0
2.91152	32.8353	30.1225	0				0	0	0	0	0	0	0	0	0	0	0	0	0	0	0	0	0	0	0	0	0	0	0	0	0	0	0	0	0	0	0	0	0	0	0	0	0	0	0	0	0	0	0
2.91354	32.856	30.0919	0				0	0	0	0	0	0	0	0	0	0	0	0	0	0	0	0	0	0	0	0	0	0	0	0	0	0	0	0	0	0	0	0	0	0	0	0	0	0	0	0	0	0	0
2.91556	32.7852	30.129	0				0	0	0	0	0	0	0	0	0	0	0	0	0	0	0	0	0	0	0	0	0	0	0	0	0	0	0	0	0	0	0	0	0	0	0	0	0	0	0	0	0	0	0
2.91758	32.7269	30.0058	0				0	0	0	0	0	0	0	0	0	0	0	0	0	0	0	0	0	0	0	0	0	0	0	0	0	0	0	0	0	0	0	0	0	0	0	0	0	0	0	0	0	0	0
2.91961	32.6896	29.9906	0				0	0	0	0	0	0	0	0	0	0	0	0	0	0	0	0	0	0	0	0	0	0	0	0	0	0	0	0	0	0	0	0	0	0	0	0	0	0	0	0	0	0	0
2.92163	32.5426	29.8827	0				0	0	0	0	0	0	0	0	0	0	0	0	0	0	0	0	0	0	0	0	0	0	0	0	0	0	0	0	0	0	0	0	0	0	0	0	0	0	0	0	0	0	0
2.92365	32.607	29.9525	0				0	0	0	0	0	0	0	0	0	0	0	0	0	0	0	0	0	0	0	0	0	0	0	0	0	0	0	0	0	0	0	0	0	0	0	0	0	0	0	0	0	0	0
2.92567	32.5573	29.9819	0				0	0	0	0	0	0	0	0	0	0	0	0	0	0	0	0	0	0	0	0	0	0	0	0	0	0	0	0	0	0	0	0	0	0	0	0	0	0	0	0	0	0	0
2.9277	32.6216	29.9504	0				0	0	0	0	0	0	0	0	0	0	0	0	0	0	0	0	0	0	0	0	0	0	0	0	0	0	0	0	0	0	0	0	0	0	0	0	0	0	0	0	0	0	0
2.92972	32.7238	30.0806	0				0	0	0	0	0	0	0	0	0	0	0	0	0	0	0	0	0	0	0	0	0	0	0	0	0	0	0	0	0	0	0	0	0	0	0	0	0	0	0	0	0	0	0
2.93174	32.6081	30.0593	0				0	0	0	0	0	0	0	0	0	0	0	0	0	0	0	0	0	0	0	0	0	0	0	0	0	0	0	0	0	0	0	0	0	0	0	0	0	0	0	0	0	0	0
2.93376	32.6894	30.1016	0				0	0	0	0	0	0	0	0	0	0	0	0	0	0	0	0	0	0	0	0	0	0	0	0	0	0	0	0	0	0	0	0	0	0	0	0	0	0	0	0	0	0	0
2.93579	32.7934	30.2419	0				0	0	0	0	0	0	0	0	0	0	0	0	0	0	0	0	0	0	0	0	0	0	0	0	0	0	0	0	0	0	0	0	0	0	0	0	0	0	0	0	0	0	0
2.93781	32.7242	30.1727	0				0	0	0	0	0	0	0	0	0	0	0	0	0	0	0	0	0	0	0	0	0	0	0	0	0	0	0	0	0	0	0	0	0	0	0	0	0	0	0	0	0	0	0
2.93983	32.6104	30.084	0				0	0	0	0	0	0	0	0	0	0	0	0	0	0	0	0	0	0	0	0	0	0	0	0	0	0	0	0	0	0	0	0	0	0	0	0	0	0	0	0	0	0	0
2.94185	32.3807	29.7982	0				0	0	0	0	0	0	0	0	0	0	0	0	0	0	0	0	0	0	0	0	0	0	0	0	0	0	0	0	0	0	0	0	0	0	0	0	0	0	0	0	0	0	0
2.94388	32.5718	29.7706	0				0	0	0	0	0	0	0	0	0	0	0	0	0	0	0	0	0	0	0	0	0	0	0	0	0	0	0	0	0	0	0	0	0	0	0	0	0	0	0	0	0	0	0
2.9459	32.6996	29.9325	0				0	0	0	0	0	0	0	0	0	0	0	0	0	0	0	0	0	0	0	0	0	0	0	0	0	0	0	0	0	0	0	0	0	0	0	0	0	0	0	0	0	0	0
2.94792	32.6688	30.0212	0				0	0	0	0	0	0	0	0	0	0	0	0	0	0	0	0	0	0	0	0	0	0	0	0	0	0	0	0	0	0	0	0	0	0	0	0	0	0	0	0	0	0	0
2.94994	32.6917	30.1138	0				0	0	0	0	0	0	0	0	0	0	0	0	0	0	0	0	0	0	0	0	0	0	0	0	0	0	0	0	0	0	0	0	0	0	0	0	0	0	0	0	0	0	0
2.95197	32.6988	30.0764	0				0	0	0	0	0	0	0	0	0	0	0	0	0	0	0	0	0	0	0	0	0	0	0	0	0	0	0	0	0	0	0	0	0	0	0	0	0	0	0	0	0	0	0
2.95399	32.7002	30.0624	0				0	0	0	0	0	0	0	0	0	0	0	0	0	0	0	0	0	0	0	0	0	0	0	0	0	0	0	0	0	0	0	0	0	0	0	0	0	0	0	0	0	0	0
2.95601	32.6529	30.1446	0				0	0	0	0	0	0	0	0	0	0	0	0	0	0	0	0	0	0	0	0	0	0	0	0	0	0	0	0	0	0	0	0	0	0	0	0	0	0	0	0	0	0	0
2.95803	32.5911	30.1565	0				0	0	0	0	0	0	0	0	0	0	0	0	0	0	0	0	0	0	0	0	0	0	0	0	0	0	0	0	0	0	0	0	0	0	0	0	0	0	0	0	0	0	0
2.96006	32.6932	30.2317	0				0	0	0	0	0	0	0	0	0	0	0	0	0	0	0	0	0	0	0	0	0	0	0	0	0	0	0	0	0	0	0	0	0	0	0	0	0	0	0	0	0	0	0
2.96208	32.678	30.2137	0				0	0	0	0	0	0	0	0	0	0	0	0	0	0	0	0	0	0	0	0	0	0	0	0	0	0	0	0	0	0	0	0	0	0	0	0	0	0	0	0	0	0	0
2.9641	32.7489	30.1481	0				0	0	0	0	0	0	0	0	0	0	0	0	0	0	0	0	0	0	0	0	0	0	0	0	0	0	0	0	0	0	0	0	0	0	0	0	0	0	0	0	0	0	0
2.96613	32.9076	30.1937	0				0	0	0	0	0	0	0	0	0	0	0	0	0	0	0	0	0	0	0	0	0	0	0	0	0	0	0	0	0	0	0	0	0	0	0	0	0	0	0	0	0	0	0
2.96815	32.788	30.0657	0				0	0	0	0	0	0	0	0	0	0	0	0	0	0	0	0	0	0	0	0	0	0	0	0	0	0	0	0	0	0	0	0	0	0	0	0	0	0	0	0	0	0	0
2.97017	32.6929	29.944	0				0	0	0	0	0	0	0	0	0	0	0	0	0	0	0	0	0	0	0	0	0	0	0	0	0	0	0	0	0	0	0	0	0	0	0	0	0	0	0	0	0	0	0
2.97219	32.7577	29.9692	0				0	0	0	0	0	0	0	0	0	0	0	0	0	0	0	0	0	0	0	0	0	0	0	0	0	0	0	0	0	0	0	0	0	0	0	0	0	0	0	0	0	0	0
2.97422	32.7696	30.0663	0				0	0	0	0	0	0	0	0	0	0	0	0	0	0	0	0	0	0	0	0	0	0	0	0	0	0	0	0	0	0	0	0	0	0	0	0	0	0	0	0	0	0	0
2.97624	32.6929	30.0644	0				0	0	0	0	0	0	0	0	0	0	0	0	0	0	0	0	0	0	0	0	0	0	0	0	0	0	0	0	0	0	0	0	0	0	0	0	0	0	0	0	0	0	0
2.97826	32.5944	30.0653	0				0	0	0	0	0	0	0	0	0	0	0	0	0	0	0	0	0	0	0	0	0	0	0	0	0	0	0	0	0	0	0	0	0	0	0	0	0	0	0	0	0	0	0
2.98028	32.6873	29.9997	0				0	0	0	0	0	0	0	0	0	0	0	0	0	0	0	0	0	0	0	0	0	0	0	0	0	0	0	0	0	0	0	0	0	0	0	0	0	0	0	0	0	0	0
2.98231	32.6734	29.9453	0				0	0	0	0	0	0	0	0	0	0	0	0	0	0	0	0	0	0	0	0	0	0	0	0	0	0	0	0	0	0	0	0	0	0	0	0	0	0	0	0	0	0	0
2.98433	32.575	29.9964	0				0	0	0	0	0	0	0	0	0	0	0	0	0	0	0	0	0	0	0	0	0	0	0	0	0	0	0	0	0	0	0	0	0	0	0	0	0	0	0	0	0	0	0
2.98635	32.5049	29.8755	0				0	0	0	0	0	0	0	0	0	0	0	0	0	0	0	0	0	0	0	0	0	0	0	0	0	0	0	0	0	0	0	0	0	0	0	0	0	0	0	0	0	0	0
2.98837	32.563	29.8367	0				0	0	0	0	0	0	0	0	0	0	0	0	0	0	0	0	0	0	0	0	0	0	0	0	0	0	0	0	0	0	0	0	0	0	0	0	0	0	0	0	0	0	0
2.9904	32.6875	29.9512	0				0	0	0	0	0	0	0	0	0	0	0	0	0	0	0	0	0	0	0	0	0	0	0	0	0	0	0	0	0	0	0	0	0	0	0	0	0	0	0	0	0	0	0
2.99242	32.7217	30.1762	0				0	0	0	0	0	0	0	0	0	0	0	0	0	0	0	0	0	0	0	0	0	0	0	0	0	0	0	0	0	0	0	0	0	0	0	0	0	0	0	0	0	0	0
2.99444	32.6923	30.05	0				0	0	0	0	0	0	0	0	0	0	0	0	0	0	0	0	0	0	0	0	0	0	0	0	0	0	0	0	0	0	0	0	0	0	0	0	0	0	0	0	0	0	0
2.99646	32.6969	29.9219	0				0	0	0	0	0	0	0	0	0	0	0	0	0	0	0	0	0	0	0	0	0	0	0	0	0	0	0	0	0	0	0	0	0	0	0	0	0	0	0	0	0	0	0
2.99849	32.7062	30.0385	0				0	0	0	0	0	0	0	0	0	0	0	0	0	0	0	0	0	0	0	0	0	0	0	0	0	0	0	0	0	0	0	0	0	0	0	0	0	0	0	0	0	0	0
3.00051	32.821	30.0042	0				0	0	0	0	0	0	0	0	0	0	0	0	0	0	0	0	0	0	0	0	0	0	0	0	0	0	0	0	0	0	0	0	0	0	0	0	0	0	0	0	0	0	0
3.00253	32.7006	30.1032	0				0	0	0	0	0	0	0	0	0	0	0	0	0	0	0	0	0	0	0	0	0	0	0	0	0	0	0	0	0	0	0	0	0	0	0	0	0	0	0	0	0	0	0
3.00455	32.5455	30.1476	0				0	0	0	0	0	0	0	0	0	0	0	0	0	0	0	0	0	0	0	0	0	0	0	0	0	0	0	0	0	0	0	0	0	0	0	0	0	0	0	0	0	0	0
3.00658	32.4851	30.0242	0				0	0	0	0	0	0	0	0	0	0	0	0	0	0	0	0	0	0	0	0	0	0	0	0	0	0	0	0	0	0	0	0	0	0	0	0	0	0	0	0	0	0	0
3.0086	32.5237	29.8386	0				0	0	0	0	0	0	0	0	0	0	0	0	0	0	0	0	0	0	0	0	0	0	0	0	0	0	0	0	0	0	0	0	0	0	0	0	0	0	0	0	0	0	0
3.01062	32.4325	29.7277	0				0	0	0	0	0	0	0	0	0	0	0	0	0	0	0	0	0	0	0	0	0	0	0	0	0	0	0	0	0	0	0	0	0	0	0	0	0	0	0	0	0	0	0
3.01264	32.3764	29.7851	0				0	0	0	0	0	0	0	0	0	0	0	0	0	0	0	0	0	0	0	0	0	0	0	0	0	0	0	0	0	0	0	0	0	0	0	0	0	0	0	0	0	0	0
3.01467	32.4008	29.8083	0				0	0	0	0	0	0	0	0	0	0	0	0	0	0	0	0	0	0	0	0	0	0	0	0	0	0	0	0	0	0	0	0	0	0	0	0	0	0	0	0	0	0	0
3.01669	32.3663	29.8527	0				0	0	0	0	0	0	0	0	0	0	0	0	0	0	0	0	0	0	0	0	0	0	0	0	0	0	0	0	0	0	0	0	0	0	0	0	0	0	0	0	0	0	0
3.01871	32.3882	29.8191	0				0	0	0	0	0	0	0	0	0	0	0	0	0	0	0	0	0	0	0	0	0	0	0	0	0	0	0	0	0	0	0	0	0	0	0	0	0	0	0	0	0	0	0
3.02074	32.3748	29.6929	0				0	0	0	0	0	0	0	0	0	0	0	0	0	0	0	0	0	0	0	0	0	0	0	0	0	0	0	0	0	0	0	0	0	0	0	0	0	0	0	0	0	0	0
3.02276	32.4106	29.6522	0				0	0	0	0	0	0	0	0	0	0	0	0	0	0	0	0	0	0	0	0	0	0	0	0	0	0	0	0	0	0	0	0	0	0	0	0	0	0	0	0	0	0	0
3.02478	32.5401	29.6272	0				0	0	0	0	0	0	0	0	0	0	0	0	0	0	0	0	0	0	0	0	0	0	0	0	0	0	0	0	0	0	0	0	0	0	0	0	0	0	0	0	0	0	0
3.0268	32.5144	29.6074	0				0	0	0	0	0	0	0	0	0	0	0	0	0	0	0	0	0	0	0	0	0	0	0	0	0	0	0	0	0	0	0	0	0	0	0	0	0	0	0	0	0	0	0
3.02883	32.604	29.7791	0				0	0	0	0	0	0	0	0	0	0	0	0	0	0	0	0	0	0	0	0	0	0	0	0	0	0	0	0	0	0	0	0	0	0	0	0	0	0	0	0	0	0	0
3.03085	32.5651	29.7378	0				0	0	0	0	0	0	0	0	0	0	0	0	0	0	0	0	0	0	0	0	0	0	0	0	0	0	0	0	0	0	0	0	0	0	0	0	0	0	0	0	0	0	0
3.03287	32.4292	29.6894	0				0	0	0	0	0	0	0	0	0	0	0	0	0	0	0	0	0	0	0	0	0	0	0	0	0	0	0	0	0	0	0	0	0	0	0	0	0	0	0	0	0	0	0
3.03489	32.2753	29.7139	0				0	0	0	0	0	0	0	0	0	0	0	0	0	0	0	0	0	0	0	0	0	0	0	0	0	0	0	0	0	0	0	0	0	0	0	0	0	0	0	0	0	0	0
3.03692	32.3815	29.7342	0				0	0	0	0	0	0	0	0	0	0	0	0	0	0	0	0	0	0	0	0	0	0	0	0	0	0	0	0	0	0	0	0	0	0	0	0	0	0	0	0	0	0	0
3.03894	32.5916	29.8433	0				0	0	0	0	0	0	0	0	0	0	0	0	0	0	0	0	0	0	0	0	0	0	0	0	0	0	0	0	0	0	0	0	0	0	0	0	0	0	0	0	0	0	0
3.04096	32.539	29.9254	0				0	0	0	0	0	0	0	0	0	0	0	0	0	0	0	0	0	0	0	0	0	0	0	0	0	0	0	0	0	0	0	0	0	0	0	0	0	0	0	0	0	0	0
3.04298	32.3919	29.8168	0				0	0	0	0	0	0	0	0	0	0	0	0	0	0	0	0	0	0	0	0	0	0	0	0	0	0	0	0	0	0	0	0	0	0	0	0	0	0	0	0	0	0	0
3.04501	32.3262	29.7477	0				0	0	0	0	0	0	0	0	0	0	0	0	0	0	0	0	0	0	0	0	0	0	0	0	0	0	0	0	0	0	0	0	0	0	0	0	0	0	0	0	0	0	0
3.04703	32.3638	29.8045	0				0	0	0	0	0	0	0	0	0	0	0	0	0	0	0	0	0	0	0	0	0	0	0	0	0	0	0	0	0	0	0	0	0	0	0	0	0	0	0	0	0	0	0
3.04905	32.4212	29.769	0				0	0	0	0	0	0	0	0	0	0	0	0	0	0	0	0	0	0	0	0	0	0	0	0	0	0	0	0	0	0	0	0	0	0	0	0	0	0	0	0	0	0	0
3.05107	32.394	29.6776	0				0	0	0	0	0	0	0	0	0	0	0	0	0	0	0	0	0	0	0	0	0	0	0	0	0	0	0	0	0	0	0	0	0	0	0	0	0	0	0	0	0	0	0
3.0531	32.4189	29.595	0				0	0	0	0	0	0	0	0	0	0	0	0	0	0	0	0	0	0	0	0	0	0	0	0	0	0	0	0	0	0	0	0	0	0	0	0	0	0	0	0	0	0	0
3.05512	32.2255	29.5773	0				0	0	0	0	0	0	0	0	0	0	0	0	0	0	0	0	0	0	0	0	0	0	0	0	0	0	0	0	0	0	0	0	0	0	0	0	0	0	0	0	0	0	0
3.05714	32.2386	29.5666	0				0	0	0	0	0	0	0	0	0	0	0	0	0	0	0	0	0	0	0	0	0	0	0	0	0	0	0	0	0	0	0	0	0	0	0	0	0	0	0	0	0	0	0
3.05916	32.324	29.6212	0				0	0	0	0	0	0	0	0	0	0	0	0	0	0	0	0	0	0	0	0	0	0	0	0	0	0	0	0	0	0	0	0	0	0	0	0	0	0	0	0	0	0	0
3.06119	32.3928	29.6279	0				0	0	0	0	0	0	0	0	0	0	0	0	0	0	0	0	0	0	0	0	0	0	0	0	0	0	0	0	0	0	0	0	0	0	0	0	0	0	0	0	0	0	0
3.06321	32.4886	29.6423	0				0	0	0	0	0	0	0	0	0	0	0	0	0	0	0	0	0	0	0	0	0	0	0	0	0	0	0	0	0	0	0	0	0	0	0	0	0	0	0	0	0	0	0
3.06523	32.3111	29.3995	0				0	0	0	0	0	0	0	0	0	0	0	0	0	0	0	0	0	0	0	0	0	0	0	0	0	0	0	0	0	0	0	0	0	0	0	0	0	0	0	0	0	0	0
3.06725	32.2537	29.3564	0				0	0	0	0	0	0	0	0	0	0	0	0	0	0	0	0	0	0	0	0	0	0	0	0	0	0	0	0	0	0	0	0	0	0	0	0	0	0	0	0	0	0	0
3.06928	32.3009	29.4638	0				0	0	0	0	0	0	0	0	0	0	0	0	0	0	0	0	0	0	0	0	0	0	0	0	0	0	0	0	0	0	0	0	0	0	0	0	0	0	0	0	0	0	0
3.0713	32.2324	29.6017	0				0	0	0	0	0	0	0	0	0	0	0	0	0	0	0	0	0	0	0	0	0	0	0	0	0	0	0	0	0	0	0	0	0	0	0	0	0	0	0	0	0	0	0
3.07332	32.3079	29.6637	0				0	0	0	0	0	0	0	0	0	0	0	0	0	0	0	0	0	0	0	0	0	0	0	0	0	0	0	0	0	0	0	0	0	0	0	0	0	0	0	0	0	0	0
3.07535	32.2676	29.4456	0				0	0	0	0	0	0	0	0	0	0	0	0	0	0	0	0	0	0	0	0	0	0	0	0	0	0	0	0	0	0	0	0	0	0	0	0	0	0	0	0	0	0	0
3.07737	32.1713	29.5373	0				0	0	0	0	0	0	0	0	0	0	0	0	0	0	0	0	0	0	0	0	0	0	0	0	0	0	0	0	0	0	0	0	0	0	0	0	0	0	0	0	0	0	0
3.07939	32.049	29.5861	0				0	0	0	0	0	0	0	0	0	0	0	0	0	0	0	0	0	0	0	0	0	0	0	0	0	0	0	0	0	0	0	0	0	0	0	0	0	0	0	0	0	0	0
3.08141	32.11	29.5264	0				0	0	0	0	0	0	0	0	0	0	0	0	0	0	0	0	0	0	0	0	0	0	0	0	0	0	0	0	0	0	0	0	0	0	0	0	0	0	0	0	0	0	0
3.08344	32.0425	29.3795	0				0	0	0	0	0	0	0	0	0	0	0	0	0	0	0	0	0	0	0	0	0	0	0	0	0	0	0	0	0	0	0	0	0	0	0	0	0	0	0	0	0	0	0
3.08546	31.943	29.4309	0				0	0	0	0	0	0	0	0	0	0	0	0	0	0	0	0	0	0	0	0	0	0	0	0	0	0	0	0	0	0	0	0	0	0	0	0	0	0	0	0	0	0	0
3.08748	31.9203	29.5407	0				0	0	0	0	0	0	0	0	0	0	0	0	0	0	0	0	0	0	0	0	0	0	0	0	0	0	0	0	0	0	0	0	0	0	0	0	0	0	0	0	0	0	0
3.0895	31.9775	29.3393	0				0	0	0	0	0	0	0	0	0	0	0	0	0	0	0	0	0	0	0	0	0	0	0	0	0	0	0	0	0	0	0	0	0	0	0	0	0	0	0	0	0	0	0
3.09153	31.8775	29.2996	0				0	0	0	0	0	0	0	0	0	0	0	0	0	0	0	0	0	0	0	0	0	0	0	0	0	0	0	0	0	0	0	0	0	0	0	0	0	0	0	0	0	0	0
3.09355	31.7826	29.2062	0				0	0	0	0	0	0	0	0	0	0	0	0	0	0	0	0	0	0	0	0	0	0	0	0	0	0	0	0	0	0	0	0	0	0	0	0	0	0	0	0	0	0	0
3.09557	31.8956	29.1615	0				0	0	0	0	0	0	0	0	0	0	0	0	0	0	0	0	0	0	0	0	0	0	0	0	0	0	0	0	0	0	0	0	0	0	0	0	0	0	0	0	0	0	0
3.09759	31.799	29.1403	0				0	0	0	0	0	0	0	0	0	0	0	0	0	0	0	0	0	0	0	0	0	0	0	0	0	0	0	0	0	0	0	0	0	0	0	0	0	0	0	0	0	0	0
3.09962	31.5787	28.983	0				0	0	0	0	0	0	0	0	0	0	0	0	0	0	0	0	0	0	0	0	0	0	0	0	0	0	0	0	0	0	0	0	0	0	0	0	0	0	0	0	0	0	0
3.10164	31.576	28.9105	0				0	0	0	0	0	0	0	0	0	0	0	0	0	0	0	0	0	0	0	0	0	0	0	0	0	0	0	0	0	0	0	0	0	0	0	0	0	0	0	0	0	0	0
3.10366	31.603	29.0012	0				0	0	0	0	0	0	0	0	0	0	0	0	0	0	0	0	0	0	0	0	0	0	0	0	0	0	0	0	0	0	0	0	0	0	0	0	0	0	0	0	0	0	0
3.10568	31.6113	28.9319	0				0	0	0	0	0	0	0	0	0	0	0	0	0	0	0	0	0	0	0	0	0	0	0	0	0	0	0	0	0	0	0	0	0	0	0	0	0	0	0	0	0	0	0
3.10771	31.5155	28.8126	0				0	0	0	0	0	0	0	0	0	0	0	0	0	0	0	0	0	0	0	0	0	0	0	0	0	0	0	0	0	0	0	0	0	0	0	0	0	0	0	0	0	0	0
3.10973	31.3856	28.7706	0				0	0	0	0	0	0	0	0	0	0	0	0	0	0	0	0	0	0	0	0	0	0	0	0	0	0	0	0	0	0	0	0	0	0	0	0	0	0	0	0	0	0	0
3.11175	31.2679	28.8419	0				0	0	0	0	0	0	0	0	0	0	0	0	0	0	0	0	0	0	0	0	0	0	0	0	0	0	0	0	0	0	0	0	0	0	0	0	0	0	0	0	0	0	0
3.11377	31.409	28.7479	0				0	0	0	0	0	0	0	0	0	0	0	0	0	0	0	0	0	0	0	0	0	0	0	0	0	0	0	0	0	0	0	0	0	0	0	0	0	0	0	0	0	0	0
3.1158	31.5041	28.7128	0				0	0	0	0	0	0	0	0	0	0	0	0	0	0	0	0	0	0	0	0	0	0	0	0	0	0	0	0	0	0	0	0	0	0	0	0	0	0	0	0	0	0	0
3.11782	31.3736	28.6844	0				0	0	0	0	0	0	0	0	0	0	0	0	0	0	0	0	0	0	0	0	0	0	0	0	0	0	0	0	0	0	0	0	0	0	0	0	0	0	0	0	0	0	0
3.11984	31.1544	28.6501	0				0	0	0	0	0	0	0	0	0	0	0	0	0	0	0	0	0	0	0	0	0	0	0	0	0	0	0	0	0	0	0	0	0	0	0	0	0	0	0	0	0	0	0
3.12186	31.1026	28.4909	0				0	0	0	0	0	0	0	0	0	0	0	0	0	0	0	0	0	0	0	0	0	0	0	0	0	0	0	0	0	0	0	0	0	0	0	0	0	0	0	0	0	0	0
3.12389	30.9984	28.304	0				0	0	0	0	0	0	0	0	0	0	0	0	0	0	0	0	0	0	0	0	0	0	0	0	0	0	0	0	0	0	0	0	0	0	0	0	0	0	0	0	0	0	0
3.12591	30.7805	28.2635	0				0	0	0	0	0	0	0	0	0	0	0	0	0	0	0	0	0	0	0	0	0	0	0	0	0	0	0	0	0	0	0	0	0	0	0	0	0	0	0	0	0	0	0
3.12793	30.5787	28.1258	0				0	0	0	0	0	0	0	0	0	0	0	0	0	0	0	0	0	0	0	0	0	0	0	0	0	0	0	0	0	0	0	0	0	0	0	0	0	0	0	0	0	0	0
3.12995	30.3862	27.8763	0				0	0	0	0	0	0	0	0	0	0	0	0	0	0	0	0	0	0	0	0	0	0	0	0	0	0	0	0	0	0	0	0	0	0	0	0	0	0	0	0	0	0	0
3.13198	30.1552	27.6737	0				0	0	0	0	0	0	0	0	0	0	0	0	0	0	0	0	0	0	0	0	0	0	0	0	0	0	0	0	0	0	0	0	0	0	0	0	0	0	0	0	0	0	0
3.134	29.8687	27.5361	0				0	0	0	0	0	0	0	0	0	0	0	0	0	0	0	0	0	0	0	0	0	0	0	0	0	0	0	0	0	0	0	0	0	0	0	0	0	0	0	0	0	0	0
3.13602	30.152	27.6536	0				0	0	0	0	0	0	0	0	0	0	0	0	0	0	0	0	0	0	0	0	0	0	0	0	0	0	0	0	0	0	0	0	0	0	0	0	0	0	0	0	0	0	0
3.13805	30.7506	28.0913	0				0	0	0	0	0	0	0	0	0	0	0	0	0	0	0	0	0	0	0	0	0	0	0	0	0	0	0	0	0	0	0	0	0	0	0	0	0	0	0	0	0	0	0
3.14007	31.0389	28.3533	0				0	0	0	0	0	0	0	0	0	0	0	0	0	0	0	0	0	0	0	0	0	0	0	0	0	0	0	0	0	0	0	0	0	0	0	0	0	0	0	0	0	0	0
3.14209	31.6043	29.0902	0				0	0	0	0	0	0	0	0	0	0	0	0	0	0	0	0	0	0	0	0	0	0	0	0	0	0	0	0	0	0	0	0	0	0	0	0	0	0	0	0	0	0	0
3.14411	32.0847	29.6198	0				0	0	0	0	0	0	0	0	0	0	0	0	0	0	0	0	0	0	0	0	0	0	0	0	0	0	0	0	0	0	0	0	0	0	0	0	0	0	0	0	0	0	0
3.14614	32.389	29.864	0				0	0	0	0	0	0	0	0	0	0	0	0	0	0	0	0	0	0	0	0	0	0	0	0	0	0	0	0	0	0	0	0	0	0	0	0	0	0	0	0	0	0	0
3.14816	32.6154	30.0403	0				0	0	0	0	0	0	0	0	0	0	0	0	0	0	0	0	0	0	0	0	0	0	0	0	0	0	0	0	0	0	0	0	0	0	0	0	0	0	0	0	0	0	0
3.15018	32.6588	30.0885	0				0	0	0	0	0	0	0	0	0	0	0	0	0	0	0	0	0	0	0	0	0	0	0	0	0	0	0	0	0	0	0	0	0	0	0	0	0	0	0	0	0	0	0
3.1522	32.736	30.0427	0				0	0	0	0	0	0	0	0	0	0	0	0	0	0	0	0	0	0	0	0	0	0	0	0	0	0	0	0	0	0	0	0	0	0	0	0	0	0	0	0	0	0	0
3.15423	32.7426	30.2046	0				0	0	0	0	0	0	0	0	0	0	0	0	0	0	0	0	0	0	0	0	0	0	0	0	0	0	0	0	0	0	0	0	0	0	0	0	0	0	0	0	0	0	0
3.15625	32.8641	30.1903	0				0	0	0	0	0	0	0	0	0	0	0	0	0	0	0	0	0	0	0	0	0	0	0	0	0	0	0	0	0	0	0	0	0	0	0	0	0	0	0	0	0	0	0
3.15827	32.9784	30.1974	0				0	0	0	0	0	0	0	0	0	0	0	0	0	0	0	0	0	0	0	0	0	0	0	0	0	0	0	0	0	0	0	0	0	0	0	0	0	0	0	0	0	0	0
3.16029	32.8711	30.1063	0				0	0	0	0	0	0	0	0	0	0	0	0	0	0	0	0	0	0	0	0	0	0	0	0	0	0	0	0	0	0	0	0	0	0	0	0	0	0	0	0	0	0	0
3.16232	32.91	30.1467	0				0	0	0	0	0	0	0	0	0	0	0	0	0	0	0	0	0	0	0	0	0	0	0	0	0	0	0	0	0	0	0	0	0	0	0	0	0	0	0	0	0	0	0
3.16434	32.9338	30.2723	0				0	0	0	0	0	0	0	0	0	0	0	0	0	0	0	0	0	0	0	0	0	0	0	0	0	0	0	0	0	0	0	0	0	0	0	0	0	0	0	0	0	0	0
3.16636	33.0016	30.3403	0				0	0	0	0	0	0	0	0	0	0	0	0	0	0	0	0	0	0	0	0	0	0	0	0	0	0	0	0	0	0	0	0	0	0	0	0	0	0	0	0	0	0	0
3.16838	32.9629	30.3062	0				0	0	0	0	0	0	0	0	0	0	0	0	0	0	0	0	0	0	0	0	0	0	0	0	0	0	0	0	0	0	0	0	0	0	0	0	0	0	0	0	0	0	0
3.17041	32.7816	30.2223	0				0	0	0	0	0	0	0	0	0	0	0	0	0	0	0	0	0	0	0	0	0	0	0	0	0	0	0	0	0	0	0	0	0	0	0	0	0	0	0	0	0	0	0
3.17243	32.8096	30.1349	0				0	0	0	0	0	0	0	0	0	0	0	0	0	0	0	0	0	0	0	0	0	0	0	0	0	0	0	0	0	0	0	0	0	0	0	0	0	0	0	0	0	0	0
3.17445	32.9017	30.2863	0				0	0	0	0	0	0	0	0	0	0	0	0	0	0	0	0	0	0	0	0	0	0	0	0	0	0	0	0	0	0	0	0	0	0	0	0	0	0	0	0	0	0	0
3.17647	32.8777	30.3637	0				0	0	0	0	0	0	0	0	0	0	0	0	0	0	0	0	0	0	0	0	0	0	0	0	0	0	0	0	0	0	0	0	0	0	0	0	0	0	0	0	0	0	0
3.1785	33.0688	30.2907	0				0	0	0	0	0	0	0	0	0	0	0	0	0	0	0	0	0	0	0	0	0	0	0	0	0	0	0	0	0	0	0	0	0	0	0	0	0	0	0	0	0	0	0
3.18052	33.0822	30.2109	0				0	0	0	0	0	0	0	0	0	0	0	0	0	0	0	0	0	0	0	0	0	0	0	0	0	0	0	0	0	0	0	0	0	0	0	0	0	0	0	0	0	0	0
3.18254	33.0444	30.236	0				0	0	0	0	0	0	0	0	0	0	0	0	0	0	0	0	0	0	0	0	0	0	0	0	0	0	0	0	0	0	0	0	0	0	0	0	0	0	0	0	0	0	0
3.18456	33.001	30.1961	0				0	0	0	0	0	0	0	0	0	0	0	0	0	0	0	0	0	0	0	0	0	0	0	0	0	0	0	0	0	0	0	0	0	0	0	0	0	0	0	0	0	0	0
3.18659	32.8967	30.196	0				0	0	0	0	0	0	0	0	0	0	0	0	0	0	0	0	0	0	0	0	0	0	0	0	0	0	0	0	0	0	0	0	0	0	0	0	0	0	0	0	0	0	0
3.18861	33.0024	30.4621	0				0	0	0	0	0	0	0	0	0	0	0	0	0	0	0	0	0	0	0	0	0	0	0	0	0	0	0	0	0	0	0	0	0	0	0	0	0	0	0	0	0	0	0
3.19063	32.9831	30.552	0				0	0	0	0	0	0	0	0	0	0	0	0	0	0	0	0	0	0	0	0	0	0	0	0	0	0	0	0	0	0	0	0	0	0	0	0	0	0	0	0	0	0	0
3.19266	33.1764	30.2943	0				0	0	0	0	0	0	0	0	0	0	0	0	0	0	0	0	0	0	0	0	0	0	0	0	0	0	0	0	0	0	0	0	0	0	0	0	0	0	0	0	0	0	0
3.19468	33.2432	30.2309	0				0	0	0	0	0	0	0	0	0	0	0	0	0	0	0	0	0	0	0	0	0	0	0	0	0	0	0	0	0	0	0	0	0	0	0	0	0	0	0	0	0	0	0
3.1967	33.015	30.3653	0				0	0	0	0	0	0	0	0	0	0	0	0	0	0	0	0	0	0	0	0	0	0	0	0	0	0	0	0	0	0	0	0	0	0	0	0	0	0	0	0	0	0	0
3.19872	33.033	30.3448	0				0	0	0	0	0	0	0	0	0	0	0	0	0	0	0	0	0	0	0	0	0	0	0	0	0	0	0	0	0	0	0	0	0	0	0	0	0	0	0	0	0	0	0
3.20075	33.1256	30.3643	0				0	0	0	0	0	0	0	0	0	0	0	0	0	0	0	0	0	0	0	0	0	0	0	0	0	0	0	0	0	0	0	0	0	0	0	0	0	0	0	0	0	0	0
3.20277	33.1551	30.3576	0				0	0	0	0	0	0	0	0	0	0	0	0	0	0	0	0	0	0	0	0	0	0	0	0	0	0	0	0	0	0	0	0	0	0	0	0	0	0	0	0	0	0	0
3.20479	33.0459	30.2868	0				0	0	0	0	0	0	0	0	0	0	0	0	0	0	0	0	0	0	0	0	0	0	0	0	0	0	0	0	0	0	0	0	0	0	0	0	0	0	0	0	0	0	0
3.20681	33.0451	30.2093	0				0	0	0	0	0	0	0	0	0	0	0	0	0	0	0	0	0	0	0	0	0	0	0	0	0	0	0	0	0	0	0	0	0	0	0	0	0	0	0	0	0	0	0
3.20884	33.2126	30.4697	0				0	0	0	0	0	0	0	0	0	0	0	0	0	0	0	0	0	0	0	0	0	0	0	0	0	0	0	0	0	0	0	0	0	0	0	0	0	0	0	0	0	0	0
3.21086	33.1212	30.6673	0				0	0	0	0	0	0	0	0	0	0	0	0	0	0	0	0	0	0	0	0	0	0	0	0	0	0	0	0	0	0	0	0	0	0	0	0	0	0	0	0	0	0	0
3.21288	32.9129	30.544	0				0	0	0	0	0	0	0	0	0	0	0	0	0	0	0	0	0	0	0	0	0	0	0	0	0	0	0	0	0	0	0	0	0	0	0	0	0	0	0	0	0	0	0
3.2149	32.9809	30.4036	0				0	0	0	0	0	0	0	0	0	0	0	0	0	0	0	0	0	0	0	0	0	0	0	0	0	0	0	0	0	0	0	0	0	0	0	0	0	0	0	0	0	0	0
3.21693	33.0279	30.4943	0				0	0	0	0	0	0	0	0	0	0	0	0	0	0	0	0	0	0	0	0	0	0	0	0	0	0	0	0	0	0	0	0	0	0	0	0	0	0	0	0	0	0	0
3.21895	33.1487	30.4896	0				0	0	0	0	0	0	0	0	0	0	0	0	0	0	0	0	0	0	0	0	0	0	0	0	0	0	0	0	0	0	0	0	0	0	0	0	0	0	0	0	0	0	0
3.22097	33.0853	30.2691	0				0	0	0	0	0	0	0	0	0	0	0	0	0	0	0	0	0	0	0	0	0	0	0	0	0	0	0	0	0	0	0	0	0	0	0	0	0	0	0	0	0	0	0
3.22299	33.0336	30.2155	0				0	0	0	0	0	0	0	0	0	0	0	0	0	0	0	0	0	0	0	0	0	0	0	0	0	0	0	0	0	0	0	0	0	0	0	0	0	0	0	0	0	0	0
3.22502	33.2488	30.3695	0				0	0	0	0	0	0	0	0	0	0	0	0	0	0	0	0	0	0	0	0	0	0	0	0	0	0	0	0	0	0	0	0	0	0	0	0	0	0	0	0	0	0	0
3.22704	33.3541	30.3865	0				0	0	0	0	0	0	0	0	0	0	0	0	0	0	0	0	0	0	0	0	0	0	0	0	0	0	0	0	0	0	0	0	0	0	0	0	0	0	0	0	0	0	0
3.22906	33.2532	30.4279	0				0	0	0	0	0	0	0	0	0	0	0	0	0	0	0	0	0	0	0	0	0	0	0	0	0	0	0	0	0	0	0	0	0	0	0	0	0	0	0	0	0	0	0
3.23108	33.2403	30.3708	0				0	0	0	0	0	0	0	0	0	0	0	0	0	0	0	0	0	0	0	0	0	0	0	0	0	0	0	0	0	0	0	0	0	0	0	0	0	0	0	0	0	0	0
3.23311	33.2197	30.3691	0				0	0	0	0	0	0	0	0	0	0	0	0	0	0	0	0	0	0	0	0	0	0	0	0	0	0	0	0	0	0	0	0	0	0	0	0	0	0	0	0	0	0	0
3.23513	33.1896	30.381	0				0	0	0	0	0	0	0	0	0	0	0	0	0	0	0	0	0	0	0	0	0	0	0	0	0	0	0	0	0	0	0	0	0	0	0	0	0	0	0	0	0	0	0
3.23715	33.1184	30.2458	0				0	0	0	0	0	0	0	0	0	0	0	0	0	0	0	0	0	0	0	0	0	0	0	0	0	0	0	0	0	0	0	0	0	0	0	0	0	0	0	0	0	0	0
3.23917	32.8615	30.098	0				0	0	0	0	0	0	0	0	0	0	0	0	0	0	0	0	0	0	0	0	0	0	0	0	0	0	0	0	0	0	0	0	0	0	0	0	0	0	0	0	0	0	0
3.2412	32.3795	29.6012	0				0	0	0	0	0	0	0	0	0	0	0	0	0	0	0	0	0	0	0	0	0	0	0	0	0	0	0	0	0	0	0	0	0	0	0	0	0	0	0	0	0	0	0
3.24322	32.1412	29.4032	0				0	0	0	0	0	0	0	0	0	0	0	0	0	0	0	0	0	0	0	0	0	0	0	0	0	0	0	0	0	0	0	0	0	0	0	0	0	0	0	0	0	0	0
3.24524	31.6664	28.8768	0				0	0	0	0	0	0	0	0	0	0	0	0	0	0	0	0	0	0	0	0	0	0	0	0	0	0	0	0	0	0	0	0	0	0	0	0	0	0	0	0	0	0	0
3.24726	31.4003	28.6851	0				0	0	0	0	0	0	0	0	0	0	0	0	0	0	0	0	0	0	0	0	0	0	0	0	0	0	0	0	0	0	0	0	0	0	0	0	0	0	0	0	0	0	0
3.24929	32.516	30.0091	0				0	0	0	0	0	0	0	0	0	0	0	0	0	0	0	0	0	0	0	0	0	0	0	0	0	0	0	0	0	0	0	0	0	0	0	0	0	0	0	0	0	0	0
3.25131	33.2033	30.328	0				0	0	0	0	0	0	0	0	0	0	0	0	0	0	0	0	0	0	0	0	0	0	0	0	0	0	0	0	0	0	0	0	0	0	0	0	0	0	0	0	0	0	0
3.25333	33.5953	30.3787	0				0	0	0	0	0	0	0	0	0	0	0	0	0	0	0	0	0	0	0	0	0	0	0	0	0	0	0	0	0	0	0	0	0	0	0	0	0	0	0	0	0	0	0
3.25536	33.7173	30.4097	0				0	0	0	0	0	0	0	0	0	0	0	0	0	0	0	0	0	0	0	0	0	0	0	0	0	0	0	0	0	0	0	0	0	0	0	0	0	0	0	0	0	0	0
3.25738	33.3861	30.0662	0				0	0	0	0	0	0	0	0	0	0	0	0	0	0	0	0	0	0	0	0	0	0	0	0	0	0	0	0	0	0	0	0	0	0	0	0	0	0	0	0	0	0	0
3.2594	33.273	30.2197	0				0	0	0	0	0	0	0	0	0	0	0	0	0	0	0	0	0	0	0	0	0	0	0	0	0	0	0	0	0	0	0	0	0	0	0	0	0	0	0	0	0	0	0
3.26142	32.9231	29.8589	0				0	0	0	0	0	0	0	0	0	0	0	0	0	0	0	0	0	0	0	0	0	0	0	0	0	0	0	0	0	0	0	0	0	0	0	0	0	0	0	0	0	0	0
3.26345	32.3259	29.4429	0				0	0	0	0	0	0	0	0	0	0	0	0	0	0	0	0	0	0	0	0	0	0	0	0	0	0	0	0	0	0	0	0	0	0	0	0	0	0	0	0	0	0	0
3.26547	30.5509	28.0917	0				0	0	0	0	0	0	0	0	0	0	0	0	0	0	0	0	0	0	0	0	0	0	0	0	0	0	0	0	0	0	0	0	0	0	0	0	0	0	0	0	0	0	0
3.26749	28.8763	26.8697	0				0	0	0	0	0	0	0	0	0	0	0	0	0	0	0	0	0	0	0	0	0	0	0	0	0	0	0	0	0	0	0	0	0	0	0	0	0	0	0	0	0	0	0
3.26951	27.4054	25.0468	0				0	0	0	0	0	0	0	0	0	0	0	0	0	0	0	0	0	0	0	0	0	0	0	0	0	0	0	0	0	0	0	0	0	0	0	0	0	0	0	0	0	0	0
3.27154	25.1252	22.989	0				0	0	0	0	0	0	0	0	0	0	0	0	0	0	0	0	0	0	0	0	0	0	0	0	0	0	0	0	0	0	0	0	0	0	0	0	0	0	0	0	0	0	0
3.27356	23.0852	20.9872	0				0	0	0	0	0	0	0	0	0	0	0	0	0	0	0	0	0	0	0	0	0	0	0	0	0	0	0	0	0	0	0	0	0	0	0	0	0	0	0	0	0	0	0
3.27558	21.094	19.1787	0				0	0	0	0	0	0	0	0	0	0	0	0	0	0	0	0	0	0	0	0	0	0	0	0	0	0	0	0	0	0	0	0	0	0	0	0	0	0	0	0	0	0	0
3.2776	16.8282	15.379	0				0	0	0	0	0	0	0	0	0	0	0	0	0	0	0	0	0	0	0	0	0	0	0	0	0	0	0	0	0	0	0	0	0	0	0	0	0	0	0	0	0	0	0
3.27963	12.5594	11.3567	0				0	0	0	0	0	0	0	0	0	0	0	0	0	0	0	0	0	0	0	0	0	0	0	0	0	0	0	0	0	0	0	0	0	0	0	0	0	0	0	0	0	0	0
3.28165	6.95666	6.43862	0				0	0	0	0	0	0	0	0	0	0	0	0	0	0	0	0	0	0	0	0	0	0	0	0	0	0	0	0	0	0	0	0	0	0	0	0	0	0	0	0	0	0	0
3.28367	0.9707	0.94919	0				0	0	0	0	0	0	0	0	0	0	0	0	0	0	0	0	0	0	0	0	0	0	0	0	0	0	0	0	0	0	0	0	0	0	0	0	0	0	0	0	0	0	0
3.28569	0.00466	0.00466	0				0	0	0	0	0	0	0	0	0	0	0	0	0	0	0	0	0	0	0	0	0	0	0	0	0	0	0	0	0	0	0	0	0	0	0	0	0	0	0	0	0	0	0
3.28772	0	0	0				0	0	0	0	0	0	0	0	0	0	0	0	0	0	0	0	0	0	0	0	0	0	0	0	0	0	0	0	0	0	0	0	0	0	0	0	0	0	0	0	0	0	0
3.28974	0	0	0				0	0	0	0	0	0	0	0	0	0	0	0	0	0	0	0	0	0	0	0	0	0	0	0	0	0	0	0	0	0	0	0	0	0	0	0	0	0	0	0	0	0	0
3.29176	0	0	0				0	0	0	0	0	0	0	0	0	0	0	0	0	0	0	0	0	0	0	0	0	0	0	0	0	0	0	0	0	0	0	0	0	0	0	0	0	0	0	0	0	0	0
3.29378	0	0	0				0	0	0	0	0	0	0	0	0	0	0	0	0	0	0	0	0	0	0	0	0	0	0	0	0	0	0	0	0	0	0	0	0	0	0	0	0	0	0	0	0	0	0
3.29581	0	0	0				0	0	0	0	0	0	0	0	0	0	0	0	0	0	0	0	0	0	0	0	0	0	0	0	0	0	0	0	0	0	0	0	0	0	0	0	0	0	0	0	0	0	0
3.29783	0	0	0				0	0	0	0	0	0	0	0	0	0	0	0	0	0	0	0	0	0	0	0	0	0	0	0	0	0	0	0	0	0	0	0	0	0	0	0	0	0	0	0	0	0	0
3.29985	0	0	0				0	0	0	0	0	0	0	0	0	0	0	0	0	0	0	0	0	0	0	0	0	0	0	0	0	0	0	0	0	0	0	0	0	0	0	0	0	0	0	0	0	0	0
3.30187	0	0	0				0	0	0	0	0	0	0	0	0	0	0	0	0	0	0	0	0	0	0	0	0	0	0	0	0	0	0	0	0	0	0	0	0	0	0	0	0	0	0	0	0	0	0
3.3039	0	0	0				0	0	0	0	0	0	0	0	0	0	0	0	0	0	0	0	0	0	0	0	0	0	0	0	0	0	0	0	0	0	0	0	0	0	0	0	0	0	0	0	0	0	0
3.30592	0	0	0				0	0	0	0	0	0	0	0	0	0	0	0	0	0	0	0	0	0	0	0	0	0	0	0	0	0	0	0	0	0	0	0	0	0	0	0	0	0	0	0	0	0	0
3.30794	0	0	0				0	0	0	0	0	0	0	0	0	0	0	0	0	0	0	0	0	0	0	0	0	0	0	0	0	0	0	0	0	0	0	0	0	0	0	0	0	0	0	0	0	0	0
3.30997	0	0	0				0	0	0	0	0	0	0	0	0	0	0	0	0	0	0	0	0	0	0	0	0	0	0	0	0	0	0	0	0	0	0	0	0	0	0	0	0	0	0	0	0	0	0
3.31199	0	0	0				0	0	0	0	0	0	0	0	0	0	0	0	0	0	0	0	0	0	0	0	0	0	0	0	0	0	0	0	0	0	0	0	0	0	0	0	0	0	0	0	0	0	0
3.31401	0	0	0				0	0	0	0	0	0	0	0	0	0	0	0	0	0	0	0	0	0	0	0	0	0	0	0	0	0	0	0	0	0	0	0	0	0	0	0	0	0	0	0	0	0	0
3.31603	0	0	0				0	0	0	0	0	0	0	0	0	0	0	0	0	0	0	0	0	0	0	0	0	0	0	0	0	0	0	0	0	0	0	0	0	0	0	0	0	0	0	0	0	0	0
3.31806	0	0	0				0	0	0	0	0	0	0	0	0	0	0	0	0	0	0	0	0	0	0	0	0	0	0	0	0	0	0	0	0	0	0	0	0	0	0	0	0	0	0	0	0	0	0
3.32008	0	0	0				0	0	0	0	0	0	0	0	0	0	0	0	0	0	0	0	0	0	0	0	0	0	0	0	0	0	0	0	0	0	0	0	0	0	0	0	0	0	0	0	0	0	0
3.3221	0	0	0				0	0	0	0	0	0	0	0	0	0	0	0	0	0	0	0	0	0	0	0	0	0	0	0	0	0	0	0	0	0	0	0	0	0	0	0	0	0	0	0	0	0	0
3.32412	0	0	0				0	0	0	0	0	0	0	0	0	0	0	0	0	0	0	0	0	0	0	0	0	0	0	0	0	0	0	0	0	0	0	0	0	0	0	0	0	0	0	0	0	0	0
3.32615	0	0	0				0	0	0	0	0	0	0	0	0	0	0	0	0	0	0	0	0	0	0	0	0	0	0	0	0	0	0	0	0	0	0	0	0	0	0	0	0	0	0	0	0	0	0
3.32817	0	0	0				0	0	0	0	0	0	0	0	0	0	0	0	0	0	0	0	0	0	0	0	0	0	0	0	0	0	0	0	0	0	0	0	0	0	0	0	0	0	0	0	0	0	0
3.33019	0	0	0				0	0	0	0	0	0	0	0	0	0	0	0	0	0	0	0	0	0	0	0	0	0	0	0	0	0	0	0	0	0	0	0	0	0	0	0	0	0	0	0	0	0	0
3.33221	0	0	0				0	0	0	0	0	0	0	0	0	0	0	0	0	0	0	0	0	0	0	0	0	0	0	0	0	0	0	0	0	0	0	0	0	0	0	0	0	0	0	0	0	0	0
3.33424	0	0	0				0	0	0	0	0	0	0	0	0	0	0	0	0	0	0	0	0	0	0	0	0	0	0	0	0	0	0	0	0	0	0	0	0	0	0	0	0	0	0	0	0	0	0
3.33626	0	0	0				0	0	0	0	0	0	0	0	0	0	0	0	0	0	0	0	0	0	0	0	0	0	0	0	0	0	0	0	0	0	0	0	0	0	0	0	0	0	0	0	0	0	0
3.33828	0	0	0				0	0	0	0	0	0	0	0	0	0	0	0	0	0	0	0	0	0	0	0	0	0	0	0	0	0	0	0	0	0	0	0	0	0	0	0	0	0	0	0	0	0	0
3.3403	0	0	0				0	0	0	0	0	0	0	0	0	0	0	0	0	0	0	0	0	0	0	0	0	0	0	0	0	0	0	0	0	0	0	0	0	0	0	0	0	0	0	0	0	0	0
3.34233	0	0	0				0	0	0	0	0	0	0	0	0	0	0	0	0	0	0	0	0	0	0	0	0	0	0	0	0	0	0	0	0	0	0	0	0	0	0	0	0	0	0	0	0	0	0
3.34435	0	0	0				0	0	0	0	0	0	0	0	0	0	0	0	0	0	0	0	0	0	0	0	0	0	0	0	0	0	0	0	0	0	0	0	0	0	0	0	0	0	0	0	0	0	0
3.34637	0	0	0				0	0	0	0	0	0	0	0	0	0	0	0	0	0	0	0	0	0	0	0	0	0	0	0	0	0	0	0	0	0	0	0	0	0	0	0	0	0	0	0	0	0	0
3.34839	0	0	0				0	0	0	0	0	0	0	0	0	0	0	0	0	0	0	0	0	0	0	0	0	0	0	0	0	0	0	0	0	0	0	0	0	0	0	0	0	0	0	0	0	0	0
3.35042	0	0	0				0	0	0	0	0	0	0	0	0	0	0	0	0	0	0	0	0	0	0	0	0	0	0	0	0	0	0	0	0	0	0	0	0	0	0	0	0	0	0	0	0	0	0
3.35244	0	0	0				0	0	0	0	0	0	0	0	0	0	0	0	0	0	0	0	0	0	0	0	0	0	0	0	0	0	0	0	0	0	0	0	0	0	0	0	0	0	0	0	0	0	0
3.35446	0	0	0				0	0	0	0	0	0	0	0	0	0	0	0	0	0	0	0	0	0	0	0	0	0	0	0	0	0	0	0	0	0	0	0	0	0	0	0	0	0	0	0	0	0	0
3.35648	0	0	0				0	0	0	0	0	0	0	0	0	0	0	0	0	0	0	0	0	0	0	0	0	0	0	0	0	0	0	0	0	0	0	0	0	0	0	0	0	0	0	0	0	0	0
3.35851	0	0	0				0	0	0	0	0	0	0	0	0	0	0	0	0	0	0	0	0	0	0	0	0	0	0	0	0	0	0	0	0	0	0	0	0	0	0	0	0	0	0	0	0	0	0
3.36053	0	0	0				0	0	0	0	0	0	0	0	0	0	0	0	0	0	0	0	0	0	0	0	0	0	0	0	0	0	0	0	0	0	0	0	0	0	0	0	0	0	0	0	0	0	0
3.36255	0	0	0				0	0	0	0	0	0	0	0	0	0	0	0	0	0	0	0	0	0	0	0	0	0	0	0	0	0	0	0	0	0	0	0	0	0	0	0	0	0	0	0	0	0	0
3.36457	0	0	0				0	0	0	0	0	0	0	0	0	0	0	0	0	0	0	0	0	0	0	0	0	0	0	0	0	0	0	0	0	0	0	0	0	0	0	0	0	0	0	0	0	0	0
3.3666	0	0	0				0	0	0	0	0	0	0	0	0	0	0	0	0	0	0	0	0	0	0	0	0	0	0	0	0	0	0	0	0	0	0	0	0	0	0	0	0	0	0	0	0	0	0
3.36862	0	0	0				0	0	0	0	0	0	0	0	0	0	0	0	0	0	0	0	0	0	0	0	0	0	0	0	0	0	0	0	0	0	0	0	0	0	0	0	0	0	0	0	0	0	0
3.37064	0	0	0				0	0	0	0	0	0	0	0	0	0	0	0	0	0	0	0	0	0	0	0	0	0	0	0	0	0	0	0	0	0	0	0	0	0	0	0	0	0	0	0	0	0	0
3.37267	0	0	0				0	0	0	0	0	0	0	0	0	0	0	0	0	0	0	0	0	0	0	0	0	0	0	0	0	0	0	0	0	0	0	0	0	0	0	0	0	0	0	0	0	0	0
3.37469	0	0	0				0	0	0	0	0	0	0	0	0	0	0	0	0	0	0	0	0	0	0	0	0	0	0	0	0	0	0	0	0	0	0	0	0	0	0	0	0	0	0	0	0	0	0
3.37671	0	0	0				0	0	0	0	0	0	0	0	0	0	0	0	0	0	0	0	0	0	0	0	0	0	0	0	0	0	0	0	0	0	0	0	0	0	0	0	0	0	0	0	0	0	0
3.37873	0	0	0				0	0	0	0	0	0	0	0	0	0	0	0	0	0	0	0	0	0	0	0	0	0	0	0	0	0	0	0	0	0	0	0	0	0	0	0	0	0	0	0	0	0	0
3.38076	0	0	0				0	0	0	0	0	0	0	0	0	0	0	0	0	0	0	0	0	0	0	0	0	0	0	0	0	0	0	0	0	0	0	0	0	0	0	0	0	0	0	0	0	0	0
3.38278	0	0	0				0	0	0	0	0	0	0	0	0	0	0	0	0	0	0	0	0	0	0	0	0	0	0	0	0	0	0	0	0	0	0	0	0	0	0	0	0	0	0	0	0	0	0
3.3848	0	0	0				0	0	0	0	0	0	0	0	0	0	0	0	0	0	0	0	0	0	0	0	0	0	0	0	0	0	0	0	0	0	0	0	0	0	0	0	0	0	0	0	0	0	0
3.38682	0	0	0				0	0	0	0	0	0	0	0	0	0	0	0	0	0	0	0	0	0	0	0	0	0	0	0	0	0	0	0	0	0	0	0	0	0	0	0	0	0	0	0	0	0	0
3.38885	0	0	0				0	0	0	0	0	0	0	0	0	0	0	0	0	0	0	0	0	0	0	0	0	0	0	0	0	0	0	0	0	0	0	0	0	0	0	0	0	0	0	0	0	0	0
3.39087	0	0	0				0	0	0	0	0	0	0	0	0	0	0	0	0	0	0	0	0	0	0	0	0	0	0	0	0	0	0	0	0	0	0	0	0	0	0	0	0	0	0	0	0	0	0
3.39289	0	0	0				0	0	0	0	0	0	0	0	0	0	0	0	0	0	0	0	0	0	0	0	0	0	0	0	0	0	0	0	0	0	0	0	0	0	0	0	0	0	0	0	0	0	0
3.39491	0	0	0				0	0	0	0	0	0	0	0	0	0	0	0	0	0	0	0	0	0	0	0	0	0	0	0	0	0	0	0	0	0	0	0	0	0	0	0	0	0	0	0	0	0	0
3.39694	0	0	0				0	0	0	0	0	0	0	0	0	0	0	0	0	0	0	0	0	0	0	0	0	0	0	0	0	0	0	0	0	0	0	0	0	0	0	0	0	0	0	0	0	0	0
3.39896	0	0	0				0	0	0	0	0	0	0	0	0	0	0	0	0	0	0	0	0	0	0	0	0	0	0	0	0	0	0	0	0	0	0	0	0	0	0	0	0	0	0	0	0	0	0
3.40098	0	0	0				0	0	0	0	0	0	0	0	0	0	0	0	0	0	0	0	0	0	0	0	0	0	0	0	0	0	0	0	0	0	0	0	0	0	0	0	0	0	0	0	0	0	0
3.403	0	0	0				0	0	0	0	0	0	0	0	0	0	0	0	0	0	0	0	0	0	0	0	0	0	0	0	0	0	0	0	0	0	0	0	0	0	0	0	0	0	0	0	0	0	0
3.40503	0	0	0				0	0	0	0	0	0	0	0	0	0	0	0	0	0	0	0	0	0	0	0	0	0	0	0	0	0	0	0	0	0	0	0	0	0	0	0	0	0	0	0	0	0	0
3.40705	0	0	0				0	0	0	0	0	0	0	0	0	0	0	0	0	0	0	0	0	0	0	0	0	0	0	0	0	0	0	0	0	0	0	0	0	0	0	0	0	0	0	0	0	0	0
3.40907	0	0	0				0	0	0	0	0	0	0	0	0	0	0	0	0	0	0	0	0	0	0	0	0	0	0	0	0	0	0	0	0	0	0	0	0	0	0	0	0	0	0	0	0	0	0
3.41109	0	0	0				0	0	0	0	0	0	0	0	0	0	0	0	0	0	0	0	0	0	0	0	0	0	0	0	0	0	0	0	0	0	0	0	0	0	0	0	0	0	0	0	0	0	0
3.41312	0	0	0				0	0	0	0	0	0	0	0	0	0	0	0	0	0	0	0	0	0	0	0	0	0	0	0	0	0	0	0	0	0	0	0	0	0	0	0	0	0	0	0	0	0	0
3.41514	0	0	0				0	0	0	0	0	0	0	0	0	0	0	0	0	0	0	0	0	0	0	0	0	0	0	0	0	0	0	0	0	0	0	0	0	0	0	0	0	0	0	0	0	0	0
3.41716	0	0	0				0	0	0	0	0	0	0	0	0	0	0	0	0	0	0	0	0	0	0	0	0	0	0	0	0	0	0	0	0	0	0	0	0	0	0	0	0	0	0	0	0	0	0
3.41918	0	0	0				0	0	0	0	0	0	0	0	0	0	0	0	0	0	0	0	0	0	0	0	0	0	0	0	0	0	0	0	0	0	0	0	0	0	0	0	0	0	0	0	0	0	0
3.42121	0	0	0				0	0	0	0	0	0	0	0	0	0	0	0	0	0	0	0	0	0	0	0	0	0	0	0	0	0	0	0	0	0	0	0	0	0	0	0	0	0	0	0	0	0	0
3.42323	0	0	0				0	0	0	0	0	0	0	0	0	0	0	0	0	0	0	0	0	0	0	0	0	0	0	0	0	0	0	0	0	0	0	0	0	0	0	0	0	0	0	0	0	0	0
3.42525	0	0	0				0	0	0	0	0	0	0	0	0	0	0	0	0	0	0	0	0	0	0	0	0	0	0	0	0	0	0	0	0	0	0	0	0	0	0	0	0	0	0	0	0	0	0
3.42728	0	0	0				0	0	0	0	0	0	0	0	0	0	0	0	0	0	0	0	0	0	0	0	0	0	0	0	0	0	0	0	0	0	0	0	0	0	0	0	0	0	0	0	0	0	0
3.4293	0	0	0				0	0	0	0	0	0	0	0	0	0	0	0	0	0	0	0	0	0	0	0	0	0	0	0	0	0	0	0	0	0	0	0	0	0	0	0	0	0	0	0	0	0	0
3.43132	0	0	0				0	0	0	0	0	0	0	0	0	0	0	0	0	0	0	0	0	0	0	0	0	0	0	0	0	0	0	0	0	0	0	0	0	0	0	0	0	0	0	0	0	0	0
3.43334	0	0	0				0	0	0	0	0	0	0	0	0	0	0	0	0	0	0	0	0	0	0	0	0	0	0	0	0	0	0	0	0	0	0	0	0	0	0	0	0	0	0	0	0	0	0
3.43537	0	0	0				0	0	0	0	0	0	0	0	0	0	0	0	0	0	0	0	0	0	0	0	0	0	0	0	0	0	0	0	0	0	0	0	0	0	0	0	0	0	0	0	0	0	0
3.43739	0	0	0				0	0	0	0	0	0	0	0	0	0	0	0	0	0	0	0	0	0	0	0	0	0	0	0	0	0	0	0	0	0	0	0	0	0	0	0	0	0	0	0	0	0	0
3.43941	0	0	0				0	0	0	0	0	0	0	0	0	0	0	0	0	0	0	0	0	0	0	0	0	0	0	0	0	0	0	0	0	0	0	0	0	0	0	0	0	0	0	0	0	0	0
3.44143	0	0	0				0	0	0	0	0	0	0	0	0	0	0	0	0	0	0	0	0	0	0	0	0	0	0	0	0	0	0	0	0	0	0	0	0	0	0	0	0	0	0	0	0	0	0
3.44346	0	0	0				0	0	0	0	0	0	0	0	0	0	0	0	0	0	0	0	0	0	0	0	0	0	0	0	0	0	0	0	0	0	0	0	0	0	0	0	0	0	0	0	0	0	0
3.44548	0	0	0				0	0	0	0	0	0	0	0	0	0	0	0	0	0	0	0	0	0	0	0	0	0	0	0	0	0	0	0	0	0	0	0	0	0	0	0	0	0	0	0	0	0	0
3.4475	0	0	0				0	0	0	0	0	0	0	0	0	0	0	0	0	0	0	0	0	0	0	0	0	0	0	0	0	0	0	0	0	0	0	0	0	0	0	0	0	0	0	0	0	0	0
3.44952	0	0	0				0	0	0	0	0	0	0	0	0	0	0	0	0	0	0	0	0	0	0	0	0	0	0	0	0	0	0	0	0	0	0	0	0	0	0	0	0	0	0	0	0	0	0
3.45155	0	0	0				0	0	0	0	0	0	0	0	0	0	0	0	0	0	0	0	0	0	0	0	0	0	0	0	0	0	0	0	0	0	0	0	0	0	0	0	0	0	0	0	0	0	0
3.45357	0	0	0				0	0	0	0	0	0	0	0	0	0	0	0	0	0	0	0	0	0	0	0	0	0	0	0	0	0	0	0	0	0	0	0	0	0	0	0	0	0	0	0	0	0	0
3.45559	0	0	0				0	0	0	0	0	0	0	0	0	0	0	0	0	0	0	0	0	0	0	0	0	0	0	0	0	0	0	0	0	0	0	0	0	0	0	0	0	0	0	0	0	0	0
3.45761	0	0	0				0	0	0	0	0	0	0	0	0	0	0	0	0	0	0	0	0	0	0	0	0	0	0	0	0	0	0	0	0	0	0	0	0	0	0	0	0	0	0	0	0	0	0
3.45964	0	0	0				0	0	0	0	0	0	0	0	0	0	0	0	0	0	0	0	0	0	0	0	0	0	0	0	0	0	0	0	0	0	0	0	0	0	0	0	0	0	0	0	0	0	0
3.46166	0	0	0				0	0	0	0	0	0	0	0	0	0	0	0	0	0	0	0	0	0	0	0	0	0	0	0	0	0	0	0	0	0	0	0	0	0	0	0	0	0	0	0	0	0	0
3.46368	0	0	0				0	0	0	0	0	0	0	0	0	0	0	0	0	0	0	0	0	0	0	0	0	0	0	0	0	0	0	0	0	0	0	0	0	0	0	0	0	0	0	0	0	0	0
3.4657	0	0	0				0	0	0	0	0	0	0	0	0	0	0	0	0	0	0	0	0	0	0	0	0	0	0	0	0	0	0	0	0	0	0	0	0	0	0	0	0	0	0	0	0	0	0
3.46773	0	0	0				0	0	0	0	0	0	0	0	0	0	0	0	0	0	0	0	0	0	0	0	0	0	0	0	0	0	0	0	0	0	0	0	0	0	0	0	0	0	0	0	0	0	0
3.46975	0	0	0				0	0	0	0	0	0	0	0	0	0	0	0	0	0	0	0	0	0	0	0	0	0	0	0	0	0	0	0	0	0	0	0	0	0	0	0	0	0	0	0	0	0	0
3.47177	0	0	0				0	0	0	0	0	0	0	0	0	0	0	0	0	0	0	0	0	0	0	0	0	0	0	0	0	0	0	0	0	0	0	0	0	0	0	0	0	0	0	0	0	0	0
3.47379	0	0	0				0	0	0	0	0	0	0	0	0	0	0	0	0	0	0	0	0	0	0	0	0	0	0	0	0	0	0	0	0	0	0	0	0	0	0	0	0	0	0	0	0	0	0
3.47582	0	0	0				0	0	0	0	0	0	0	0	0	0	0	0	0	0	0	0	0	0	0	0	0	0	0	0	0	0	0	0	0	0	0	0	0	0	0	0	0	0	0	0	0	0	0
3.47784	0	0	0				0	0	0	0	0	0	0	0	0	0	0	0	0	0	0	0	0	0	0	0	0	0	0	0	0	0	0	0	0	0	0	0	0	0	0	0	0	0	0	0	0	0	0
3.47986	0	0	0				0	0	0	0	0	0	0	0	0	0	0	0	0	0	0	0	0	0	0	0	0	0	0	0	0	0	0	0	0	0	0	0	0	0	0	0	0	0	0	0	0	0	0
3.48189	0	0	0				0	0	0	0	0	0	0	0	0	0	0	0	0	0	0	0	0	0	0	0	0	0	0	0	0	0	0	0	0	0	0	0	0	0	0	0	0	0	0	0	0	0	0
3.48391	0	0	0				0	0	0	0	0	0	0	0	0	0	0	0	0	0	0	0	0	0	0	0	0	0	0	0	0	0	0	0	0	0	0	0	0	0	0	0	0	0	0	0	0	0	0
3.48593	0	0	0				0	0	0	0	0	0	0	0	0	0	0	0	0	0	0	0	0	0	0	0	0	0	0	0	0	0	0	0	0	0	0	0	0	0	0	0	0	0	0	0	0	0	0
3.48795	0	0	0				0	0	0	0	0	0	0	0	0	0	0	0	0	0	0	0	0	0	0	0	0	0	0	0	0	0	0	0	0	0	0	0	0	0	0	0	0	0	0	0	0	0	0
3.48998	0	0	0				0	0	0	0	0	0	0	0	0	0	0	0	0	0	0	0	0	0	0	0	0	0	0	0	0	0	0	0	0	0	0	0	0	0	0	0	0	0	0	0	0	0	0
3.492	0	0	0				0	0	0	0	0	0	0	0	0	0	0	0	0	0	0	0	0	0	0	0	0	0	0	0	0	0	0	0	0	0	0	0	0	0	0	0	0	0	0	0	0	0	0
3.49402	0	0	0				0	0	0	0	0	0	0	0	0	0	0	0	0	0	0	0	0	0	0	0	0	0	0	0	0	0	0	0	0	0	0	0	0	0	0	0	0	0	0	0	0	0	0
3.49604	0	0	0				0	0	0	0	0	0	0	0	0	0	0	0	0	0	0	0	0	0	0	0	0	0	0	0	0	0	0	0	0	0	0	0	0	0	0	0	0	0	0	0	0	0	0
3.49807	0	0	0				0	0	0	0	0	0	0	0	0	0	0	0	0	0	0	0	0	0	0	0	0	0	0	0	0	0	0	0	0	0	0	0	0	0	0	0	0	0	0	0	0	0	0
3.50009	0	0	0				0	0	0	0	0	0	0	0	0	0	0	0	0	0	0	0	0	0	0	0	0	0	0	0	0	0	0	0	0	0	0	0	0	0	0	0	0	0	0	0	0	0	0
3.50211	0	0	0				0	0	0	0	0	0	0	0	0	0	0	0	0	0	0	0	0	0	0	0	0	0	0	0	0	0	0	0	0	0	0	0	0	0	0	0	0	0	0	0	0	0	0
3.50413	0	0	0				0	0	0	0	0	0	0	0	0	0	0	0	0	0	0	0	0	0	0	0	0	0	0	0	0	0	0	0	0	0	0	0	0	0	0	0	0	0	0	0	0	0	0
3.50616	0	0	0				0	0	0	0	0	0	0	0	0	0	0	0	0	0	0	0	0	0	0	0	0	0	0	0	0	0	0	0	0	0	0	0	0	0	0	0	0	0	0	0	0	0	0
3.50818	0	0	0				0	0	0	0	0	0	0	0	0	0	0	0	0	0	0	0	0	0	0	0	0	0	0	0	0	0	0	0	0	0	0	0	0	0	0	0	0	0	0	0	0	0	0
3.5102	0	0	0				0	0	0	0	0	0	0	0	0	0	0	0	0	0	0	0	0	0	0	0	0	0	0	0	0	0	0	0	0	0	0	0	0	0	0	0	0	0	0	0	0	0	0
3.51222	0	0	0				0	0	0	0	0	0	0	0	0	0	0	0	0	0	0	0	0	0	0	0	0	0	0	0	0	0	0	0	0	0	0	0	0	0	0	0	0	0	0	0	0	0	0
3.51425	0	0	0				0	0	0	0	0	0	0	0	0	0	0	0	0	0	0	0	0	0	0	0	0	0	0	0	0	0	0	0	0	0	0	0	0	0	0	0	0	0	0	0	0	0	0
3.51627	0	0	0				0	0	0	0	0	0	0	0	0	0	0	0	0	0	0	0	0	0	0	0	0	0	0	0	0	0	0	0	0	0	0	0	0	0	0	0	0	0	0	0	0	0	0
3.51829	0	0	0				0	0	0	0	0	0	0	0	0	0	0	0	0	0	0	0	0	0	0	0	0	0	0	0	0	0	0	0	0	0	0	0	0	0	0	0	0	0	0	0	0	0	0
3.52031	0	0	0				0	0	0	0	0	0	0	0	0	0	0	0	0	0	0	0	0	0	0	0	0	0	0	0	0	0	0	0	0	0	0	0	0	0	0	0	0	0	0	0	0	0	0
3.52234	0	0	0				0	0	0	0	0	0	0	0	0	0	0	0	0	0	0	0	0	0	0	0	0	0	0	0	0	0	0	0	0	0	0	0	0	0	0	0	0	0	0	0	0	0	0
3.52436	0	0	0				0	0	0	0	0	0	0	0	0	0	0	0	0	0	0	0	0	0	0	0	0	0	0	0	0	0	0	0	0	0	0	0	0	0	0	0	0	0	0	0	0	0	0
3.52638	0	0	0				0	0	0	0	0	0	0	0	0	0	0	0	0	0	0	0	0	0	0	0	0	0	0	0	0	0	0	0	0	0	0	0	0	0	0	0	0	0	0	0	0	0	0
3.5284	0	0	0				0	0	0	0	0	0	0	0	0	0	0	0	0	0	0	0	0	0	0	0	0	0	0	0	0	0	0	0	0	0	0	0	0	0	0	0	0	0	0	0	0	0	0
3.53043	0	0	0				0	0	0	0	0	0	0	0	0	0	0	0	0	0	0	0	0	0	0	0	0	0	0	0	0	0	0	0	0	0	0	0	0	0	0	0	0	0	0	0	0	0	0
3.53245	0	0	0				0	0	0	0	0	0	0	0	0	0	0	0	0	0	0	0	0	0	0	0	0	0	0	0	0	0	0	0	0	0	0	0	0	0	0	0	0	0	0	0	0	0	0
3.53447	0	0	0				0	0	0	0	0	0	0	0	0	0	0	0	0	0	0	0	0	0	0	0	0	0	0	0	0	0	0	0	0	0	0	0	0	0	0	0	0	0	0	0	0	0	0
3.53649	0	0	0				0	0	0	0	0	0	0	0	0	0	0	0	0	0	0	0	0	0	0	0	0	0	0	0	0	0	0	0	0	0	0	0	0	0	0	0	0	0	0	0	0	0	0
3.53852	0	0	0				0	0	0	0	0	0	0	0	0	0	0	0	0	0	0	0	0	0	0	0	0	0	0	0	0	0	0	0	0	0	0	0	0	0	0	0	0	0	0	0	0	0	0
3.54054	0	0	0				0	0	0	0	0	0	0	0	0	0	0	0	0	0	0	0	0	0	0	0	0	0	0	0	0	0	0	0	0	0	0	0	0	0	0	0	0	0	0	0	0	0	0
3.54256	0	0	0				0	0	0	0	0	0	0	0	0	0	0	0	0	0	0	0	0	0	0	0	0	0	0	0	0	0	0	0	0	0	0	0	0	0	0	0	0	0	0	0	0	0	0
3.54459	0	0	0				0	0	0	0	0	0	0	0	0	0	0	0	0	0	0	0	0	0	0	0	0	0	0	0	0	0	0	0	0	0	0	0	0	0	0	0	0	0	0	0	0	0	0
3.54661	0	0	0				0	0	0	0	0	0	0	0	0	0	0	0	0	0	0	0	0	0	0	0	0	0	0	0	0	0	0	0	0	0	0	0	0	0	0	0	0	0	0	0	0	0	0
3.54863	0	0	0				0	0	0	0	0	0	0	0	0	0	0	0	0	0	0	0	0	0	0	0	0	0	0	0	0	0	0	0	0	0	0	0	0	0	0	0	0	0	0	0	0	0	0
3.55065	0	0	0				0	0	0	0	0	0	0	0	0	0	0	0	0	0	0	0	0	0	0	0	0	0	0	0	0	0	0	0	0	0	0	0	0	0	0	0	0	0	0	0	0	0	0
3.55268	0	0	0				0	0	0	0	0	0	0	0	0	0	0	0	0	0	0	0	0	0	0	0	0	0	0	0	0	0	0	0	0	0	0	0	0	0	0	0	0	0	0	0	0	0	0
3.5547	0	0	0				0	0	0	0	0	0	0	0	0	0	0	0	0	0	0	0	0	0	0	0	0	0	0	0	0	0	0	0	0	0	0	0	0	0	0	0	0	0	0	0	0	0	0
3.55672	0	0	0				0	0	0	0	0	0	0	0	0	0	0	0	0	0	0	0	0	0	0	0	0	0	0	0	0	0	0	0	0	0	0	0	0	0	0	0	0	0	0	0	0	0	0
3.55874	0	0	0				0	0	0	0	0	0	0	0	0	0	0	0	0	0	0	0	0	0	0	0	0	0	0	0	0	0	0	0	0	0	0	0	0	0	0	0	0	0	0	0	0	0	0
3.56077	0	0	0				0	0	0	0	0	0	0	0	0	0	0	0	0	0	0	0	0	0	0	0	0	0	0	0	0	0	0	0	0	0	0	0	0	0	0	0	0	0	0	0	0	0	0
3.56279	0	0	0				0	0	0	0	0	0	0	0	0	0	0	0	0	0	0	0	0	0	0	0	0	0	0	0	0	0	0	0	0	0	0	0	0	0	0	0	0	0	0	0	0	0	0
3.56481	0	0	0				0	0	0	0	0	0	0	0	0	0	0	0	0	0	0	0	0	0	0	0	0	0	0	0	0	0	0	0	0	0	0	0	0	0	0	0	0	0	0	0	0	0	0
3.56683	0	0	0				0	0	0	0	0	0	0	0	0	0	0	0	0	0	0	0	0	0	0	0	0	0	0	0	0	0	0	0	0	0	0	0	0	0	0	0	0	0	0	0	0	0	0
3.56886	0	0	0				0	0	0	0	0	0	0	0	0	0	0	0	0	0	0	0	0	0	0	0	0	0	0	0	0	0	0	0	0	0	0	0	0	0	0	0	0	0	0	0	0	0	0
3.57088	0	0	0				0	0	0	0	0	0	0	0	0	0	0	0	0	0	0	0	0	0	0	0	0	0	0	0	0	0	0	0	0	0	0	0	0	0	0	0	0	0	0	0	0	0	0
3.5729	0	0	0				0	0	0	0	0	0	0	0	0	0	0	0	0	0	0	0	0	0	0	0	0	0	0	0	0	0	0	0	0	0	0	0	0	0	0	0	0	0	0	0	0	0	0
3.57492	0	0	0				0	0	0	0	0	0	0	0	0	0	0	0	0	0	0	0	0	0	0	0	0	0	0	0	0	0	0	0	0	0	0	0	0	0	0	0	0	0	0	0	0	0	0
3.57695	0	0	0				0	0	0	0	0	0	0	0	0	0	0	0	0	0	0	0	0	0	0	0	0	0	0	0	0	0	0	0	0	0	0	0	0	0	0	0	0	0	0	0	0	0	0
3.57897	0	0	0				0	0	0	0	0	0	0	0	0	0	0	0	0	0	0	0	0	0	0	0	0	0	0	0	0	0	0	0	0	0	0	0	0	0	0	0	0	0	0	0	0	0	0
3.58099	0	0	0				0	0	0	0	0	0	0	0	0	0	0	0	0	0	0	0	0	0	0	0	0	0	0	0	0	0	0	0	0	0	0	0	0	0	0	0	0	0	0	0	0	0	0
3.58301	0	0	0				0	0	0	0	0	0	0	0	0	0	0	0	0	0	0	0	0	0	0	0	0	0	0	0	0	0	0	0	0	0	0	0	0	0	0	0	0	0	0	0	0	0	0
3.58504	0	0	0				0	0	0	0	0	0	0	0	0	0	0	0	0	0	0	0	0	0	0	0	0	0	0	0	0	0	0	0	0	0	0	0	0	0	0	0	0	0	0	0	0	0	0
3.58706	0	0	0				0	0	0	0	0	0	0	0	0	0	0	0	0	0	0	0	0	0	0	0	0	0	0	0	0	0	0	0	0	0	0	0	0	0	0	0	0	0	0	0	0	0	0
3.58908	0	0	0				0	0	0	0	0	0	0	0	0	0	0	0	0	0	0	0	0	0	0	0	0	0	0	0	0	0	0	0	0	0	0	0	0	0	0	0	0	0	0	0	0	0	0
3.5911	0	0	0				0	0	0	0	0	0	0	0	0	0	0	0	0	0	0	0	0	0	0	0	0	0	0	0	0	0	0	0	0	0	0	0	0	0	0	0	0	0	0	0	0	0	0
3.59313	0	0	0				0	0	0	0	0	0	0	0	0	0	0	0	0	0	0	0	0	0	0	0	0	0	0	0	0	0	0	0	0	0	0	0	0	0	0	0	0	0	0	0	0	0	0
3.59515	0	0	0				0	0	0	0	0	0	0	0	0	0	0	0	0	0	0	0	0	0	0	0	0	0	0	0	0	0	0	0	0	0	0	0	0	0	0	0	0	0	0	0	0	0	0
3.59717	0	0	0				0	0	0	0	0	0	0	0	0	0	0	0	0	0	0	0	0	0	0	0	0	0	0	0	0	0	0	0	0	0	0	0	0	0	0	0	0	0	0	0	0	0	0
3.5992	0	0	0				0	0	0	0	0	0	0	0	0	0	0	0	0	0	0	0	0	0	0	0	0	0	0	0	0	0	0	0	0	0	0	0	0	0	0	0	0	0	0	0	0	0	0
3.60122	0	0	0				0	0	0	0	0	0	0	0	0	0	0	0	0	0	0	0	0	0	0	0	0	0	0	0	0	0	0	0	0	0	0	0	0	0	0	0	0	0	0	0	0	0	0
3.60324	0	0	0				0	0	0	0	0	0	0	0	0	0	0	0	0	0	0	0	0	0	0	0	0	0	0	0	0	0	0	0	0	0	0	0	0	0	0	0	0	0	0	0	0	0	0
3.60526	0	0	0				0	0	0	0	0	0	0	0	0	0	0	0	0	0	0	0	0	0	0	0	0	0	0	0	0	0	0	0	0	0	0	0	0	0	0	0	0	0	0	0	0	0	0
3.60729	0	0	0				0	0	0	0	0	0	0	0	0	0	0	0	0	0	0	0	0	0	0	0	0	0	0	0	0	0	0	0	0	0	0	0	0	0	0	0	0	0	0	0	0	0	0
3.60931	0	0	0				0	0	0	0	0	0	0	0	0	0	0	0	0	0	0	0	0	0	0	0	0	0	0	0	0	0	0	0	0	0	0	0	0	0	0	0	0	0	0	0	0	0	0
3.61133	0	0	0				0	0	0	0	0	0	0	0	0	0	0	0	0	0	0	0	0	0	0	0	0	0	0	0	0	0	0	0	0	0	0	0	0	0	0	0	0	0	0	0	0	0	0
3.61335	0	0	0				0	0	0	0	0	0	0	0	0	0	0	0	0	0	0	0	0	0	0	0	0	0	0	0	0	0	0	0	0	0	0	0	0	0	0	0	0	0	0	0	0	0	0
3.61538	0	0	0				0	0	0	0	0	0	0	0	0	0	0	0	0	0	0	0	0	0	0	0	0	0	0	0	0	0	0	0	0	0	0	0	0	0	0	0	0	0	0	0	0	0	0
3.6174	0	0	0				0	0	0	0	0	0	0	0	0	0	0	0	0	0	0	0	0	0	0	0	0	0	0	0	0	0	0	0	0	0	0	0	0	0	0	0	0	0	0	0	0	0	0
3.61942	0	0	0				0	0	0	0	0	0	0	0	0	0	0	0	0	0	0	0	0	0	0	0	0	0	0	0	0	0	0	0	0	0	0	0	0	0	0	0	0	0	0	0	0	0	0
3.62144	0	0	0				0	0	0	0	0	0	0	0	0	0	0	0	0	0	0	0	0	0	0	0	0	0	0	0	0	0	0	0	0	0	0	0	0	0	0	0	0	0	0	0	0	0	0
3.62347	0	0	0				0	0	0	0	0	0	0	0	0	0	0	0	0	0	0	0	0	0	0	0	0	0	0	0	0	0	0	0	0	0	0	0	0	0	0	0	0	0	0	0	0	0	0
3.62549	0	0	0				0	0	0	0	0	0	0	0	0	0	0	0	0	0	0	0	0	0	0	0	0	0	0	0	0	0	0	0	0	0	0	0	0	0	0	0	0	0	0	0	0	0	0
3.62751	0	0	0				0	0	0	0	0	0	0	0	0	0	0	0	0	0	0	0	0	0	0	0	0	0	0	0	0	0	0	0	0	0	0	0	0	0	0	0	0	0	0	0	0	0	0
3.62953	0	0	0				0	0	0	0	0	0	0	0	0	0	0	0	0	0	0	0	0	0	0	0	0	0	0	0	0	0	0	0	0	0	0	0	0	0	0	0	0	0	0	0	0	0	0
3.63156	0	0	0				0	0	0	0	0	0	0	0	0	0	0	0	0	0	0	0	0	0	0	0	0	0	0	0	0	0	0	0	0	0	0	0	0	0	0	0	0	0	0	0	0	0	0
3.63358	0	0	0				0	0	0	0	0	0	0	0	0	0	0	0	0	0	0	0	0	0	0	0	0	0	0	0	0	0	0	0	0	0	0	0	0	0	0	0	0	0	0	0	0	0	0
3.6356	0	0	0				0	0	0	0	0	0	0	0	0	0	0	0	0	0	0	0	0	0	0	0	0	0	0	0	0	0	0	0	0	0	0	0	0	0	0	0	0	0	0	0	0	0	0
3.63762	0	0	0				0	0	0	0	0	0	0	0	0	0	0	0	0	0	0	0	0	0	0	0	0	0	0	0	0	0	0	0	0	0	0	0	0	0	0	0	0	0	0	0	0	0	0
3.63965	0	0	0				0	0	0	0	0	0	0	0	0	0	0	0	0	0	0	0	0	0	0	0	0	0	0	0	0	0	0	0	0	0	0	0	0	0	0	0	0	0	0	0	0	0	0
3.64167	0	0	0				0	0	0	0	0	0	0	0	0	0	0	0	0	0	0	0	0	0	0	0	0	0	0	0	0	0	0	0	0	0	0	0	0	0	0	0	0	0	0	0	0	0	0
3.64369	0	0	0				0	0	0	0	0	0	0	0	0	0	0	0	0	0	0	0	0	0	0	0	0	0	0	0	0	0	0	0	0	0	0	0	0	0	0	0	0	0	0	0	0	0	0
3.64571	0	0	0				0	0	0	0	0	0	0	0	0	0	0	0	0	0	0	0	0	0	0	0	0	0	0	0	0	0	0	0	0	0	0	0	0	0	0	0	0	0	0	0	0	0	0
3.64774	0	0	0				0	0	0	0	0	0	0	0	0	0	0	0	0	0	0	0	0	0	0	0	0	0	0	0	0	0	0	0	0	0	0	0	0	0	0	0	0	0	0	0	0	0	0
3.64976	0	0	0				0	0	0	0	0	0	0	0	0	0	0	0	0	0	0	0	0	0	0	0	0	0	0	0	0	0	0	0	0	0	0	0	0	0	0	0	0	0	0	0	0	0	0
3.65178	0	0	0				0	0	0	0	0	0	0	0	0	0	0	0	0	0	0	0	0	0	0	0	0	0	0	0	0	0	0	0	0	0	0	0	0	0	0	0	0	0	0	0	0	0	0
3.65381	0	0	0				0	0	0	0	0	0	0	0	0	0	0	0	0	0	0	0	0	0	0	0	0	0	0	0	0	0	0	0	0	0	0	0	0	0	0	0	0	0	0	0	0	0	0
3.65583	0	0	0				0	0	0	0	0	0	0	0	0	0	0	0	0	0	0	0	0	0	0	0	0	0	0	0	0	0	0	0	0	0	0	0	0	0	0	0	0	0	0	0	0	0	0
3.65785	0	0	0				0	0	0	0	0	0	0	0	0	0	0	0	0	0	0	0	0	0	0	0	0	0	0	0	0	0	0	0	0	0	0	0	0	0	0	0	0	0	0	0	0	0	0
3.65987	0	0	0				0	0	0	0	0	0	0	0	0	0	0	0	0	0	0	0	0	0	0	0	0	0	0	0	0	0	0	0	0	0	0	0	0	0	0	0	0	0	0	0	0	0	0
3.6619	0	0	0				0	0	0	0	0	0	0	0	0	0	0	0	0	0	0	0	0	0	0	0	0	0	0	0	0	0	0	0	0	0	0	0	0	0	0	0	0	0	0	0	0	0	0
3.66392	0	0	0				0	0	0	0	0	0	0	0	0	0	0	0	0	0	0	0	0	0	0	0	0	0	0	0	0	0	0	0	0	0	0	0	0	0	0	0	0	0	0	0	0	0	0
3.66594	0	0	0				0	0	0	0	0	0	0	0	0	0	0	0	0	0	0	0	0	0	0	0	0	0	0	0	0	0	0	0	0	0	0	0	0	0	0	0	0	0	0	0	0	0	0
3.66796	0	0	0				0	0	0	0	0	0	0	0	0	0	0	0	0	0	0	0	0	0	0	0	0	0	0	0	0	0	0	0	0	0	0	0	0	0	0	0	0	0	0	0	0	0	0
3.66999	0	0	0				0	0	0	0	0	0	0	0	0	0	0	0	0	0	0	0	0	0	0	0	0	0	0	0	0	0	0	0	0	0	0	0	0	0	0	0	0	0	0	0	0	0	0
3.67201	0	0	0				0	0	0	0	0	0	0	0	0	0	0	0	0	0	0	0	0	0	0	0	0	0	0	0	0	0	0	0	0	0	0	0	0	0	0	0	0	0	0	0	0	0	0
3.67403	0	0	0				0	0	0	0	0	0	0	0	0	0	0	0	0	0	0	0	0	0	0	0	0	0	0	0	0	0	0	0	0	0	0	0	0	0	0	0	0	0	0	0	0	0	0
3.67605	0	0	0				0	0	0	0	0	0	0	0	0	0	0	0	0	0	0	0	0	0	0	0	0	0	0	0	0	0	0	0	0	0	0	0	0	0	0	0	0	0	0	0	0	0	0
3.67808	0	0	0				0	0	0	0	0	0	0	0	0	0	0	0	0	0	0	0	0	0	0	0	0	0	0	0	0	0	0	0	0	0	0	0	0	0	0	0	0	0	0	0	0	0	0
3.6801	0	0	0				0	0	0	0	0	0	0	0	0	0	0	0	0	0	0	0	0	0	0	0	0	0	0	0	0	0	0	0	0	0	0	0	0	0	0	0	0	0	0	0	0	0	0
3.68212	0	0	0				0	0	0	0	0	0	0	0	0	0	0	0	0	0	0	0	0	0	0	0	0	0	0	0	0	0	0	0	0	0	0	0	0	0	0	0	0	0	0	0	0	0	0
[truncated: 126 more rows]
[truncated: 158 more columns]
