# Supplementary material for: A new Fourier transformation method for SAXS of polymer lamellar crystals
Source: Royal Society of Chemistry journal article supplement (doi:10.1039/d0ce00157k), 2020-01-01
Supplement: d0ce00157k2.pdf [file d0ce00157k2.pdf]

## Supporting information

# New Fourier Transformation Method for SAXS of Polymer Lamellar Crystals

Xiangyang Li\*, Jianjun Ding, Pujing Chen, Kang Zheng, Lin Chen and Xingyou Tian

*Institute of Applied Technology, CAS Key Laboratory of Photovoltaic and Energy Conservation Materials, Hefei Institutes of Physical Science, Chinese Academy of Sciences, Hefei 230088, China*

### S1. Small-angle X-ray scatterings obtained during isothermal crystallization of iPP at 130 °C

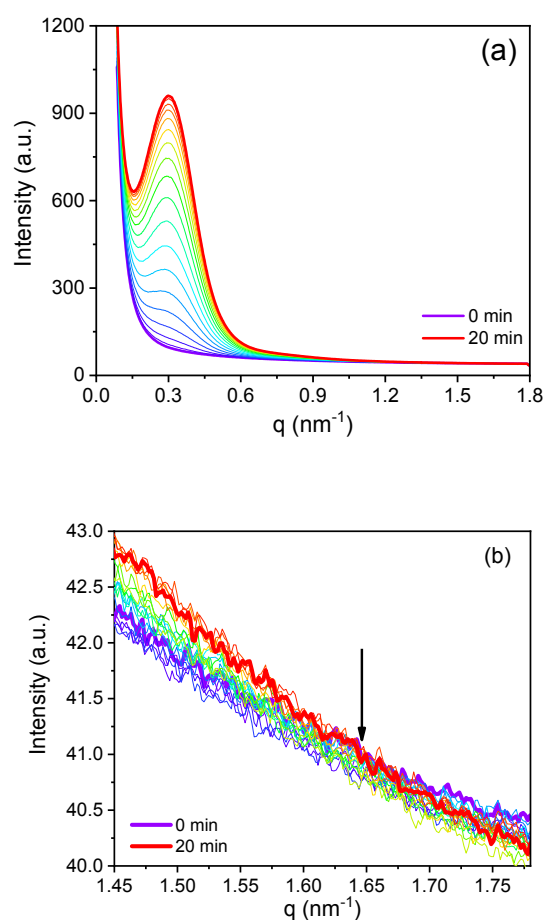

**Figure S1.** Scattering profiles of iPP collected during isothermal crystallization at 130 °C after removal of thermal history at 220 °C for 5 min.

### S2. Determination of form factors of a lamellar crystal and a crystal embryo at

**$\theta_i = 0^\circ$  and  $\theta_i = 15^\circ$**

Scattering intensity of a crystal plane can be determined with following equation:

$$I_\phi = I_e \left( \sum_{n=0}^{N_c-1} \cos n\phi \right)^2 = \left( \frac{\sin \frac{N_c \phi}{2} \cos \frac{(N_c+1)\phi}{2}}{\sin \frac{\phi}{2}} \right)^2 I_e \quad (\text{S1})$$

where  $N_c$  is the number of electrons on a crystalline plane,  $\phi$  is the phase difference between adjacent electrons, and  $I_e$  is the scattering intensity of a single electron.  $\phi$  is determined with the following equation:

$$\phi = qa \sin(\theta_i - \theta) \quad (\text{S2})$$

Here  $a$  is the average distance between adjacent electrons,  $\theta_i$  is the incident angle,  $\theta$  is the scattered angle. The symbol  $q$  is the wave section, which is defined as:

$$q = \frac{4\pi \sin \theta}{\lambda} \quad (\text{S3})$$

The derivation of Eq. 1 and 2 can be seen in our last study (Li et al. IUCrJ 2019, 6, 968–983). Assuming the average distance between adjacent electrons  $a = 0.17$  nm, the number of electrons on a crystal plane with lateral size of  $l_0 = 100$  nm is around 588, while the number of electrons on a crystal plane with lateral size of  $l_0 = 10$  nm is around 59. Assuming  $I_e = 1$ , it can determine the scatterings of the crystal planes with  $l_0 = 10$  nm and 100 nm at  $\theta_i = 0^\circ$  and  $15^\circ$  with  $N_c$  and  $a$  using Eq. S1-3. The results are shown in Figure 7b-c.
